# Supplementary material for: Tandem Peterson olefination and chemoselective asymmetric hydrogenation of β-hydroxy silanes
Source: PubMed Central journal article supplement — Chem Sci. 2019 Feb 4;10(12):3649–53. doi: 10.1039/c8sc05261a (PMC6438149; doi:10.1039/c8sc05261a), 2019-02-04
Supplement: SC-010-C8SC05261A-s001.pdf [file SC-010-C8SC05261A-s001.pdf]

Supporting Information for:

## **Tandem Peterson Olefination and Asymmetric Hydrogenation of $\beta$ -Hydroxy Silanes.**

Suppachai Krajangsri, ‡<sup>a</sup> Haibo Wu, ‡<sup>a</sup> Jianguo Liu, ‡<sup>a</sup> Wangchuk Rabten,<sup>a</sup> Thishana Singh<sup>b</sup> and Pher G. Andersson\*<sup>a</sup>

[a] Department of Organic Chemistry, Stockholm University, 106 91, Stockholm, Sweden. (Pher.Andersson@su.se)

[b] School of Chemistry and Physics, University of Kwazulu-Natal, Private Bag X54001, Durban, 4000, South Africa

(‡ S.K, H.W and J.L contributed equally.)

### **Contents**

|                                                                                                 |      |
|-------------------------------------------------------------------------------------------------|------|
| 1.General methods.....                                                                          | S2   |
| 2.Procedure for synthesis of $\beta$ -hydroxy silane.....                                       | S3   |
| 3.Procedure for synthesis of Iridium complexes and intermediates .....                          | S7   |
| 4.General procedure for asymmetric hydrogenations .....                                         | S21  |
| 5. <sup>1</sup> H and <sup>13</sup> C NMR spectroscopic data of the substrates .....            | S25  |
| 6. <sup>1</sup> H and <sup>13</sup> C NMR spectroscopic data for the hydrogenated products..... | S91  |
| 7. <sup>1</sup> H and <sup>13</sup> C NMR spectroscopic data of (S)-(+)-curmurene.....          | S99  |
| 8. GC and SFC Chromatograms .....                                                               | S101 |
| 9. NMR spectra and chromatograms for the competition study .....                                | S114 |
| 10. Additional experiments for mechanistic study.....                                           | S121 |
| 11. References .....                                                                            | S123 |

## 1. General methods

All reactions were conducted under nitrogen atmosphere using magnetic stirring.

CH<sub>2</sub>Cl<sub>2</sub> was freshly distilled using CaH<sub>2</sub> under nitrogen atmosphere. THF was freshly distilled using sodium-benzophenone under nitrogen.

All reagents were used as supplied commercially without further purification. Chromatographic separations were performed on Kiesel gel 60 H silica gel (particle size: 0.063-0.100 mm) or Brockmann I, activated, basic Al<sub>2</sub>O<sub>3</sub> (particle size: ~150 mesh). Thin layer chromatography (TLC) was performed on aluminium plates coated with Kieselgel 60 (0.20 mm, UV254) and visualized under ultraviolet light ( $\nu = 254$  nm), or by staining with ethanolic phosphomolybdic acid and heating.

<sup>1</sup>H NMR spectra were recorded on a Bruker 400 MHz or 500 MHz at 400/500 MHz in CDCl<sub>3</sub> and referenced internally to the residual CDCl<sub>3</sub> peak (7.26 ppm). <sup>13</sup>C NMR spectra were recorded at 100/125 MHz in CDCl<sub>3</sub> and referenced to the central peak of CDCl<sub>3</sub> (77.0 ppm). Chemical shifts are reported in ppm ( $\delta$  scale).

Enantiomeric excesses were determined by either using chiral HPLC with a diode array detector at 220 nm and 254 nm or using a chiral GC with an MS detector. (Refer to the individual compounds for specific chromatographic details.) Racemic compounds were used for comparison.

HRMS data were obtained using a Bruker MicroTOF-Q II instrument operation at ambient temperature.

Optical rotations were recorded on an Autopol IV polarimeter from Rudolph Research Analytical, equipped with a sodium lamp (589 nm) and a 10 cm cell.

IR spectra were recorded on a Perkin-Elmer Spectrum One spectrometer using samples that were prepared in CHCl<sub>3</sub>.

## 2. Procedure for synthesis of $\beta$ -hydroxy silane

To a solution of ketones in dry Et<sub>2</sub>O, the TMSCH<sub>2</sub>MgCl<sup>1</sup> solution (1.5 equiv.) was slowly added under N<sub>2</sub> atmosphere at 0°C. The reaction mixture was allowed to stir overnight at room temperature. After completion, checking by TLC, the reaction was quenched with 10% NaHCO<sub>3</sub> at 0°C. The aqueous phase was extracted with ether. The combined organic phase was dried over Na<sub>2</sub>SO<sub>4</sub>. The crude product was purified by deactivated silica gel (10% Et<sub>3</sub>N/pentane) with 10-15% of EtOAc/Pentane (1% Et<sub>3</sub>N) as eluent.

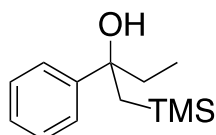

### 2-Phenyl-1-(trimethylsilyl)butan-2-ol

This compound has been reported.<sup>2</sup>

Colorless oil, 1.43g, 86%yield.

<sup>1</sup>H NMR (400 MHz, Chloroform-*d*)  $\delta$  7.41 – 7.36 (m, 2H), 7.31 (tt,  $J$  = 8.4, 1.7 Hz, 2H), 7.24 – 7.18 (m, 1H), 1.98 – 1.78 (m, 2H), 1.65 (s, 1H), 1.34 (d,  $J$  = 4.6 Hz, 2H), 0.73 (t,  $J$  = 7.4 Hz, 3H), -0.17 (s, 9H).

<sup>13</sup>C NMR (101 MHz, CDCl<sub>3</sub>)  $\delta$  147.62, 127.82, 126.12, 125.10, 77.37, 39.07, 33.08, 8.13, -0.02.

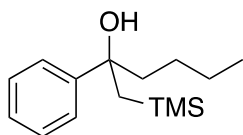

### 2-Phenyl-1-(trimethylsilyl)hexan-2-ol

Colorless oil, 1.29g, 84%yield.

<sup>1</sup>H NMR (400 MHz, Chloroform-*d*)  $\delta$  7.41 – 7.36 (m, 2H), 7.34 – 7.28 (m, 2H), 7.23 – 7.17 (m, 1H), 1.93 – 1.75 (m, 2H), 1.67 (s, 1H), 1.57 (s, 1H), 1.34 (d,  $J$  = 3.5 Hz, 2H), 1.30 – 1.19 (m, 3H), 1.04 – 0.93 (m, 1H), 0.83 (t,  $J$  = 7.2 Hz, 3H), -0.17 (s, 9H).

<sup>13</sup>C NMR (101 MHz, CDCl<sub>3</sub>)  $\delta$  148.08, 127.88, 126.13, 125.02, 77.24, 46.50, 33.56, 26.01, 22.96, 14.01, 0.00.

IR (CHCl<sub>3</sub>, neat, cm<sup>-1</sup>):  $\nu$  = 3490, 2955, 1602, 1446, 1248, 1030, 961, 860, 839, 764.

HRMS-ESI;  $m/z$  [M+Na<sup>+</sup>] = 273.1643, calcd. For C<sub>15</sub>H<sub>26</sub>NaOSi: 273.1645.

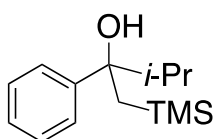

### 3-Methyl-2-phenyl-1-(trimethylsilyl)butan-2-ol

Colorless oil, 1.00 g, 85%yield.

<sup>1</sup>H NMR (400 MHz, Chloroform-*d*)  $\delta$  7.39 – 7.34 (m, 2H), 7.33 – 7.27 (m, 2H), 7.23 – 7.17 (m, 1H), 1.98 (p,  $J$  = 6.8 Hz, 2H), 1.57 (d,  $J$  = 4.8 Hz, 2H), 1.35 (d,  $J$  = 8.6 Hz, 2H), 0.96 (d,  $J$  = 6.7 Hz, 3H), 0.69 (d,  $J$  = 6.8 Hz, 3H), -0.24 (s, 9H).

<sup>13</sup>C NMR (101 MHz, CDCl<sub>3</sub>)  $\delta$  146.89, 127.59, 126.06, 125.61, 79.15, 40.74, 29.85, 17.56, 16.75, -0.02.

IR (CHCl<sub>3</sub>, neat, cm<sup>-1</sup>):  $\nu$  = 3620, 2958, 1446, 1386, 1247, 1175, 935, 857, 836, 702.

HRMS-ESI;  $m/z$  [M+Na<sup>+</sup>] = 259.1501, calcd. For C<sub>14</sub>H<sub>24</sub>NaOSi: 259.1489.

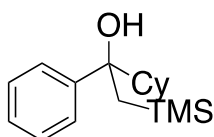

### 1-Cyclohexyl-1-phenyl-2-(trimethylsilyl)ethan-1-ol

Colorless oil, 1.39 g, 95%yield.

<sup>1</sup>H NMR (400 MHz, Chloroform-*d*)  $\delta$  7.35 (dd,  $J$  = 8.4, 1.3 Hz, 2H), 7.32 – 7.27 (m, 2H), 7.22 – 7.17 (m, 1H), 2.06 – 1.96 (m, 1H), 1.79 (dt,  $J$  = 12.9, 3.2 Hz, 1H), 1.72 – 1.50 (m, 5H), 1.46 – 0.81 (m, 8H), -0.23 (s, 9H).

$^{13}\text{C}$  NMR (101 MHz,  $\text{CDCl}_3$ )  $\delta$  146.95, 127.53, 125.99, 125.67, 79.12, 51.13, 29.57, 27.50, 26.72, 26.70, 26.69, 26.38, 0.04.

IR ( $\text{CHCl}_3$ , neat,  $\text{cm}^{-1}$ ):  $\nu$  = 3612, 2929, 1446, 1247, 838, 802.

HRMS-ESI;  $m/z$  [ $\text{M}+\text{Na}^+$ ] = 299.1809, calcd. For  $\text{C}_{17}\text{H}_{28}\text{NaOSi}$ : 299.1802.

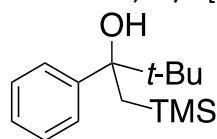

**3,3-Dimethyl-2-phenyl-1-(trimethylsilyl)butan-2-ol**

Colorless oil, 1.27 g, 82% yield.

$^1\text{H}$  NMR (400 MHz, Chloroform-*d*)  $\delta$  7.43 – 7.37 (m, 2H), 7.31 – 7.23 (m, 2H), 7.23 – 7.17 (m, 1H), 1.70 (s, 1H), 1.60 (d,  $J$  = 14.8 Hz, 1H), 1.33 (d,  $J$  = 14.8 Hz, 1H), 0.90 (s, 9H), -0.24 (d,  $J$  = 1.0 Hz, 9H).

$^{13}\text{C}$  NMR (101 MHz,  $\text{CDCl}_3$ )  $\delta$  164.89, 146.75, 136.61, 121.50, 119.80, 38.91, 32.11, 7.97, -0.11.

IR ( $\text{CHCl}_3$ , neat,  $\text{cm}^{-1}$ ):  $\nu$  = 3397, 2963, 1593, 1434, 1386, 1246, 1062, 969, 861, 841.

HRMS-ESI;  $m/z$  [ $\text{M}-\text{MeOH}$ ] $^+$  = 206.1473, calcd. For  $\text{C}_{13}\text{H}_{22}\text{Si}$ : 206.1485.

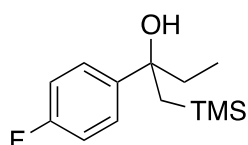

**2-(4-Fluorophenyl)-1-(trimethylsilyl)butan-2-ol**

Colorless oil, 1.37 g, 86% yield.

$^1\text{H}$  NMR (400 MHz, Chloroform-*d*)  $\delta$  7.38 – 7.32 (m, 2H), 7.02 – 6.96 (m, 2H), 1.94 – 1.75 (m, 1H), 1.60 (s, 2H), 1.32 (d,  $J$  = 3.6 Hz, 2H), 0.72 (t,  $J$  = 7.4 Hz, 3H), -0.17 (s, 9H).

$^{13}\text{C}$  NMR (101 MHz,  $\text{CDCl}_3$ )  $\delta$  161.4 (d,  $J$  = 243.0 Hz), 143.39, 143.36, 126.80 (d,  $J$  = 7.8 Hz), 114.51 (d,  $J$  = 21.0 Hz), 77.16, 39.35, 33.24, 8.09, -0.00.

IR ( $\text{CHCl}_3$ , neat,  $\text{cm}^{-1}$ ):  $\nu$  = 3483, 2966, 1603, 1508, 1248, 1159, 912, 836.

HRMS-ESI;  $m/z$  [ $\text{M}+\text{Na}^+$ ] = 263.1235, calcd. For  $\text{C}_{13}\text{H}_{21}\text{FNaOSi}$ : 263.1238.

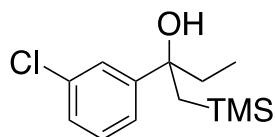

**2-(3-Chlorophenyl)-1-(trimethylsilyl)butan-2-ol**

Colorless oil, 1.34 g, 88% yield.

$^1\text{H}$  NMR (400 MHz, Chloroform-*d*)  $\delta$  7.42 – 7.38 (m, 1H), 7.28 – 7.23 (m, 2H), 7.23 – 7.16 (m, 2H), 1.93 – 1.75 (m, 2H), 1.63 (s, 1H), 1.31 (d,  $J$  = 1.0 Hz, 2H), 0.73 (t,  $J$  = 7.4 Hz, 3H), -0.15 (s, 9H).

$^{13}\text{C}$  NMR (101 MHz,  $\text{CDCl}_3$ )  $\delta$  149.99, 133.94, 129.13, 126.26, 125.59, 123.40, 77.17, 39.14, 33.09, 8.06, 0.01.

IR ( $\text{CHCl}_3$ , neat,  $\text{cm}^{-1}$ ):  $\nu$  = 3606, 2965, 1596, 1419, 1248, 1095, 840, 776.

HRMS-ESI;  $m/z$  [ $\text{M}+\text{Na}^+$ ] = 279.0951, calcd. For  $\text{C}_{13}\text{H}_{21}\text{ClNaOSi}$ : 279.0942.

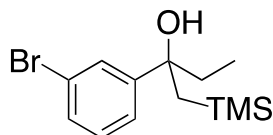

**2-(3-Bromophenyl)-1-(trimethylsilyl)butan-2-ol**

Colorless oil, 0.62 g, 88% yield.

$^1\text{H}$  NMR (400 MHz, Chloroform-*d*)  $\delta$  7.56 (t,  $J$  = 1.8 Hz, 1H), 7.36 – 7.29 (m, 2H), 7.18 (t,  $J$  = 7.8 Hz, 1H), 1.94 – 1.75 (m, 2H), 1.63 (s, 1H), 1.31 (d,  $J$  = 0.9 Hz, 2H), 0.73 (t,  $J$  = 7.4 Hz, 3H), -0.15 (s, 9H).

$^{13}\text{C}$  NMR (101 MHz,  $\text{CDCl}_3$ )  $\delta$  150.28, 129.47, 129.24, 128.52, 123.87, 122.32, 77.18, 39.17, 33.15, 8.09, 0.04.

IR ( $\text{CHCl}_3$ , neat,  $\text{cm}^{-1}$ ):  $\nu$  = 3481, 2965, 1564, 1416, 1248, 1095, 958, 859, 840, 780.

HRMS-ESI;  $m/z$  [ $\text{M}+\text{Na}^+$ ] = 323.0439, calcd. For  $\text{C}_{13}\text{H}_{21}\text{BrNaOSi}$ : 323.0437.

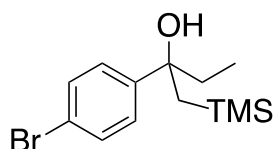

**2-(4-Bromophenyl)-1-(trimethylsilyl)butan-2-ol**

Colorless oil, 1.29 g, 89% yield.



$^1\text{H}$  NMR (400 MHz, Chloroform-*d*)  $\delta$  7.46 – 7.41 (m, 2H), 7.30 – 7.25 (m, 2H), 1.83 (dq,  $J = 9.8, 6.8$  Hz, 2H), 1.60 (s, 1H), 1.31 (d,  $J = 2.7$  Hz, 2H), 0.71 (t,  $J = 7.4$  Hz, 3H), -0.15 (s, 9H).

$^{13}\text{C}$  NMR (101 MHz,  $\text{CDCl}_3$ )  $\delta$  146.79, 130.88, 127.12, 120.01, 77.21, 39.26, 33.04, 8.07, 0.07.

IR ( $\text{CHCl}_3$ , neat,  $\text{cm}^{-1}$ ):  $\nu = 3601, 2965, 1487, 1394, 1248, 1009, 910, 860, 839, 691$ .

HRMS-ESI;  $m/z$  [ $\text{M}+\text{Na}^+$ ] = 323.0440, calcd. For  $\text{C}_{13}\text{H}_{21}\text{BrNaOSi}$ : 323.0437.

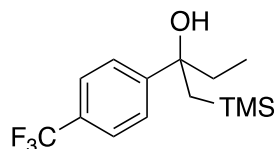

**2-(4-(Trifluoromethyl)phenyl)-1-(trimethylsilyl)butan-2-ol**

Colorless oil, 1.28 g, 89% yield.

$^1\text{H}$  NMR (400 MHz, Chloroform-*d*)  $\delta$  7.60 – 7.55 (m, 2H), 7.54 – 7.49 (m, 2H), 1.95 – 1.79 (m, 2H), 1.34 (d,  $J = 2.3$  Hz, 2H), 0.72 (t,  $J = 7.4$  Hz, 3H), -0.16 (s, 9H).

$^{13}\text{C}$  NMR (101 MHz,  $\text{CDCl}_3$ )  $\delta$  151.85, 128.52 (q,  $J = 32.3$  Hz), 125.65, (d,  $J = 8.0$  Hz), 124.84 (q,  $J = 3.8$  Hz), 122.99, 77.39, 39.35, 33.17, 8.01, 0.00.

IR ( $\text{CHCl}_3$ , neat,  $\text{cm}^{-1}$ ):  $\nu = 3490, 2966, 1618, 1410, 1326, 1127, 913, 839, 692$ .

HRMS-ESI;  $m/z$  [ $\text{M}^++\text{Na}$ ] = 291.1399, calcd. For  $\text{C}_{14}\text{H}_{22}\text{FNaOSi}$ : 291.1387.

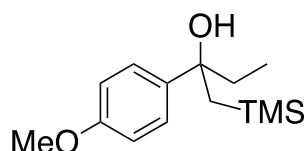

**2-(4-Methoxyphenyl)-1-(trimethylsilyl)butan-2-ol**

Colorless oil, 1.17 g, 76% yield.

$^1\text{H}$  NMR (400 MHz, Chloroform-*d*)  $\delta$  7.32 – 7.27 (m, 2H), 6.88 – 6.82 (m, 2H), 3.80 (s, 3H), 1.94 – 1.74 (m, 2H), 1.61 (s, 1H), 1.31 (d,  $J = 4.1$  Hz, 2H), 0.73 (t,  $J = 7.4$  Hz, 3H), -0.16 (s, 9H).

$^{13}\text{C}$  NMR (101 MHz,  $\text{CDCl}_3$ )  $\delta$  157.93, 139.90, 126.24, 113.12, 77.13, 55.15, 33.05, 8.19, 0.04.

IR ( $\text{CHCl}_3$ , neat,  $\text{cm}^{-1}$ ):  $\nu = 3515, 2953, 1610, 1510, 1247, 1037, 912, 834, 691$ .

HRMS-ESI;  $m/z$  [ $\text{M}+\text{Na}^+$ ] = 275.1450, calcd. For  $\text{C}_{14}\text{H}_{24}\text{NaO}_2\text{Si}$ : 275.1438.

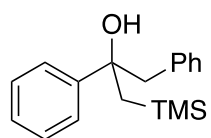

**1,2-Diphenyl-3-(trimethylsilyl)propan-2-ol**

White solid, 0.72 g, 51% yield.

$^1\text{H}$  NMR (400 MHz, Chloroform-*d*)  $\delta$  7.35 – 7.25 (m, 4H), 7.24 – 7.15 (m, 4H), 6.94 – 6.88 (m, 2H), 3.25 – 3.00 (m, 2H), 1.81 (s, 1H), 1.52 – 1.26 (m, 2H), -0.21 (s, 9H).

$^{13}\text{C}$  NMR (101 MHz,  $\text{CDCl}_3$ )  $\delta$  147.43, 136.61, 130.64, 128.00, 127.79, 126.59, 126.29, 125.29, 76.87, 53.39, 32.57, 0.01.

HRMS-ESI;  $m/z$  [ $\text{M}+\text{Na}^+$ ] = 307.1482, calcd. For  $\text{C}_{18}\text{H}_{24}\text{NaOSi}$ : 307.1489.

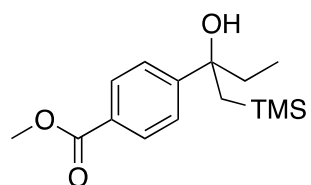

**Methyl 4-(2-hydroxy-1-(trimethylsilyl)butan-2-yl)benzoate**

White solid, 524 mg, 71% yield.

$^1\text{H}$  NMR (400 MHz, Chloroform-*d*)  $\delta$  8.02 – 7.96 (m, 2H), 7.50 – 7.44 (m, 2H), 3.90 (s, 3H), 1.97 – 1.77 (m, 2H), 1.40 – 1.26 (m, 2H), 0.71 (t,  $J = 7.4$  Hz, 3H), -0.18 (s, 9H).

$^{13}\text{C}$  NMR (101 MHz,  $\text{CDCl}_3$ )  $\delta$  167.07, 153.07, 129.26, 128.05, 125.29, 51.96, 39.36, 33.08, 8.01, 0.02.

HRMS-ESI;  $m/z$  [ $\text{M}+\text{Na}^+$ ] = 303.1391, calcd. For  $\text{C}_{15}\text{H}_{24}\text{NaO}_3\text{Si}$ : 303.1387.

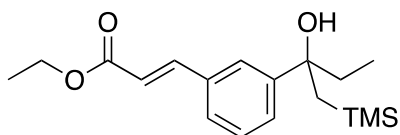

**Ethyl (E)-3-(3-(2-hydroxy-1-(trimethylsilyl)but-2-yl)phenyl)acrylate**

Colorless oil, 0.774 g, 77% yield.

$^1\text{H NMR}$  (400 MHz, Chloroform-*d*)  $\delta$  7.70 (d,  $J = 16.0$  Hz, 1H), 7.59 – 7.56 (m, 1H), 7.40 (td,  $J = 8.5, 8.0, 3.0$  Hz, 2H), 7.36 – 7.30 (m, 1H), 6.46 (d,  $J = 16.0$  Hz, 1H), 1.87 (tq,  $J = 14.0, 7.3$  Hz, 2H), 1.34 (t,  $J = 7.1$  Hz, 5H), 0.73 (t,  $J = 7.4$  Hz, 3H), -0.17 (s, 9H).

$^{13}\text{C NMR}$  (101 MHz,  $\text{CDCl}_3$ )  $\delta$  167.05, 148.48, 145.01, 134.03, 128.47, 127.29, 125.91, 125.07, 118.06, 77.27, 60.45, 39.23, 33.18, 14.33, 8.11, 0.03.

HRMS-ESI;  $m/z$  [ $\text{M}+\text{Na}^+$ ] = 343.1697, calcd. For  $\text{C}_{18}\text{H}_{28}\text{NaO}_3\text{Si}$ : 343.1700.

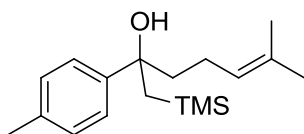

**6-Methyl-2-(p-tolyl)-1-(trimethylsilyl)hept-5-en-2-ol**

Colorless oil, 99% yield.

$^1\text{H NMR}$  (400 MHz, Chloroform-*d*)  $\delta$  7.28 – 7.24 (m, 2H), 7.14 – 7.09 (m, 2H), 5.12 – 5.04 (m, 1H), 2.33 (s, 3H), 1.98 – 1.79 (m, 4H), 1.65 (s, 3H), 1.47 (s, 3H), 1.31 (s, 2H), -0.18 (s, 9H).  $^{13}\text{C NMR}$  (101 MHz,  $\text{CDCl}_3$ )  $\delta$  145.06, 135.70, 132.27, 128.72, 125.13, 124.50, 46.41, 33.99, 25.88, 23.13, 21.11, 17.83, 0.22.

HRMS-ESI;  $m/z$  [ $\text{M}+\text{Na}^+$ ] = 313.1944, calcd. For  $\text{C}_{18}\text{H}_{28}\text{NaO}_3\text{Si}$ : 313.1958.

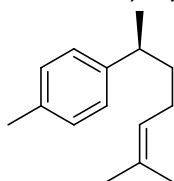

**(+) curmuene**

**(S)-(+)-curcumene**

Colorless oil, 76% yield.

$[\alpha]_{\text{D}}^{24.0} = +41$  (c 0.83,  $\text{CHCl}_3$ ) (Lit.<sup>56</sup>:  $[\alpha]_{\text{D}}^{20.0} = +48$  (c. 1.19,  $\text{CHCl}_3$ ))

$^1\text{H NMR}$  (400 MHz,  $\text{CDCl}_3$ )  $\delta$  7.18 – 7.05 (m, 4H), 5.17 – 5.06 (m, 1H), 2.76 – 2.59 (m, 1H), 2.35 (s, 3H), 1.97 – 1.82 (m, 2H), 1.70 (s, 3H), 1.67 – 1.57 (m, 2H), 1.56 (s, 3H), 1.25 (dd,  $J = 6.9, 1.2$  Hz, 3H).  $^{13}\text{C NMR}$  (101 MHz,  $\text{CDCl}_3$ )  $\delta$  145.06, 135.70, 132.27, 128.72, 125.13, 124.50, 46.41, 33.99, 25.88, 23.13, 21.11, 17.83.

**Preparation of Ethyl (E)-3-(3-propionylphenyl)acrylate**

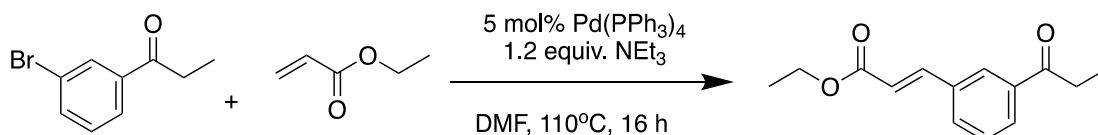

3-Bromo propiophenone (20 mmol) was placed in 100 mL round bottom flask, dissolved in DMF 40 mL. Following by addition of ethyl acrylate (24 mmol), 5 mol% of  $\text{Pd}(\text{PPh}_3)_4$  and triethylamine 24 mmol. The reaction mixture was heated to 110 °C and was allowed to run for 16 h. The reaction mixture was allowed to cool down

then was diluted with EtOAc. The mixture was added water. The aqueous phase was extracted with EtOAc. The combined organic phase was washed water several times, dried over Na<sub>2</sub>SO<sub>4</sub>. Removing the solvent under vacuum. The crude mixture was purification by column chromatography to yield the desired product. NMR spectra are match with the literature. (Peacock, L. R.; Chapman, R. S. L.; Sedgwick, A. C.; Bull, S. D.; Mahon, M. F.; Amans, D. *Org. Lett.*, 2015, 17, 994.)

### 3. Procedure for synthesis of Iridium complexes and intermediates

**General procedure for the preparation of amides:** To a solution of the corresponding acyl chloride (10 mmol) in CH<sub>2</sub>Cl<sub>2</sub> (80 mL) was added in one portion the corresponding hydroxyl amino acid (10 mmol). A solution of triethylamine (3.5 mL, 25 mmol) in CH<sub>2</sub>Cl<sub>2</sub> (20 mL) was added at 0°C over 30 min. The resulting mixture was stirred at room temperature for 3 h. The solvent was removed in vacuo and the residue purified by chromatography to afford the corresponding amides.

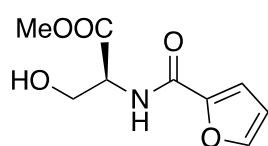

#### Methyl (furan-2-carbonyl)-L-serinate

Colorless oil, 2.04g, 96% yield.

$[\alpha]_D^{22.0} = +48.00$  (c 0.3, CHCl<sub>3</sub>)

<sup>1</sup>H NMR (400 MHz, Chloroform-*d*)  $\delta$  7.45 (dd, *J* = 1.7, 0.8 Hz, 1H), 7.31 (d, *J* = 7.3 Hz, 1H), 7.12 (dd, *J* = 3.5, 0.7 Hz, 1H), 6.48 (dd, *J* = 3.5, 1.8 Hz, 1H), 4.80 (dt, *J* = 7.4, 3.6 Hz, 1H), 4.02 (ddd, *J* = 30.6, 11.3, 3.6 Hz, 2H), 3.79 (s, 3H), 2.91 (br, 1H).

<sup>13</sup>C NMR (101 MHz, CDCl<sub>3</sub>)  $\delta$  170.89, 158.60, 147.25, 144.63, 115.25, 112.33, 63.30, 54.54, 52.94.

HRMS-ESI; *m/z* [M+Na<sup>+</sup>] = 236.0534, calcd. For C<sub>9</sub>H<sub>11</sub>NNaO<sub>5</sub>: 236.0529.

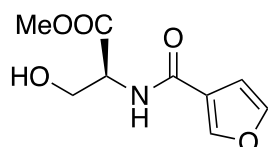

#### Methyl (furan-3-carbonyl)-L-serinate

Colorless oil, 1.98g, 93% yield.

$[\alpha]_D^{22.0} = +48.33$  (c 0.3, CHCl<sub>3</sub>)

<sup>1</sup>H NMR (400 MHz, Chloroform-*d*)  $\delta$  7.99 (d, *J* = 0.9 Hz, 1H), 7.43 (t, *J* = 1.7 Hz, 1H), 6.86 (d, *J* = 6.9 Hz, 1H), 6.68 (dd, *J* = 1.8, 0.6 Hz, 1H), 4.82 (dt, *J* = 7.3, 3.6 Hz, 1H), 4.06 – 3.94 (m, 2H), 3.80 (s, 3H), 2.95 (t, *J* = 6.0 Hz, 1H).

<sup>13</sup>C NMR (101 MHz, CDCl<sub>3</sub>)  $\delta$  171.18, 163.04, 145.52, 144.05, 121.94, 108.47, 63.50, 54.81, 53.02.

HRMS-ESI; *m/z* [M+Na<sup>+</sup>] = 236.0534, calcd. For C<sub>9</sub>H<sub>11</sub>NNaO<sub>5</sub>: 236.0529.

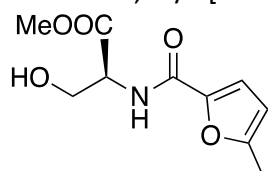

#### Methyl (5-methylfuran-2-carbonyl)-L-serinate

Colorless oil, 2.11g, 93% yield.

$[\alpha]_D^{22.0} = +56.00$  (c 0.3, CHCl<sub>3</sub>)

$^1\text{H}$  NMR (400 MHz, Chloroform-*d*)  $\delta$  7.24 (d,  $J$  = 2.0 Hz, 1H), 6.73 (d,  $J$  = 6.3 Hz, 1H), 6.52 (d,  $J$  = 2.0 Hz, 1H), 4.79 (dt,  $J$  = 7.3, 3.7 Hz, 1H), 4.07 – 3.94 (m, 2H), 3.80 (s, 3H), 3.02 (t,  $J$  = 6.0 Hz, 1H), 2.57 (s, 3H).

$^{13}\text{C}$  NMR (101 MHz,  $\text{CDCl}_3$ )  $\delta$  171.33, 164.28, 157.66, 140.63, 115.04, 108.66, 63.68, 54.80, 52.97, 13.71.

HRMS-ESI;  $m/z$  [ $\text{M}+\text{Na}^+$ ] = 250.0695, calcd. For  $\text{C}_{10}\text{H}_{13}\text{NNaO}_5$ : 250.0686.

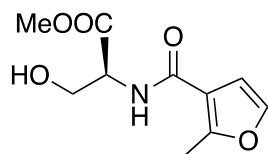

**Methyl (2-methylfuran-3-carbonyl)-L-serinate**

Colorless oil, 2.04g, 90% yield.

$[\alpha]_{\text{D}}^{22.0} = +42.00$  (c 0.3,  $\text{CHCl}_3$ )

$^1\text{H}$  NMR (400 MHz, Chloroform-*d*)  $\delta$  7.19 (d,  $J$  = 7.3 Hz, 1H), 7.02 (d,  $J$  = 3.4 Hz, 1H), 4.80 (dt,  $J$  = 7.5, 3.7 Hz, 1H), 4.05 (ddd,  $J$  = 11.1, 6.1, 3.9 Hz, 2H), 3.79 (s, 3H), 3.11 (t,  $J$  = 5.9 Hz, 1H), 2.33 (s, 3H).  $^{13}\text{C}$  NMR (101 MHz,  $\text{CDCl}_3$ )  $\delta$  171.04, 158.73, 155.37, 145.62, 116.58, 108.78, 63.48, 54.52, 52.91, 13.93.

HRMS-ESI;  $m/z$  [ $\text{M}+\text{Na}^+$ ] = 250.0691, calcd. For  $\text{C}_{10}\text{H}_{13}\text{NNaO}_5$ : 250.0686.

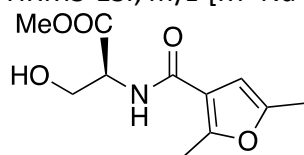

**Methyl (2,5-dimethylfuran-3-carbonyl)-L-serinate**

Colorless oil, 2.05g, 85% yield.

$[\alpha]_{\text{D}}^{22.0} = +40.67$  (c 0.3,  $\text{CHCl}_3$ )

$^1\text{H}$  NMR (400 MHz, Chloroform-*d*)  $\delta$  6.64 (s, 1H), 6.09 (s, 1H), 4.80 – 4.74 (m, 1H), 4.06 – 3.90 (m, 2H), 3.79 (s, 3H), 2.51 (s, 3H), 2.23 (s, 3H).

$^{13}\text{C}$  NMR (101 MHz,  $\text{CDCl}_3$ )  $\delta$  171.34, 164.56, 155.95, 150.30, 115.51, 104.29, 63.74, 54.79, 52.92, 13.63, 13.34.

HRMS-ESI;  $m/z$  [ $\text{M}+\text{Na}^+$ ] = 264.0843, calcd. For  $\text{C}_{11}\text{H}_{15}\text{NNaO}_5$ : 264.0842.

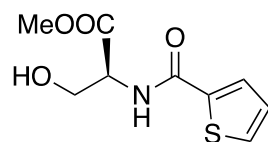

**Methyl (thiophene-2-carbonyl)-L-serinate**

Colorless oil, 2.10g, 92% yield.

$[\alpha]_{\text{D}}^{22.0} = +53.00$  (c 0.3,  $\text{CHCl}_3$ )

$^1\text{H}$  NMR (400 MHz, Chloroform-*d*)  $\delta$  7.59 (dd,  $J$  = 3.7, 1.0 Hz, 1H), 7.50 (dd,  $J$  = 5.0, 1.0 Hz, 1H), 7.10 – 7.01 (m, 2H), 4.83 (dt,  $J$  = 7.2, 3.6 Hz, 1H), 4.11 – 3.97 (m, 2H), 3.80 (s, 3H), 2.96 (t,  $J$  = 5.3 Hz, 1H).

$^{13}\text{C}$  NMR (101 MHz,  $\text{CDCl}_3$ )  $\delta$  171.12, 162.28, 138.00, 130.95, 129.02, 127.90, 63.46, 55.19, 53.03.

HRMS-ESI;  $m/z$  [ $\text{M}+\text{Na}^+$ ] = 252.0302, calcd. For  $\text{C}_9\text{H}_{11}\text{NNaO}_4\text{S}$ : 252.0301.

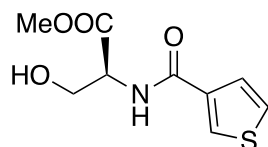

**Methyl (thiophene-3-carbonyl)-L-serinate**

Colorless oil, 2.01g, 87% yield.

$[\alpha]_{\text{D}}^{22.0} = +45.00$  (c 0.3,  $\text{CHCl}_3$ )

$^1\text{H}$  NMR (400 MHz, Chloroform-*d*)  $\delta$  7.94 (dd,  $J$  = 3.0, 1.3 Hz, 1H), 7.42 (dd,  $J$  = 5.1, 1.3 Hz, 1H), 7.30 (dd,  $J$  = 5.1, 3.0 Hz, 1H), 7.11 (d,  $J$  = 7.3 Hz, 1H), 4.81 (dt,  $J$  = 7.3, 3.6 Hz, 1H), 4.09 – 3.93 (m, 2H), 3.78 (s, 3H), 3.30 (t,  $J$  = 6.0 Hz, 1H).

$^{13}\text{C}$  NMR (101 MHz,  $\text{CDCl}_3$ )  $\delta$  171.24, 163.40, 136.50, 129.37, 126.74, 126.30, 63.35, 55.04, 52.95.

HRMS-ESI;  $m/z$  [ $\text{M}+\text{Na}^+$ ] = 252.0308, calcd. For  $\text{C}_9\text{H}_{11}\text{NNaO}_4\text{S}$ : 252.0301.

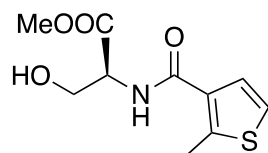

**Methyl (2-methylthiophene-3-carbonyl)-L-serinate**

Colorless oil, 2.08 g, 86% yield.

$[\alpha]_D^{22.0} = +34.67$  (c 0.3, CHCl<sub>3</sub>)

<sup>1</sup>H NMR (400 MHz, Chloroform-*d*) δ 7.20 (d, *J* = 5.4 Hz, 1H), 7.03 (d, *J* = 5.4 Hz, 1H), 6.80 (d, *J* = 6.8 Hz, 1H), 4.82 (dt, *J* = 7.2, 3.6 Hz, 1H), 4.09 – 3.96 (m, 2H), 3.81 (s, 3H), 2.80 (t, *J* = 5.9 Hz, 1H), 2.71 (s, 3H).

<sup>13</sup>C NMR (101 MHz, CDCl<sub>3</sub>) δ 171.24, 164.74, 145.73, 131.05, 126.76, 122.15, 63.75, 55.02, 53.00, 15.09.

HRMS-ESI; *m/z* [M+Na<sup>+</sup>] = 266.0468, calcd. For C<sub>10</sub>H<sub>13</sub>NNaO<sub>4</sub>S: 266.0457.

#### General procedure for the preparation of oxazoline esters:

To a solution of the corresponding amide (10 mmol) in CH<sub>2</sub>Cl<sub>2</sub> (40 mL) was added dropwise diethylaminosulfur trifluoride (1.45 mL, 11 mmol) at -78°C. This solution was then stirred at this temperature for 1 h. Anhydrous K<sub>2</sub>CO<sub>3</sub> (2.07 g, 15 mmol) was added in one portion and the reaction mixture allowed to warm to room temperature. After 2 h, saturated NaHCO<sub>3</sub> (aq) (50 mL) was added and the organic layer separated, dried over Na<sub>2</sub>SO<sub>4</sub>, filtered and the solvent removed in vacuum. The residue was purified by chromatography to give the desired oxazoline esters.

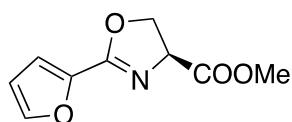

#### Methyl (S)-2-(furan-2-yl)-4,5-dihydrooxazole-4-carboxylate

Colorless oil, 87% yield.

$[\alpha]_D^{22.0} = +144.00$  (c 0.3, CHCl<sub>3</sub>)

<sup>1</sup>H NMR (400 MHz, Chloroform-*d*) δ 7.55 (dd, *J* = 1.7, 0.7 Hz, 1H), 7.04 – 6.99 (m, 1H), 6.49 (dd, *J* = 3.5, 1.8 Hz, 1H), 4.93 (dd, *J* = 10.4, 7.9 Hz, 1H), 4.66 (dd, *J* = 8.6, 8.0 Hz, 1H), 4.56 (dd, *J* = 10.4, 8.7 Hz, 1H), 3.79 (s, 3H).

<sup>13</sup>C NMR (101 MHz, CDCl<sub>3</sub>) δ 171.39, 158.50, 145.84, 142.31, 115.69, 111.79, 69.80, 68.56, 52.87.

HRMS-ESI; *m/z* [M+Na<sup>+</sup>] = 218.0428, calcd. For C<sub>9</sub>H<sub>9</sub>NNaO<sub>4</sub>: 218.0424.

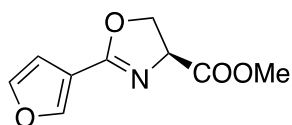

#### Methyl (S)-2-(furan-3-yl)-4,5-dihydrooxazole-4-carboxylate

Colorless oil, 93% yield.

$[\alpha]_D^{22.0} = +146.33$  (c 0.3, CHCl<sub>3</sub>)

<sup>1</sup>H NMR (400 MHz, Chloroform-*d*) δ 7.92 (s, 1H), 7.42 (t, *J* = 1.7 Hz, 1H), 6.79 (d, *J* = 1.5 Hz, 1H), 4.87 (dd, *J* = 10.5, 7.9 Hz, 1H), 4.60 (t, *J* = 8.3 Hz, 1H), 4.50 (dd, *J* = 10.5, 8.7 Hz, 1H), 3.79 (s, 3H).

<sup>13</sup>C NMR (101 MHz, CDCl<sub>3</sub>) δ 171.59, 161.68, 145.62, 143.90, 115.00, 109.61, 69.30, 68.44, 52.82.

HRMS-ESI; *m/z* [M+Na<sup>+</sup>] = 218.0426, calcd. For C<sub>9</sub>H<sub>9</sub>NNaO<sub>4</sub>: 218.0424.

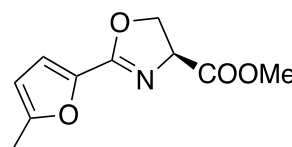

#### Methyl (S)-2-(5-methylfuran-2-yl)-4,5-dihydrooxazole-4-carboxylate

Colorless oil, 85% yield.

$[\alpha]_D^{22.0} = +136.00$  (c 0.3, CHCl<sub>3</sub>)

<sup>1</sup>H NMR (400 MHz, Chloroform-*d*) δ 6.91 (d, *J* = 3.3 Hz, 1H), 6.11 – 6.07 (m, 1H), 4.90 (dd, *J* = 10.4, 7.9 Hz, 1H), 4.63 (t, *J* = 8.2 Hz, 1H), 4.53 (dd, *J* = 10.4, 8.6 Hz, 1H), 3.79 (s, 3H), 2.36 (s, 3H).

$^{13}\text{C}$  NMR (101 MHz,  $\text{CDCl}_3$ )  $\delta$  171.57, 158.62, 156.73, 140.62, 117.07, 108.22, 69.70, 68.54, 52.83, 13.99.

HRMS-ESI;  $m/z$  [ $\text{M}+\text{Na}^+$ ] = 232.0585, calcd. For  $\text{C}_{10}\text{H}_{11}\text{NNaO}_4$ : 232.0580.

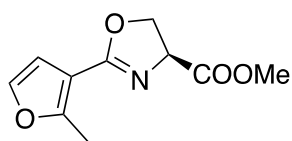

**Methyl (S)-2-(2-methylfuran-3-yl)-4,5-dihydrooxazole-4-carboxylate**

Colorless oil, 92% yield.

$[\alpha]_{\text{D}}^{22.0} = +138.33$  (c 0.3,  $\text{CHCl}_3$ )

$^1\text{H}$  NMR (400 MHz, Chloroform-*d*)  $\delta$  7.19 (d,  $J = 7.3$  Hz, 1H), 7.02 (d,  $J = 3.4$  Hz, 1H), 4.80 (dt,  $J = 7.5, 3.7$  Hz, 1H), 4.05 (ddd,  $J = 11.1, 6.1, 3.9$  Hz, 2H), 3.79 (s, 3H), 3.11 (t,  $J = 5.9$  Hz, 1H), 2.33 (s, 3H).

$^{13}\text{C}$  NMR (101 MHz,  $\text{CDCl}_3$ )  $\delta$  171.04, 158.73, 155.37, 145.62, 116.58, 108.78, 63.48, 54.52, 52.91, 13.93.

HRMS-ESI;  $m/z$  [ $\text{M}+\text{H}^+$ ] = 210.0765, calcd. For  $\text{C}_{10}\text{H}_{12}\text{NO}_4$ : 210.0761.

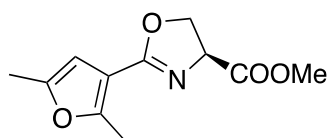

**Methyl (S)-2-(2,5-dimethylfuran-3-yl)-4,5-dihydrooxazole-4-carboxylate**

Colorless oil, 94% yield.

$[\alpha]_{\text{D}}^{22.0} = +140.00$  (c 0.3,  $\text{CHCl}_3$ )

$^1\text{H}$  NMR (400 MHz, Chloroform-*d*)  $\delta$  6.25 (s, 1H), 4.84 (dd,  $J = 10.4, 7.7$  Hz, 1H), 4.61 – 4.53 (m, 1H), 4.48 (dd,  $J = 10.4, 8.6$  Hz, 1H), 3.79 (s, 3H), 2.49 (s, 3H), 2.23 (s, 3H).

$^{13}\text{C}$  NMR (101 MHz,  $\text{CDCl}_3$ )  $\delta$  172.03, 163.00, 154.79, 150.42, 109.97, 106.27, 69.13, 68.26, 52.70, 13.81, 13.28.

HRMS-ESI;  $m/z$  [ $\text{M}+\text{H}^+$ ] = 224.0920, calcd. For  $\text{C}_{11}\text{H}_{14}\text{NO}_4$ : 224.0917.

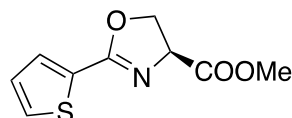

**Methyl (S)-2-(thiophen-2-yl)-4,5-dihydrooxazole-4-carboxylate**

Colorless oil, 86% yield.

$[\alpha]_{\text{D}}^{22.0} = +134.00$  (c 0.3,  $\text{CHCl}_3$ )

$^1\text{H}$  NMR (400 MHz, Chloroform-*d*)  $\delta$  7.67 (dd,  $J = 3.7, 1.0$  Hz, 1H), 7.48 (dd,  $J = 5.0, 1.1$  Hz, 1H), 7.08 (dd,  $J = 5.0, 3.7$  Hz, 1H), 4.92 (dd,  $J = 10.4, 7.8$  Hz, 1H), 4.68 (t,  $J = 8.2$  Hz, 1H), 4.58 (dd,  $J = 10.4, 8.6$  Hz, 1H), 3.81 (s, 3H).

$^{13}\text{C}$  NMR (101 MHz,  $\text{CDCl}_3$ )  $\delta$  171.56, 162.11, 131.46, 130.80, 129.38, 127.79, 70.04, 68.77, 52.87.

HRMS-ESI;  $m/z$  [ $\text{M}+\text{Na}^+$ ] = 234.0916, calcd. For  $\text{C}_9\text{H}_9\text{NNaO}_3\text{S}$ : 234.0195.

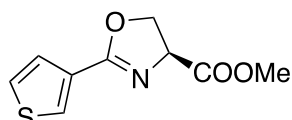

**Methyl (S)-2-(thiophen-3-yl)-4,5-dihydrooxazole-4-carboxylate**

Colorless oil, 91% yield.

$[\alpha]_{\text{D}}^{22.0} = +128.33$  (c 0.3,  $\text{CHCl}_3$ )

$^1\text{H}$  NMR (400 MHz, Chloroform-*d*)  $\delta$  7.97 (dd,  $J = 3.0, 1.1$  Hz, 1H), 7.57 (dd,  $J = 5.1, 1.2$  Hz, 1H), 7.34 (dd,  $J = 5.1, 3.0$  Hz, 1H), 4.94 (dd,  $J = 10.5, 7.9$  Hz, 1H), 4.67 (dd,  $J = 8.6, 7.9$  Hz, 1H), 4.57 (dd,  $J = 10.5, 8.7$  Hz, 1H), 3.83 (s, 3H).

$^{13}\text{C}$  NMR (101 MHz,  $\text{CDCl}_3$ )  $\delta$  171.70, 162.67, 129.90, 129.20, 127.51, 126.37, 69.46, 68.66, 52.85.

HRMS-ESI;  $m/z$  [ $\text{M}+\text{H}^+$ ] = 212.0372, calcd. For  $\text{C}_9\text{H}_{10}\text{NO}_3\text{S}$ : 212.0376.

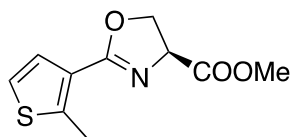

**Methyl (S)-2-(2-methylthiophen-3-yl)-4,5-dihydrooxazole-4-carboxylate**

Colorless oil, 89% yield.

$[\alpha]_D^{22.0} = +118.67$  (c 0.3, CHCl<sub>3</sub>)

<sup>1</sup>H NMR (400 MHz, Chloroform-*d*) δ 7.20 (d, *J* = 5.4 Hz, 1H), 7.03 (d, *J* = 5.4 Hz, 1H), 6.80 (d, *J* = 6.8 Hz, 1H), 4.82 (dt, *J* = 7.2, 3.6 Hz, 1H), 4.09 – 3.96 (m, 2H), 3.81 (s, 3H), 2.80 (t, *J* = 5.9 Hz, 1H), 2.71 (s, 3H).

<sup>13</sup>C NMR (101 MHz, CDCl<sub>3</sub>) δ 171.24, 164.74, 145.73, 131.05, 126.76, 122.15, 63.75, 55.02, 53.00, 15.09.

HRMS-ESI; *m/z* [M+Na<sup>+</sup>] = 248.0364, calcd. For C<sub>10</sub>H<sub>11</sub>NNaO<sub>3</sub>S: 248.0352.

**General procedure for the reduction of the oxazoline esters with Grignard reagents:**

To a solution of the corresponding oxazoline ester (10 mmol) in THF/diethyl ether 1:1 (50 mL) was added dropwise a solution of the Grignard reagent in THF (22 mmol) at 0°C. The mixture was then stirred for 3 h, allowed to warm to room temperature and stirred overnight. The reaction was quenched with saturated NH<sub>4</sub>Cl aq. (50 mL) and followed by the addition of additional diethyl ether (40 mL) and water (40 mL). The organic layer was separated, washed with water, dried over Na<sub>2</sub>SO<sub>4</sub>, filtered and the solvent removed in vacuo. The residue was purified by chromatography to give the desired tertiary oxazoline alcohols.

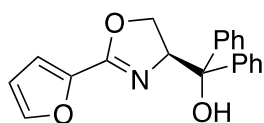

**(S)-2-(2-(Furan-2-yl)-4,5-dihydrooxazol-4-yl) diphenylmethanol**

White solid, 87% yield.

$[\alpha]_D^{22.0} = -74.00$  (c 0.3, CHCl<sub>3</sub>)

<sup>1</sup>H NMR (400 MHz, Chloroform-*d*) δ 7.70 – 7.61 (m, 2H), 7.54 – 7.50 (m, 1H), 7.48 – 7.42 (m, 2H), 7.32 (dt, *J* = 11.7, 7.7 Hz, 4H), 7.25 – 7.17 (m, 2H), 6.97 (d, *J* = 3.4 Hz, 1H), 6.47 (dd, *J* = 3.4, 1.7 Hz, 1H), 5.52 (t, *J* = 9.5 Hz, 1H), 4.29 – 4.14 (m, 2H), 2.63 (br, 1H).

<sup>13</sup>C NMR (101 MHz, CDCl<sub>3</sub>) δ 158.88, 145.79, 145.63, 144.22, 142.72, 128.48, 128.45, 127.26, 127.04, 125.75, 115.42, 111.73, 78.23, 73.22, 69.41.

HRMS-ESI; *m/z* [M+Na<sup>+</sup>] = 342.1101, calcd. For C<sub>20</sub>H<sub>17</sub>NNaO<sub>3</sub>: 342.1101.

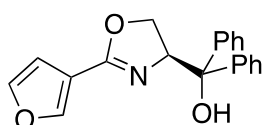

**(S)-2-(2-(Furan-3-yl)-4,5-dihydrooxazol-4-yl) diphenylmethanol**

White solid, 90% yield.

$[\alpha]_D^{22.0} = -47.00$  (c 0.3, CHCl<sub>3</sub>)

<sup>1</sup>H NMR (400 MHz, Chloroform-*d*) δ 7.89 (d, *J* = 0.5 Hz, 1H), 7.69 – 7.62 (m, 2H), 7.49 – 7.44 (m, 2H), 7.40 (t, *J* = 1.7 Hz, 1H), 7.37 – 7.28 (m, 4H), 7.28 – 7.18 (m, 2H), 6.74 (dd, *J* = 1.9, 0.7 Hz, 1H), 5.44 (t, *J* = 9.4 Hz, 1H), 4.22 – 4.11 (m, 2H), 2.66 (s, 1H).

<sup>13</sup>C NMR (101 MHz, CDCl<sub>3</sub>) δ 162.07, 146.05, 145.49, 144.24, 143.70, 128.46, 128.35, 127.23, 127.06, 127.04, 125.82, 115.47, 109.80, 78.26, 73.07, 69.04.

HRMS-ESI; *m/z* [M+H<sup>+</sup>] = 320.1278, calcd. For C<sub>20</sub>H<sub>18</sub>NO<sub>3</sub>: 320.1281.

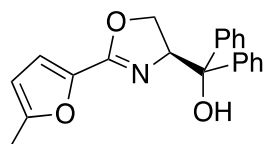

**(S)-2-(2-(5-methylfuran-2-yl)-4,5-dihydrooxazol-4-yl) diphenylmethanol**

White solid, 83% yield.

$[\alpha]_D^{22.0} = -95.33$  (c 0.3,  $\text{CHCl}_3$ )

$^1\text{H NMR}$  (400 MHz, Chloroform-*d*)  $\delta$  7.70 – 7.63 (m, 2H), 7.46 (dd,  $J = 5.2, 3.4$  Hz, 2H), 7.37 – 7.26 (m, 4H), 7.26 – 7.17 (m, 2H), 6.88 (d,  $J = 3.3$  Hz, 1H), 6.08 (dd,  $J = 3.3, 0.9$  Hz, 1H), 5.50 (t,  $J = 9.4$  Hz, 1H), 4.19 (m, 2H), 2.64 (s, 1H), 2.35 (s, 3H).

$^{13}\text{C NMR}$  (101 MHz,  $\text{CDCl}_3$ )  $\delta$  158.98, 156.36, 145.94, 144.29, 141.07, 128.45, 128.40, 127.22, 127.09, 127.00, 125.75, 116.82, 108.19, 78.25, 73.24, 69.20, 14.03.

HRMS-ESI;  $m/z$   $[\text{M}+\text{H}^+] = 334.1440$ , calcd. For  $\text{C}_{21}\text{H}_{20}\text{NO}_3$ : 334.1438.

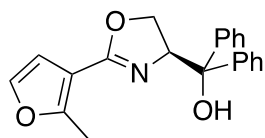

**(S)-(2-(2-methylfuran-3-yl)-4,5-dihydrooxazol-4-yl)diphenylmethanol**

White solid, 92% yield.

$[\alpha]_D^{22.0} = -41.67$  (c 0.3,  $\text{CHCl}_3$ )

$^1\text{H NMR}$  (400 MHz, Chloroform-*d*)  $\delta$  7.65 (d,  $J = 7.8$  Hz, 2H), 7.46 (d,  $J = 7.8$  Hz, 2H), 7.38 – 7.28 (m, 4H), 7.25 – 7.19 (m, 3H), 6.62 (d,  $J = 1.8$  Hz, 1H), 5.40 (t,  $J = 9.4$  Hz, 1H), 4.21 – 4.11 (m, 2H), 2.63 (s, 1H), 2.51 (s, 3H).

$^{13}\text{C NMR}$  (101 MHz,  $\text{CDCl}_3$ )  $\delta$  163.14, 156.39, 146.22, 144.36, 140.64, 128.41, 128.23, 127.21, 127.13, 127.01, 125.91, 110.80, 109.97, 78.29, 73.02, 68.87, 13.86.

HRMS-ESI;  $m/z$   $[\text{M}+\text{H}^+] = 334.1447$ , calcd. For  $\text{C}_{21}\text{H}_{20}\text{NO}_3$ : 334.1438.

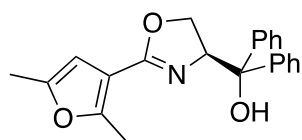

**(S)-(2-(2,5-dimethylfuran-3-yl)-4,5-dihydrooxazol-4-yl)diphenylmethanol**

White foam, 95% yield.

$[\alpha]_D^{22.0} = -43.33$  (c 0.3,  $\text{CHCl}_3$ )

$^1\text{H NMR}$  (400 MHz, Chloroform-*d*)  $\delta$  7.67 – 7.62 (m, 2H), 7.48 – 7.42 (m, 2H), 7.35 – 7.27 (m, 4H), 7.25 – 7.18 (m, 2H), 6.19 (d,  $J = 0.8$  Hz, 1H), 5.38 (t,  $J = 9.3$  Hz, 1H), 4.17 – 4.10 (m, 2H), 2.62 (s, 1H), 2.45 (s, 3H), 2.22 (s, 3H).

$^{13}\text{C NMR}$  (101 MHz,  $\text{CDCl}_3$ )  $\delta$  163.43, 154.64, 150.27, 146.30, 144.39, 128.40, 128.22, 127.20, 127.09, 126.98, 125.92, 110.38, 106.38, 78.28, 72.96, 68.80, 13.81, 13.32.

HRMS-ESI;  $m/z$   $[\text{M}+\text{H}^+] = 348.1600$ , calcd. For  $\text{C}_{22}\text{H}_{22}\text{NO}_3$ : 348.1594.

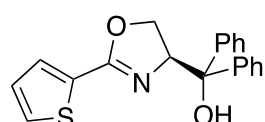

**(S)-diphenyl(2-(thiophen-2-yl)-4,5-dihydrooxazol-4-yl)methanol**

White solid, 86% yield.

$[\alpha]_D^{22.0} = -71.33$  (c 0.3,  $\text{CHCl}_3$ )

$^1\text{H NMR}$  (400 MHz, Chloroform-*d*)  $\delta$  7.66 (d,  $J = 7.4$  Hz, 2H), 7.62 (dd,  $J = 3.6, 0.8$  Hz, 1H), 7.51 – 7.41 (m, 3H), 7.33 (dt,  $J = 14.0, 7.6$  Hz, 4H), 7.28 – 7.19 (m, 2H), 7.06 (dd,  $J = 4.9, 3.8$  Hz, 1H), 5.47 (t,  $J = 9.4$  Hz, 1H), 4.30 – 4.18 (m, 2H), 2.68 (s, 1H).

$^{13}\text{C NMR}$  (101 MHz,  $\text{CDCl}_3$ )  $\delta$  162.32, 145.95, 144.26, 131.11, 130.34, 130.06, 128.45, 128.31, 127.70, 127.22, 127.18, 127.05, 125.88, 78.33, 73.48, 69.73.

HRMS-ESI;  $m/z$   $[\text{M}+\text{H}^+] = 336.1058$ , calcd. For  $\text{C}_{20}\text{H}_{18}\text{NO}_2\text{S}$ : 336.1053.

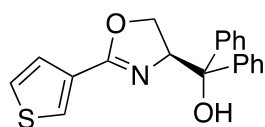

**(S)-diphenyl(2-(thiophen-3-yl)-4,5-dihydrooxazol-4-yl)methanol**

White solid, 90% yield.

$[\alpha]_D^{22.0} = -62.67$  (c 0.3,  $\text{CHCl}_3$ )



$^1\text{H}$  NMR (400 MHz, Chloroform-*d*)  $\delta$  7.90 (dd,  $J$  = 3.0, 1.1 Hz, 1H), 7.70 – 7.64 (m, 2H), 7.52 – 7.44 (m, 3H), 7.38 – 7.19 (m, 7H), 5.47 (t,  $J$  = 9.4 Hz, 1H), 4.27 – 4.15 (m, 2H), 2.62 (s, 1H).

$^{13}\text{C}$  NMR (101 MHz,  $\text{CDCl}_3$ )  $\delta$  163.07, 146.13, 144.26, 129.83, 129.55, 128.46, 128.33, 127.69, 127.21, 127.10, 127.04, 126.13, 125.85, 78.32, 73.27, 69.20.

HRMS-ESI;  $m/z$  [ $\text{M}+\text{H}^+$ ] = 336.1043, calcd. For  $\text{C}_{20}\text{H}_{18}\text{NO}_2\text{S}$ : 336.1053.

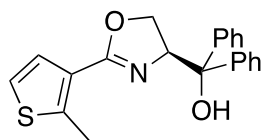

**(S)-2-(2-methylthiophen-3-yl)-4,5-dihydrooxazol-4-yl)diphenylmethanol**

White solid, 87% yield.

$[\alpha]_{\text{D}}^{22.0} = -56.00$  (c 0.3,  $\text{CHCl}_3$ )

$^1\text{H}$  NMR (400 MHz, Chloroform-*d*)  $\delta$  7.69 – 7.63 (m, 2H), 7.47 (dd,  $J$  = 8.5, 0.9 Hz, 2H), 7.36 – 7.29 (m, 5H), 7.26 – 7.19 (m, 2H), 6.98 (d,  $J$  = 5.4 Hz, 1H), 5.43 (t,  $J$  = 9.4 Hz, 1H), 4.24 – 4.11 (m, 2H), 2.66 (s, 3H), 2.60 (s, 1H).

$^{13}\text{C}$  NMR (101 MHz,  $\text{CDCl}_3$ )  $\delta$  163.85, 146.25, 145.65, 144.34, 129.00, 128.42, 128.20, 127.28, 127.13, 127.03, 125.98, 125.02, 121.51, 78.34, 73.30, 68.69, 15.57.

HRMS-ESI;  $m/z$  [ $\text{M}+\text{H}^+$ ] = 350.1214, calcd. For  $\text{C}_{21}\text{H}_{20}\text{NO}_2\text{S}$ : 350.1209.

**General procedure for the preparation of the phosphite–oxazoline ligands:**

To a solution of  $\text{PCl}_3$  (0.3 mL, 2.5 mmol) and pyridine (0.5 mL, 5.8 mmol) in toluene (5 mL) was added the solution of Binol (172 mg, 0.6 mmol) and pyridine (0.5 mL, 5.8 mmol) in toluene (5 mL) at 0 °C under argon, the resulting mixture was stirred at 0 °C for 30 min and then stirred overnight at 80 °C. The reaction was cooled to room temperature and the pyridine salt was removed by filtration under argon, evaporation of the solvent gave the phosphorochloridite as a white foam, which was used directly for next step without purification. The corresponding phosphorochloridite was dissolved in toluene (5 mL) and pyridine (0.5 mL, 5.8 mmol) was added. The corresponding hydroxyl-oxazoline compound (0.5 mmol) was azeotropically dried with toluene and then dissolved in toluene (5.0 mL) to which pyridine (0.5 mL, 5.8 mmol) was added. The oxazoline solution was transferred slowly at 0 °C to the solution of phosphorochloridite. The reaction mixture was stirred overnight at 80 °C, and the pyridine salts were removed by filtration. Evaporation of the solvent gave a white foam, which was purified by flash chromatography on neutral alumina eluting with 1 % triethylamine in toluene to produce the corresponding ligand.

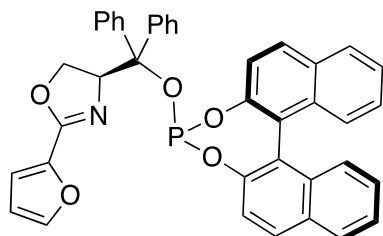

**(4S)-4-(((11bS)-dinaphtho[2,1-*d'*:1',2'-*f*][1,3,2]dioxaphosphin-4-yl)oxy)**

**diphenylmethyl)-2-(furan-2-yl)-4,5-dihydrooxazole**

Pale yellow solid, 0.199 g, 63% yield.

$[\alpha]_{\text{D}}^{22.0} = +79.00$  (c 0.1,  $\text{CHCl}_3$ )

$^{31}\text{P}$  NMR (162 MHz, Toluene-*d*<sub>8</sub>)  $\delta$  150.79.

$^1\text{H}$  NMR (400 MHz, Toluene-*d*<sub>8</sub>)  $\delta$  7.88 (d,  $J$  = 7.5 Hz, 2H), 7.74 (q,  $J$  = 8.8 Hz, 2H), 7.64 (d,  $J$  = 8.1 Hz, 1H), 7.54 – 7.39 (m, 3H), 7.31 – 7.15 (m, 6H), 7.14 – 6.94 (m, 3H), 6.94 – 6.80 (m, 7H), 5.79 (dd,  $J$  = 3.4, 1.7 Hz, 1H), 5.31 (t,  $J$  = 9.3 Hz, 1H), 4.37 (t,  $J$  = 8.6 Hz, 1H), 3.86 (t,  $J$  = 9.4 Hz, 1H).

$^{13}\text{C}$  NMR (100 MHz, Toluene- $d_8$ ):  $\delta$  159.37, 149.44, 149.39, 148.51, 148.49, 145.30, 144.47, 144.02, 143.60, 133.40-122.27 (other aromatic carbons), 115.31, 111.54, 86.03 (d,  $J = 7.9$  Hz), 73.45, 69.26.  
HRMS-ESI;  $m/z$  [ $\text{M}+\text{Na}^+$ ] = 656.1590, calcd. For  $\text{C}_{40}\text{H}_{28}\text{NNaO}_5\text{P}$ : 656.1597.

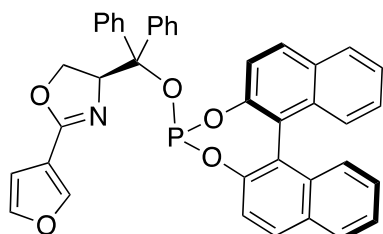

**(4S)-4-(((11bS)-dinaphtho[2,1- $d$ :1',2'- $f$ ][1,3,2]dioxaphosphepin-4-yl)oxy) diphenylmethyl)-2-(furan-3-yl)-4,5-dihydrooxazole**

White solid, 0.208 g, 66% yield

$[\alpha]_{\text{D}}^{22.0} = +197.00$  (c 0.1,  $\text{CHCl}_3$ )

$^{31}\text{P}$  NMR (162 MHz, Toluene- $d_8$ )  $\delta$  150.77.

$^1\text{H}$  NMR (400 MHz, Toluene- $d_8$ )  $\delta$  7.88 (d,  $J = 7.7$  Hz, 2H), 7.77 (s, 1H), 7.70 (q,  $J = 8.8$  Hz, 2H), 7.65 (d,  $J = 8.1$  Hz, 1H), 7.54 – 7.41 (m, 3H), 7.29 (d,  $J = 8.5$  Hz, 1H), 7.21 (t,  $J = 8.1$  Hz, 5H), 7.14 – 6.94 (m, 3H), 6.91 – 6.80 (m, 5H), 6.70 (dt,  $J = 3.4, 1.6$  Hz, 2H), 5.28 (t,  $J = 9.3$  Hz, 1H), 4.34 (t,  $J = 8.6$  Hz, 1H), 3.83 (dd,  $J = 10.0, 8.8$  Hz, 1H).

$^{13}\text{C}$  NMR (100 MHz, Toluene- $d_8$ )  $\delta$  162.45, 149.41, 149.36, 148.52, 145.22, 144.52, 143.78, 133.40-122.27 (other aromatic carbons), 116.72, 110.19, 86.00 (d,  $J = 7.6$  Hz), 73.15, 69.03.

HRMS-ESI;  $m/z$  [ $\text{M}+\text{Na}^+$ ] = 656.1591, calcd. For  $\text{C}_{40}\text{H}_{28}\text{NNaO}_5\text{P}$ : 656.1597.

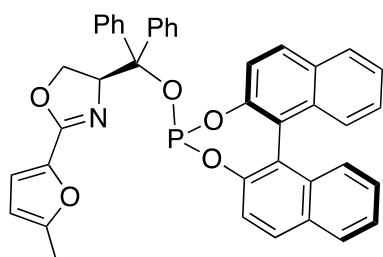

**(4S)-4-(((11bS)-dinaphtho[2,1- $d$ :1',2'- $f$ ][1,3,2]dioxaphosphepin-4-yl)oxy) diphenylmethyl)-2-(5-methylfuran-2-yl)-4,5-dihydrooxazole**

Pale yellow solid, 0.171 g, 53% yield.

$[\alpha]_{\text{D}}^{22.0} = +35.00$  (c 0.1,  $\text{CHCl}_3$ )

$^{31}\text{P}$  NMR (162 MHz, Toluene- $d_8$ )  $\delta$  150.76.

$^1\text{H}$  NMR (400 MHz, Toluene- $d_8$ )  $\delta$  7.90 (d,  $J = 7.7$  Hz, 1H), 7.76 (dd,  $J = 27.3, 8.8$  Hz, 1H), 7.65 (d,  $J = 8.1$  Hz, 1H), 7.53 – 7.40 (m, 1H), 7.26 (d,  $J = 8.4$  Hz, 1H), 7.19 (dd,  $J = 12.4, 5.5$  Hz, 2H), 7.13 – 6.92 (m, 7H), 6.90 – 6.78 (m, 5H), 5.54 (dd,  $J = 3.3, 0.9$  Hz, 1H), 5.34 (t,  $J = 9.3$  Hz, 1H), 4.39 (t,  $J = 8.6$  Hz, 1H), 3.89 (t,  $J = 9.3$  Hz, 1H), 1.71 (s, 3H).

$^{13}\text{C}$  NMR (100 MHz, Toluene- $d_8$ )  $\delta$  159.44, 155.99, 149.49, 149.44, 148.55, 148.53, 144.57, 142.46, 137.79, 133.39-122.30 (other aromatic carbons), 116.68, 108.17, 86.06 (d,  $J = 7.8$  Hz), 73.53, 69.10, 13.27.

HRMS-ESI;  $m/z$  [ $\text{M}+\text{H}^+$ ] = 648.1933, calcd. For  $\text{C}_{41}\text{H}_{31}\text{NO}_5\text{P}$ : 648.1934.

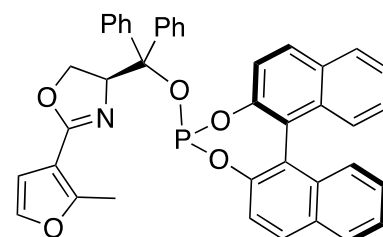

**(4S)-4-(((11bS)-dinaphtho[2,1- $d$ :1',2'- $f$ ][1,3,2]dioxaphosphepin-4-yl)oxy) diphenylmethyl)-2-(2-methylfuran-3-yl)-4,5-dihydrooxazole**

White solid, 0.213 g, 66% yield.

$[\alpha]_{\text{D}}^{22.0} = +144.00$  (c 0.1,  $\text{CHCl}_3$ )

$^{31}\text{P}$  NMR (162 MHz, Toluene- $d_8$ )  $\delta$  150.53.

$^1\text{H}$  NMR (400 MHz, Toluene- $d_8$ )  $\delta$  7.90 (d,  $J = 7.5$  Hz, 2H), 7.71 (q,  $J = 8.8$  Hz, 2H), 7.65 (d,  $J = 8.1$  Hz, 1H), 7.55 – 7.39 (m, 3H), 7.32 – 7.18 (m, 6H), 7.15 – 6.98 (m, 3H), 6.92

– 6.79 (m, 5H), 6.72 (dd,  $J = 4.5, 1.9$  Hz, 2H), 5.29 (t,  $J = 9.3$  Hz, 1H), 4.33 (t,  $J = 8.6$  Hz, 1H), 3.83 (t,  $J = 9.4$  Hz, 1H), 2.51 (s, 3H).

$^{13}\text{C}$  NMR (100 MHz, Toluene- $d_8$ )  $\delta$  163.52, 156.94, 149.46, 149.41, 148.53, 144.63, 140.64, 133.41-122.29 (other aromatic carbons) 110.91, 86.04(d,  $J=7.7$  Hz), 73.24, 68.62, 13.75.

HRMS-ESI;  $m/z$  [ $\text{M}+\text{H}^+$ ] = 648.1926, calcd. For  $\text{C}_{41}\text{H}_{31}\text{NO}_5\text{P}$ : 648.1934.

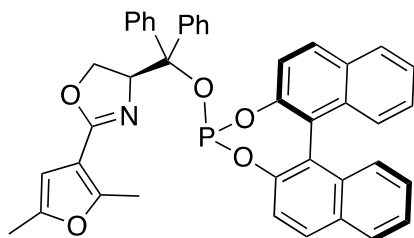

**(4S)-2-(2,5-dimethylfuran-3-yl)-4-(((11bS)-dinaphtho[2,1- $d'$ :1',2'-f][1,3,2]dioxaphosphopin-4-yl)oxy)diphenylmethyl)-4,5-dihydrooxazole**

Pale yellow solid, 0.237 g, 72% yield.

$[\alpha]_{\text{D}}^{22.0} = +130.00$  (c 0.1,  $\text{CHCl}_3$ )

$^{31}\text{P}$  NMR (162 MHz, Toluene- $d_8$ )  $\delta$  150.50.

$^1\text{H}$  NMR (400 MHz, Toluene- $d_8$ )  $\delta$  7.92 (d,  $J = 7.5$  Hz,

2H), 7.74 (s, 2H), 7.65 (d,  $J = 8.1$  Hz, 1H), 7.54 – 7.40 (m, 3H), 7.29 – 7.17 (m, 6H), 7.13 – 6.99 (m, 3H), 6.91 – 6.77 (m, 5H), 6.38 (s, 1H), 5.30 (t,  $J = 9.4$  Hz, 1H), 4.34 (t,  $J = 8.6$  Hz, 1H), 3.84 (dd,  $J = 10.0, 8.7$  Hz, 1H), 2.54 (s, 3H), 1.75 (s, 3H).

$^{13}\text{C}$  NMR (100 MHz, Toluene- $d_8$ ) 163.84, 155.18, 150.18, 149.52, 149.47, 148.60, 144.72, 133.42-122.31 (other aromatic carbons), 111.37, 106.84, 86.07(d,  $J=7.5$  Hz), 73.19, 68.57, 13.83, 12.85.

HRMS-ESI;  $m/z$  [ $\text{M}+\text{H}^+$ ] = 662.2093, calcd. For  $\text{C}_{42}\text{H}_{33}\text{NO}_5\text{P}$ : 662.2091.

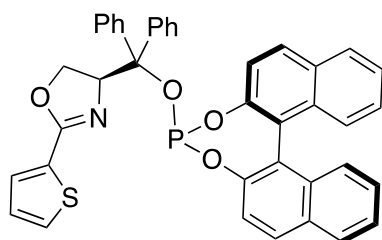

**(4S)-4-(((11bS)-dinaphtho[2,1- $d'$ :1',2'-f][1,3,2]dioxaphosphopin-4-yl)oxy)diphenylmethyl)-2-(thiophen-2-yl)-4,5-dihydrooxazole**

Pale yellow solid, 0.201 g, 62% yield.

$[\alpha]_{\text{D}}^{22.0} = +117.00$  (c 0.1,  $\text{CHCl}_3$ )

$^{31}\text{P}$  NMR (162 MHz, Toluene- $d_8$ )  $\delta$  150.89.

$^1\text{H}$  NMR (400 MHz, Toluene- $d_8$ )  $\delta$  7.88 (d,  $J = 7.6$  Hz, 2H), 7.76 – 7.70 (m, 2H), 7.67 – 7.60 (m, 2H), 7.53 – 7.39 (m, 3H), 7.30 – 7.15 (m, 6H), 7.13 – 6.94 (m, 11H), 6.92 – 6.76 (m, 5H), 6.64 (dd,  $J = 5.0, 1.0$  Hz, 1H), 6.45 (dd,  $J = 4.9, 3.8$  Hz, 1H), 5.32 (dd,  $J = 9.7, 8.8$  Hz, 1H), 4.41 (t,  $J = 8.5$  Hz, 1H), 3.89 (dd,  $J = 9.9, 8.8$  Hz, 1H).

$^{13}\text{C}$  NMR (100 MHz, Toluene- $d_8$ )  $\delta$  162.86, 149.41, 149.36, 148.50, 148.48, 144.44, 133.37-122.26 (other aromatic carbons), 86.06(d,  $J=7.6$  Hz), 73.49, 69.70.

HRMS-ESI;  $m/z$  [ $\text{M}+\text{H}^+$ ] = 650.1547, calcd. For  $\text{C}_{40}\text{H}_{29}\text{NO}_4\text{PS}$ : 650.1549.

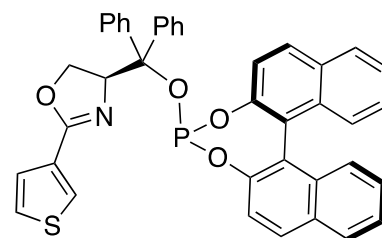

**(4S)-4-(((11bS)-dinaphtho[2,1- $d'$ :1',2'-f][1,3,2]dioxaphosphopin-4-yl)oxy)diphenylmethyl)-2-(thiophen-3-yl)-4,5-dihydrooxazole**

Pale yellow solid, 0.223 g, 69% yield.

$[\alpha]_{\text{D}}^{22.0} = +71.00$  (c 0.1,  $\text{CHCl}_3$ )

$^{31}\text{P}$  NMR (162 MHz, Toluene- $d_8$ )  $\delta$  150.87.

$^1\text{H}$  NMR (400 MHz, Toluene- $d_8$ )  $\delta$  7.88 (d,  $J = 7.5$  Hz, 2H), 7.76 – 7.62 (m, 4H), 7.55 (dd,  $J = 5.1, 1.0$  Hz, 1H), 7.52 – 7.38 (m, 3H), 7.22 (ddd,  $J = 15.6, 8.1, 3.5$  Hz, 6H), 7.14

– 6.95 (m, 3H), 6.93 – 6.77 (m, 5H), 6.54 (dd,  $J = 5.1, 3.0$  Hz, 1H), 5.31 (dd,  $J = 9.9, 8.8$  Hz, 1H), 4.37 (t,  $J = 8.7$  Hz, 1H), 3.87 (dd,  $J = 10.1, 8.7$  Hz, 1H).

$^{13}\text{C}$  NMR (100 MHz, Toluene- $d_8$ )  $\delta$  163.48, 149.40, 149.35, 148.52, 148.50, 144.54, 143.86, 137.79, 133.40-122.24 (other aromatic carbons), 86.03 (d,  $J = 7.6$  Hz), 73.31, 69.19.

HRMS-ESI;  $m/z$  [ $\text{M}+\text{H}^+$ ] = 650.1541, calcd. For  $\text{C}_{40}\text{H}_{29}\text{NO}_4\text{PS}$ : 650.1549.

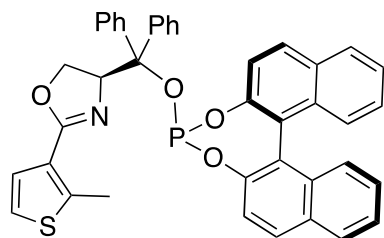

**(4S)-4-(((11bS)-dinaphtho[2,1- $d$ :1',2'- $f$ ][1,3,2]dioxaphosphepin-4-yl)oxy) diphenylmethyl)-2-(2-methylthiophen-3-yl)-4,5-dihydrooxazole**

Pale yellow solid, 0.251 mg, 76% yield.

$[\alpha]_{\text{D}}^{22.0} = +110.00$  (c 0.1,  $\text{CHCl}_3$ )

$^{31}\text{P}$  NMR (162 MHz, Toluene- $d_8$ )  $\delta$  150.43.

$^1\text{H}$  NMR (400 MHz, Toluene- $d_8$ )  $\delta$  7.90 (d,  $J = 7.4$  Hz, 2H), 7.74 – 7.60 (m, 3H), 7.54 – 7.39 (m, 4H), 7.22 (dt,  $J = 8.5, 7.4$  Hz, 6H), 7.15 – 6.94 (m, 3H), 6.91 – 6.77 (m, 5H), 6.44 (d,  $J = 5.4$  Hz, 1H), 5.29 (t,  $J = 9.5$  Hz, 1H), 4.33 (t,  $J = 8.7$  Hz, 1H), 3.82 (dd,  $J = 10.1, 8.7$  Hz, 1H), 2.71 (s, 3H).

$^{13}\text{C}$  NMR (100 MHz, Toluene- $d_8$ )  $\delta$  164.13, 149.42, 149.37, 148.50, 146.28, 144.63, 137.79, 133.40-121.35 (other aromatic carbons), 86.02 (d,  $J = 7.6$  Hz), 73.56, 68.34, 15.70, 15.67.

HRMS-ESI;  $m/z$  [ $\text{M}+\text{H}^+$ ] = 664.1713, calcd. For  $\text{C}_{41}\text{H}_{31}\text{NO}_4\text{PS}$ : 664.1706.

**Typical procedure for the preparation of [Ir(cod)(L)]-BARF.**

The corresponding ligand (0.116 mmol) was dissolved in  $\text{CH}_2\text{Cl}_2$  (2 mL) and  $[\text{Ir}(\text{COD})\text{Cl}]_2$  (38 mg, 0.058 mmol) was added. The reaction was refluxed at 50 °C for 1 h. After 5 min at room temperature, NaBARF (114 mg, 0.128 mmol) and water (2 mL) were added and the reaction mixture was stirred vigorously for 30 min at room temperature. The phases were separated and the aqueous phase was extracted twice with  $\text{CH}_2\text{Cl}_2$ . The combined organic phases were filtered through a Celite plug, dried with  $\text{Na}_2\text{SO}_4$  and the solvent was evaporated to give the product as an orange solid.

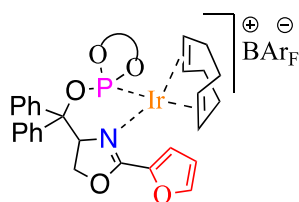

**[Ir(cod)(L1a)]BARF.**

Orange solid, 0.198 g, 95% yield.

$[\alpha]_{\text{D}}^{22.0} = +60.00$  (c 0.1,  $\text{CHCl}_3$ )

$^{31}\text{P}$  NMR ( $\text{CDCl}_3$ , 162 MHz):  $\delta$  113.12.

$^1\text{H}$  NMR (400 MHz, Chloroform- $d$ )  $\delta$  8.04 (t,  $J = 8.2$  Hz, 2H), 7.97 (dd,  $J = 8.5, 3.5$  Hz, 2H), 7.80 – 7.68 (m, 11H), 7.62 – 7.47 (m, 9H), 7.36 (m, 5H), 7.17 (m, 4H), 7.07 (d,  $J = 8.8$  Hz, 1H), 6.90 (dd,  $J = 6.1, 2.5$  Hz, 2H), 6.21 – 6.18 (m, 1H), 5.93 (t,  $J = 10.7$  Hz, 1H), 5.51 – 5.40 (m, 1H), 5.36 – 5.30 (m, 1H), 4.46 (t,  $J = 9.8$  Hz, 1H), 4.32 – 4.23 (m, 1H), 3.97 – 3.86 (m, 1H), 3.36 – 3.29 (m, 1H), 2.37 (s, 3H), 2.21 – 1.78 (m, 6H), 1.67 – 1.47 (m, 2H).

$^{13}\text{C}$  NMR (101 MHz,  $\text{CDCl}_3$ )  $\delta$  162.41, 161.84 (q,  $J = 49.8$  Hz), 149.44, 146.49, 146.41, 146.27, 146.15, 144.00, 139.41, 139.33, 138.67, 134.95, 132.70-119.40 (other aromatic carbons), 117.61, 113.49, 103.72, 103.55, 102.12, 101.96, 88.32, 71.29,

70.31, 63.36, 61.04, 33.05 (d,  $J = 3.8$  Hz), 31.40 (d,  $J = 3.6$  Hz), 28.29 (d,  $J = 2.6$  Hz), 27.74 (d,  $J = 1.8$  Hz).

HRMS-ESI;  $m/z$   $[C_{48}H_{40}IrNO_5P]^+ = 934.2269$ , calcd. For  $[C_{48}H_{40}IrNO_5P]^+$ : 934.2271.

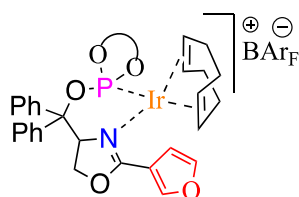

**[Ir(cod)(L1a)]BARf.**

Orange solid, 0.179 g, 86% yield.

$[\alpha]_D^{22.0} = +53.00$  (c 0.1,  $CHCl_3$ )

$^{31}P$  NMR ( $CDCl_3$ , 162 MHz):  $\delta$  113.70.

$^1H$  NMR (400 MHz, Chloroform- $d$ )  $\delta$  8.63 (d,  $J = 0.5$  Hz, 1H), 8.10 – 8.02 (m, 2H), 7.97 (dd,  $J = 8.6, 3.3$  Hz, 2H), 7.75 (dd,  $J = 12.2, 4.8$  Hz, 10H), 7.64 – 7.50 (m, 9H), 7.47 – 7.33 (m, 5H), 7.21 – 7.13 (m, 5H), 7.05 (dd,  $J = 8.8, 0.8$  Hz, 1H), 6.93 – 6.84 (m, 2H), 5.91 (dd,  $J = 11.9, 10.1$  Hz, 1H), 5.36 – 5.24 (m, 1H), 5.02 – 4.88 (m, 1H), 5.01 – 4.91 (m, 1H), 4.43 (t,  $J = 10.0$  Hz, 1H), 4.28 (dd,  $J = 12.0, 10.0$  Hz, 1H), 3.91 (dt,  $J = 9.9, 3.4$  Hz, 1H), 3.43 – 3.32 (m, 1H), 2.16 – 1.92 (m, 3H), 1.77 (dt,  $J = 22.9, 11.8$  Hz, 4H), 1.54 – 1.41 (m, 1H).

$^{13}C$  NMR (101 MHz,  $CDCl_3$ )  $\delta$  167.62, 161.83 (q,  $J = 49.9$  Hz), 149.46, 146.36, 144.99, 143.84, 143.80, 139.14, 139.06, 134.96, 132.02-119.23 (other aromatic carbons), 117.65, 117.61, 117.58, 111.92, 110.66, 102.88, 102.72, 101.07, 100.90, 88.27, 88.24, 71.38, 69.87, 64.68, 62.06, 33.49 (d,  $J = 3.9$  Hz), 31.22 (d,  $J = 3.9$  Hz), 28.14 (d,  $J = 2.9$  Hz), 27.64 (d,  $J = 2.7$  Hz).

HRMS-ESI;  $m/z$   $[C_{48}H_{40}IrNO_5P]^+ = 934.2291$ , calcd. For  $[C_{48}H_{40}IrNO_5P]^+$ : 934.2271.

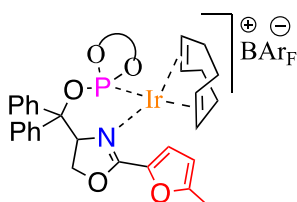

**[Ir(cod)(L1a)]BARf.**

Orange solid, 0.192 g, 92% yield.

$[\alpha]_D^{22.0} = +48.00$  (c 0.1,  $CHCl_3$ )

$^{31}P$  NMR ( $CDCl_3$ , 162 MHz):  $\delta$  113.12.

$^1H$  NMR (400 MHz, Chloroform- $d$ )  $\delta$  8.04 (t,  $J = 8.2$  Hz, 2H), 7.97 (dd,  $J = 8.5, 3.5$  Hz, 2H), 7.80 – 7.68 (m, 11H), 7.62 – 7.47 (m, 9H), 7.36 (m, 5H), 7.17 (m, 4H), 7.07 (d,  $J = 8.8$  Hz, 1H), 6.90 (dd,  $J = 6.1, 2.5$  Hz, 2H), 6.21 – 6.18 (m, 1H), 5.93 (t,  $J = 10.7$  Hz, 1H), 5.51 – 5.40 (m, 1H), 5.36 – 5.30 (m, 1H), 4.46 (t,  $J = 9.8$  Hz, 1H), 4.32 – 4.23 (m, 1H), 3.97 – 3.86 (m, 1H), 3.36 – 3.29 (m, 1H), 2.37 (s, 3H), 2.21 – 1.78 (m, 6H), 1.67 – 1.47 (m, 2H).

$^{13}C$  NMR (101 MHz,  $CDCl_3$ )  $\delta$  162.27, 161.85 (q,  $J = 49.8$  Hz), 146.61, 146.53, 146.36, 146.24, 144.08, 144.05, 139.58, 139.50, 137.11, 134.97-117.60 (other aromatic carbons), 110.57, 103.38, 103.20, 102.46, 102.30, 88.31, 71.06, 70.30, 63.14, 61.05, 34.23 (d,  $J = 4.0$  Hz), 30.61 (d,  $J = 3.5$  Hz), 28.16 (d,  $J = 2.3$  Hz), 27.49 (d,  $J = 2.8$  Hz), 14.30.

HRMS-ESI;  $m/z$   $[C_{49}H_{42}IrNO_5P]^+ = 948.2444$ , calcd. For  $[C_{49}H_{42}IrNO_5P]^+$ : 948.2428.

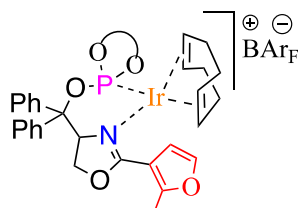

**[Ir(cod)(L1a)]BARf.**

Orange solid, 0.196 g, 94% yield.

$[\alpha]_D^{22.0} = +58.00$  (c 0.1,  $CHCl_3$ )

$^{31}P$  NMR ( $CDCl_3$ , 162 MHz):  $\delta$  113.56.

$^1H$  NMR (400 MHz, Chloroform- $d$ )  $\delta$  8.05 (t,  $J = 9.0$  Hz, 2H), 7.97 (dd,  $J = 8.6, 2.4$  Hz, 2H), 7.83 (d,  $J = 2.0$  Hz, 1H), 7.78 – 7.69 (m, 10H), 7.61 – 7.48 (m, 9H), 7.43 – 7.34 (m, 4H), 7.21 – 7.14 (m, 4H), 7.10 (d,  $J = 8.8$  Hz, 1H), 6.92 – 6.86 (m, 2H), 5.89 (dd,  $J = 12.2, 9.8$  Hz, 1H), 5.34 – 5.25 (m, 1H),

4.97 – 4.87 (m, 1H), 4.51 (t,  $J = 9.8$  Hz, 1H), 4.30 (dd,  $J = 12.2, 9.9$  Hz, 1H), 3.94 – 3.86 (m, 1H), 3.40 – 3.32 (m, 1H), 2.49 (s, 3H), 2.15 – 1.93 (m, 3H), 1.87 – 1.63 (m, 4H), 1.52 – 1.40 (m, 1H).

$^{13}\text{C}$  NMR (101 MHz,  $\text{CDCl}_3$ )  $\delta$  162.26, 161.85 (q,  $J = 49.8$  Hz), 146.61, 146.53, 146.37, 146.25, 144.09, 144.05, 139.58, 139.50, 137.12, 134.96, 132.71-119.50 (other aromatic carbons), 117.61, 117.57, 110.57, 103.38, 103.21, 102.47, 102.31, 88.29, 71.07, 70.31, 63.15, 61.05, 34.24 (d,  $J = 4.1$  Hz), 30.62 (d,  $J = 3.2$  Hz), 28.16 (d,  $J = 2.3$  Hz), 27.49 (d,  $J = 2.5$  Hz), 14.30.

HRMS-ESI;  $m/z$   $[\text{C}_{49}\text{H}_{42}\text{IrNO}_5\text{P}]^+ = 948.2443$ , calcd. For  $[\text{C}_{49}\text{H}_{42}\text{IrNO}_5\text{P}]^+$ : 948.2428.

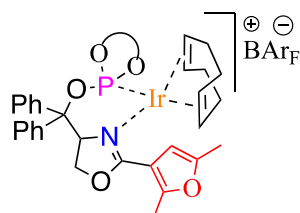

**[Ir(cod)(L1a)]BARf.**

Orange solid, 0.205 g, 97% yield.

$[\alpha]_{\text{D}}^{22.0} = +57.00$  (c 0.1,  $\text{CHCl}_3$ )

$^{31}\text{P}$  NMR ( $\text{CDCl}_3$ , 162 MHz):  $\delta$  113.42.

$^1\text{H}$  NMR (400 MHz, Chloroform- $d$ )  $\delta$  8.10 – 7.96 (m, 4H), 7.73 (s, 10H), 7.62 – 7.47 (m, 10H), 7.44 – 7.35 (m, 4H), 7.22 – 7.10 (m, 5H), 6.94 – 6.85 (m, 2H), 5.87 (dd,  $J = 12.2, 9.8$  Hz, 1H), 5.35 – 5.27 (m, 1H), 5.00 – 4.92 (m, 1H), 4.48 (t,  $J = 9.8$  Hz, 1H), 4.27 (dd,  $J = 12.2, 9.9$  Hz, 1H), 3.96 – 3.87 (m, 1H), 3.39 – 3.31 (m, 1H), 2.45 (s, 3H), 2.22 (s, 3H), 2.08 – 1.73 (m, 6H), 1.71 – 1.60 (m, 1H), 1.52 – 1.41 (m, 1H).

$^{13}\text{C}$  NMR (101 MHz,  $\text{CDCl}_3$ )  $\delta$  168.70, 161.70 (q,  $J = 49.9$  Hz), 160.96, 159.57, 151.84, 146.57, 146.49, 146.36, 146.24, 143.84, 139.35, 139.27, 134.83, 132.65-119.42 (other aromatic carbons), 117.45, 108.24, 106.91, 103.00, 102.83, 101.50, 101.33, 87.75, 71.48, 69.21, 64.13, 61.11, 33.47 (d,  $J = 3.9$  Hz), 30.97 (s), 27.85 (d,  $J = 2.3$  Hz), 27.74 (d,  $J = 1.0$  Hz), 14.29, 13.07.

HRMS-ESI;  $m/z$   $[\text{C}_{50}\text{H}_{44}\text{IrNO}_5\text{P}]^+ = 962.2569$ , calcd. For  $[\text{C}_{50}\text{H}_{44}\text{IrNO}_5\text{P}]^+$ : 962.2584.

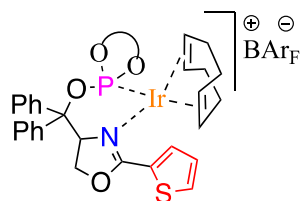

**[Ir(cod)(L1a)]BARf.**

Orange solid, 0.191 g, 91% yield.

$[\alpha]_{\text{D}}^{22.0} = +48.00$  (c 0.1,  $\text{CHCl}_3$ )

$^{31}\text{P}$  NMR ( $\text{CDCl}_3$ , 162 MHz):  $\delta$  112.67.

$^1\text{H}$  NMR (400 MHz, Chloroform- $d$ )  $\delta$  8.24 (dd,  $J = 3.9, 1.2$  Hz, 1H), 8.06 – 7.94 (m, 4H), 7.81 – 7.67 (m, 11H), 7.62 – 7.47 (m, 9H), 7.42 – 7.30 (m, 4H), 7.22 – 7.15 (m, 4H), 7.12 (dd,  $J = 4.9, 3.9$  Hz, 1H), 7.01 (dd,  $J = 8.8, 0.9$  Hz, 1H), 6.89 (dd,  $J = 6.8, 2.9$  Hz, 2H), 5.98 (dd,  $J = 11.6, 10.1$  Hz, 1H), 5.45 – 5.36 (m, 1H), 4.93 – 4.84 (m, 1H), 4.56 – 4.48 (m, 1H), 4.31 (dd,  $J = 11.6, 10.0$  Hz, 1H), 4.16 – 4.08 (m, 1H), 3.57 – 3.48 (m, 1H), 2.32 – 2.22 (m, 1H), 2.12 – 2.02 (m, 1H), 1.98 – 1.82 (m, 3H), 1.77 – 1.61 (m, 2H), 1.51 – 1.40 (m, 1H).  $^{13}\text{C}$  NMR (101 MHz,  $\text{CDCl}_3$ )  $\delta$  167.47, 161.84 (q,  $J = 49.9$  Hz), 146.52, 146.43, 146.40, 146.28, 144.08, 144.05, 139.50, 139.42, 137.55, 136.82, 134.96, 132.73-119.32 (other aromatic carbons), 117.61, 117.58, 102.80, 102.64, 102.39, 102.21, 88.75, 71.82, 70.36, 65.89, 63.46, 34.33 (d,  $J = 4.7$  Hz), 30.50 (d,  $J = 3.3$  Hz), 28.31 (d,  $J = 1.9$  Hz), 27.41 (d,  $J = 3.1$  Hz).

HRMS-ESI;  $m/z$   $[\text{C}_{48}\text{H}_{40}\text{IrNO}_4\text{PS}]^+ = 950.2039$ , calcd. For  $[\text{C}_{48}\text{H}_{40}\text{IrNO}_4\text{PS}]^+$ : 950.2041.

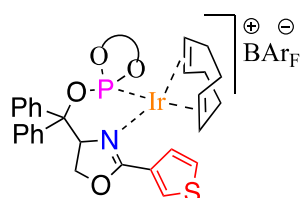

**[Ir(cod)(L1a)]BARf.**

Orange solid, 0.198 g, 94% yield.

$[\alpha]_D^{22.0} = +62.00$  (c 0.1, CHCl<sub>3</sub>)

<sup>31</sup>P NMR (CDCl<sub>3</sub>, 162 MHz): δ 113.08.

<sup>1</sup>H NMR (400 MHz, Chloroform-*d*) δ 8.86 (dd, *J* = 3.0, 1.1 Hz, 1H), 8.04 (dd, *J* = 8.5, 5.8 Hz, 2H), 7.98 (dd, *J* = 8.6, 3.9 Hz, 2H), 7.92 (dd, *J* = 5.2, 1.2 Hz, 1H), 7.81 – 7.68 (m, 10H), 7.63 – 7.48 (m, 9H), 7.44 – 7.33 (m, 5H), 7.18 (dd, *J* = 7.5, 2.8 Hz, 4H), 7.07 (d, *J* = 8.8 Hz, 1H), 6.89 (dd, *J* = 6.7, 2.9 Hz, 2H), 5.94 (dd, *J* = 12.4, 9.9 Hz, 1H), 5.33 – 5.23 (m, 1H), 4.82 – 4.68 (m, 1H), 4.45 (t, *J* = 9.9 Hz, 1H), 4.31 (dd, *J* = 12.4, 10.0 Hz, 1H), 3.98 – 3.88 (m, 1H), 3.42 (td, *J* = 7.1, 3.3 Hz, 1H), 2.18 – 1.87 (m, 3H), 1.75 (dd, *J* = 21.2, 11.8 Hz, 4H), 1.52 – 1.39 (m, 1H).

<sup>13</sup>C NMR (101 MHz, CDCl<sub>3</sub>) δ 168.58, 161.84 (q, *J* = 50.0 Hz), 146.53, 146.45, 146.37, 146.25, 143.92, 143.88, 139.25, 139.17, 135.79, 134.97, 132.74-119.34 (other aromatic carbons), 117.62, 103.18, 103.02, 101.75, 101.58, 88.12, 71.63, 69.93, 64.79, 61.63, 33.32 (d, *J* = 4.1 Hz), 31.40 (d, *J* = 3.8 Hz), 28.23 (d, *J* = 2.9 Hz), 27.62 (d, *J* = 2.2 Hz).

HRMS-ESI; *m/z* [C<sub>48</sub>H<sub>40</sub>IrNO<sub>4</sub>PS]<sup>+</sup> = 950.2027, calcd. For [C<sub>48</sub>H<sub>40</sub>IrNO<sub>4</sub>PS]<sup>+</sup>: 950.2041.

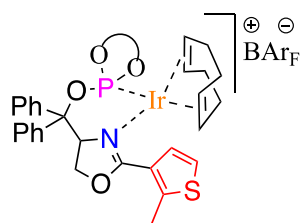

#### [Ir(cod)(L1a)]BARf.

Orange solid, 0.195 g, 92% yield.

$[\alpha]_D^{22.0} = +61.00$  (c 0.1, CHCl<sub>3</sub>)

<sup>31</sup>P NMR (CDCl<sub>3</sub>, 162 MHz): δ 112.73.

<sup>1</sup>H NMR (400 MHz, Chloroform-*d*) δ 8.51 (d, *J* = 5.5 Hz, 1H), 8.06 (dd, *J* = 12.6, 8.6 Hz, 2H), 7.98 (d, *J* = 8.9 Hz, 2H), 7.73 (s, 10H), 7.64 – 7.47 (m, 9H), 7.45 – 7.34 (m, 4H), 7.22 – 7.14 (m, 5H), 7.07 (d, *J* = 5.4 Hz, 1H), 6.91 (dd, *J* = 6.6, 2.9 Hz, 2H), 5.93 (dd, *J* = 12.9, 9.7 Hz, 1H), 5.28 – 5.20 (m, 1H), 4.64 – 4.47 (m, 2H), 4.37 (dd, *J* = 12.9, 10.0 Hz, 1H), 3.90 – 3.79 (m, 1H), 3.42 – 3.28 (m, 1H), 2.58 (s, 3H), 2.10 – 1.93 (m, 2H), 1.88 – 1.61 (m, 5H), 1.53 – 1.42 (m, 1H).

<sup>13</sup>C NMR (101 MHz, CDCl<sub>3</sub>) δ 169.83, 161.84 (q, *J* = 99.7, 49.8 Hz), 150.18, 146.66, 146.58, 146.51, 146.39, 143.75, 139.29, 139.22, 134.96, 132.72-119.43 (other aromatic carbons), 117.60, 103.56, 103.40, 101.66, 101.49, 87.59, 87.56, 71.99, 69.48, 64.25, 61.14, 33.29 (d, *J* = 3.9 Hz), 31.37 (d, *J* = 3.6 Hz), 28.08 (d, *J* = 2.2 Hz), 27.80 (d, *J* = 2.3 Hz), 15.21.

HRMS-ESI; *m/z* [C<sub>49</sub>H<sub>42</sub>IrNO<sub>4</sub>PS]<sup>+</sup> = 964.2163, calcd. For [C<sub>49</sub>H<sub>42</sub>IrNO<sub>4</sub>PS]<sup>+</sup>: 964.2198.

#### Synthesis of catalyst IC

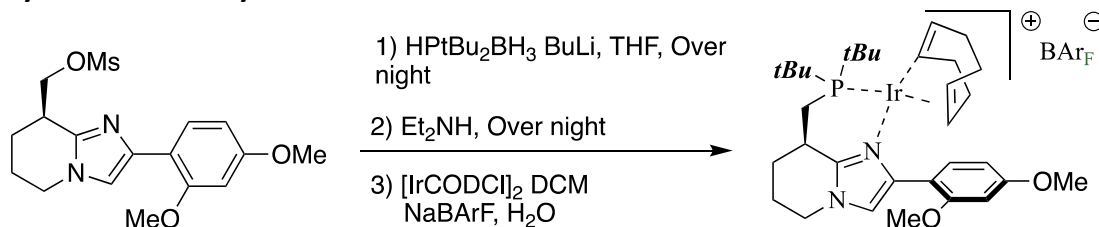

The catalyst IC was prepared following the procedures that have been reported in the group.

Peters, B. K.; Liu, J.; Margarita, C.; Rabten, W.; Kerdphon, S.; Orebom, A.; Morsch, T.; Andersson, P. G. *Journal of the American Chemical Society* **2016**, *138*, 11930.

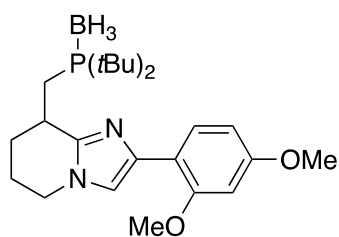

**8-((di-tert-butylphosphaneyl)methyl)-2-(2,4-dimethoxyphenyl)-5,6,7,8-tetrahydroimidazo[1,2-a]pyridine**

Yellow light oil, 115 mg, 65% yield.

$^1\text{H}$  NMR (400 MHz, Chloroform-*d*)  $\delta$  8.09 (d,  $J$  = 8.6 Hz, 1H), 7.27 (s, 1H), 6.59 (dd,  $J$  = 8.6, 2.4 Hz, 1H), 6.50 (d,  $J$  = 2.4 Hz, 1H), 4.06 – 3.98 (m, 1H), 3.96 – 3.86 (m, 1H), 3.90

(s, 3H), 3.84 (s, 3H), 3.30 – 3.11 (m, 3H), 2.75 – 2.64 (m, 0H), 2.11 – 1.91 (m, 1H), 1.60 (s, 3H), 1.44 (d,  $J$  = 12.5 Hz, 9H), 1.26 (d,  $J$  = 12.5 Hz, 9H).

$^{13}\text{C}$  NMR (101 MHz,  $\text{CDCl}_3$ )  $\delta$  158.95, 156.71, 147.07, 135.30, 127.57, 117.30, 116.38, 104.41, 98.14, 55.25, 44.75, 34.02, 33.55, 33.29, 32.57, 32.54, 31.70, 31.42, 30.04, 27.74, 27.73, 27.67, 27.66, 22.28, 22.20, 21.47, 21.17, 14.05.

HRMS-ESI;  $m/z$   $[\text{C}_{24}\text{H}_{30}\text{BN}_2\text{O}_2\text{P}-\text{BH}_3+\text{H}]^+ = 417.2659$ , calcd. For  $[\text{C}_{24}\text{H}_{30}\text{BN}_2\text{O}_2\text{P}-\text{BH}_3+\text{H}]^+$ : 417.2665.

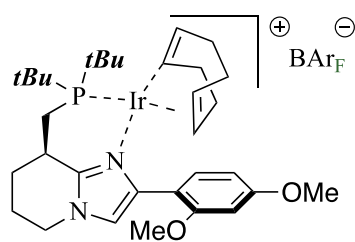

**[Ir(cod)]BARf.**

Orange solid, 257 mg, 48% yield.

$^1\text{H}$  NMR (400 MHz, Chloroform-*d*)  $\delta$  8.55 (d,  $J$  = 8.5 Hz, 1H), 7.76 – 7.66 (m, 8H), 7.52 (s, 4H), 7.36 (s, 1H), 6.65 (dd,  $J$  = 8.6, 2.4 Hz, 1H), 6.56 (d,  $J$  = 2.3 Hz, 1H), 5.20 – 5.13 (m, 1H), 4.44 – 4.34 (m, 1H), 3.98 – 3.91 (m, 2H),

3.88 (s, 3H), 3.86 (s, 3H), 3.48 – 3.28 (m, 2H), 2.52 (dtd,  $J$  = 15.8, 10.4, 5.7 Hz, 1H), 2.32 – 1.79 (m, 8H), 1.75 – 1.63 (m, 1H), 1.42 (d,  $J$  = 12.9 Hz, 9H), 1.09 (d,  $J$  = 13.4 Hz, 9H).

$^{31}\text{P}$  NMR (162 MHz,  $\text{CDCl}_3$ )  $\delta$  40.62.

$^{13}\text{C}$  NMR (101 MHz,  $\text{CDCl}_3$ )  $\delta$  162.41, 161.92, 161.43, 161.20, 160.93, 157.48, 145.28, 145.25, 134.77, 131.44, 129.44 – 128.27 (m), 125.88, 123.17, 120.68, 120.46, 117.58 – 117.28 (m), 111.61, 104.35, 98.60, 90.27, 90.20, 80.54, 80.38, 67.71, 59.89, 55.57, 55.48, 45.70, 38.04, 37.74, 37.69, 35.68, 35.49, 35.03, 35.00, 34.10, 30.14, 29.85, 29.83, 28.29, 28.21, 28.10, 24.56, 24.53, 20.00, 19.76.

HRMS-ESI;  $m/z$   $[\text{C}_{32}\text{H}_{49}\text{IrN}_2\text{O}_2\text{P}]^+ = 717.3139$ , calcd. For  $[\text{C}_{32}\text{H}_{49}\text{IrN}_2\text{O}_2\text{P}]^+$ : 717.3157.

$[\alpha]_{\text{D}}^{22.0} = +77.5$  (c 0.04,  $\text{CHCl}_3$ )





| Entry | Product                                                                             | Separation method                                                                                                      | Optical rotation                                                | ee  |
|-------|-------------------------------------------------------------------------------------|------------------------------------------------------------------------------------------------------------------------|-----------------------------------------------------------------|-----|
| 1     | 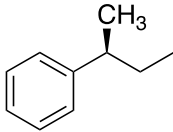   | <b>GC-MS:</b> column Chiraldex $\beta$ -3p, 50°C isothermal, $t_R = 35.2$ min (minor)/36.8 (major)                     | $[\alpha]_D^{25.0} = 22.52$<br>(c = 0.37 in CHCl <sub>3</sub> ) | 95% |
| 2     |    | <b>GC-MS:</b> column Chiraldex $\beta$ -DM, 60°C hold 30min to 175°C at 3°C/min. $t_R = 39.4$ min (major)/40.0 (minor) | $[\alpha]_D^{25.0} = 21.01$<br>(c = 0.49 in CHCl <sub>3</sub> ) | 95% |
| 3     |    | <b>GC-MS:</b> column Chiraldex $\beta$ -DM, 60°C hold 30min to 175°C at 3°C/min. $t_R = 25.9$ min (major)/28.5 (minor) | $[\alpha]_D^{25.0} = 27.17$<br>(c = 0.38 in CHCl <sub>3</sub> ) | 94% |
| 4     |  | <b>GC-MS:</b> column Chiraldex $\beta$ -DM, 60°C hold 30min to 175°C at 3°C/min. $t_R = 55.1$ min (major)/55.6 (minor) | $[\alpha]_D^{25.0} = 18.32$<br>(c = 0.19 in CHCl <sub>3</sub> ) | 94% |
| 5     |  | <b>GC-MS:</b> column Chiraldex $\beta$ -3p, 60°C isothermal 60 min, $t_R = 53.6$ min (major)                           | $[\alpha]_D^{25.0} = 28.52$<br>(c = 0.24 in CHCl <sub>3</sub> ) | 99% |
| 6     |  | <b>GC-MS:</b> column Chiraldex $\beta$ -DM, 60°C hold 30min to 175°C at 3°C/min. $t_R = 21.8$ min (major)/23.2 (minor) | $[\alpha]_D^{25.0} = 22.45$<br>(c = 0.44 in CHCl <sub>3</sub> ) | 96% |

|    |                                                                                     |                                                                                                              |                                                                 |     |
|----|-------------------------------------------------------------------------------------|--------------------------------------------------------------------------------------------------------------|-----------------------------------------------------------------|-----|
| 7  | 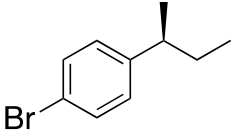   | <b>GC-MS:</b> column Chiraldex $\beta$ -6TBDM, 70°C isothermal 90 min, $t_R$ = 94.5 min (major)/94.7 (minor) | $[\alpha]_D^{25.0} = 22.05$<br>(c = 0.45 in CHCl <sub>3</sub> ) | 94% |
| 8  |    | Chiraldex $\beta$ -6TBDM, 60°C hold 30 min to 175°C at 3°C/min. $t_R$ = 47.0 min (major)/47.4 (minor)        | $[\alpha]_D^{25.0} = 23.96$<br>(c = 0.41 in CHCl <sub>3</sub> ) | 96% |
| 9  |    | <b>GC-MS:</b> column Chiraldex $\beta$ -6TBDM, 80°C isothermal 90 min, $t_R$ = 16.8 min (major)/18.3 (minor) | $[\alpha]_D^{25.0} = 18.90$<br>(c = 0.36 in CHCl <sub>3</sub> ) | 94% |
| 10 |  | <b>GC-MS:</b> column Chiraldex $\beta$ -3p, 80°C isothermal 60 min, $t_R$ = 32.8 min (minor)/34.1 (major)    | $[\alpha]_D^{25.0} = 25.14$<br>(c = 0.36 in CHCl <sub>3</sub> ) | 94% |
| 11 |  | <b>GC-MS:</b> column Chiraldex $\beta$ -3p, 70°C isothermal 90 min, $t_R$ = 82.2 min (minor)/82.4 (major)    | $[\alpha]_D^{25.0} = 21.58$<br>(c = 0.45 in CHCl <sub>3</sub> ) | 93% |
| 12 |  | <b>HPLC-SFC,</b> OJH column, 5% MeOH, 2 ml/min, 10min, $t_R$ = 5.6 min (minor)/7.1 (major)                   | $[\alpha]_D^{25.0} = 75.06$<br>(c = 0.40 in CHCl <sub>3</sub> ) | 97% |

|    |                                                                                   |                                                                                                            |                                                               |     |
|----|-----------------------------------------------------------------------------------|------------------------------------------------------------------------------------------------------------|---------------------------------------------------------------|-----|
| 13 | 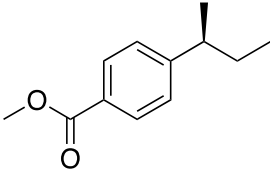 | Chiraldex $\beta$ -6TBDM, 60°C hold 30 min to 175°C at 3°C/min. $t_R$ = 53.7 min (major)/50.9 (minor)      | $[\alpha]_D^{25.0} = 17.37$ (c = 0.305 in CHCl <sub>3</sub> ) | 90% |
| 14 |  | <b>HPLC-SFC</b> , OJH column, 5% MeOH, 2 ml/min, 10min, $t_R$ = 5.6 min (minor)/7.1 (major)                | $[\alpha]_D^{25.0} = 16.76$ (c = 0.32 in CHCl <sub>3</sub> )  | 95% |
| 15 |  | <b>GC-MS</b> : column Chiraldex $\beta$ -DM, 90°C isothermal 150 min $t_R$ = 71.2 min (major)/74.6 (minor) | $[\alpha]_D^{24.0} = +41.0$ (c = 0.83 in CHCl <sub>3</sub> )  | 95% |

# 5. <sup>1</sup>H and <sup>13</sup>C NMR spectroscopic data of the substrates

SK-170923-8-294.10.fid

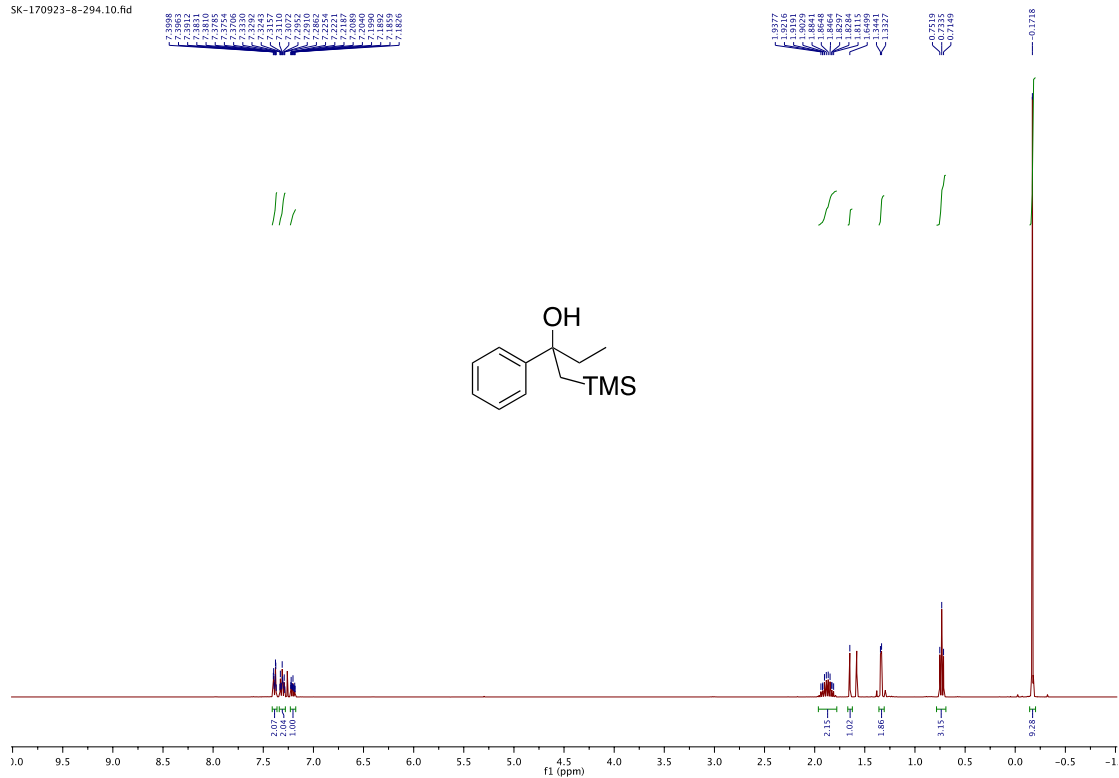

SK-170923-8-294\_2.10.fid

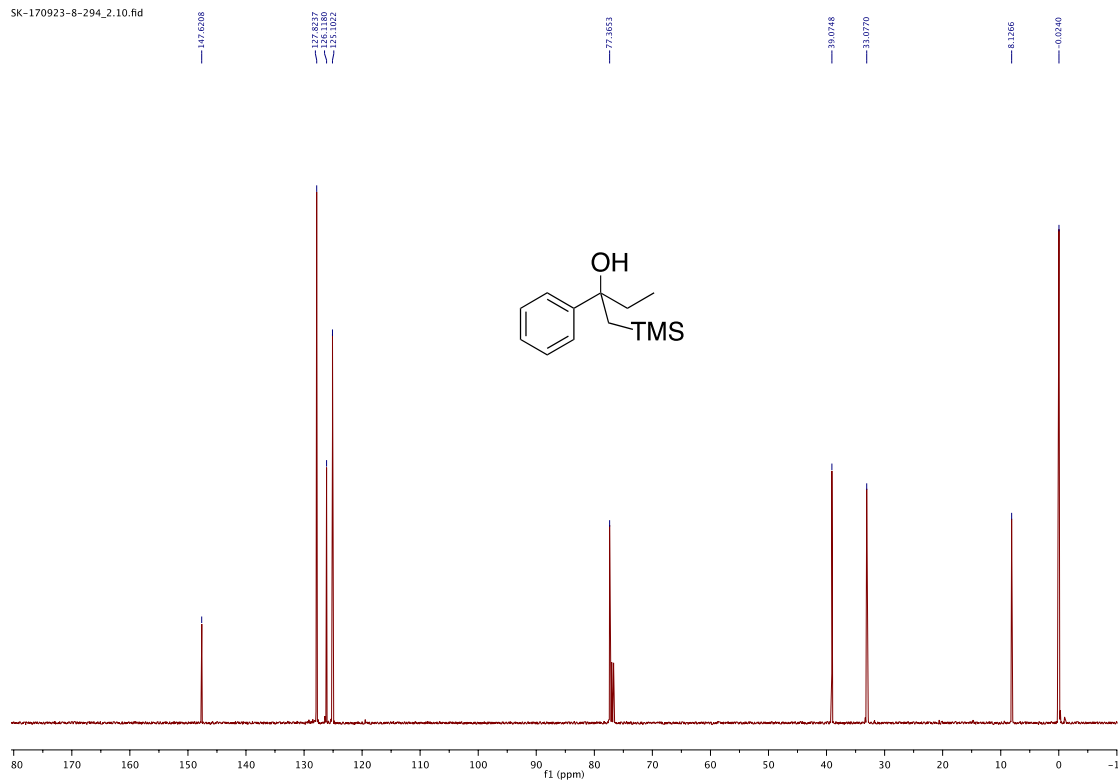



SK-170923-9-Halbo.10.fid

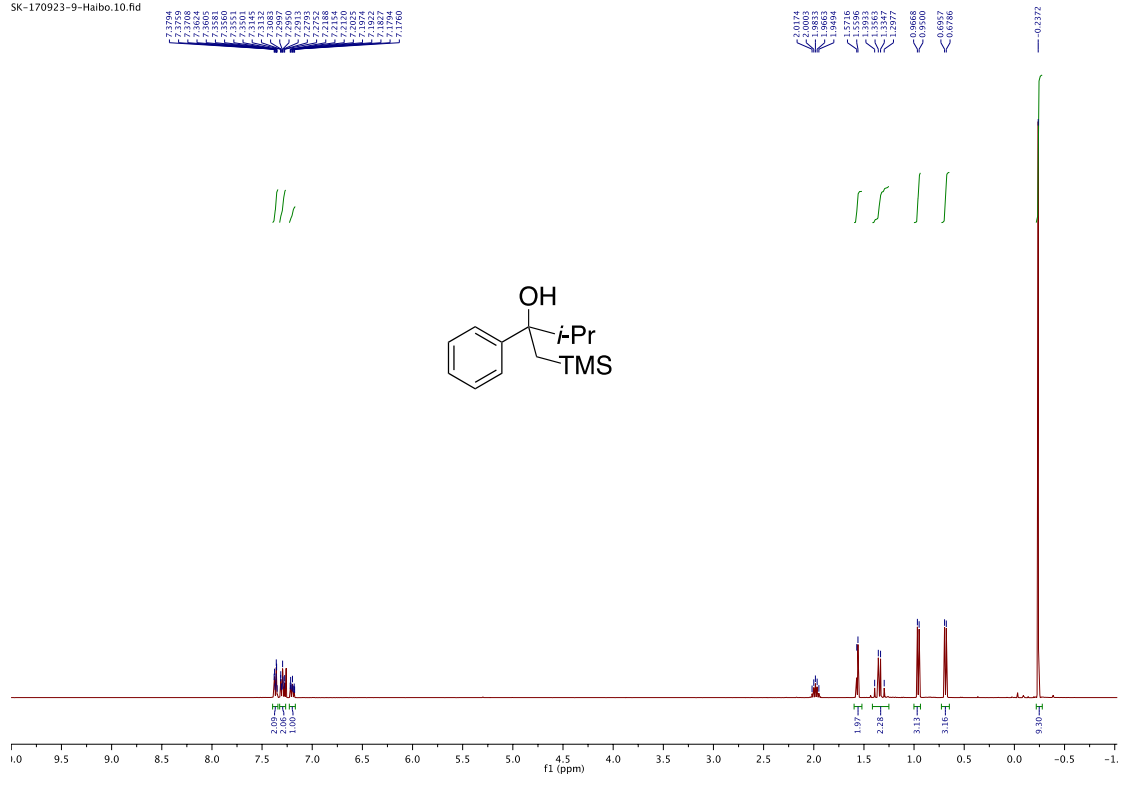

SK-170311-8-HW-silylOH.10.fid

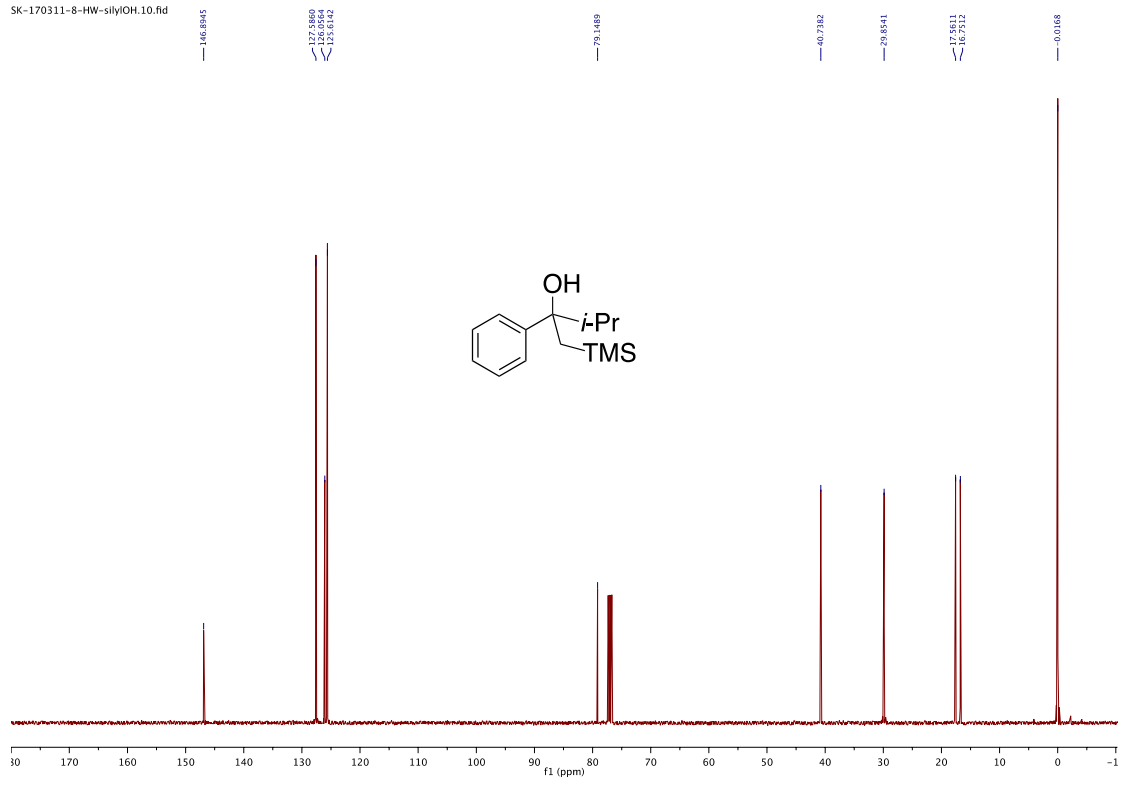

SK-170923-8-295.10.fid

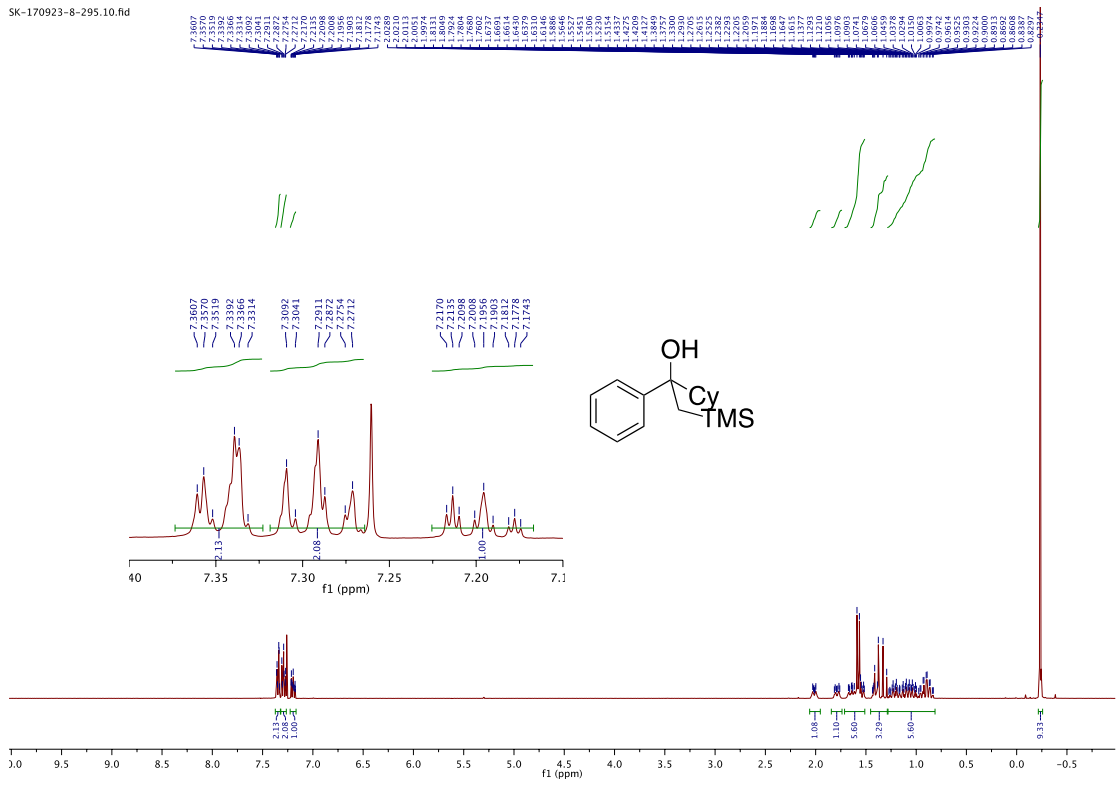



SK-170923-9-121A.10.fid

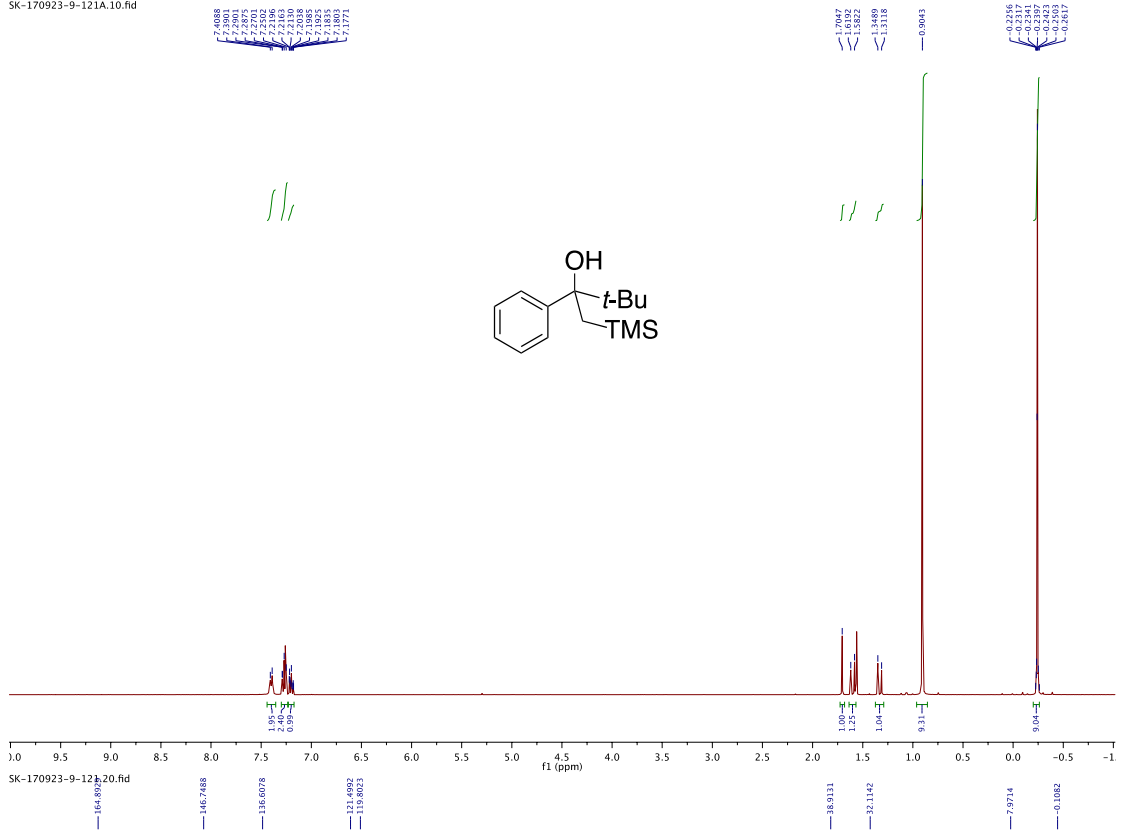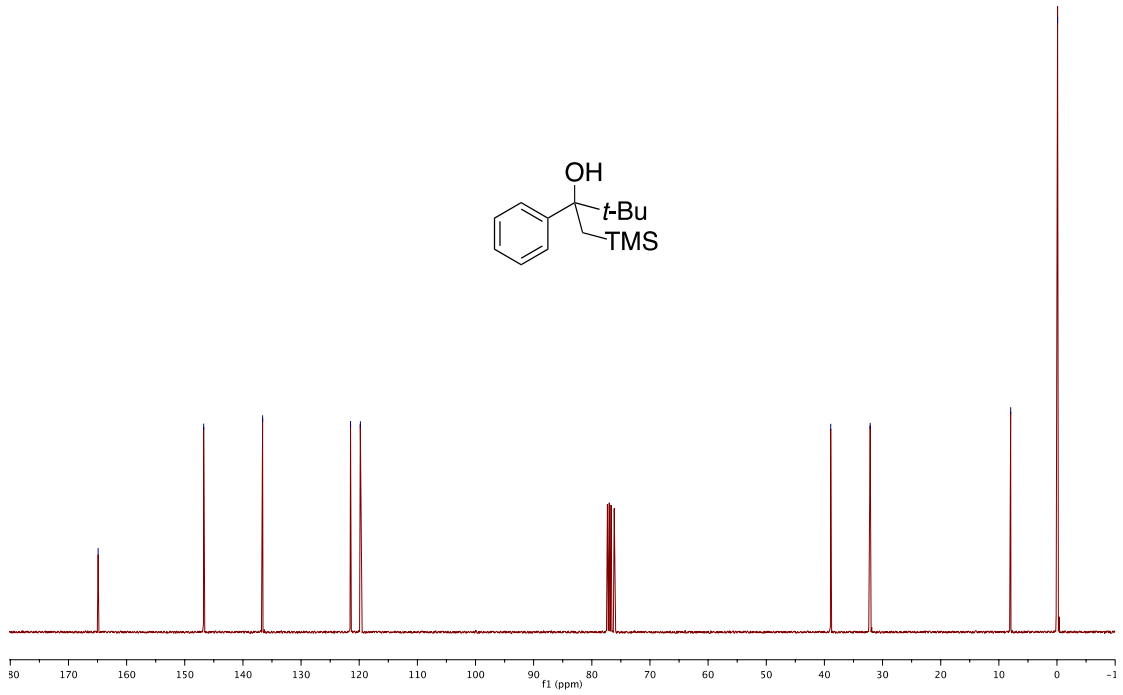

SK-170817-9-056re.10.fid

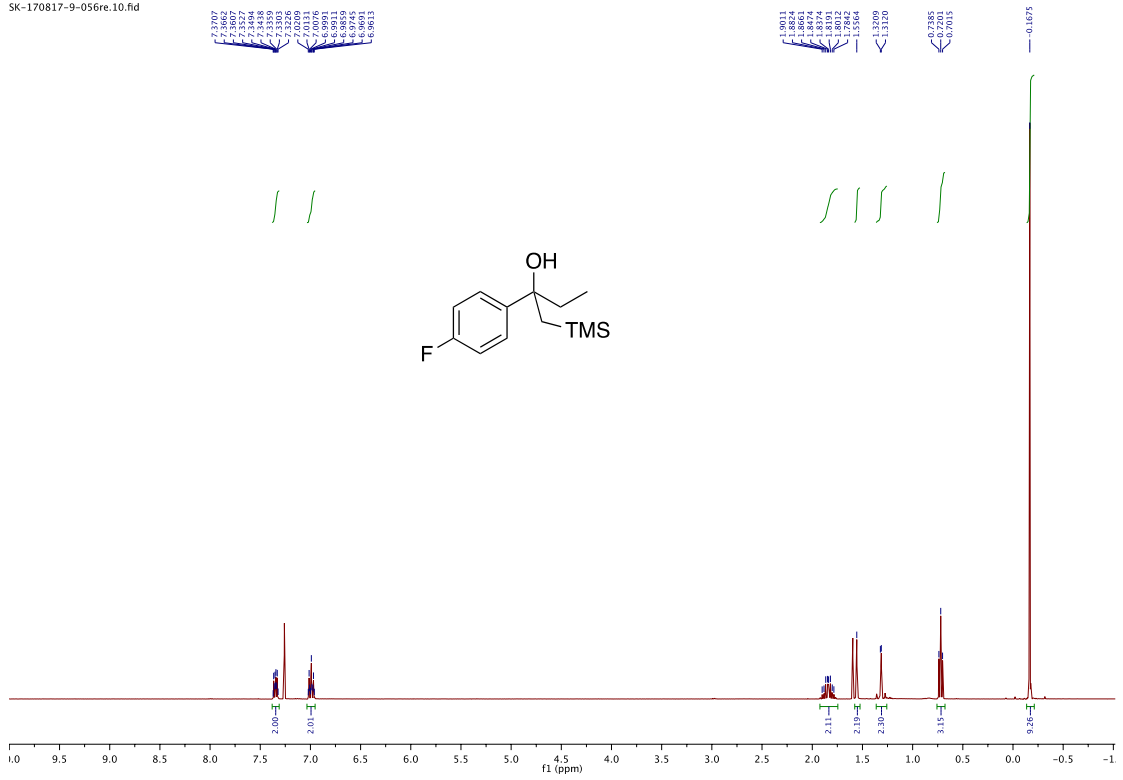

SK-170923-9-056.10.fid

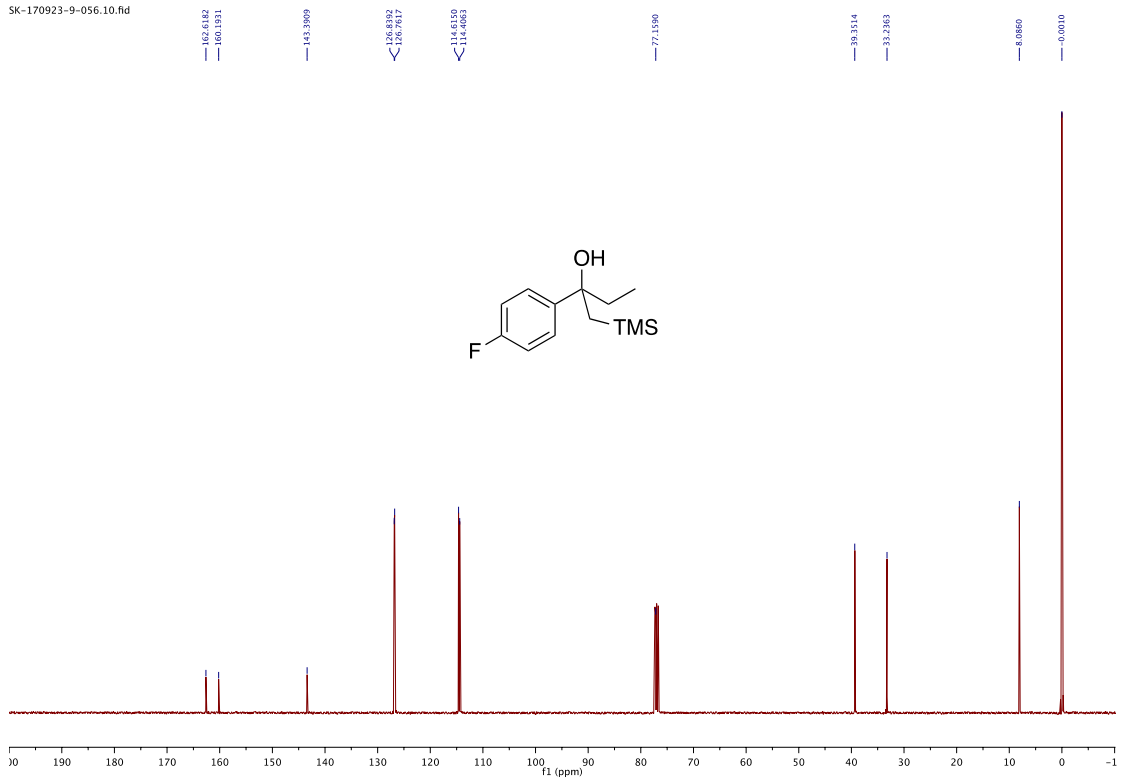

SK-170923-8-127.10.fid

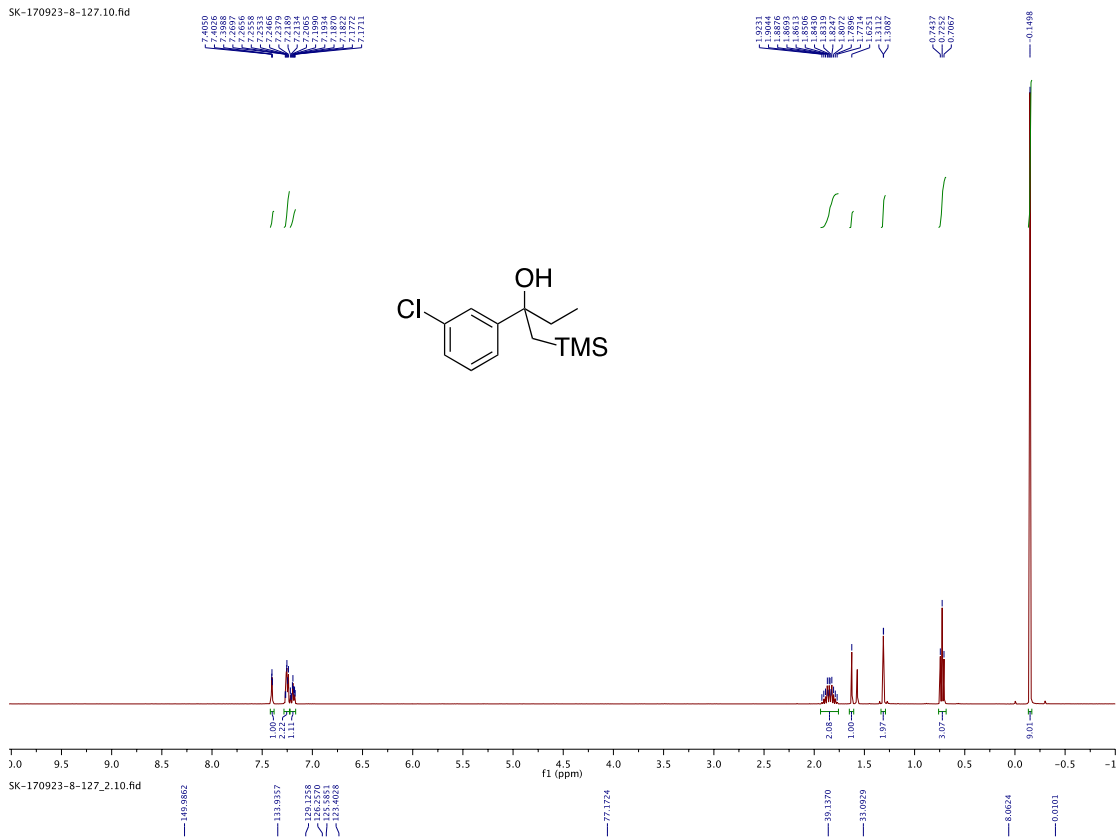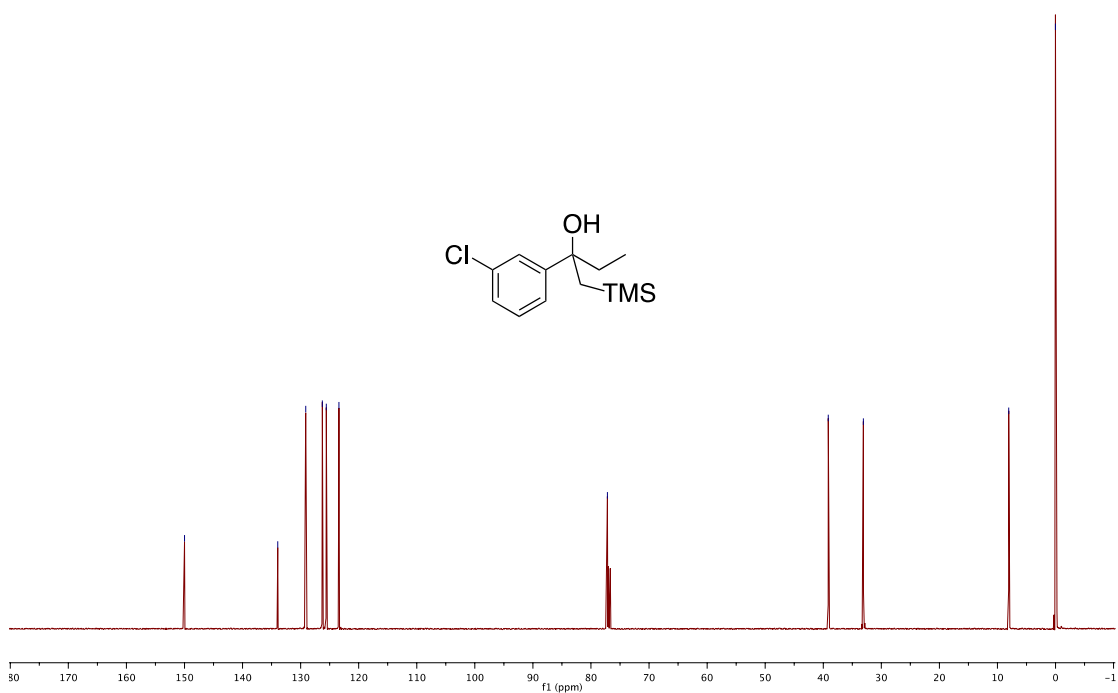



SK-170923-9-113.10.fid

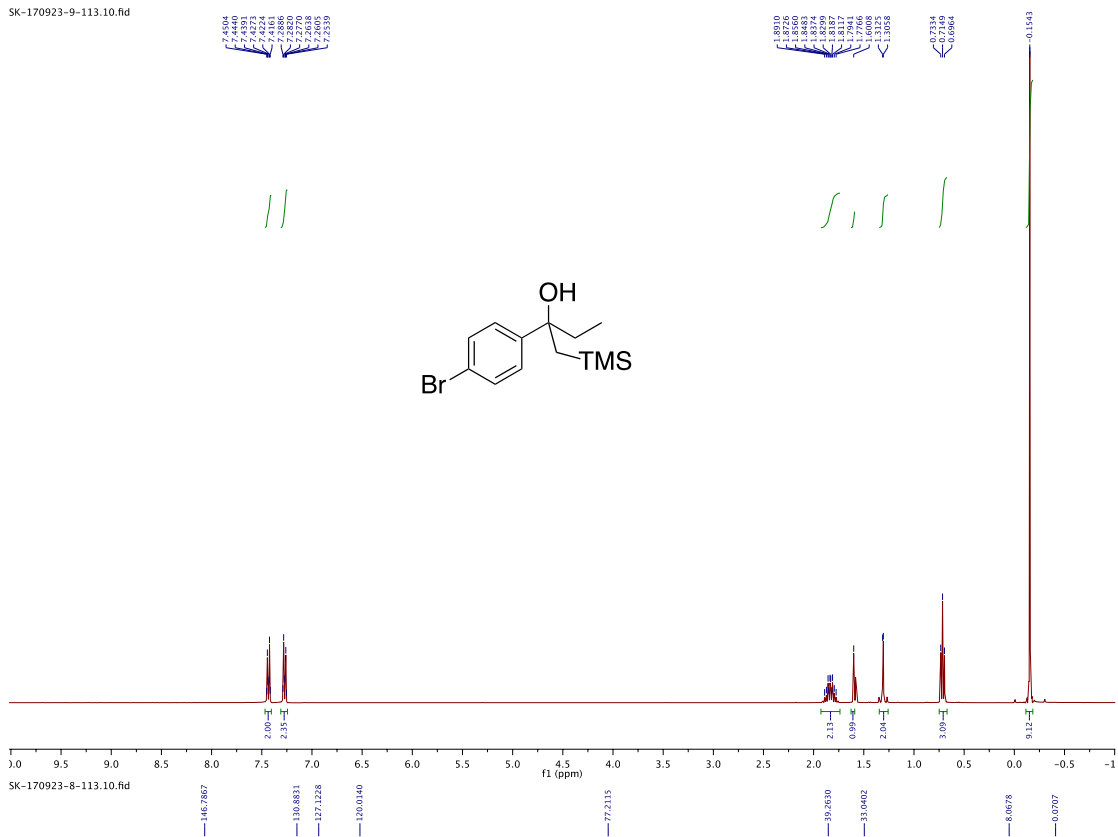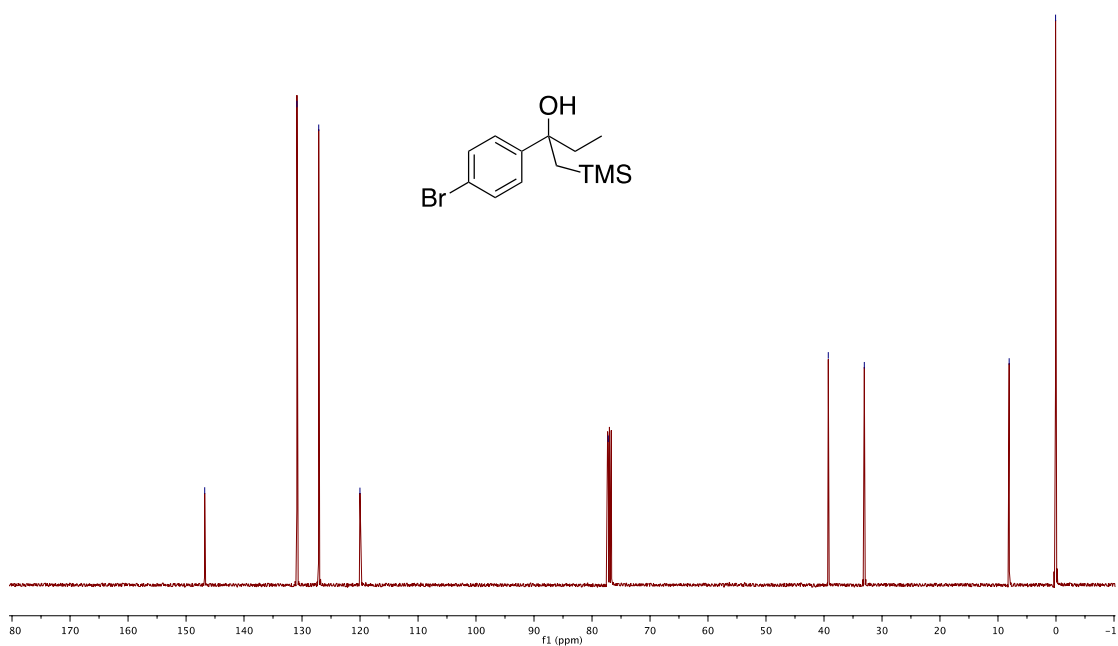



SK-170923-9-118.10.fid

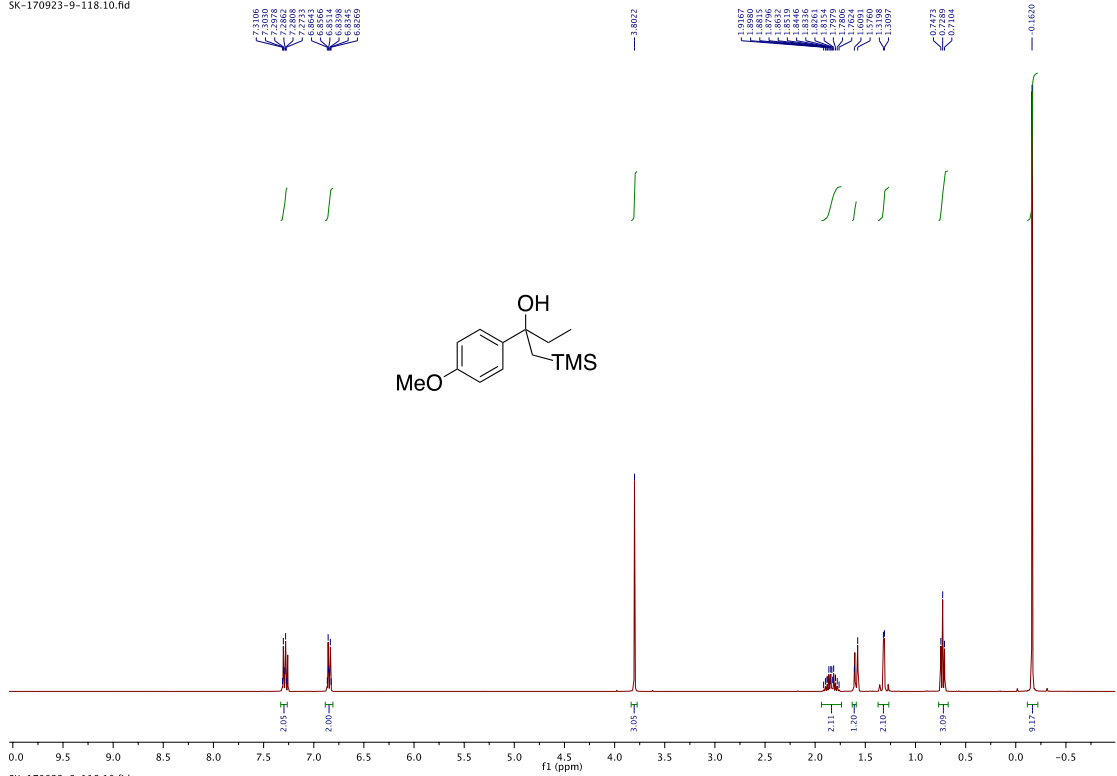

SK-170923-8-118.10.fid

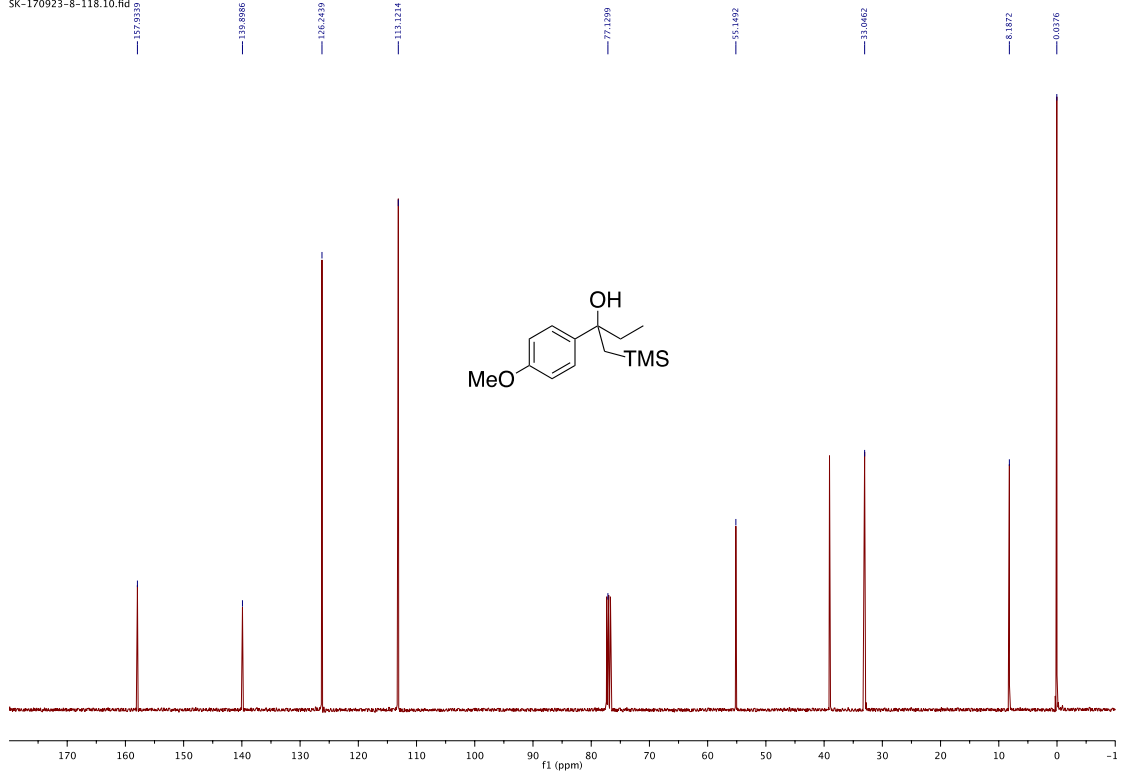

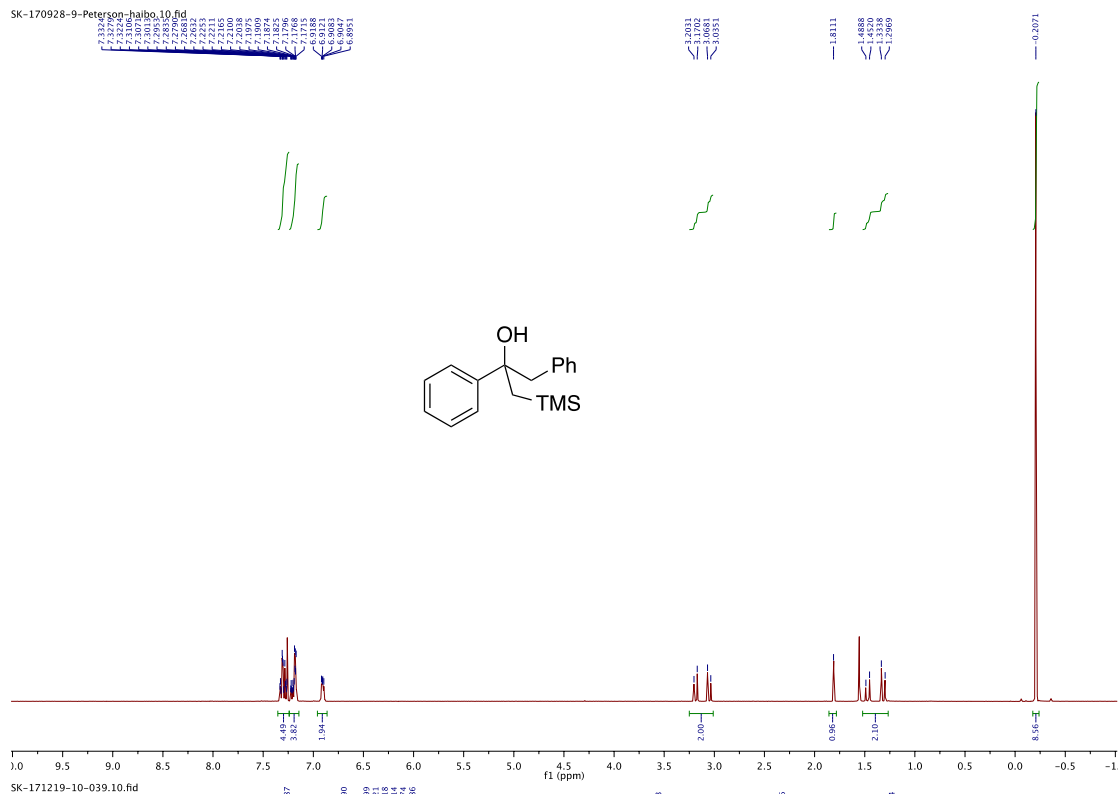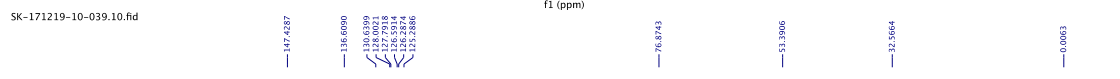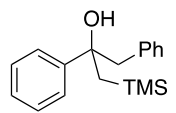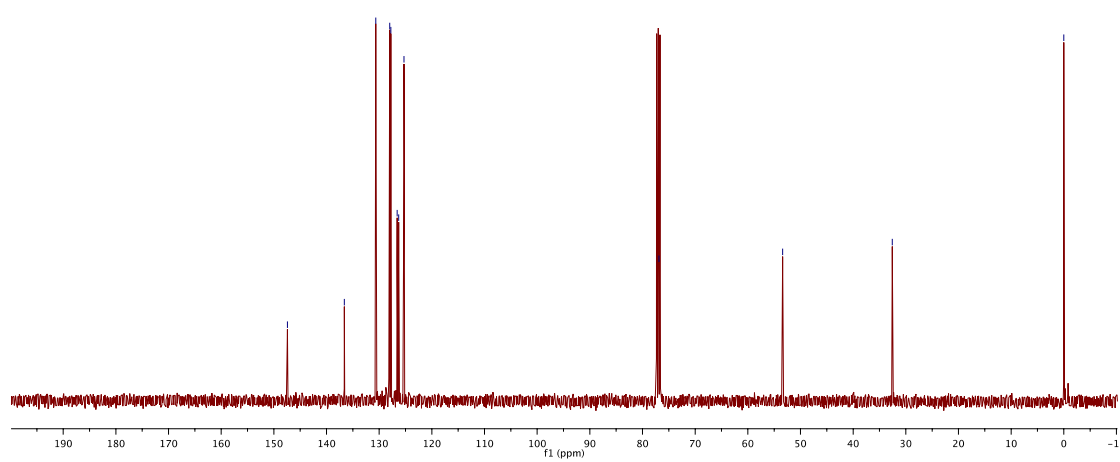



SK-180317-10-135column.10.fid

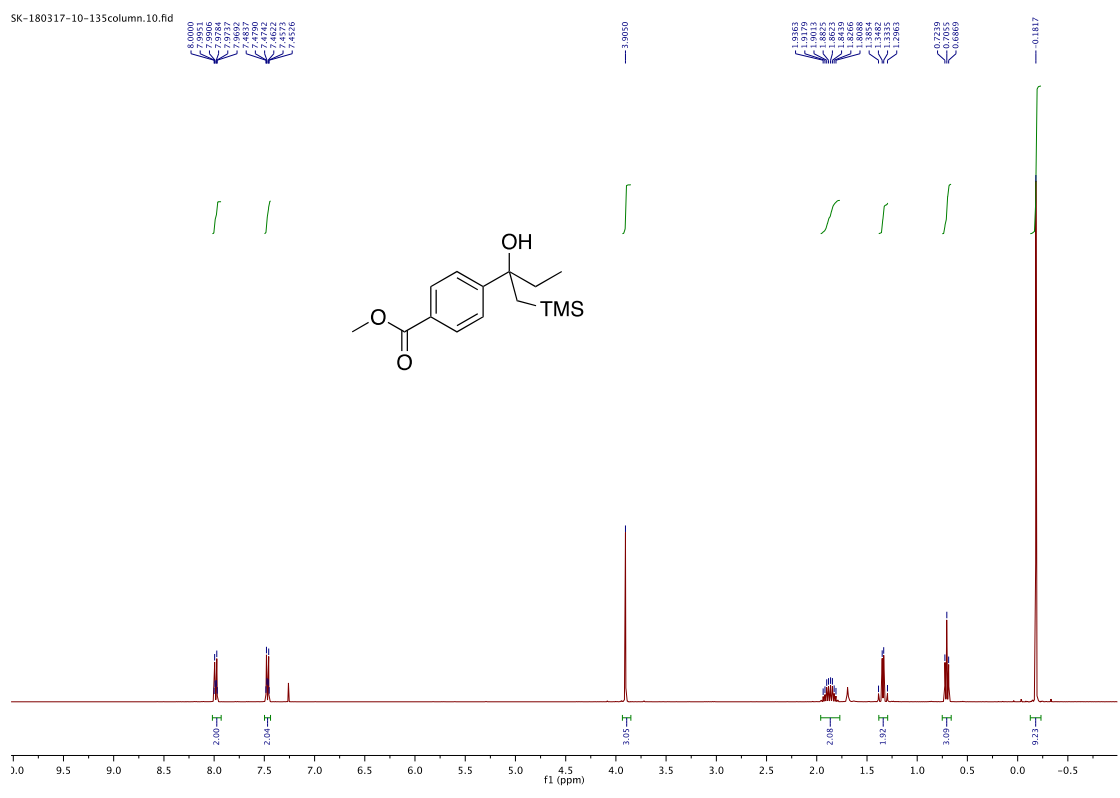

SK-180418-10-135.10.fid

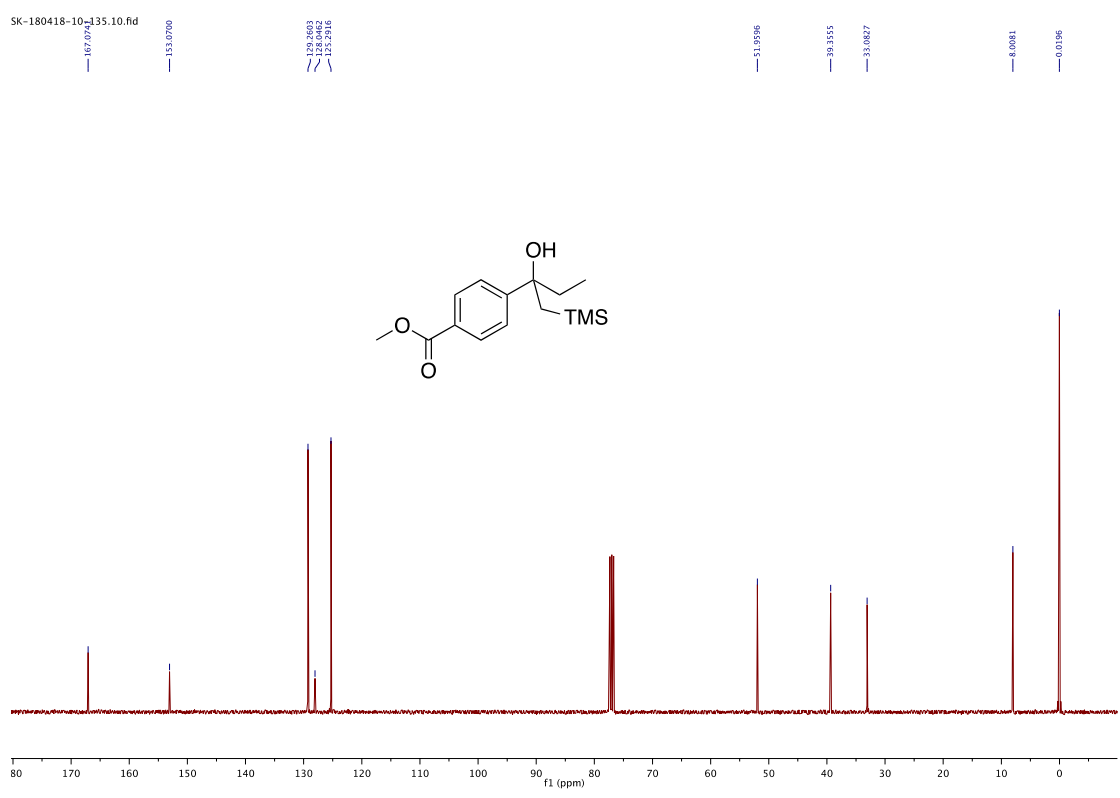

SK-180411-10-120.10.fid

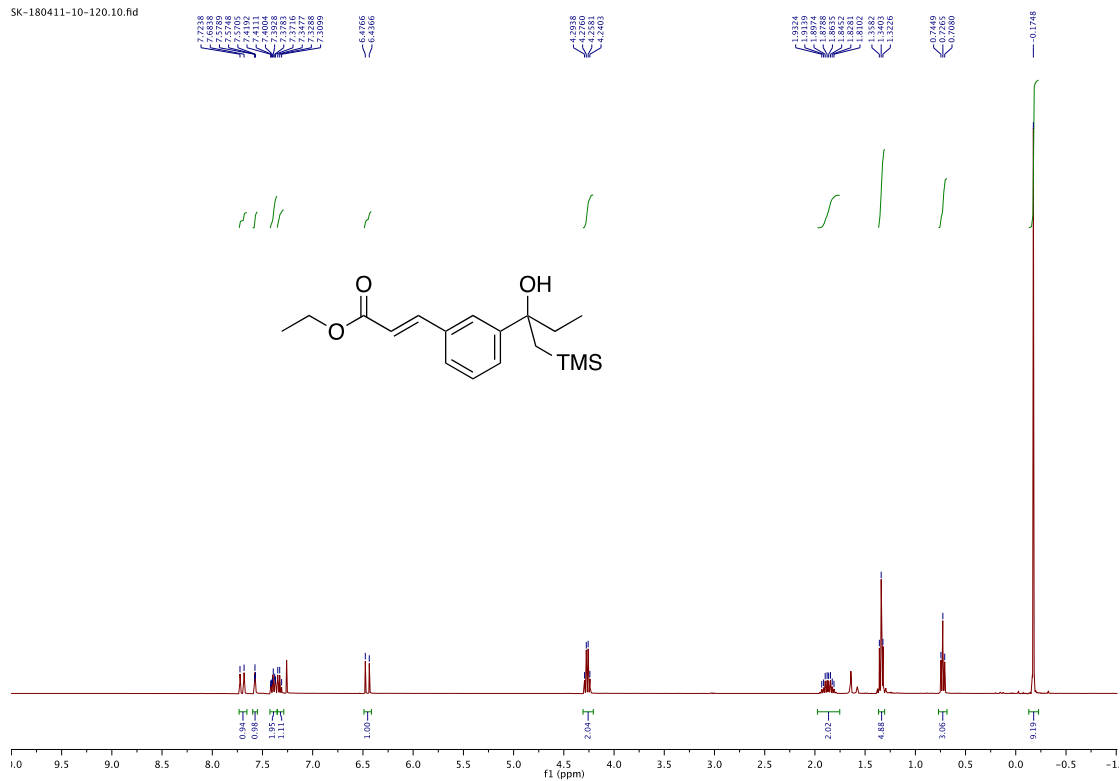

SK-180411-10-120.11.fid

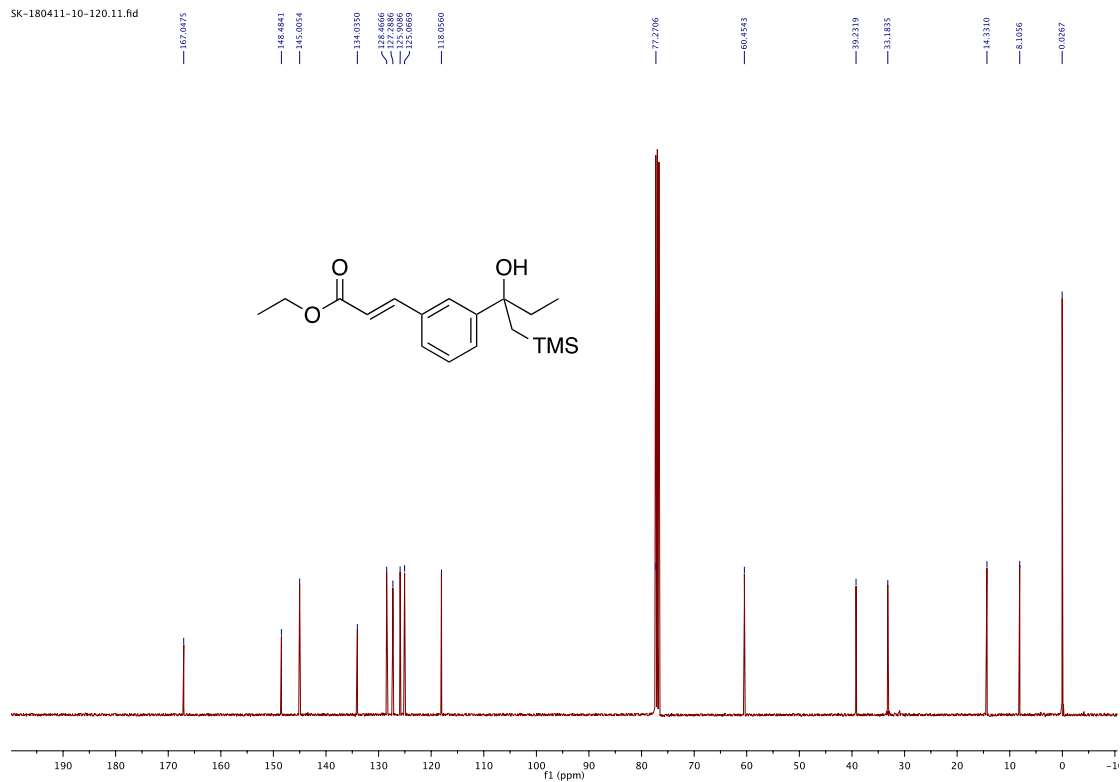

SK-180412-10211.10.fid

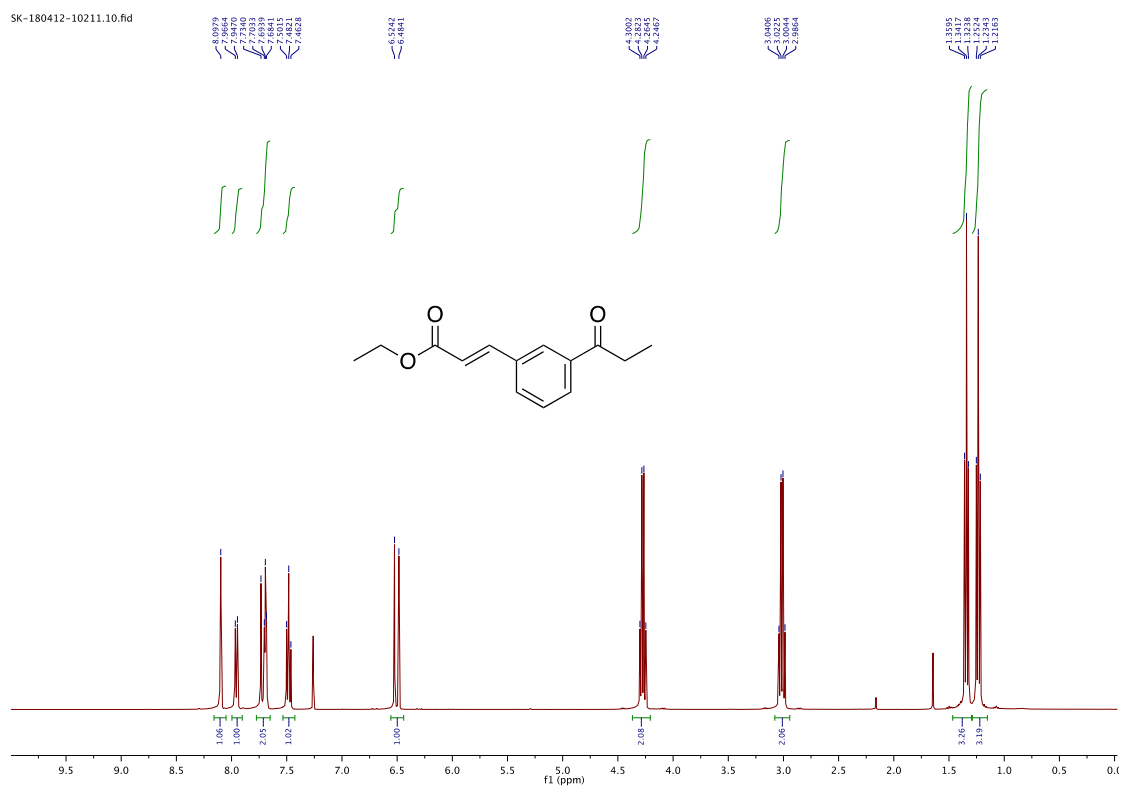

SK-180412-10-211.10.fid

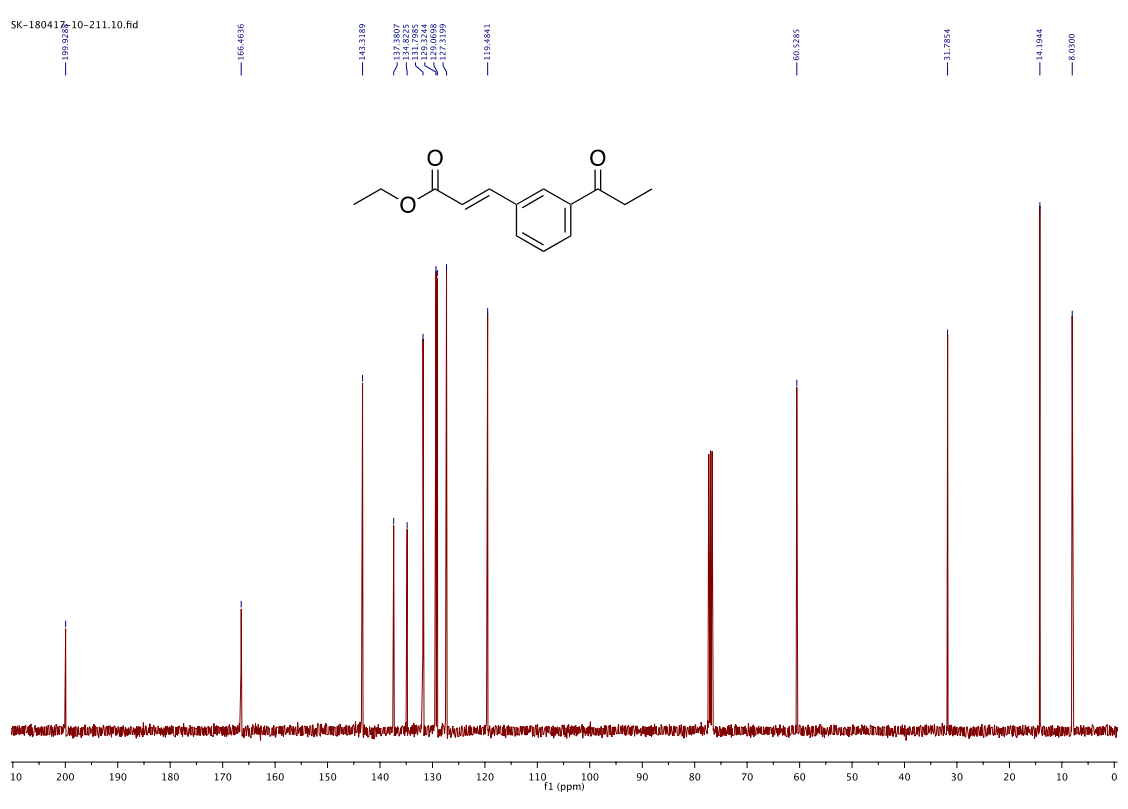

# NMR spectroscopic data for intermediates of Iridium complexes.

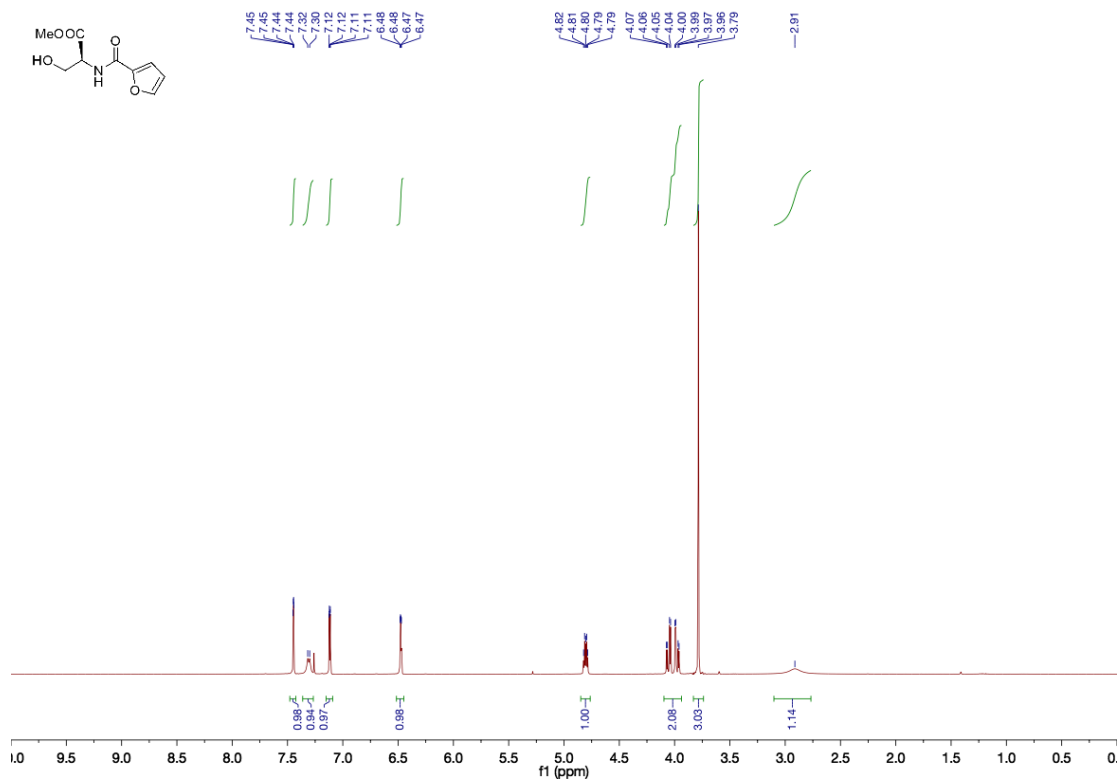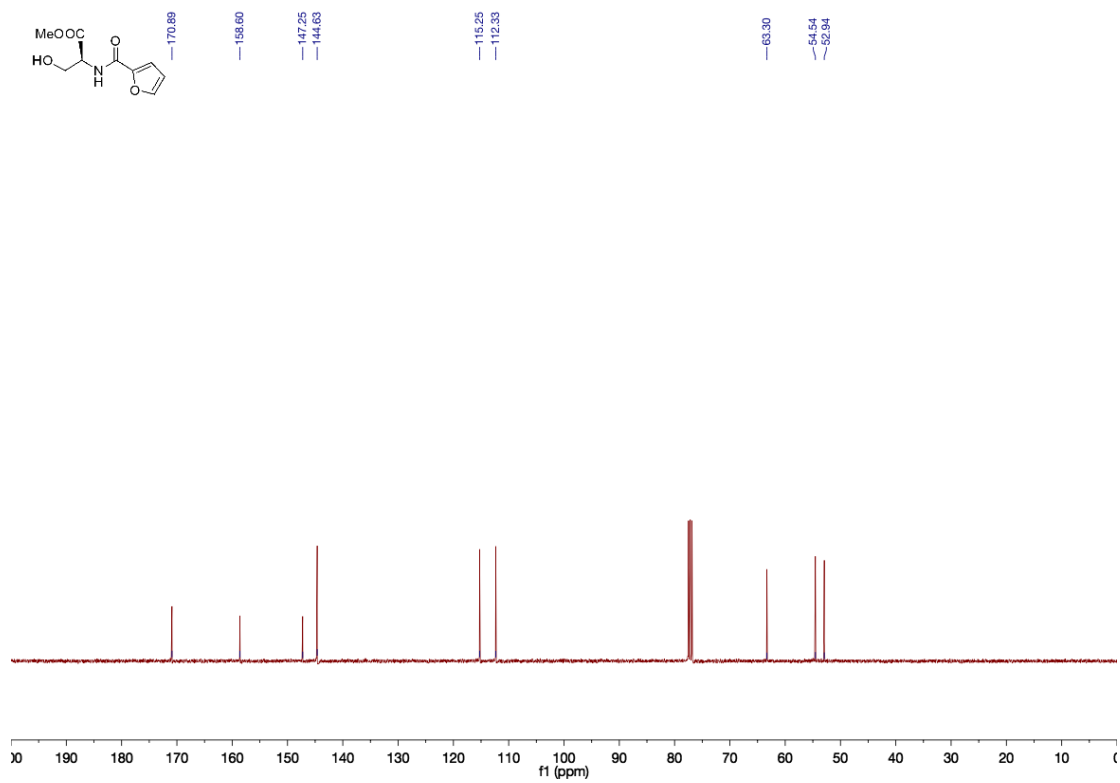

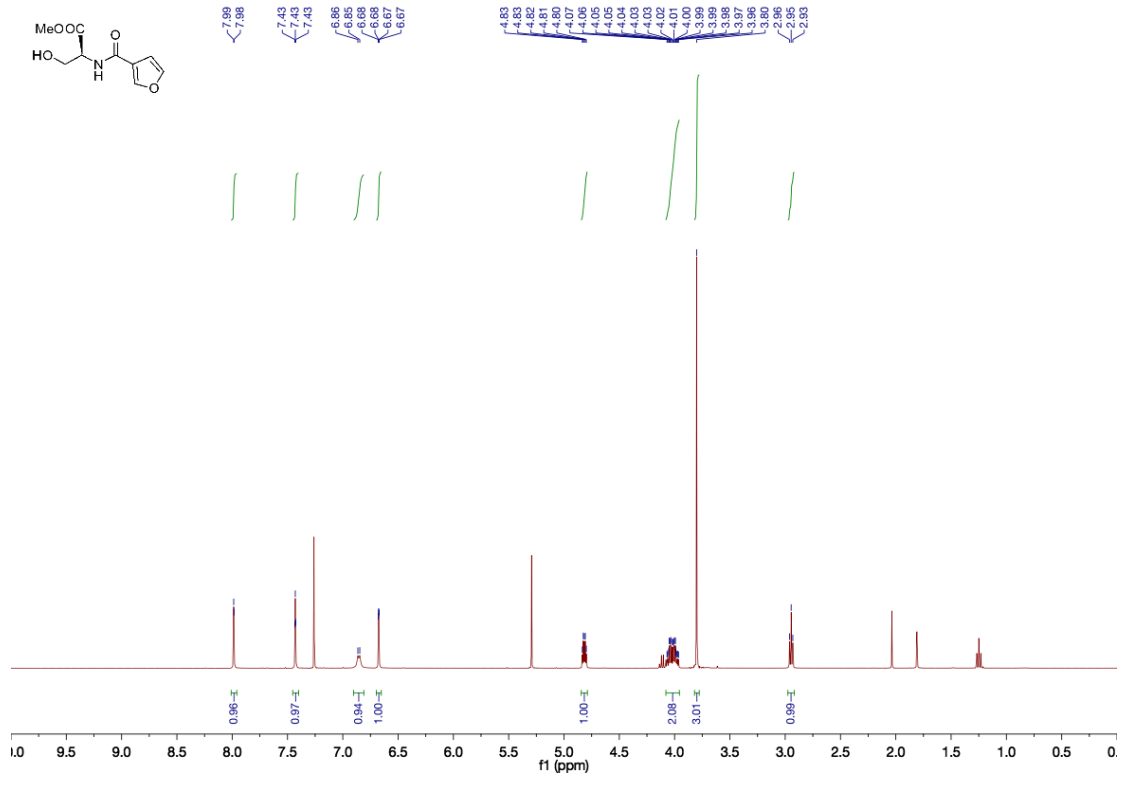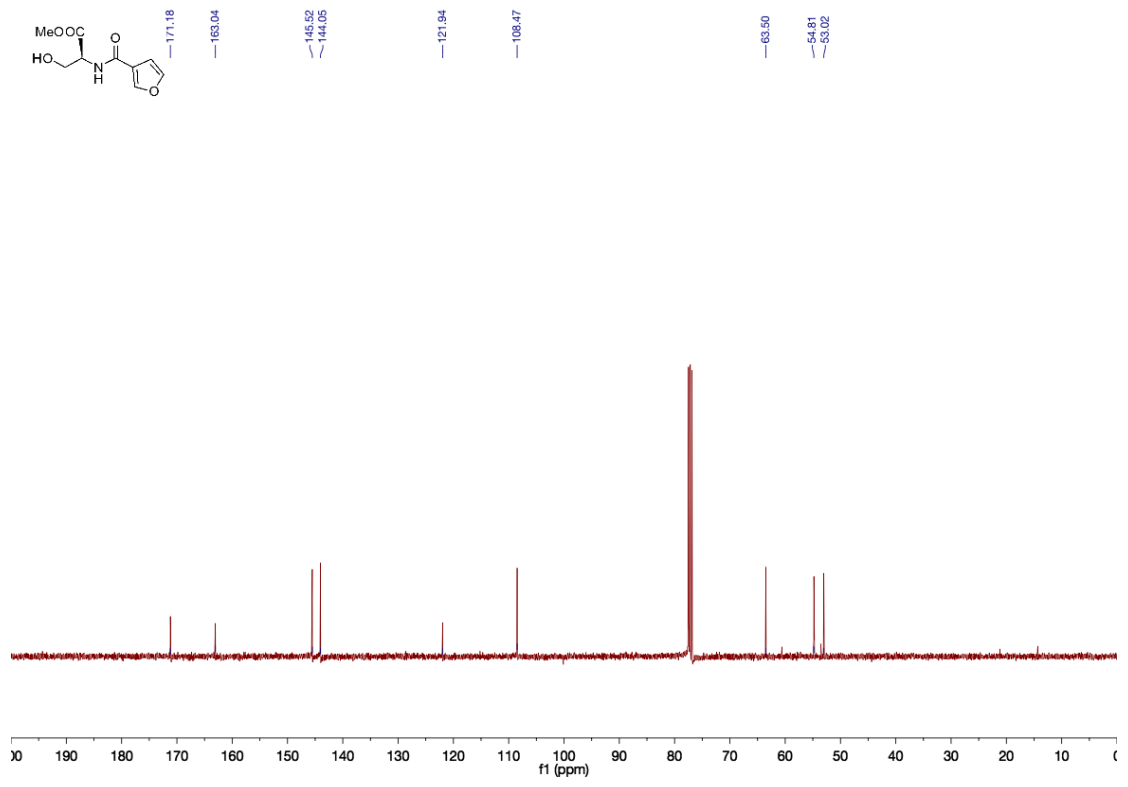

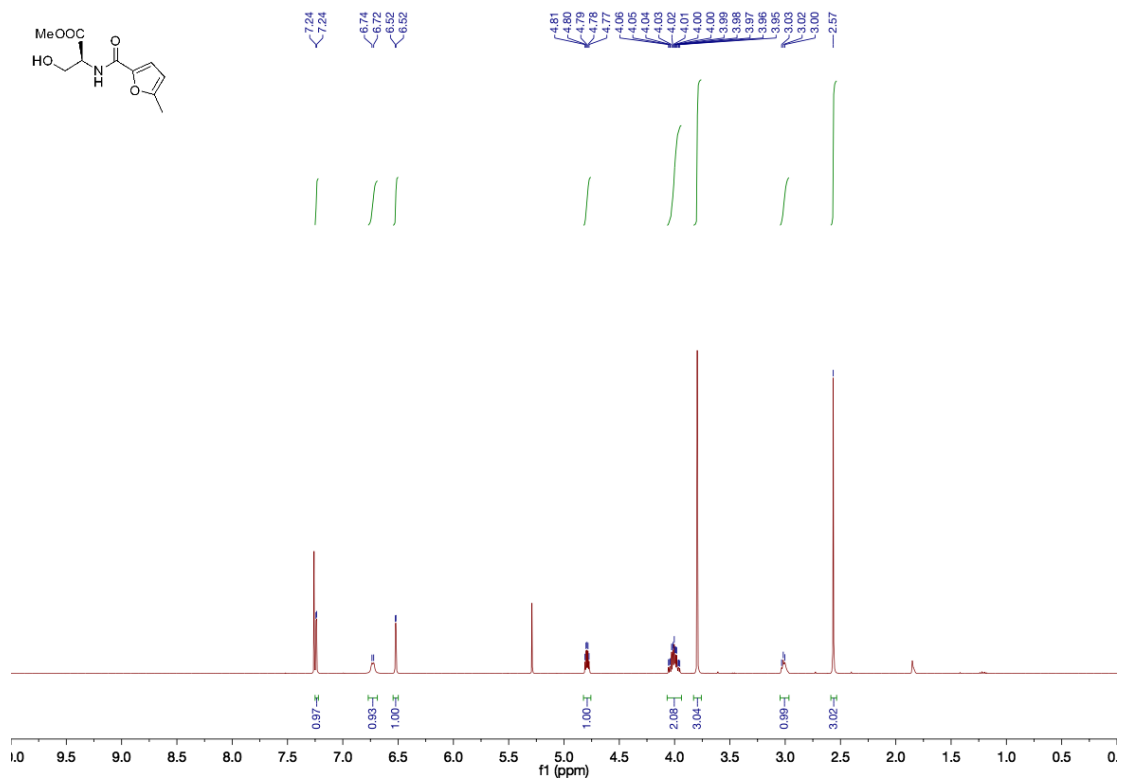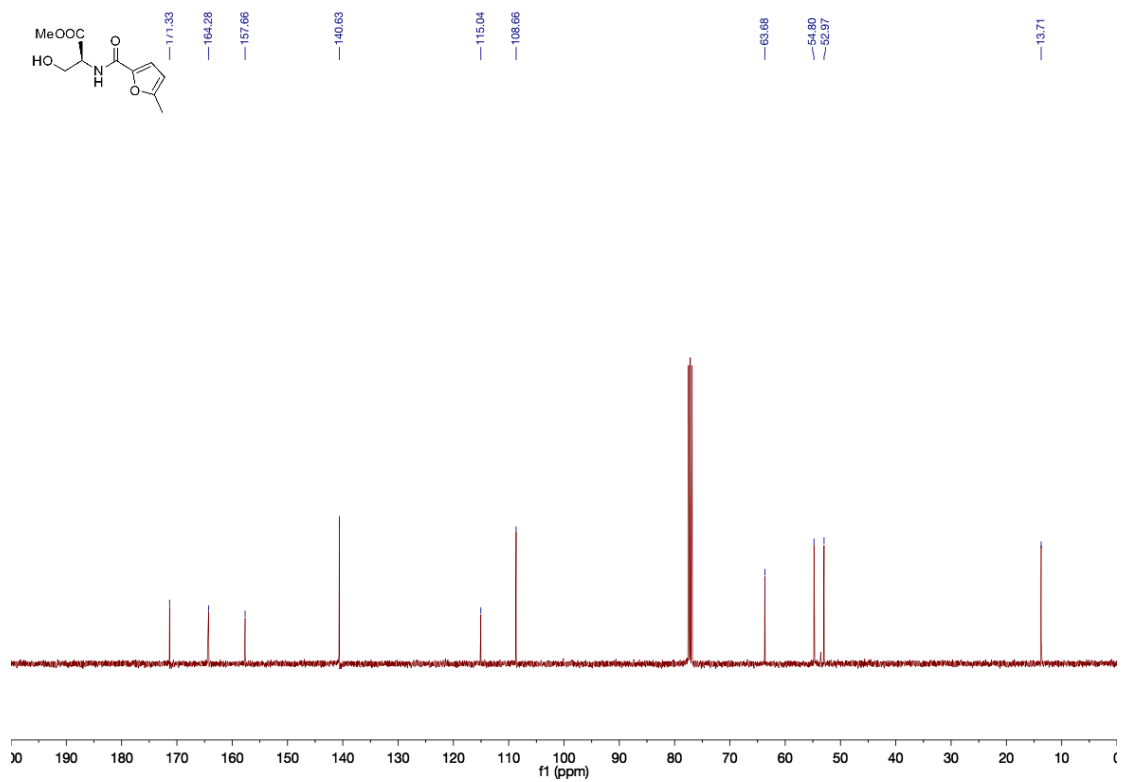

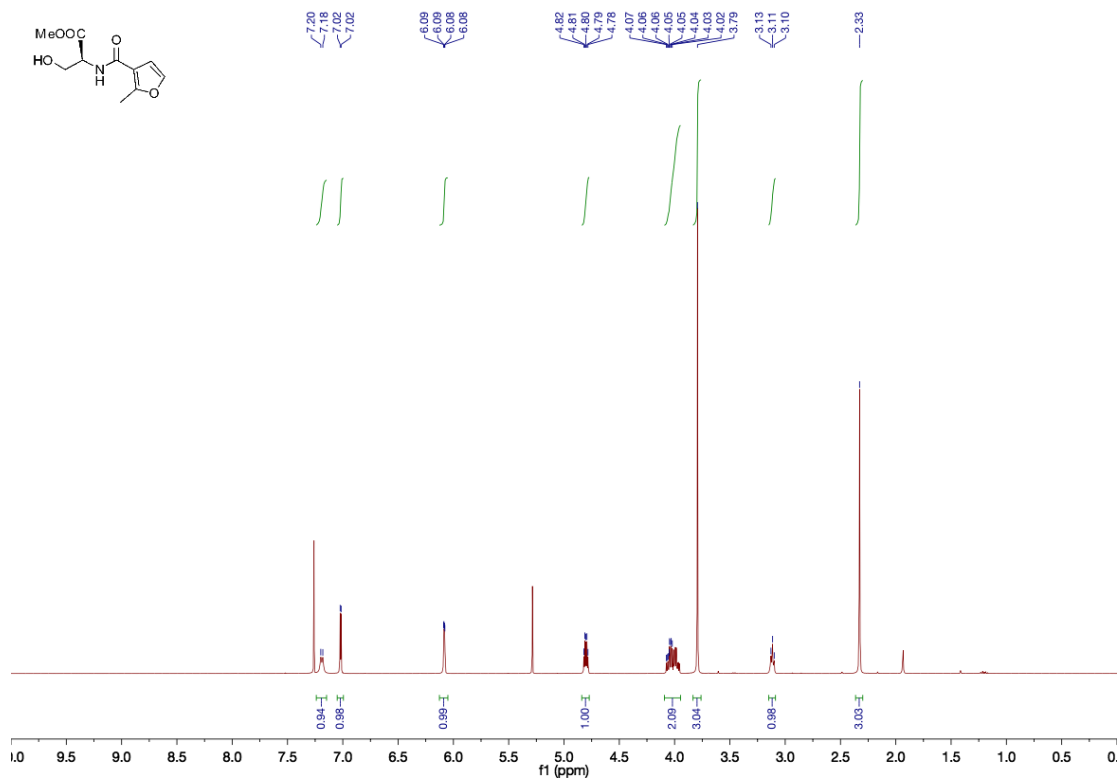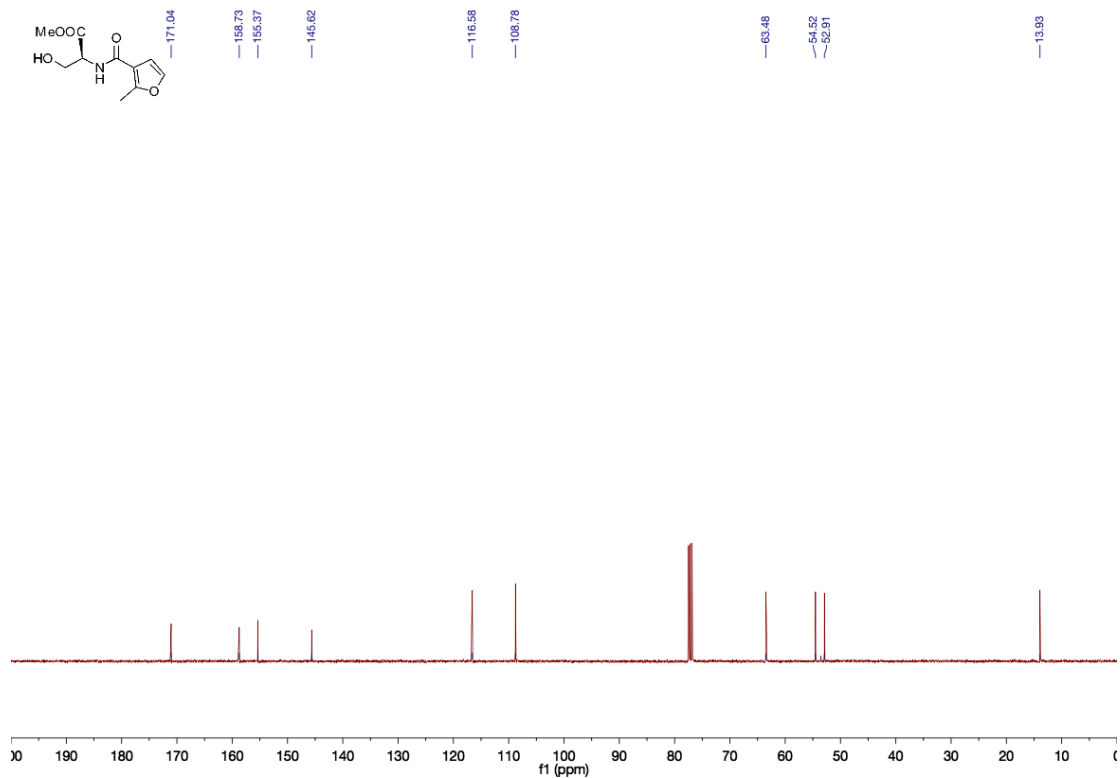

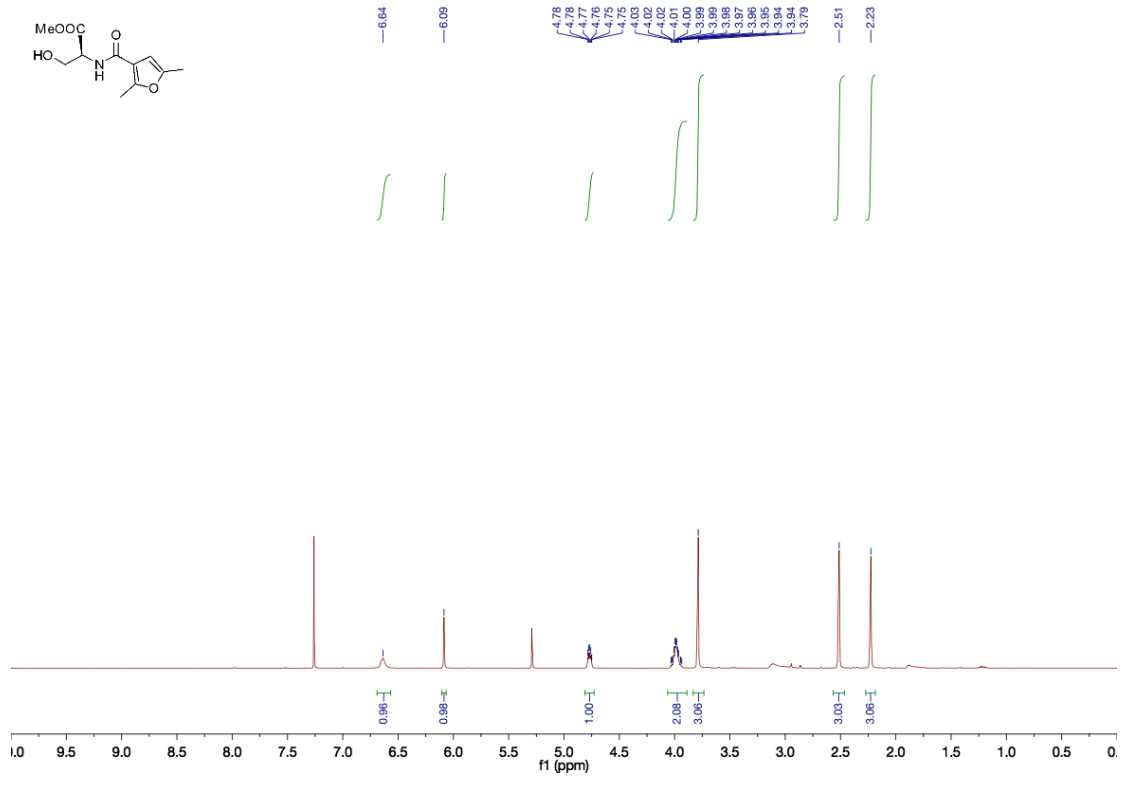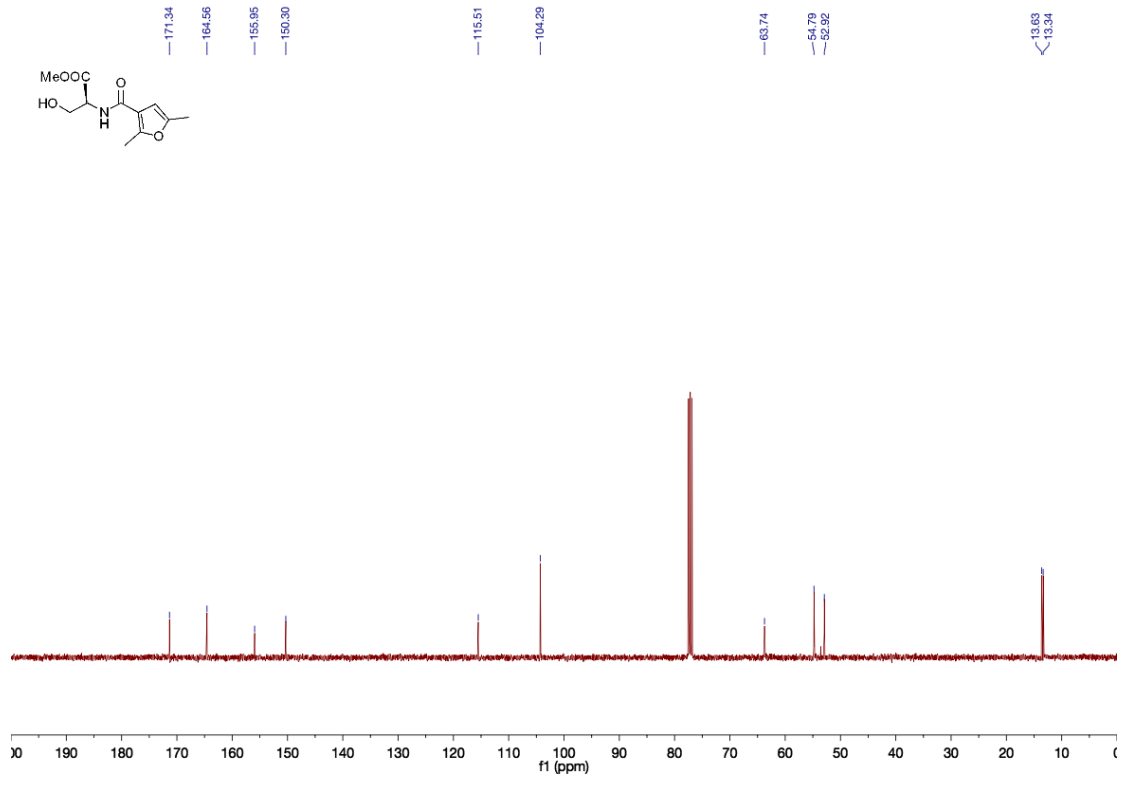



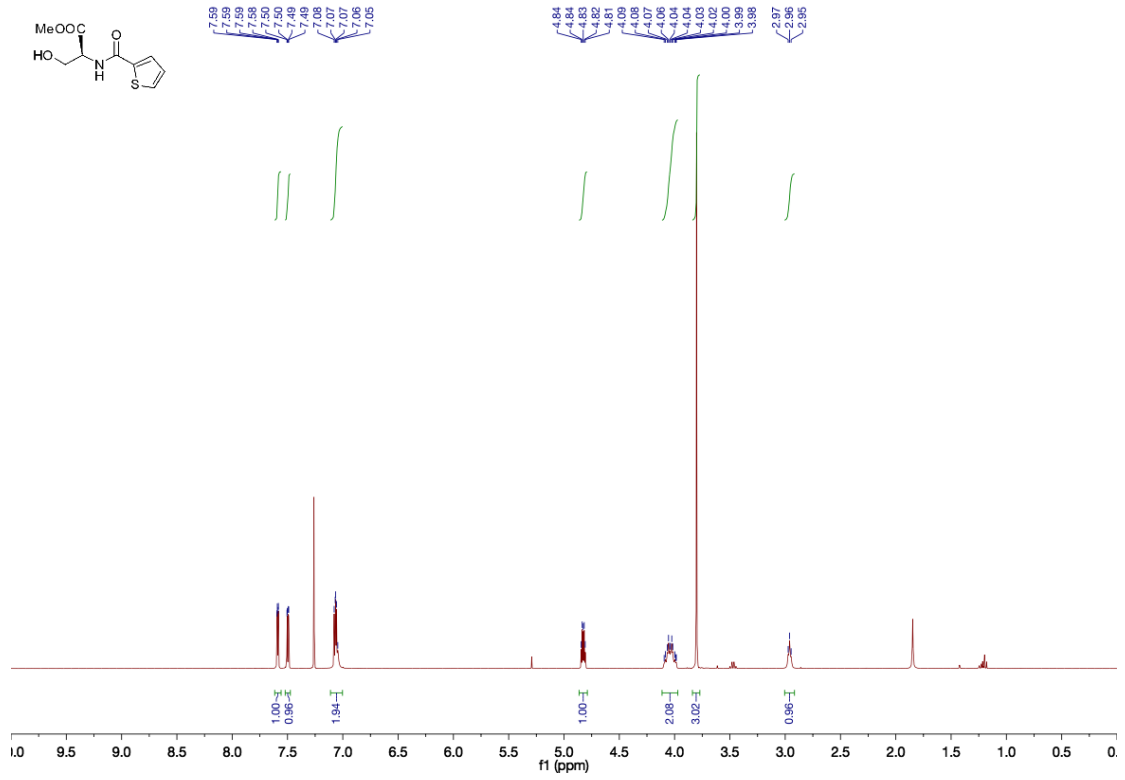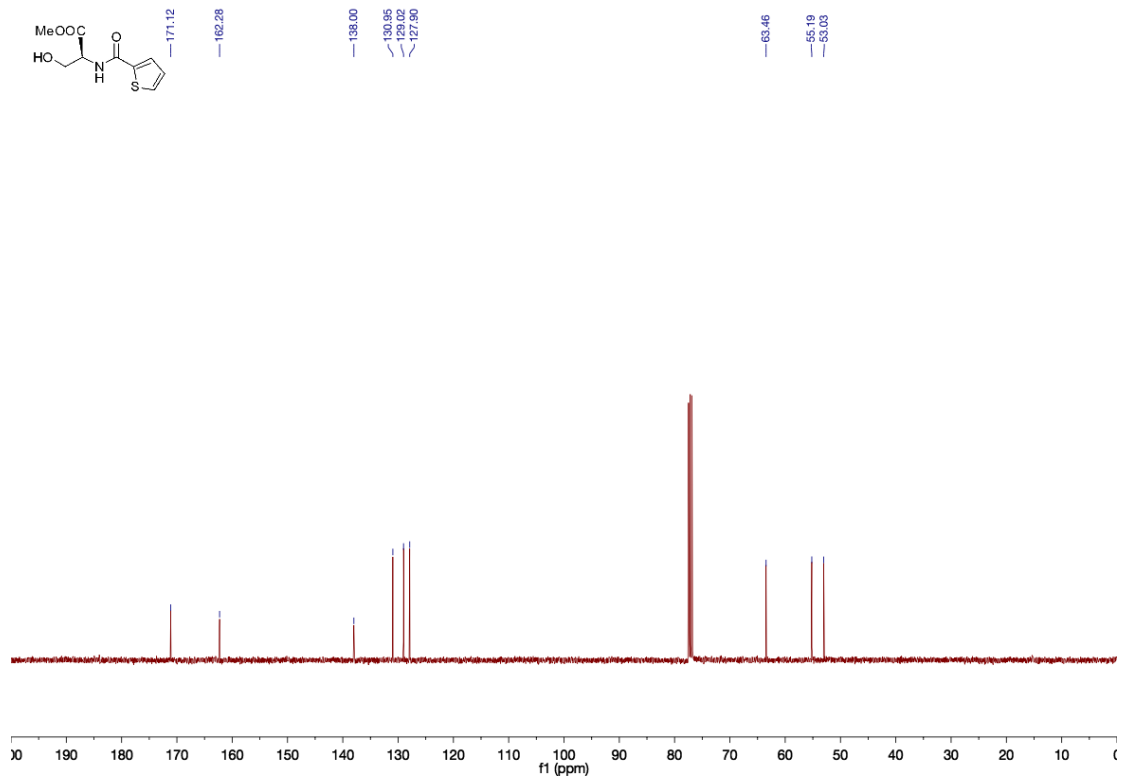

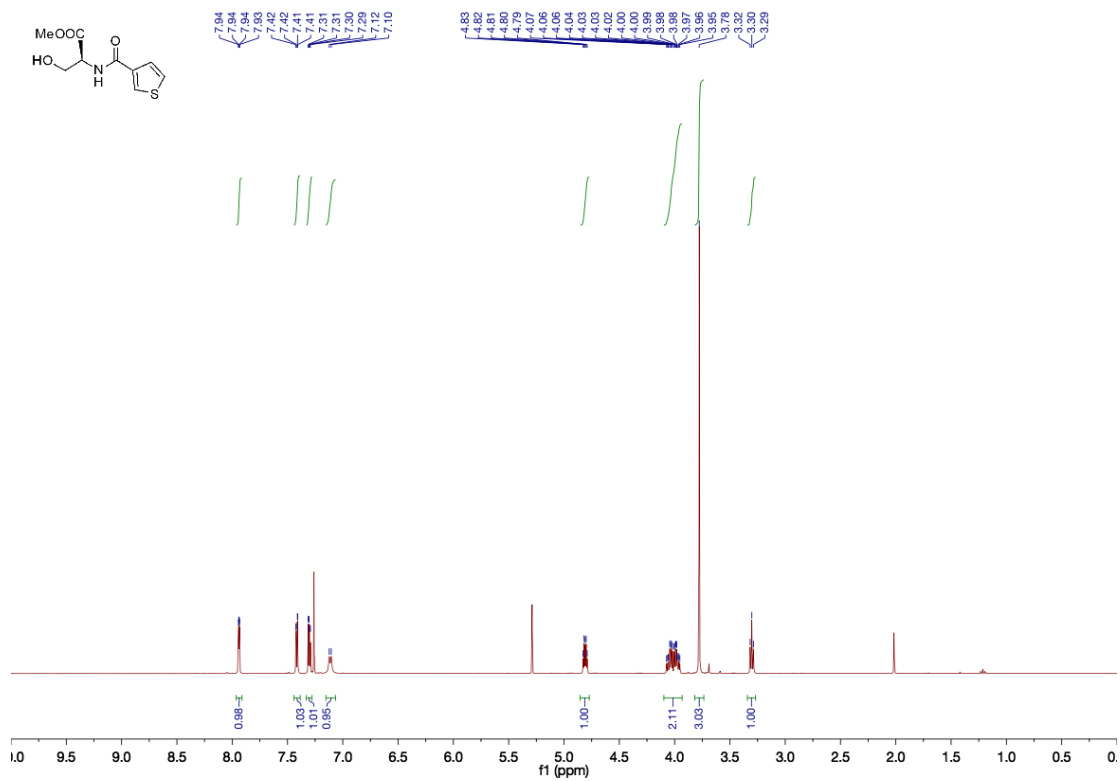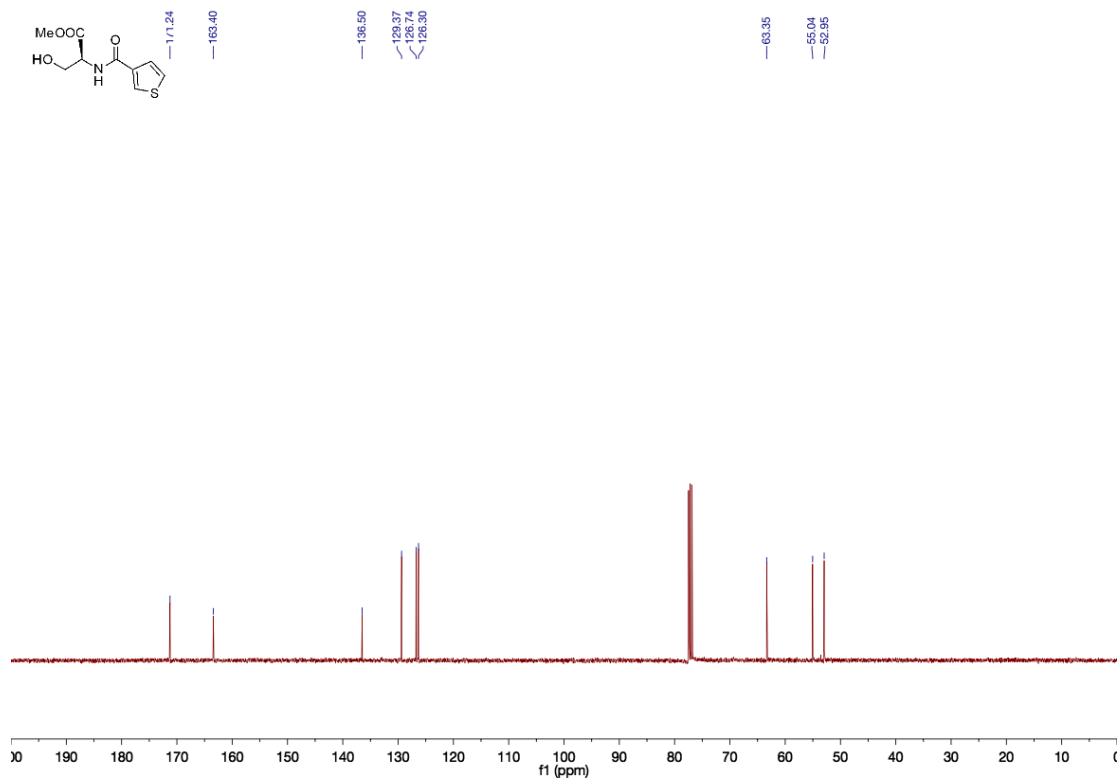

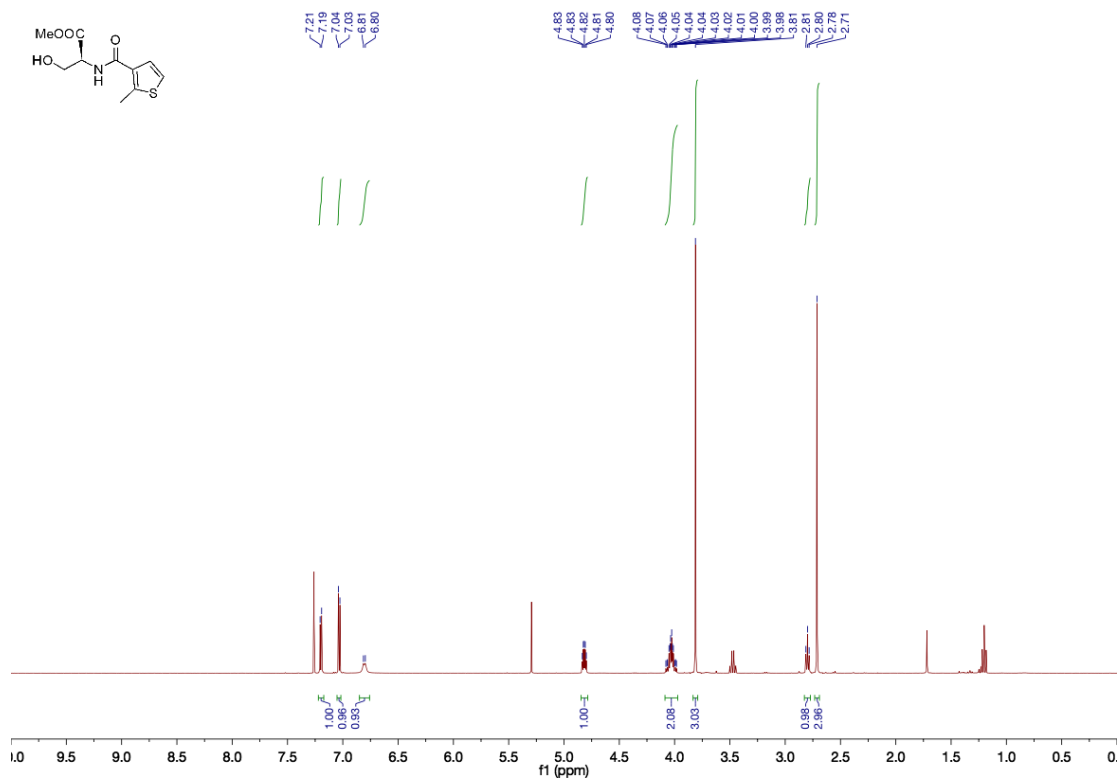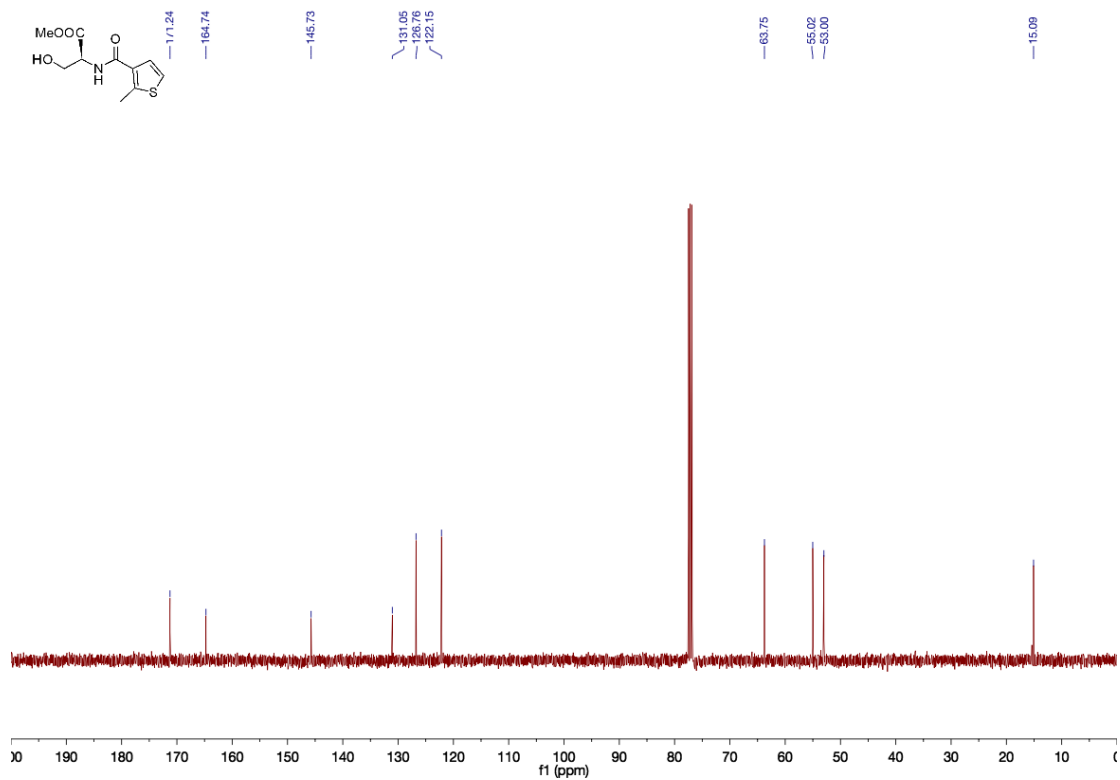

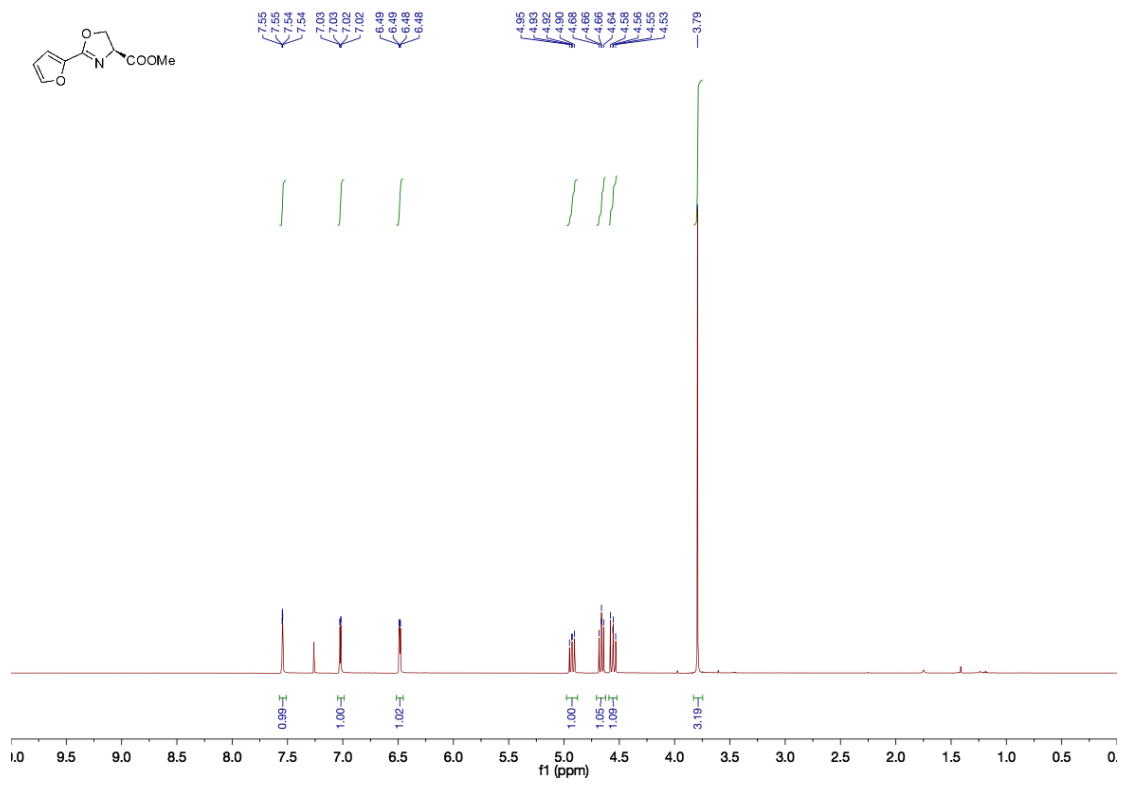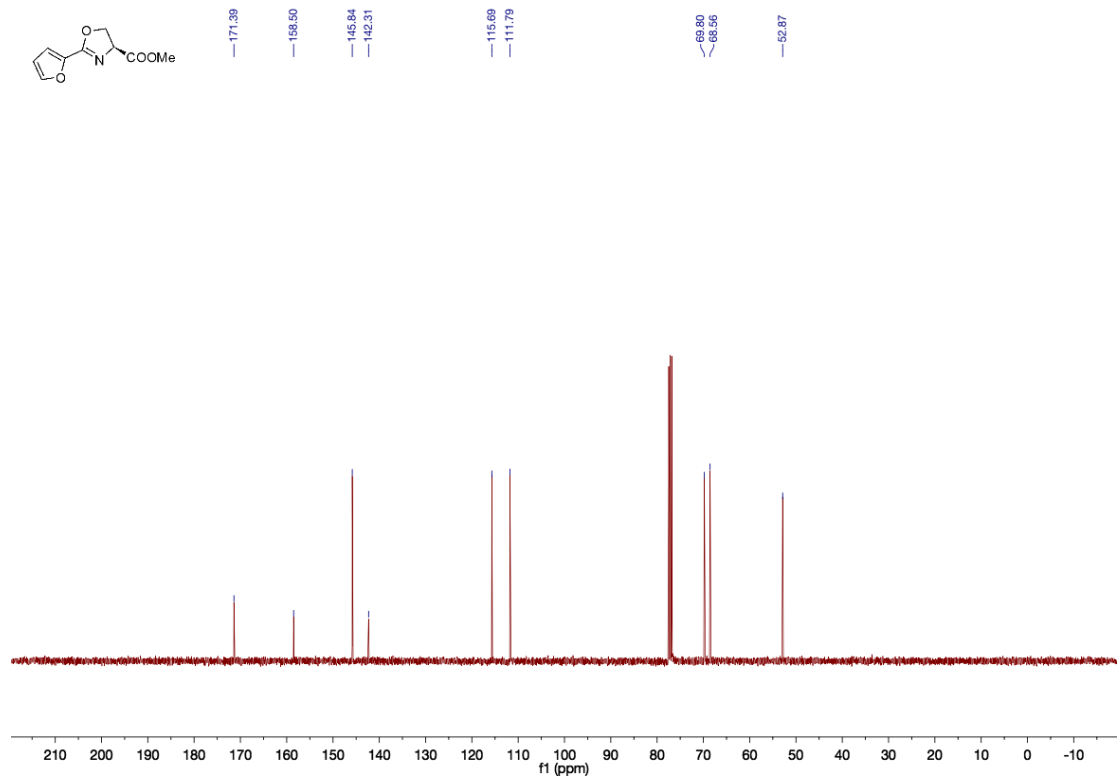

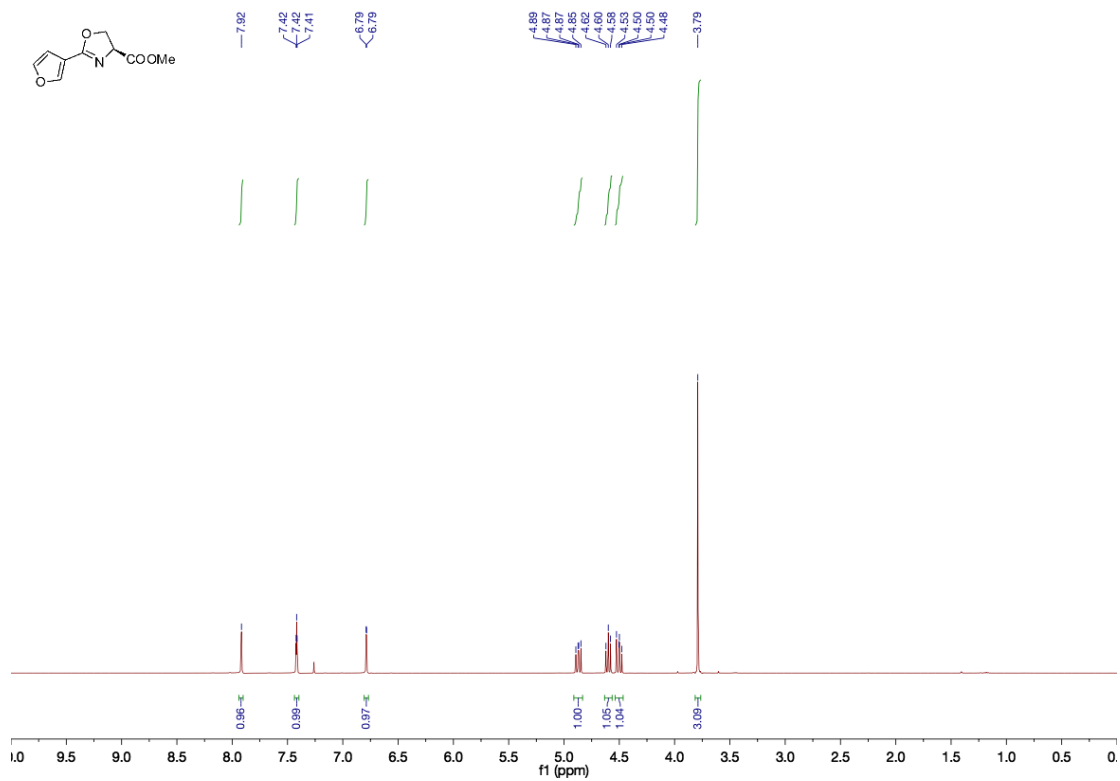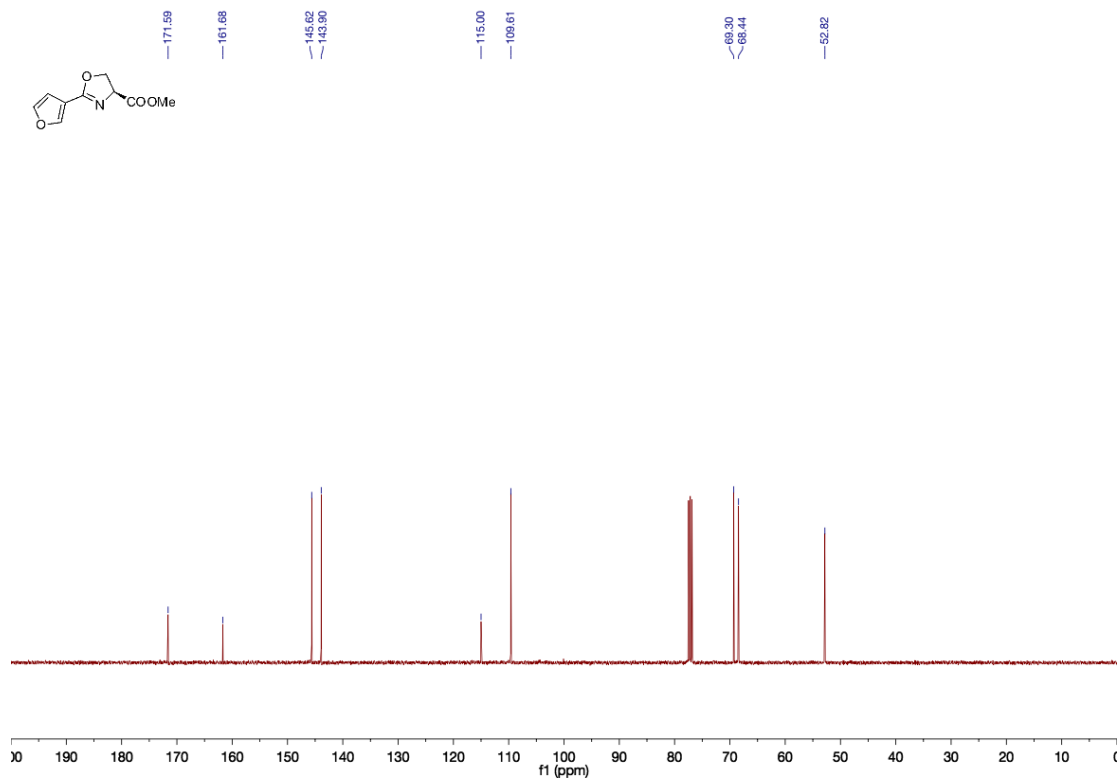

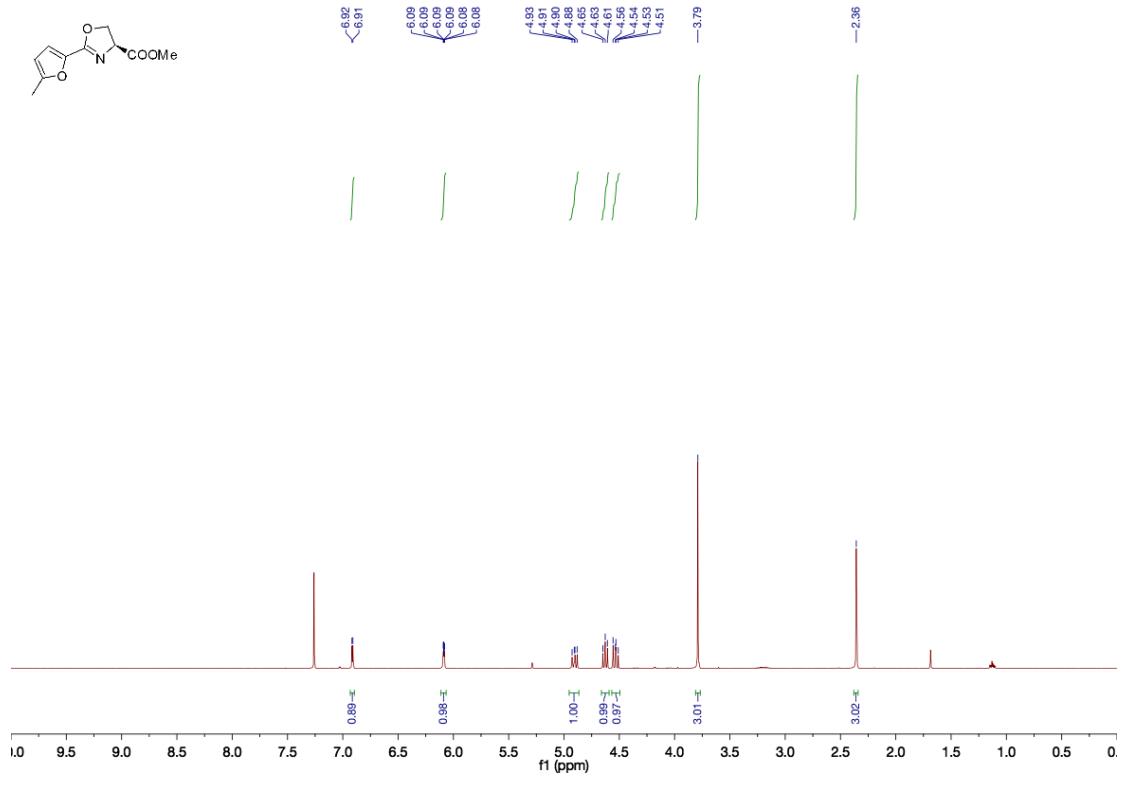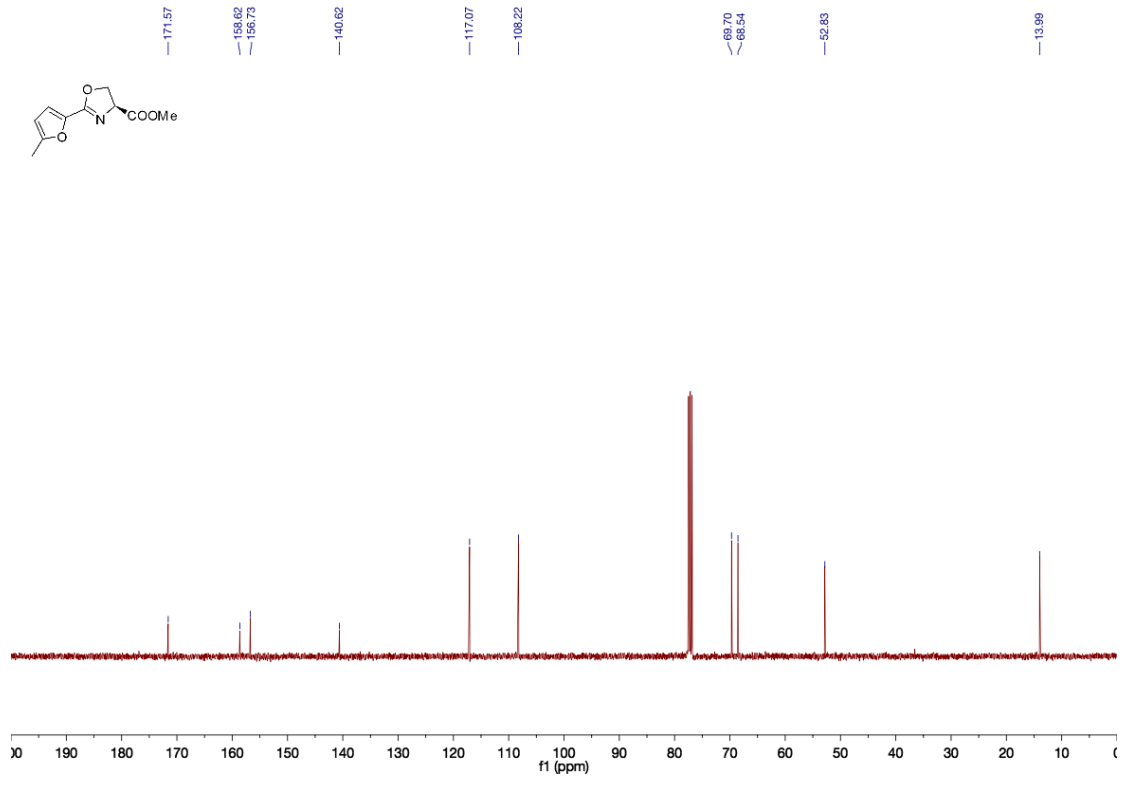

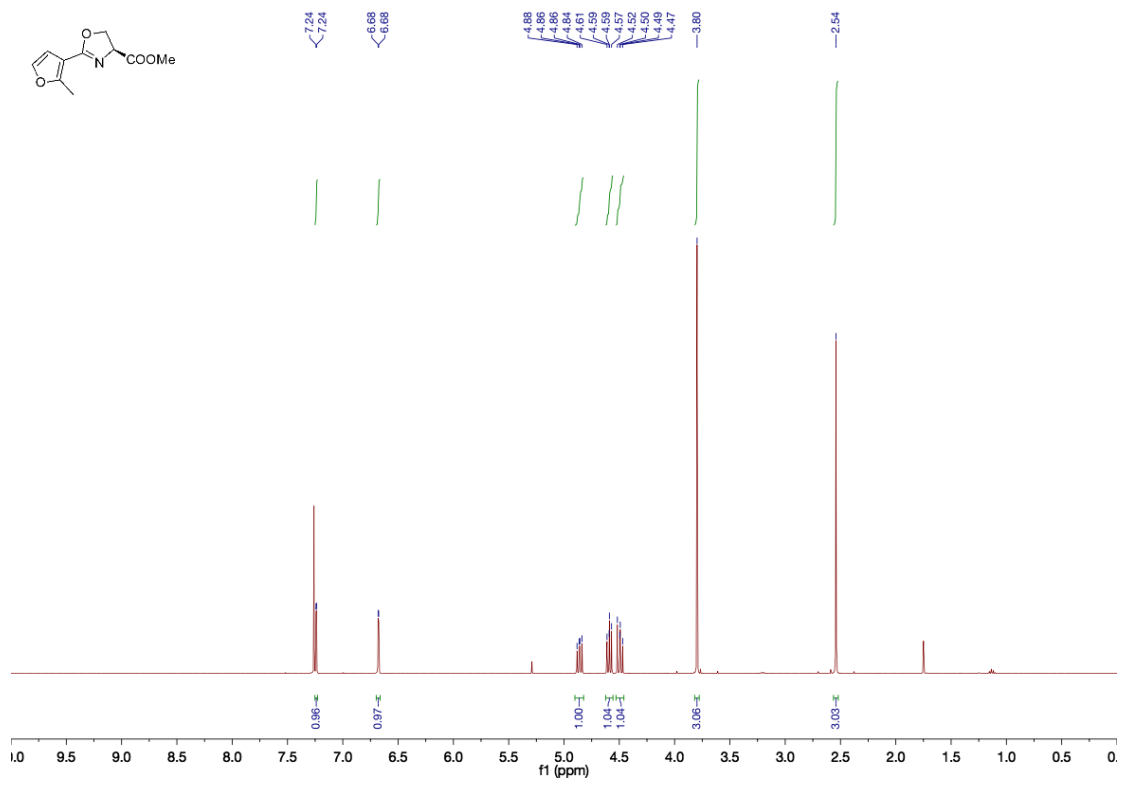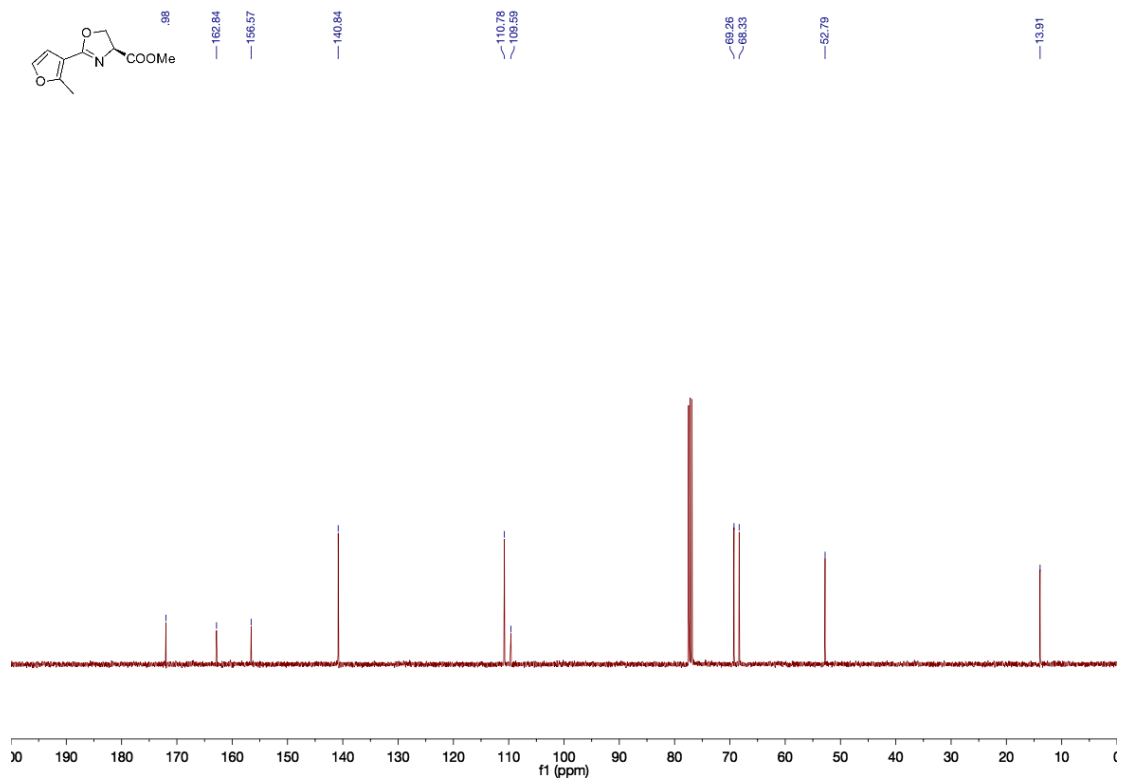

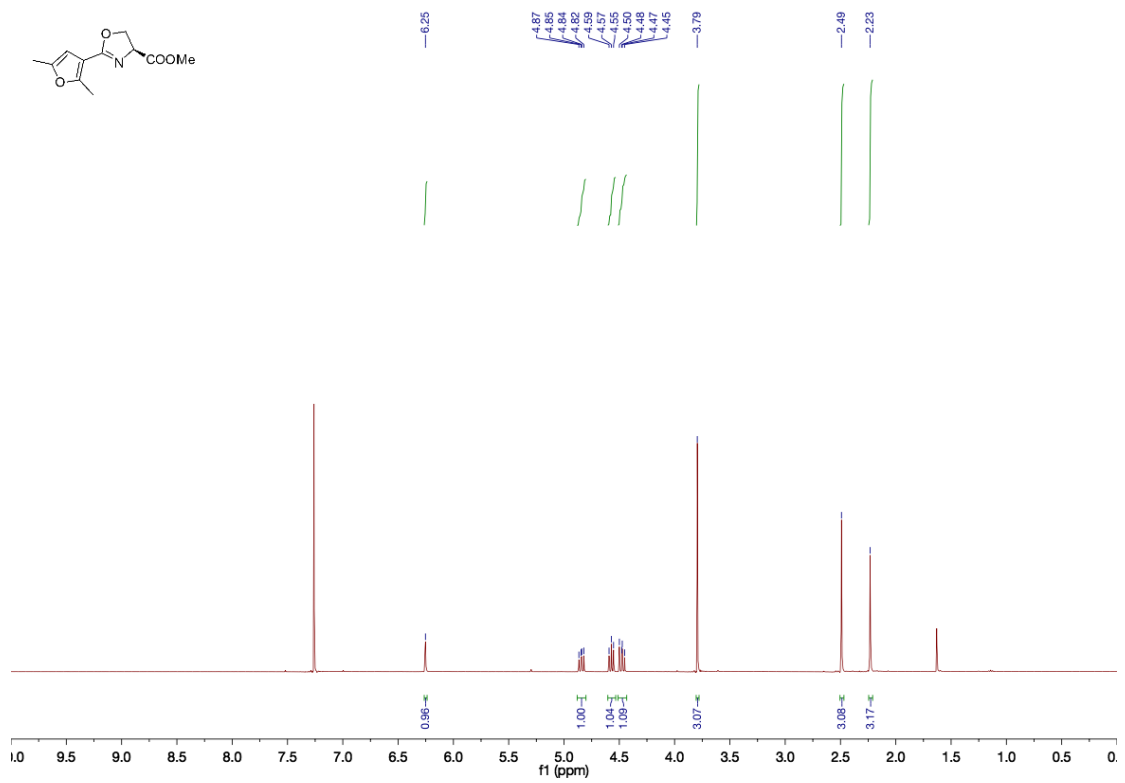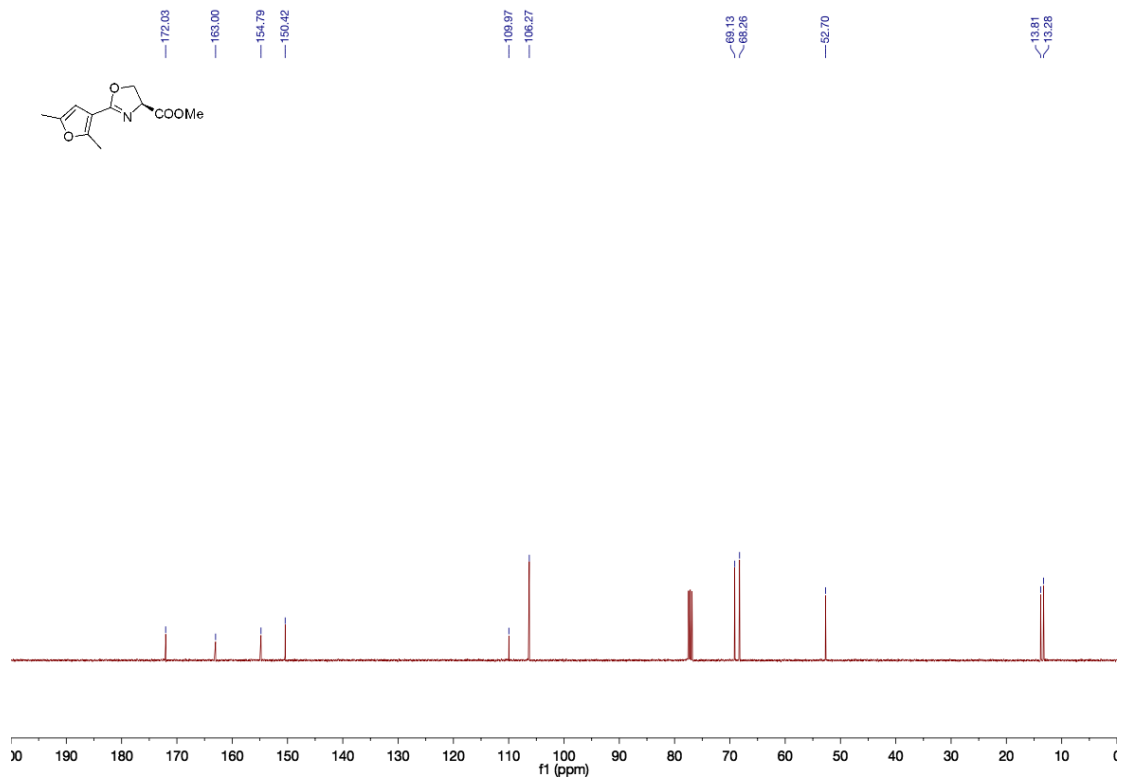



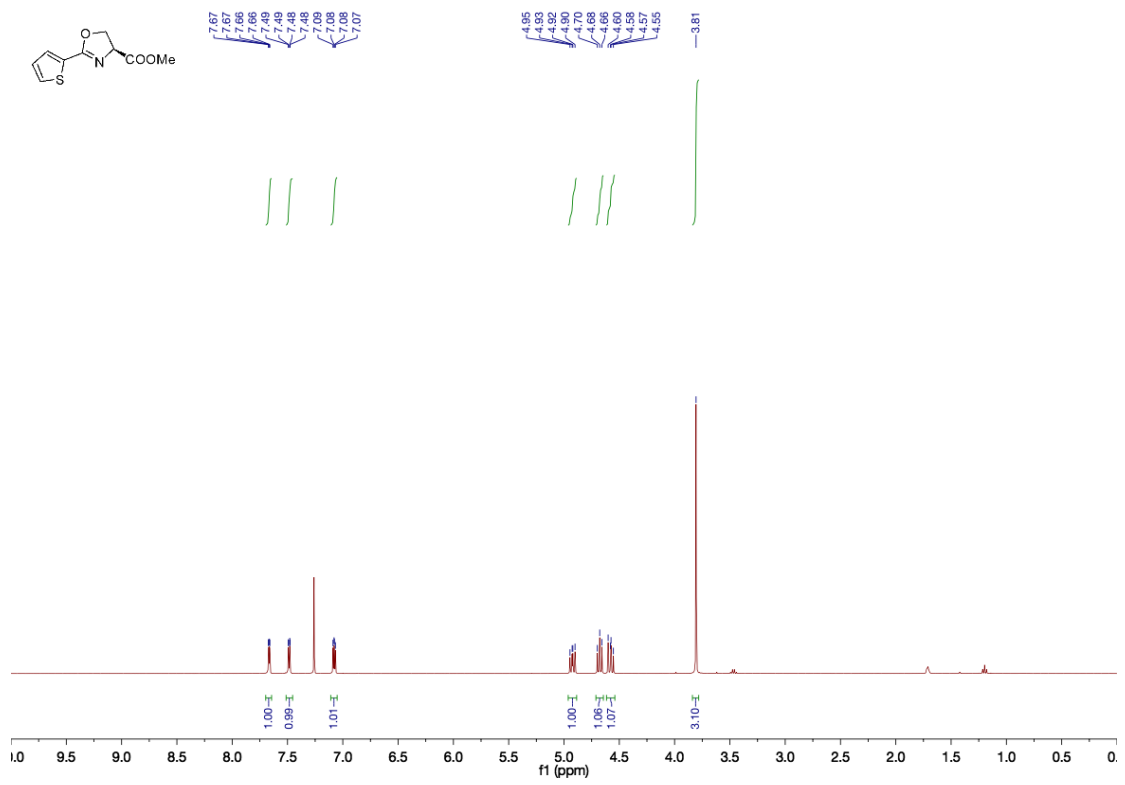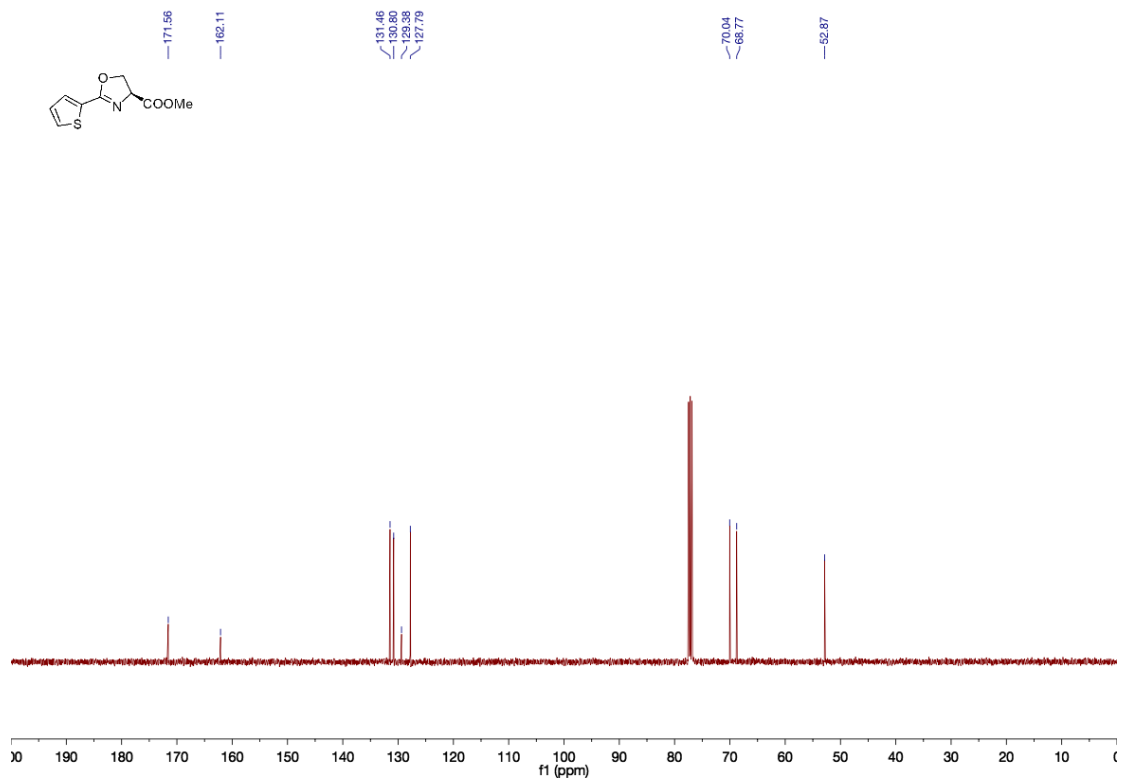

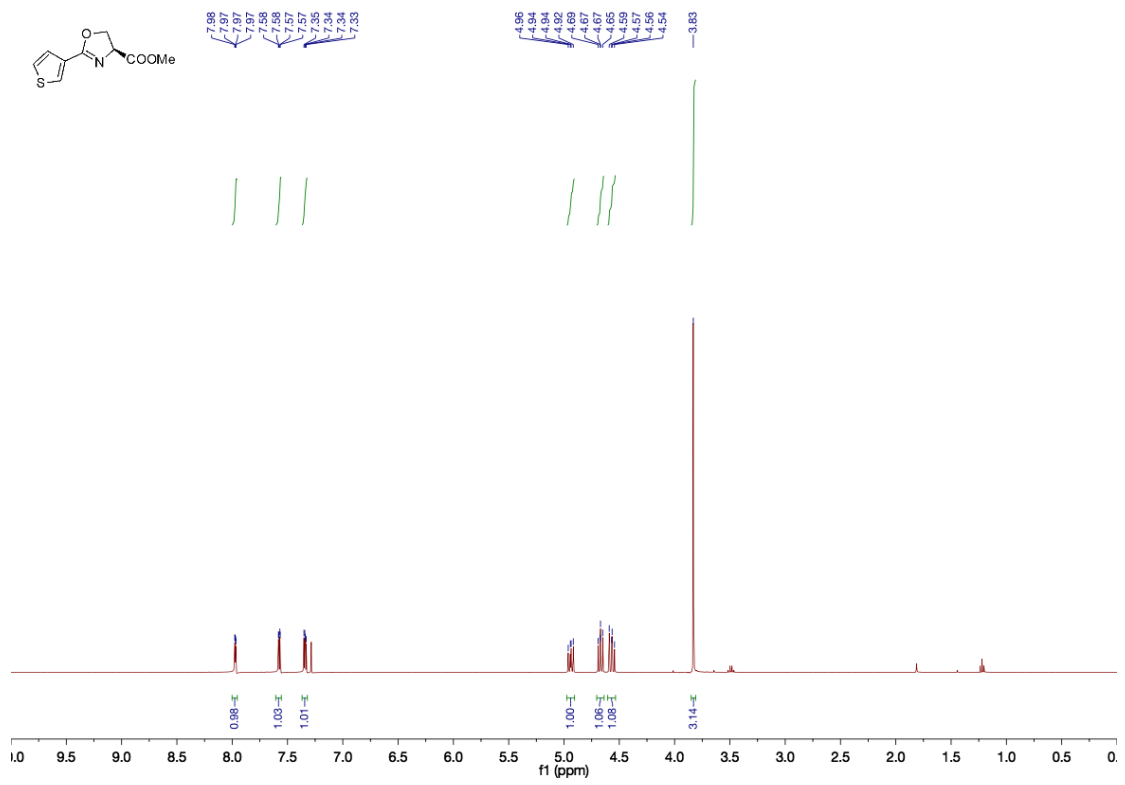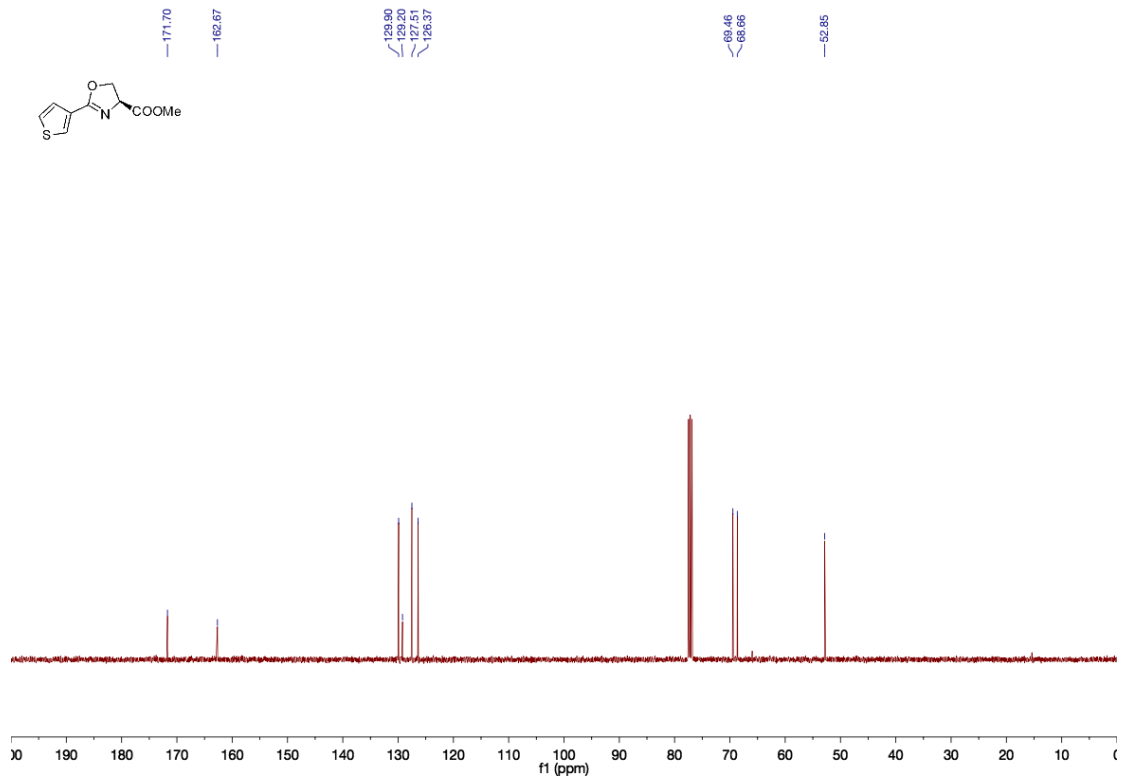

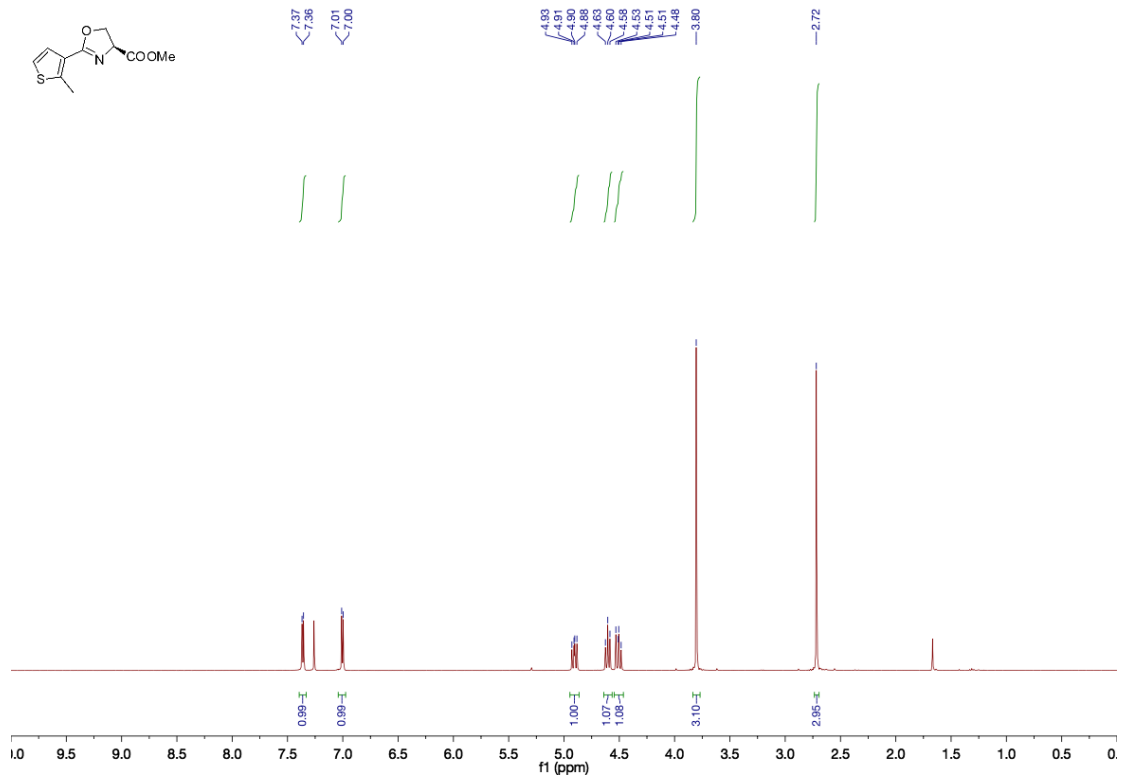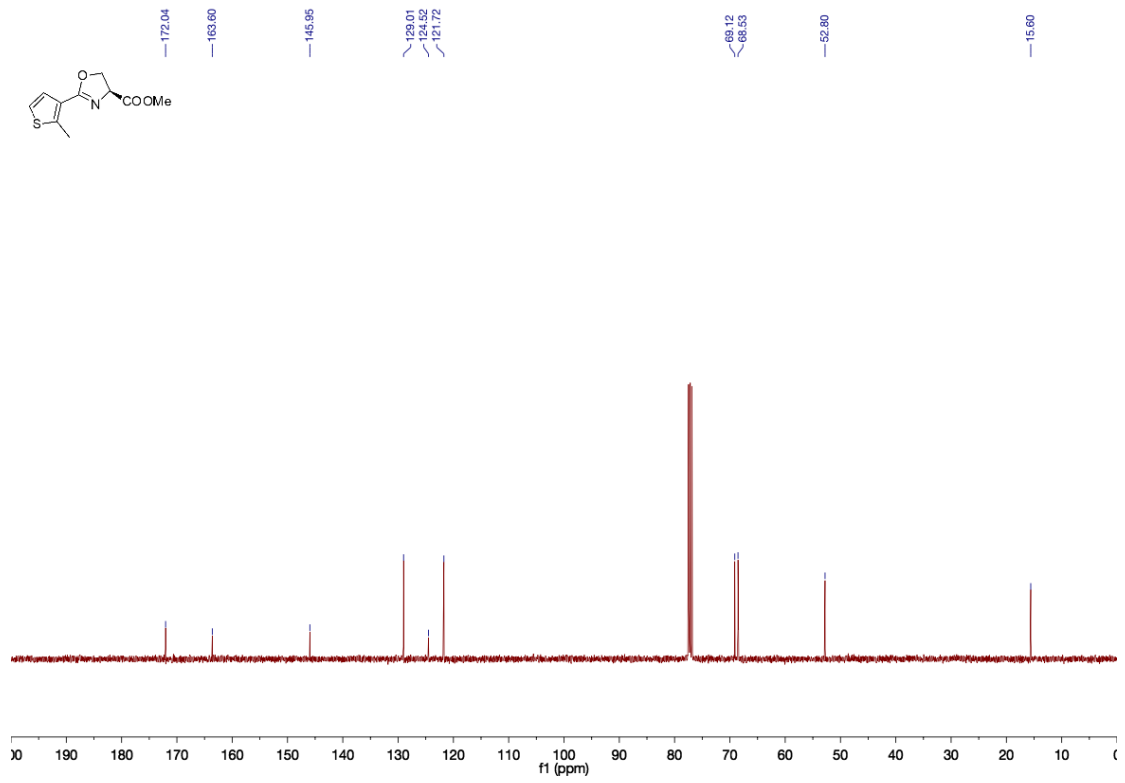

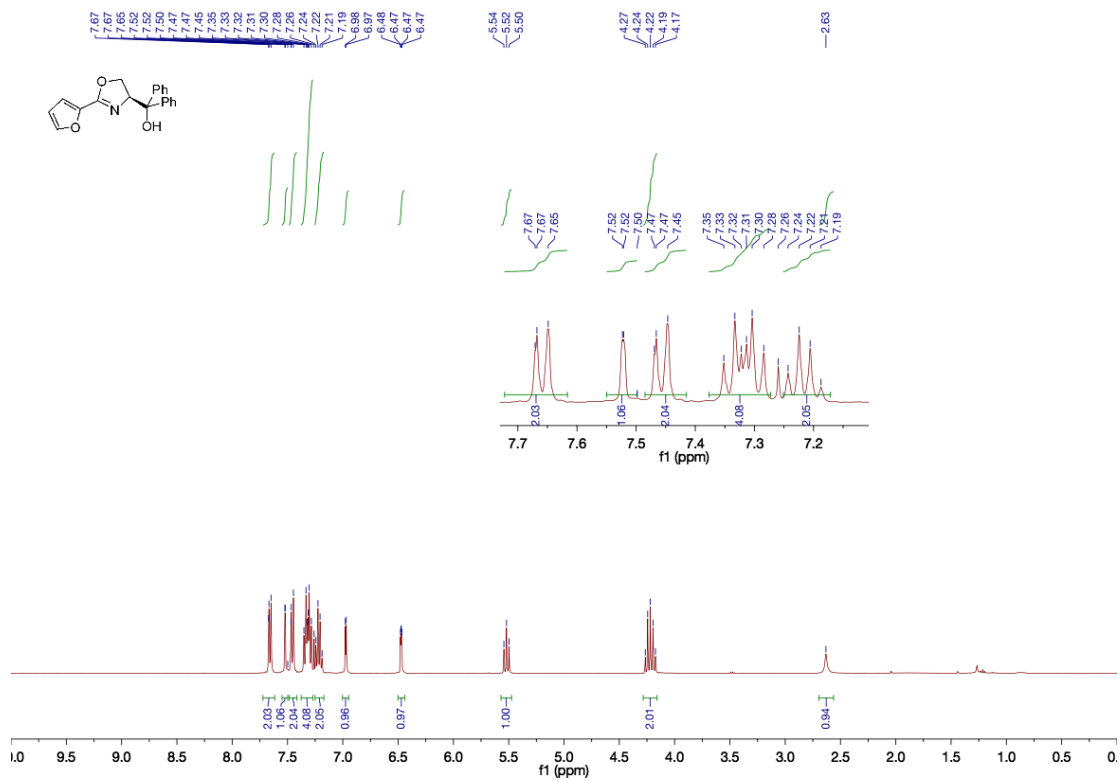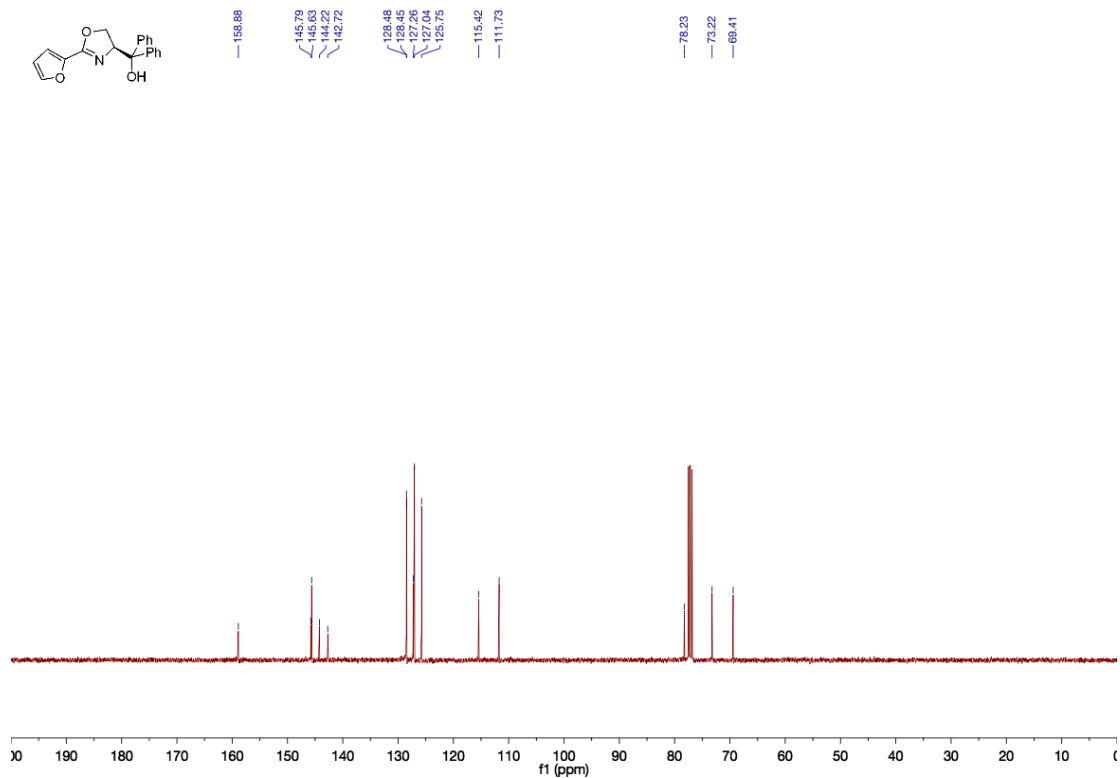

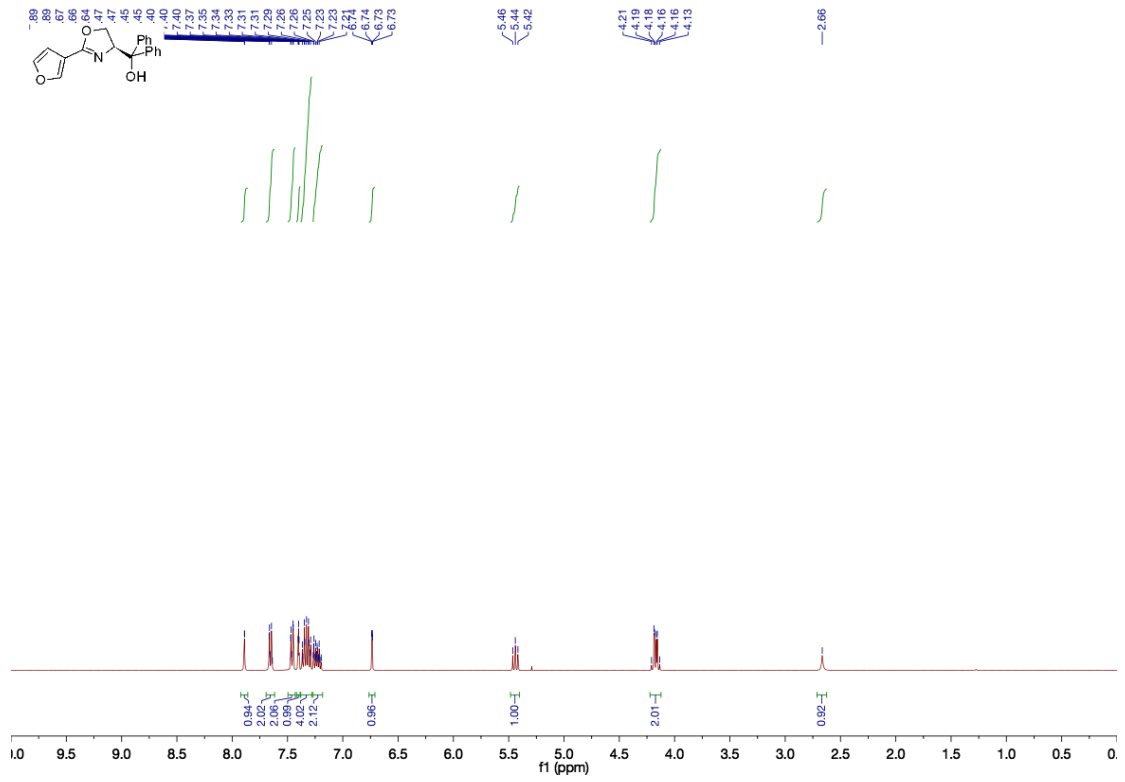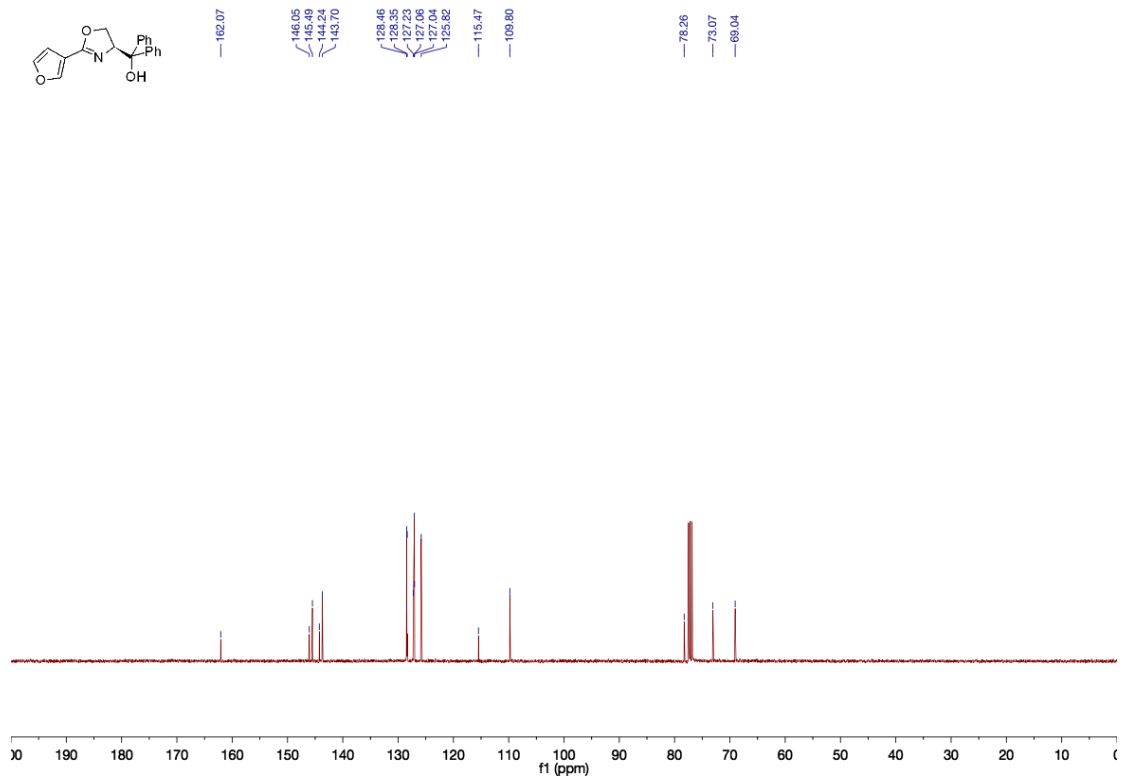

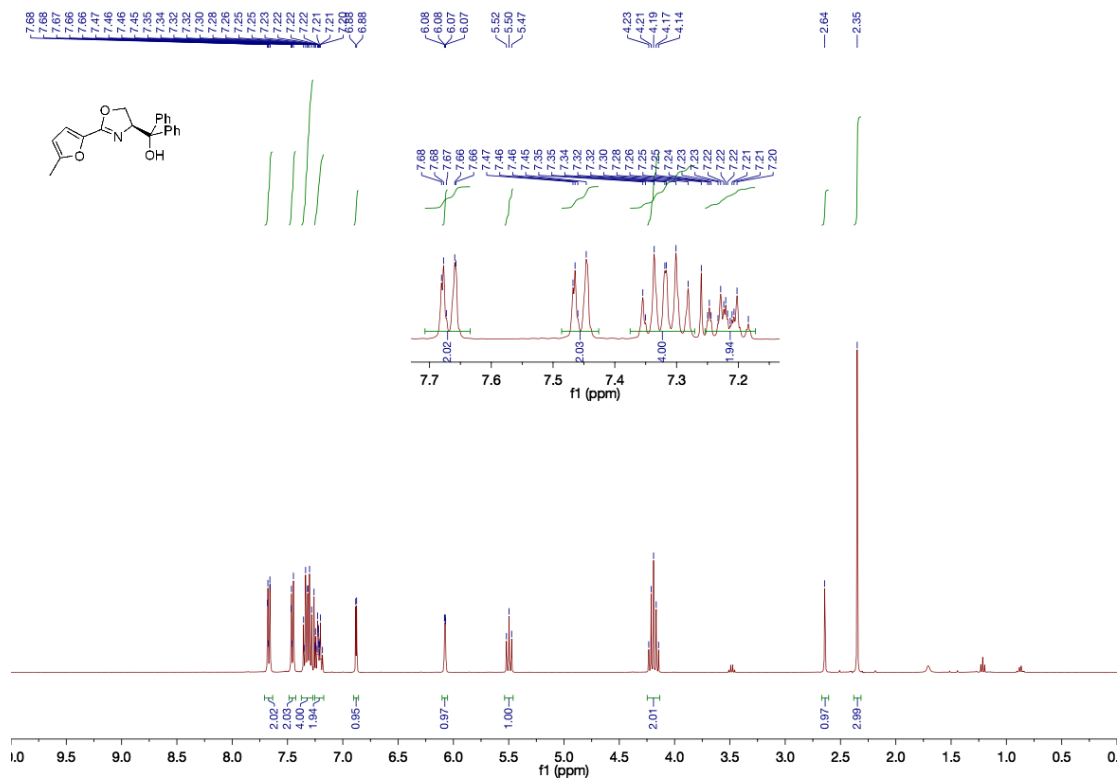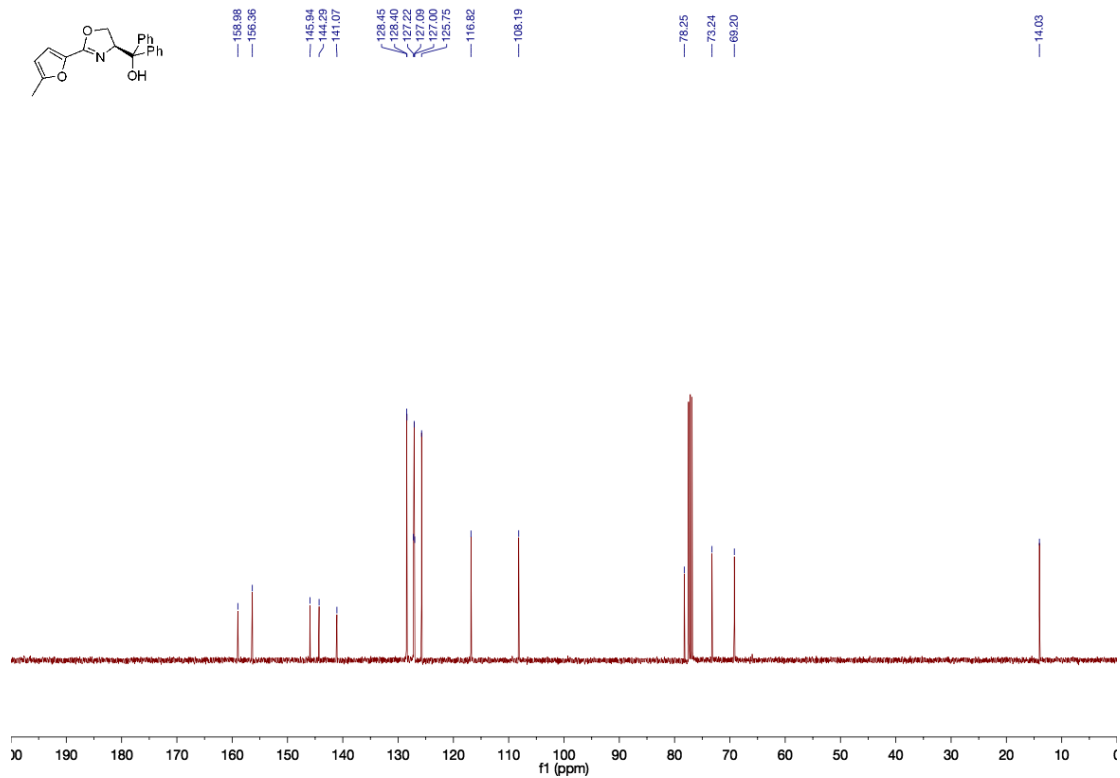

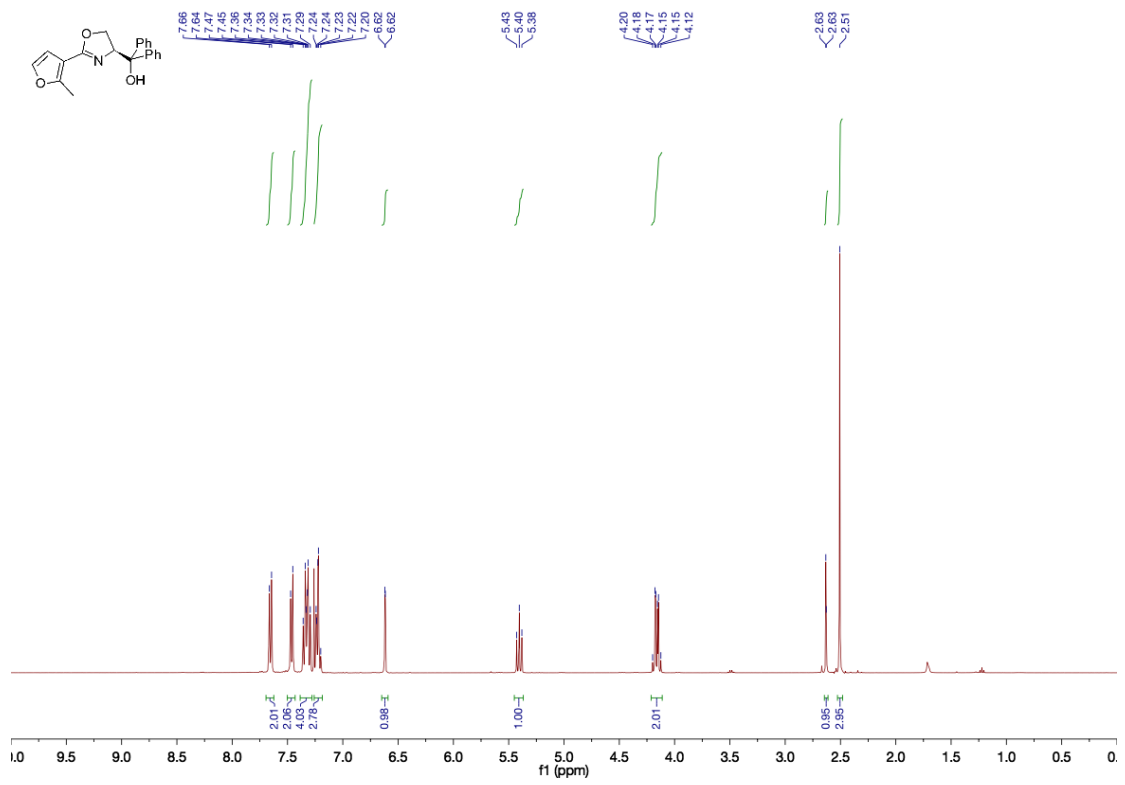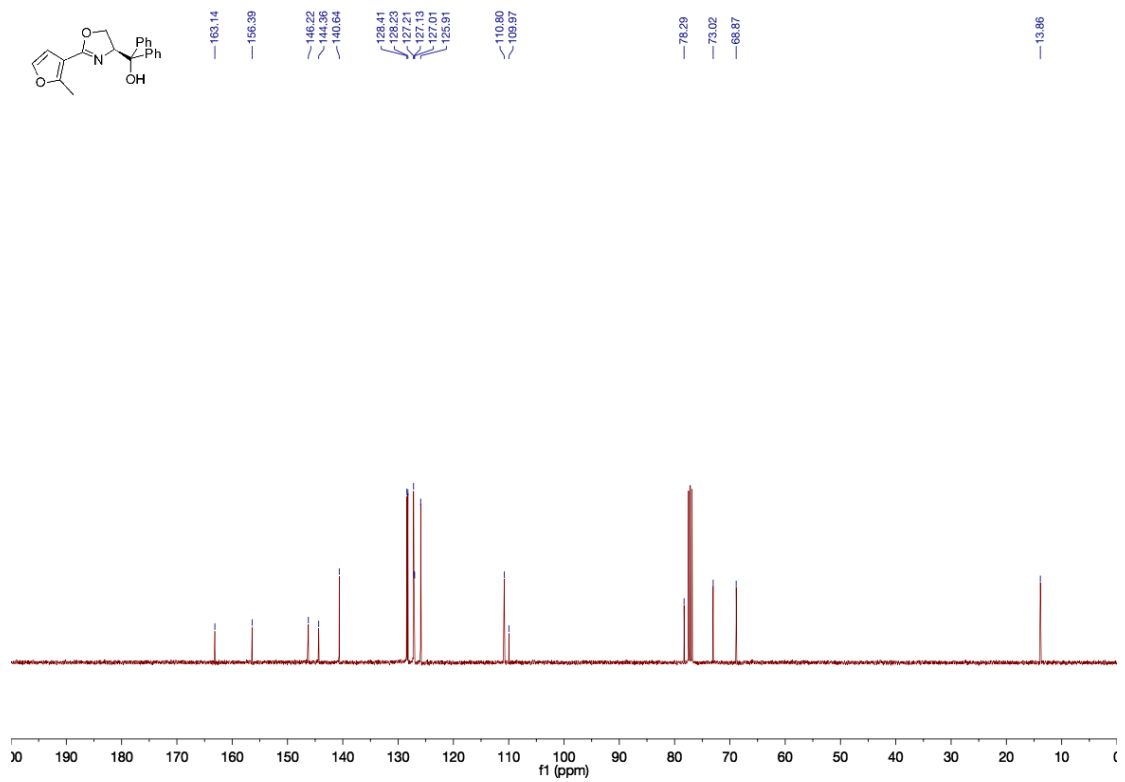

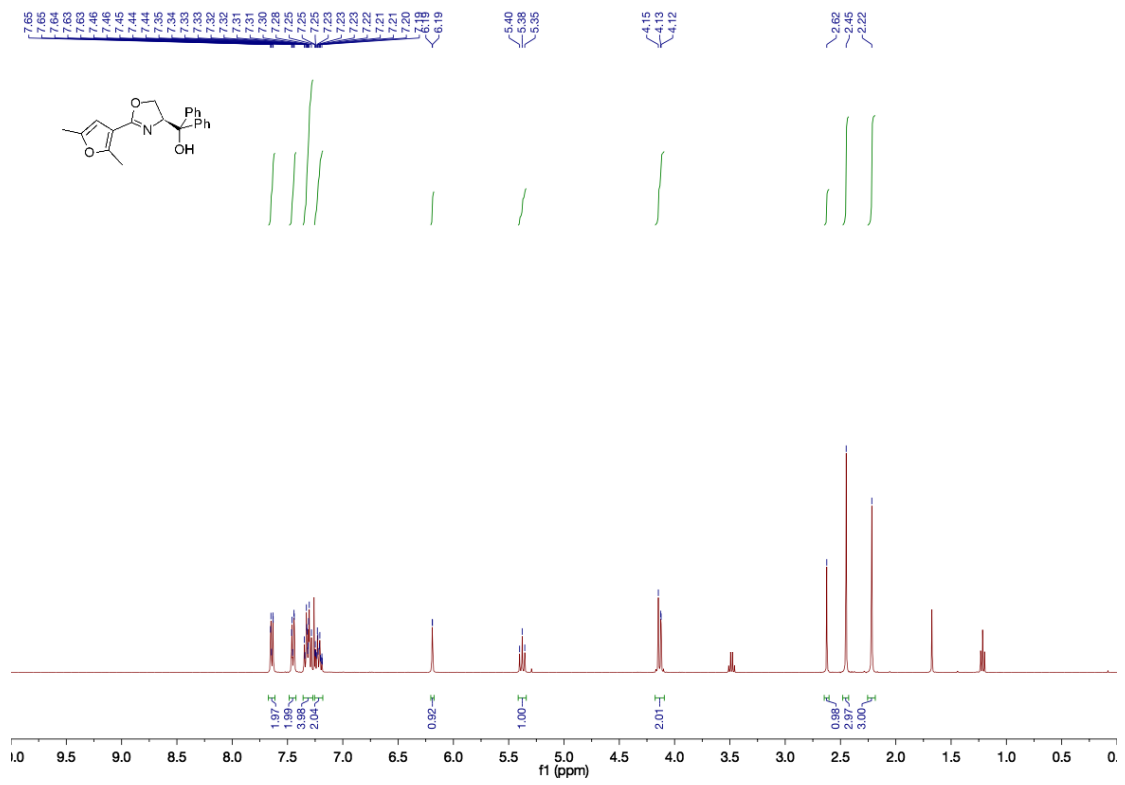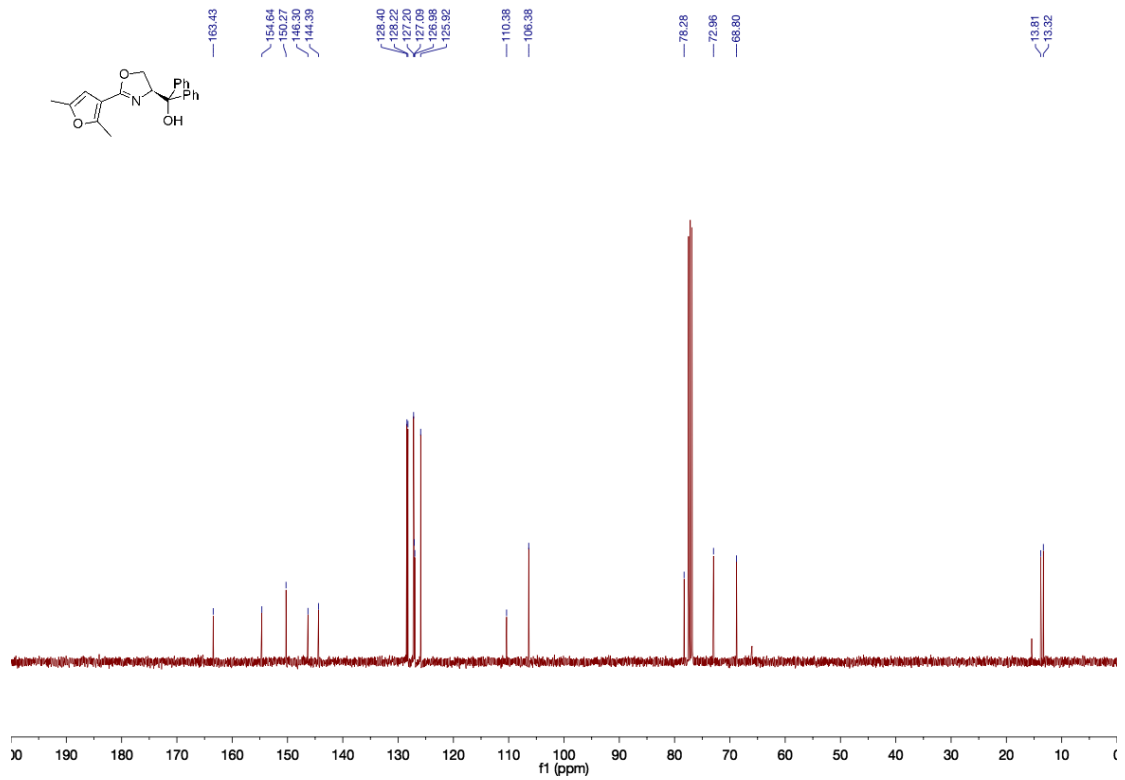



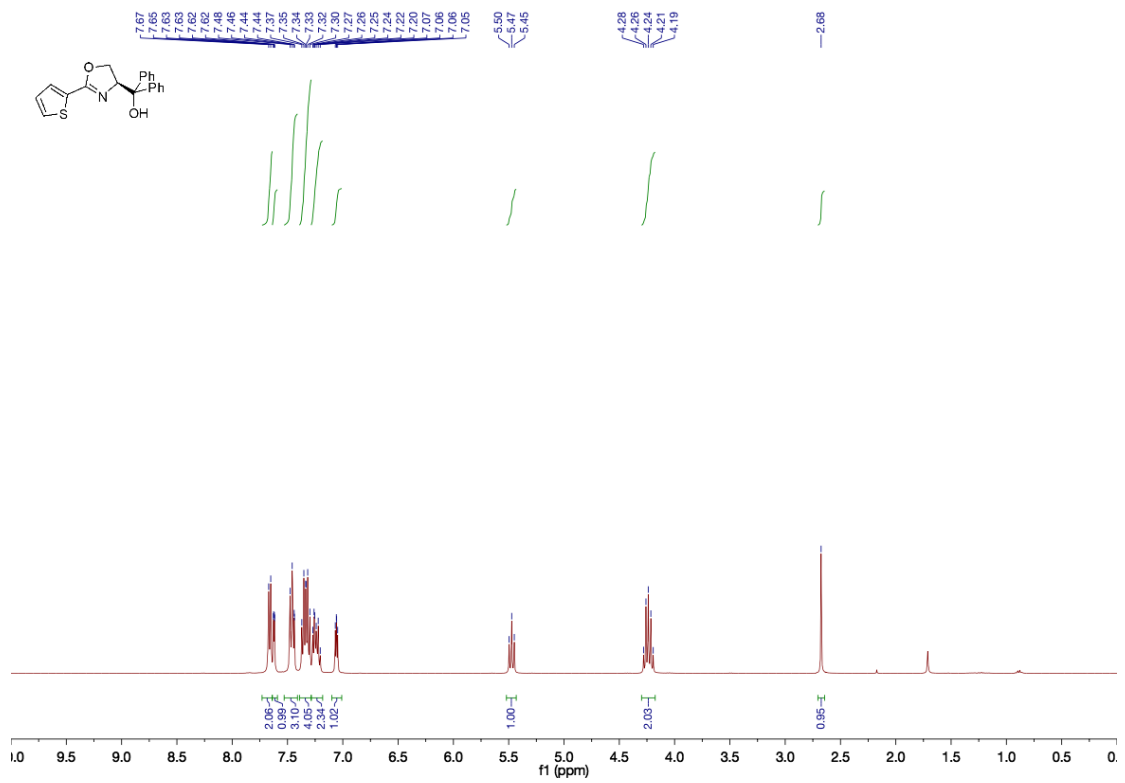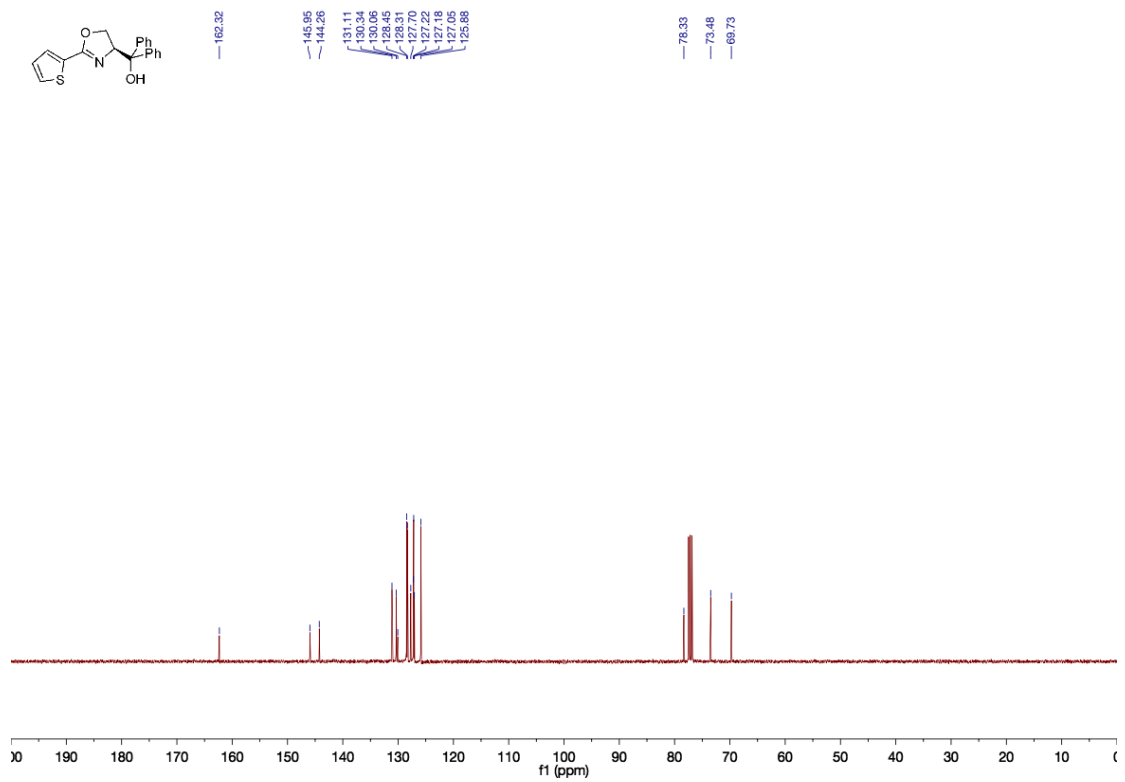



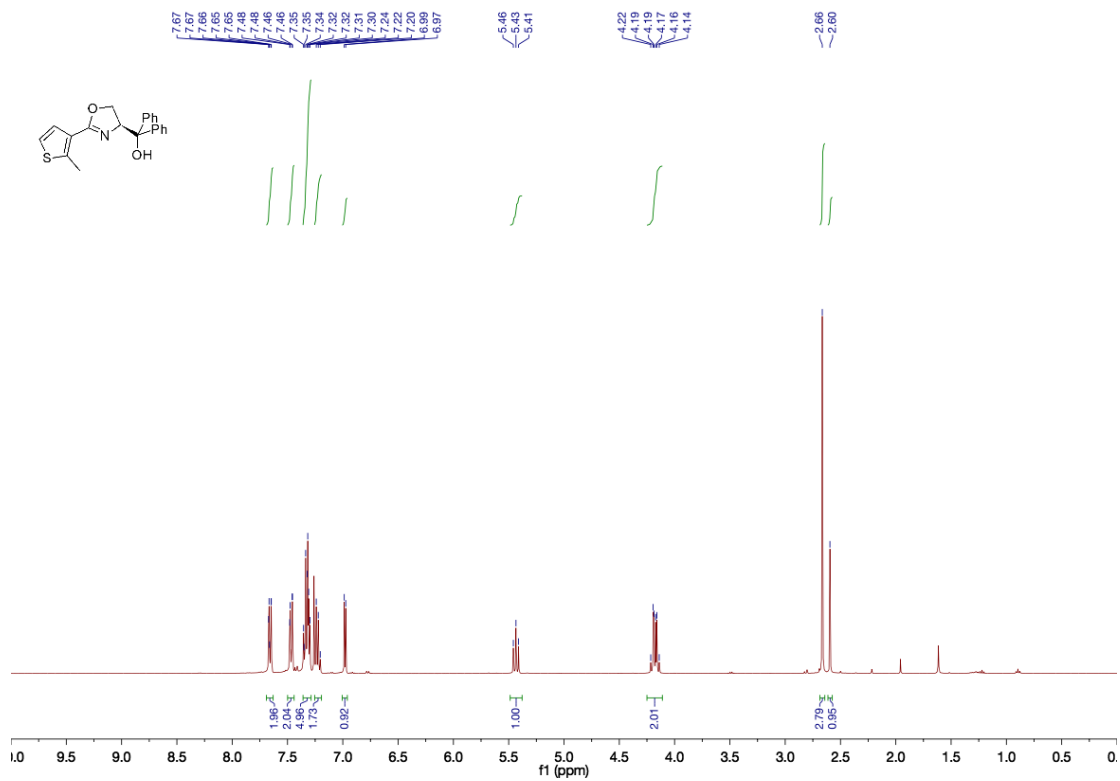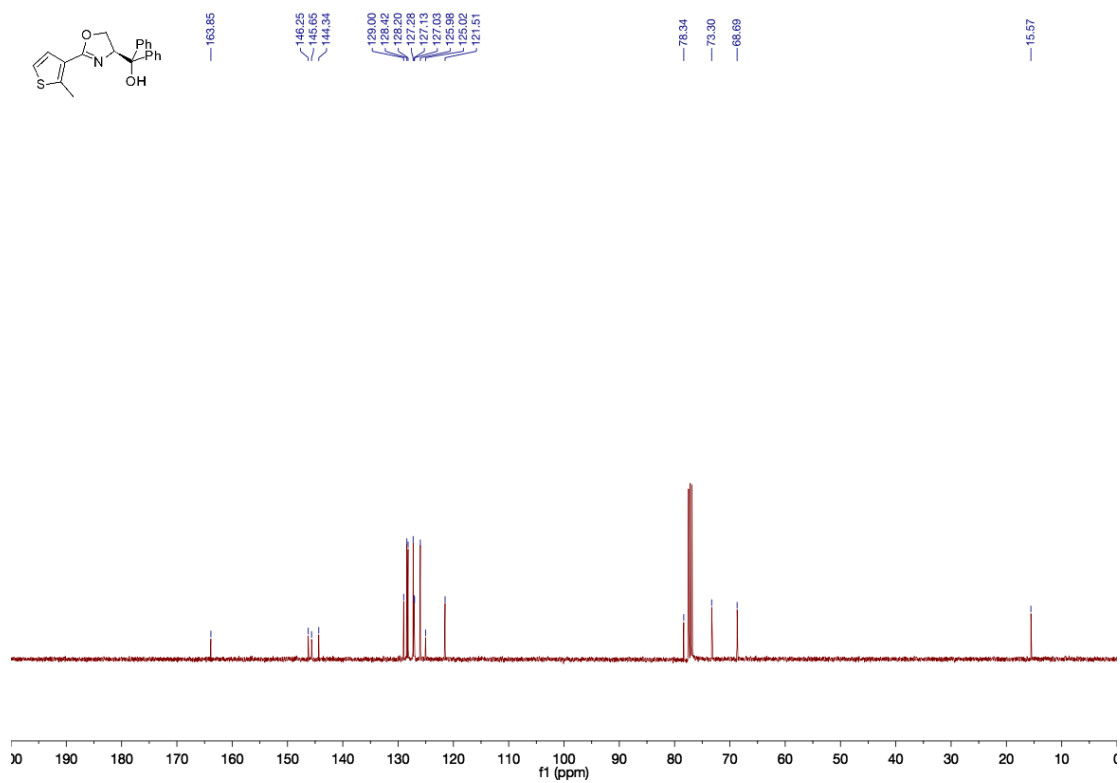



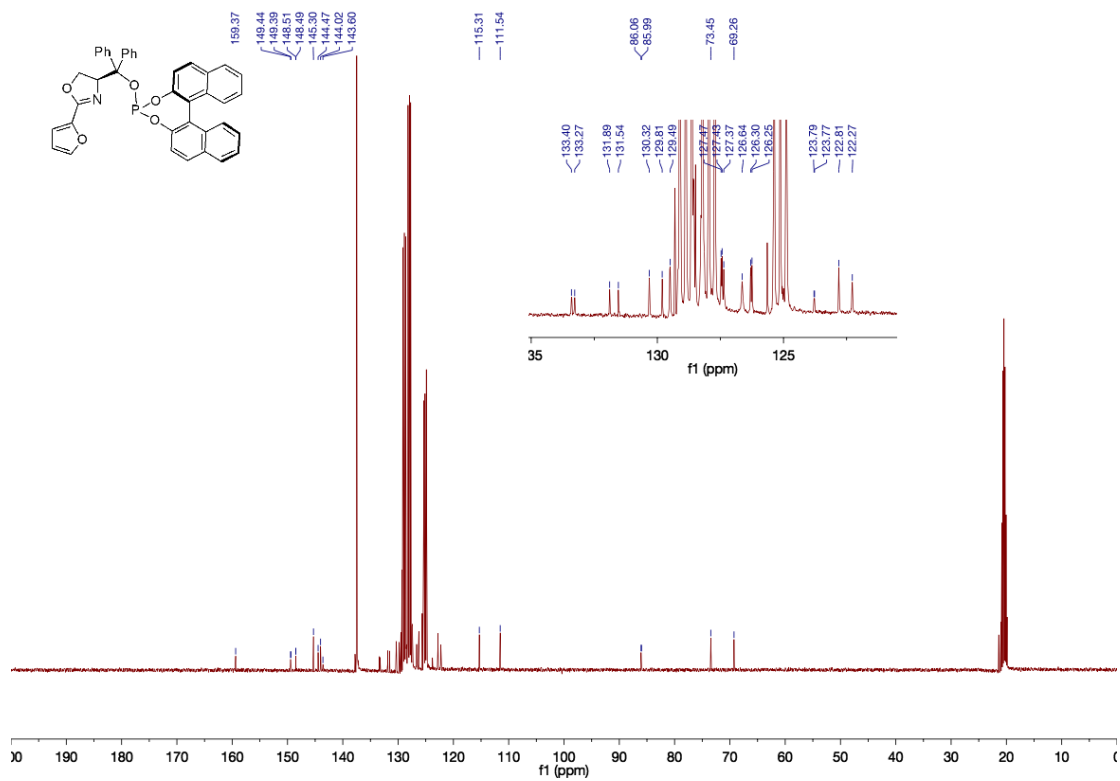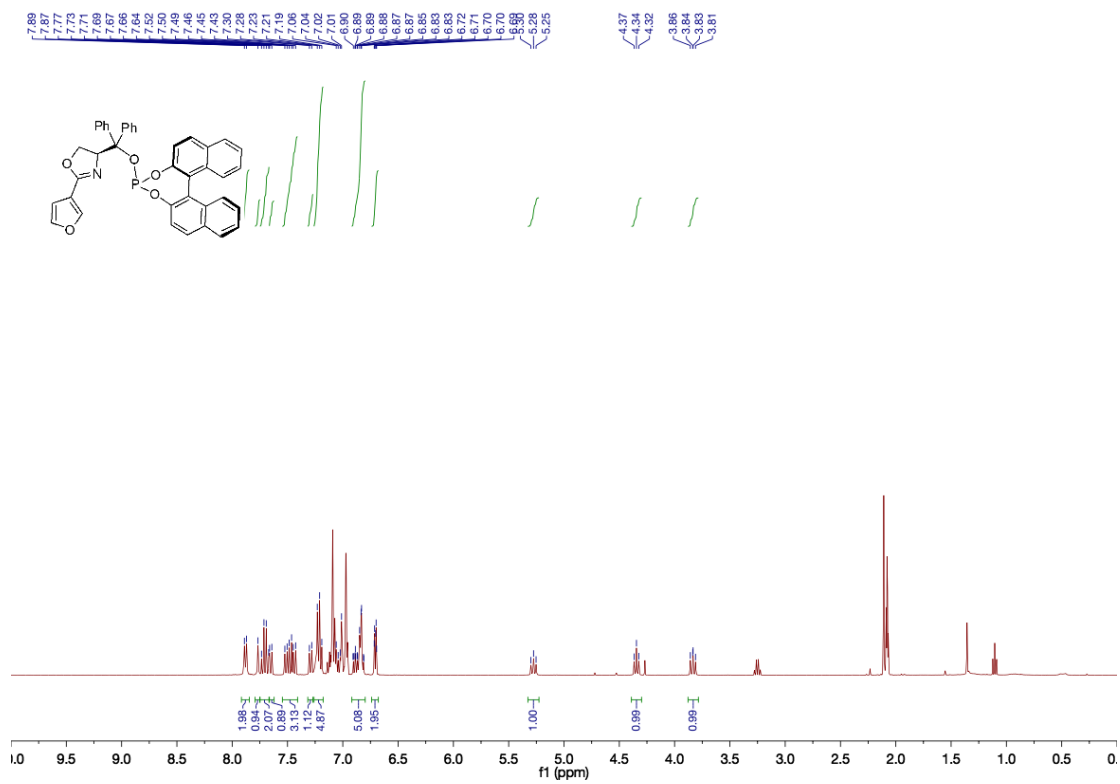

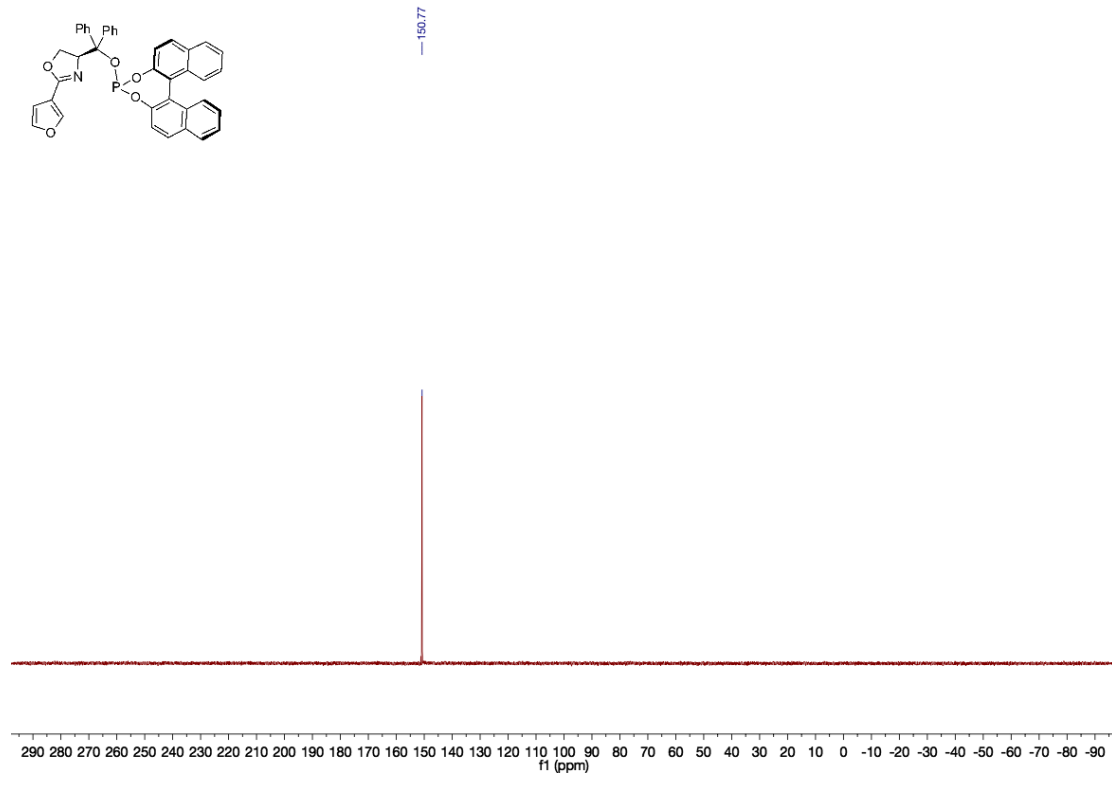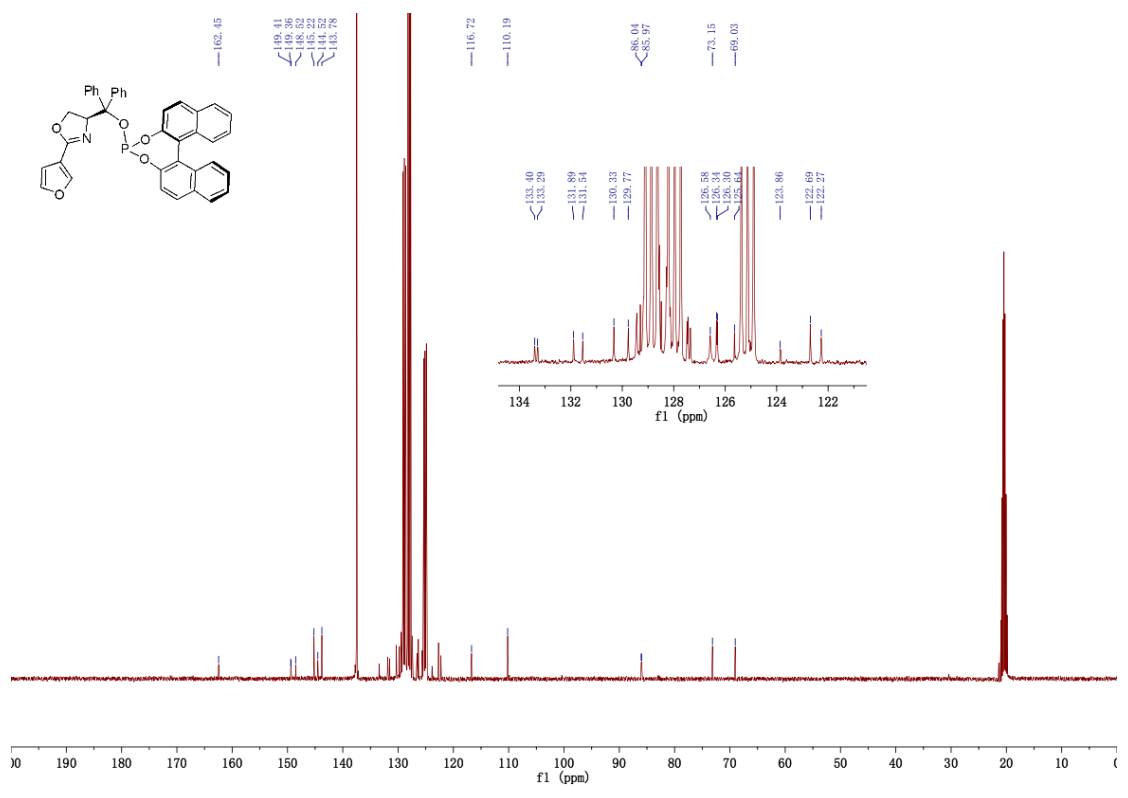

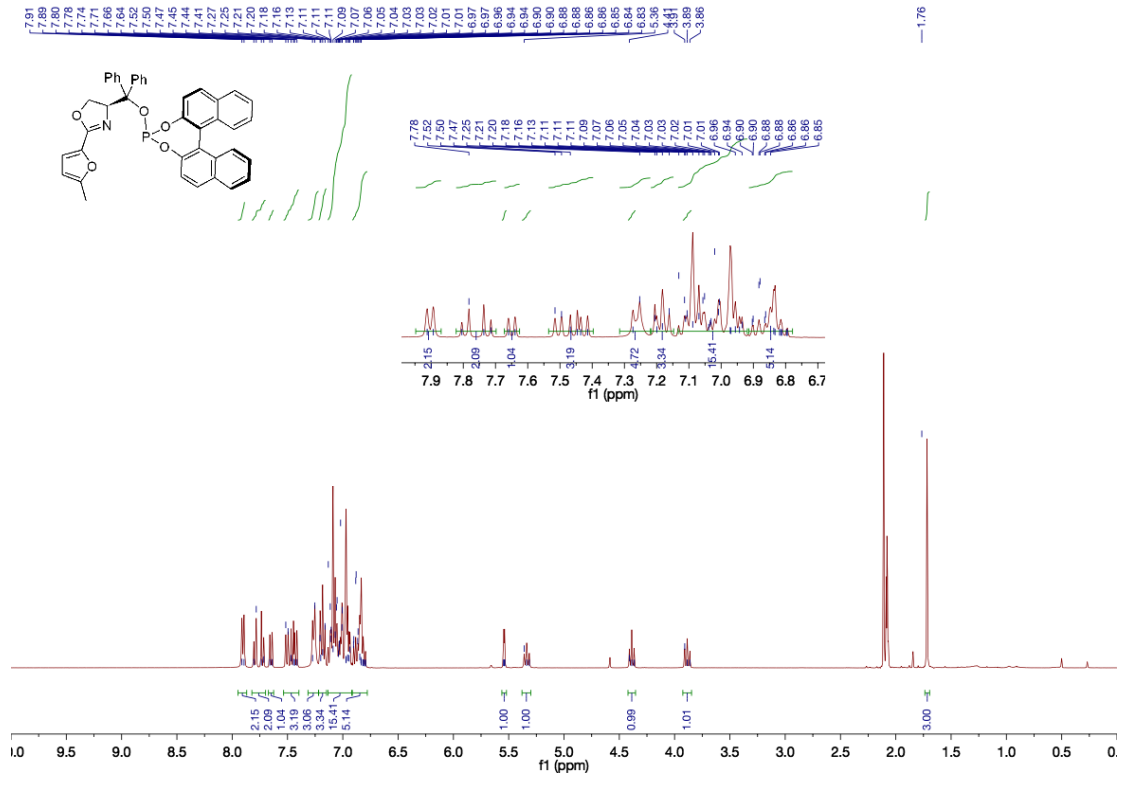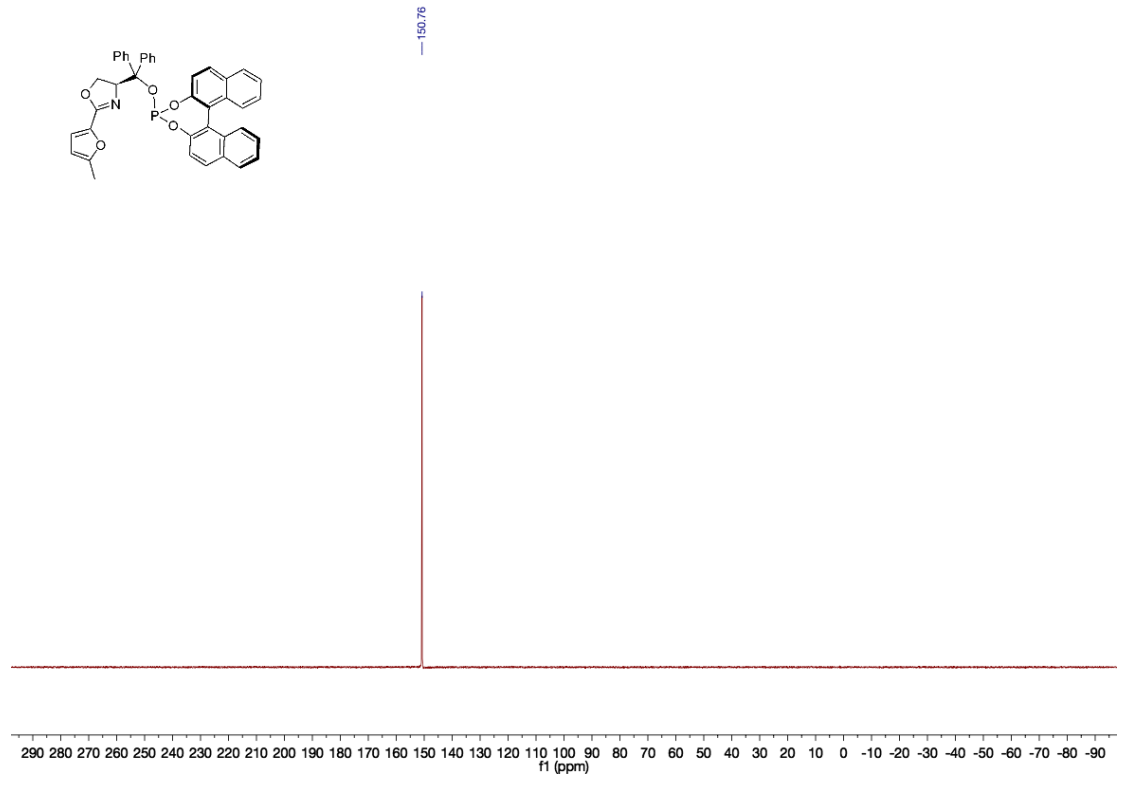

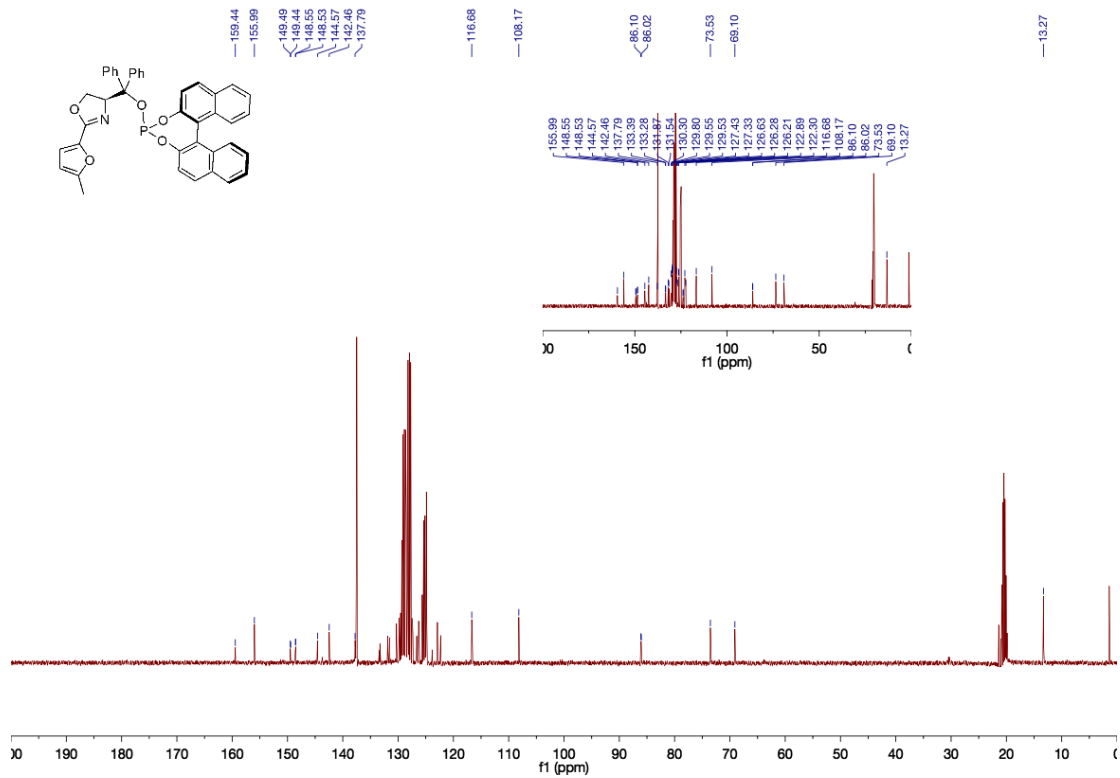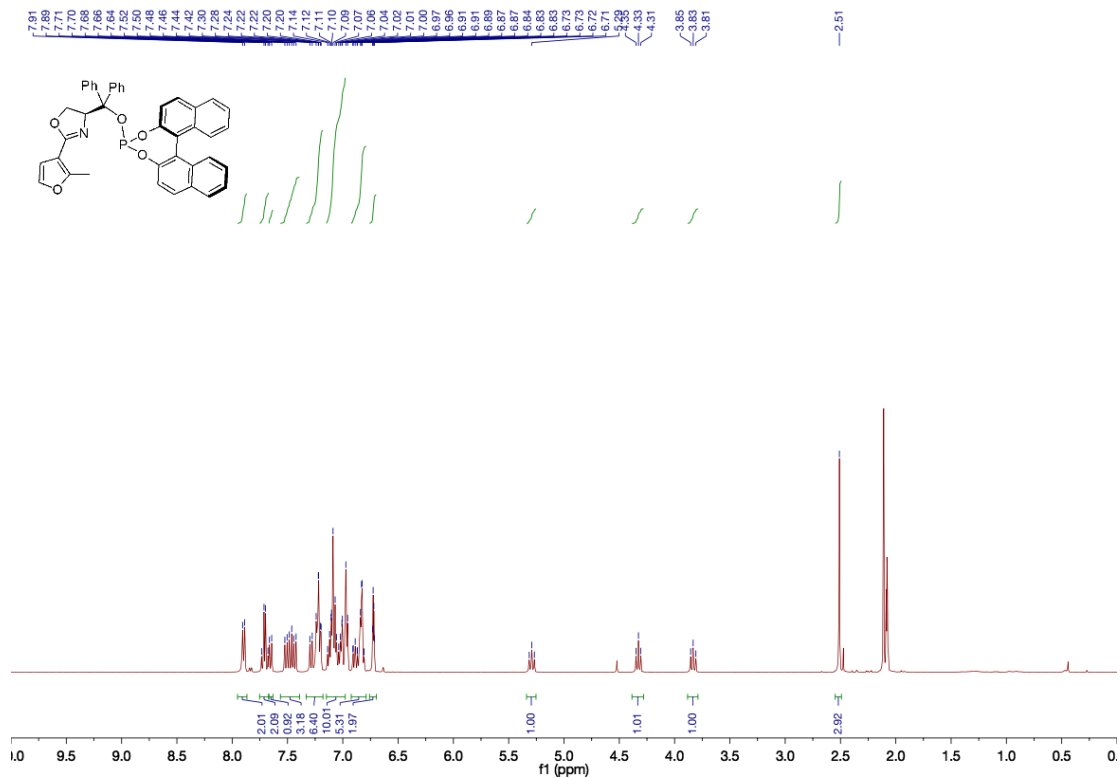



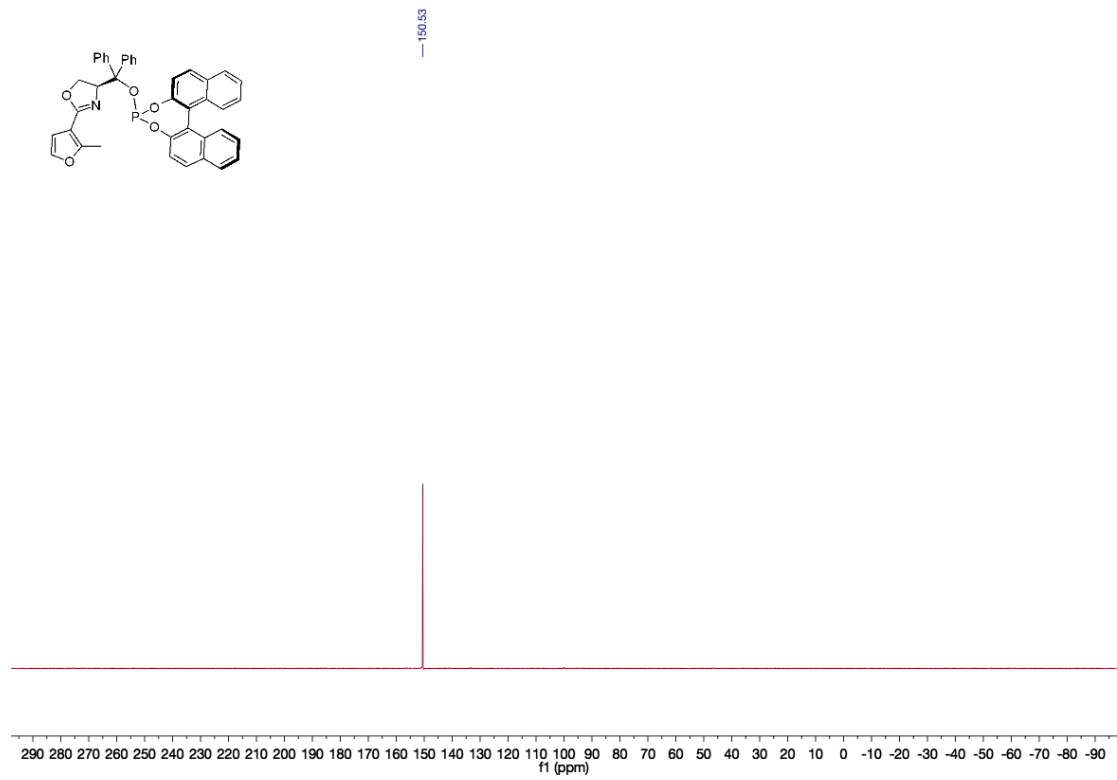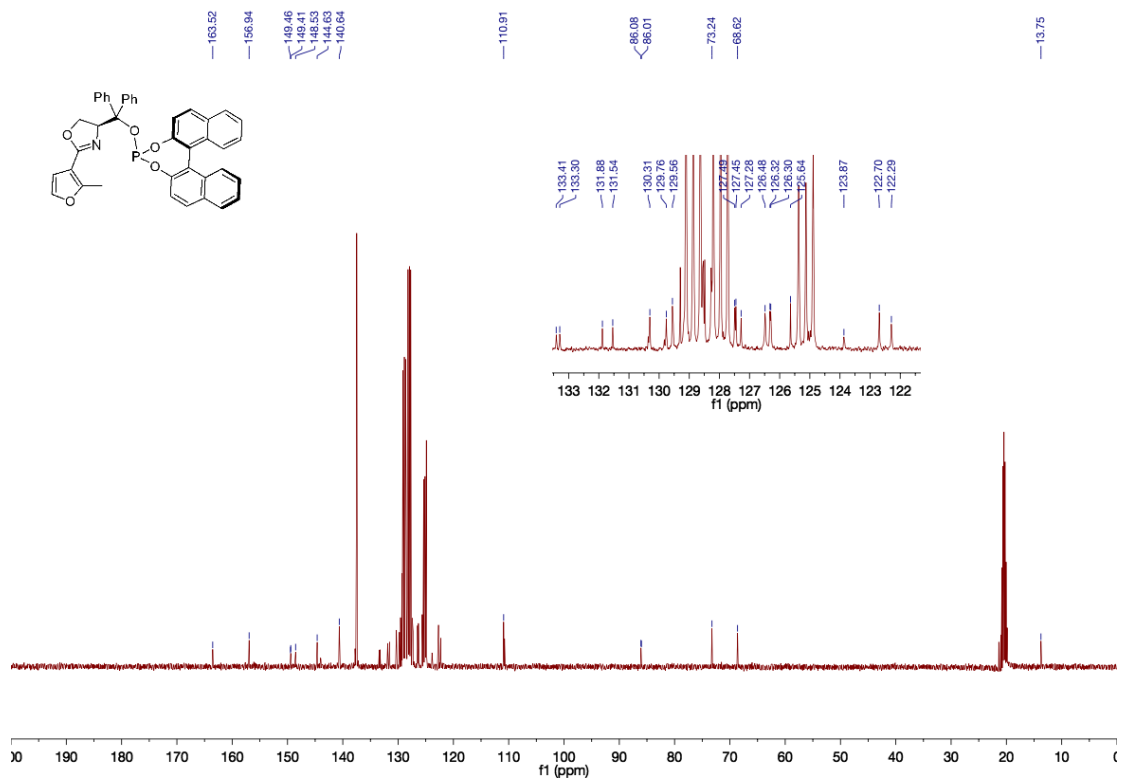

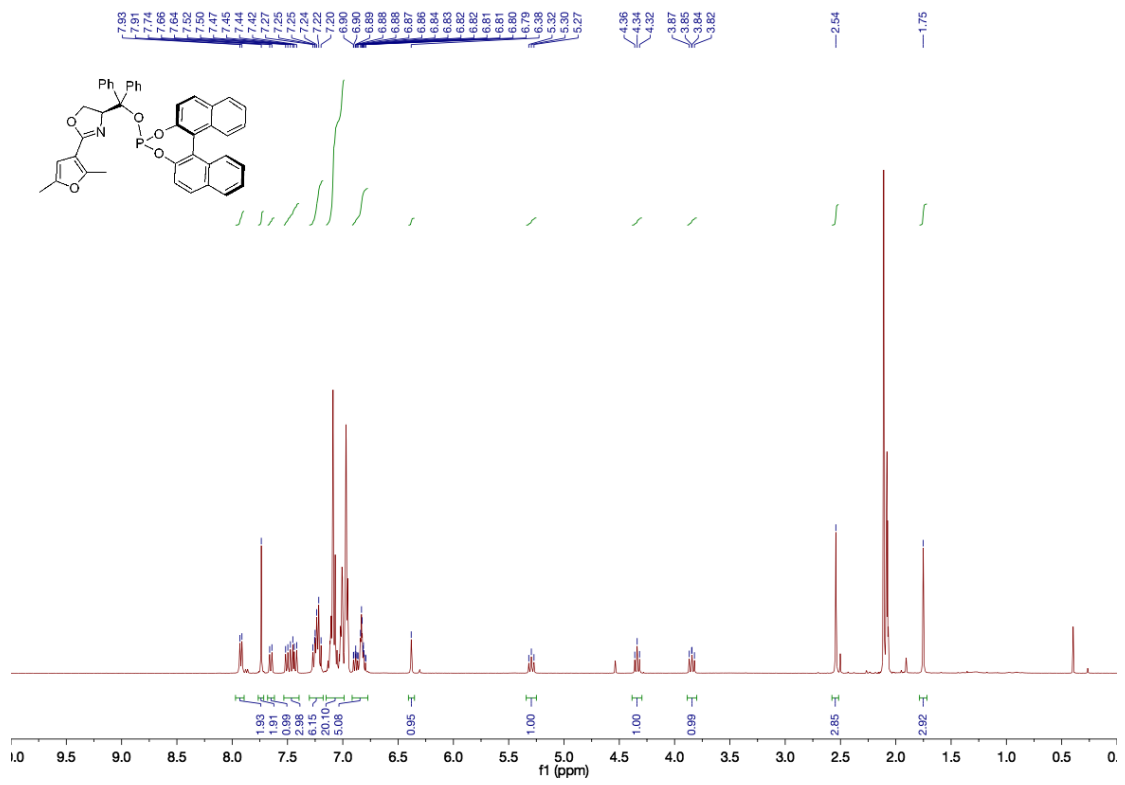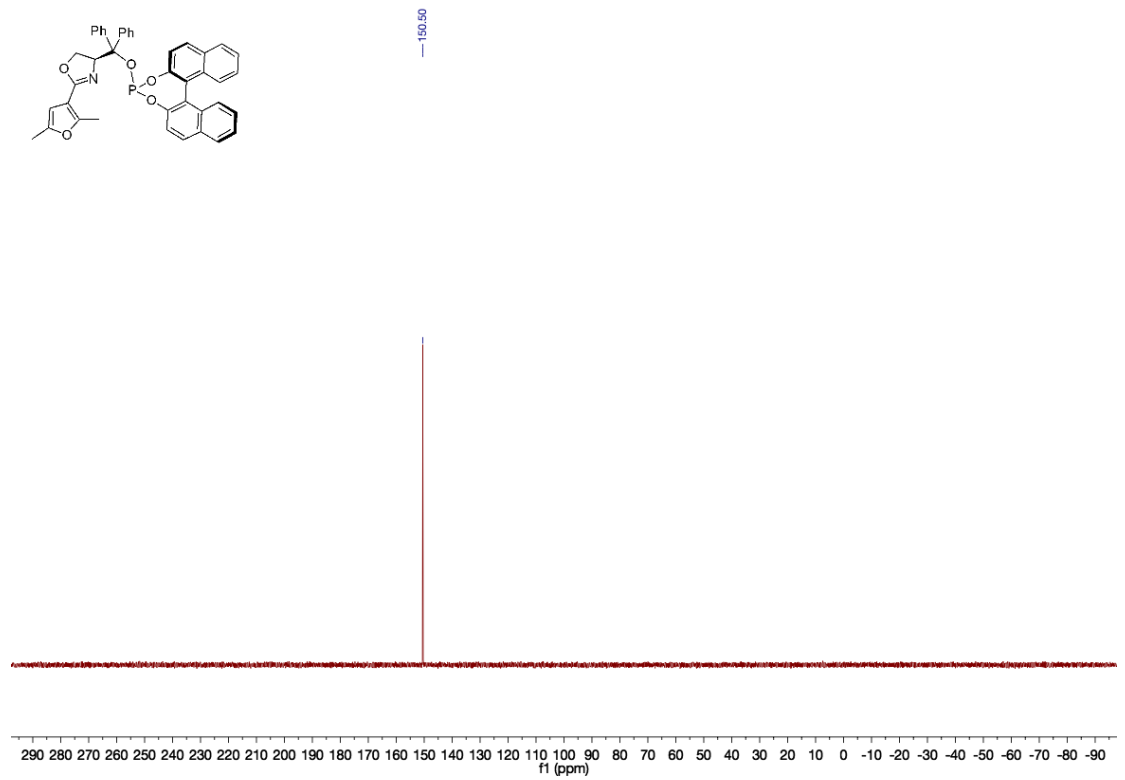

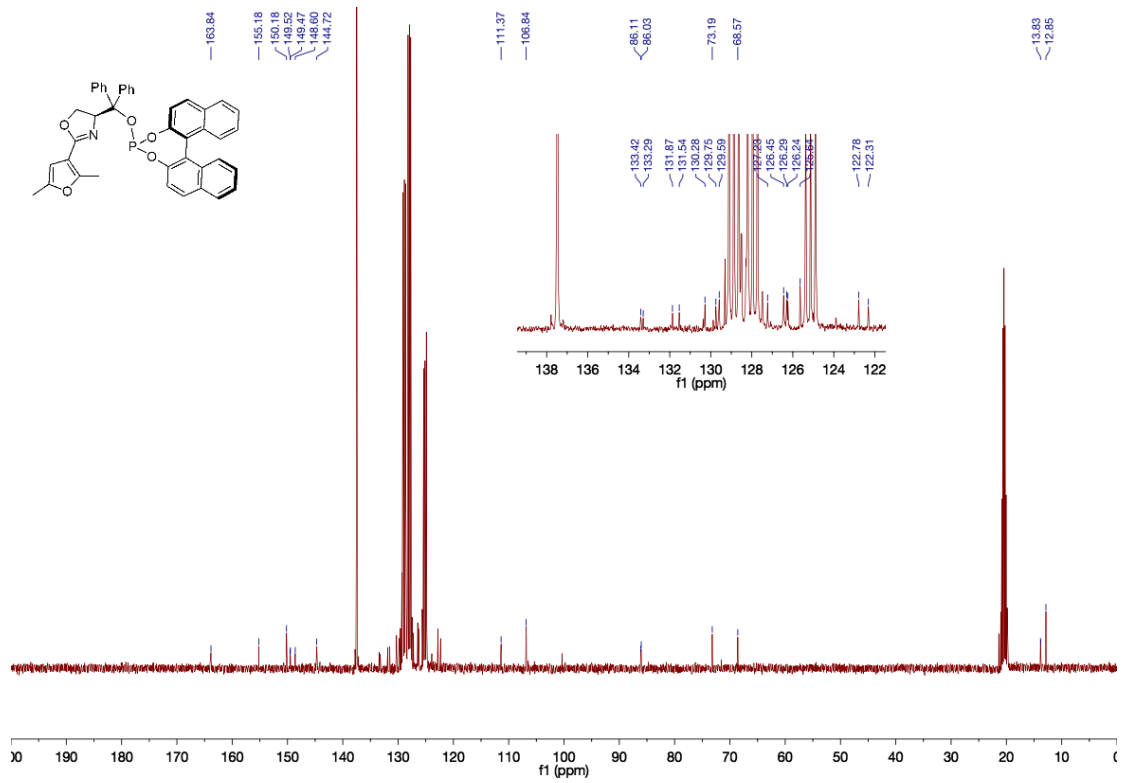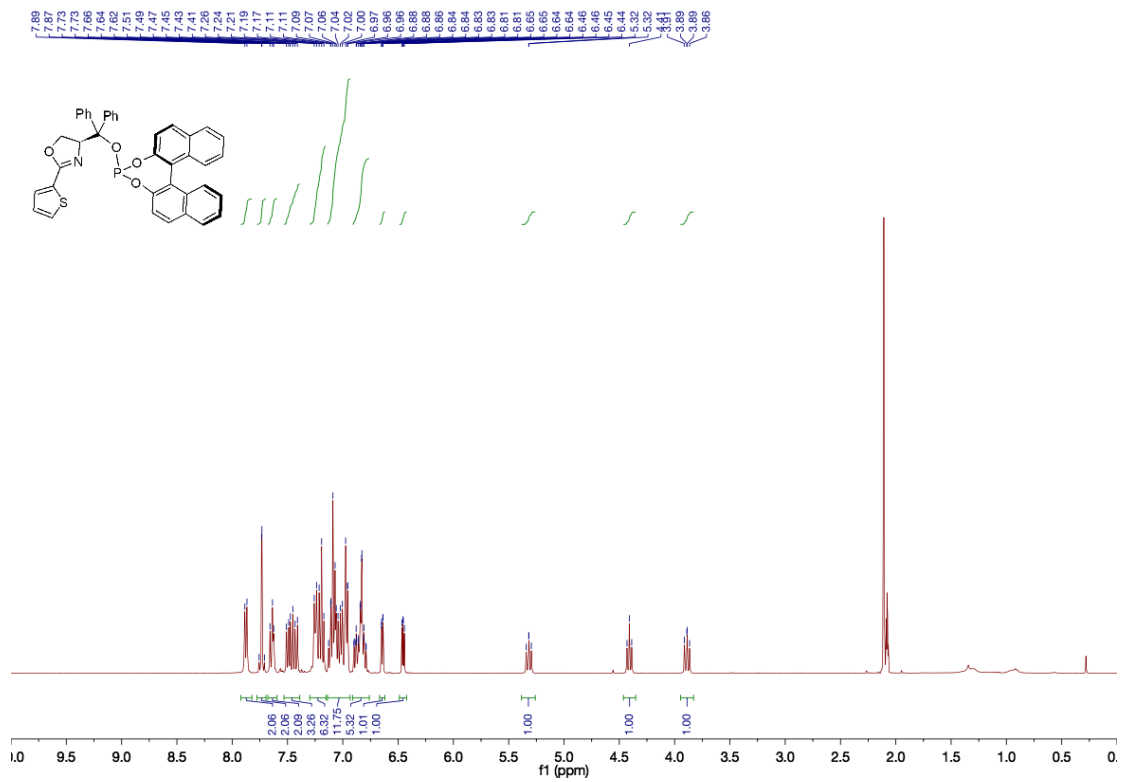

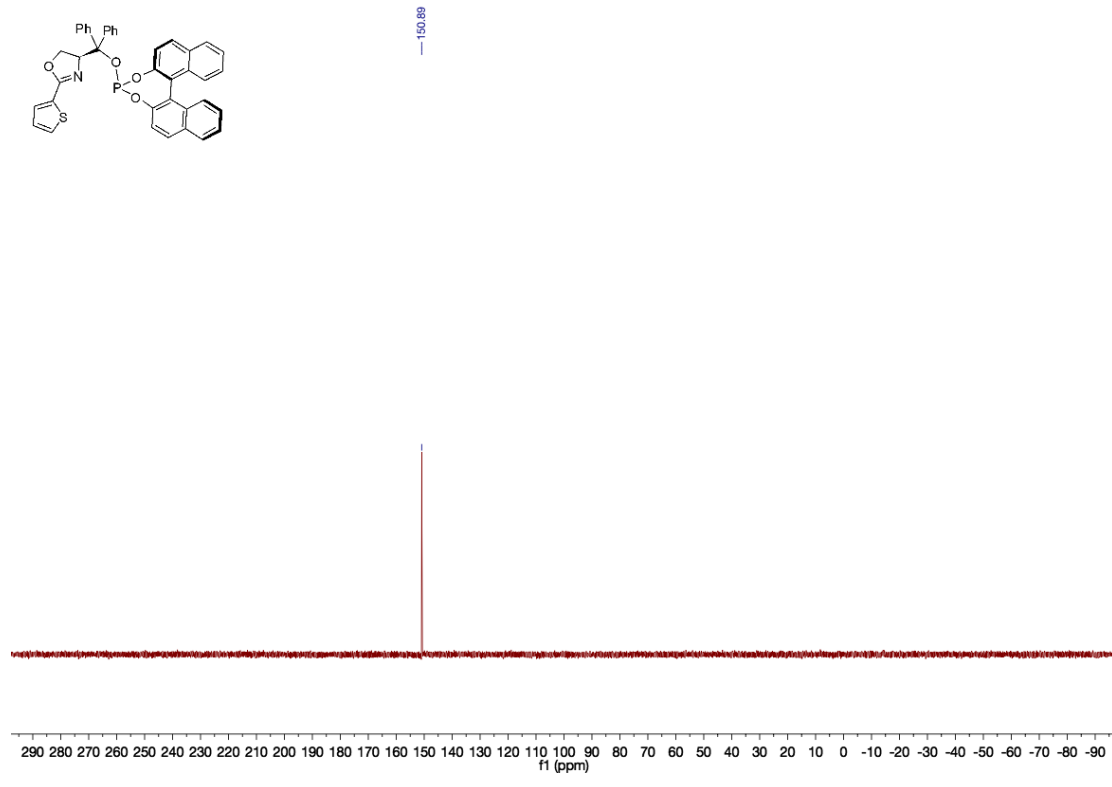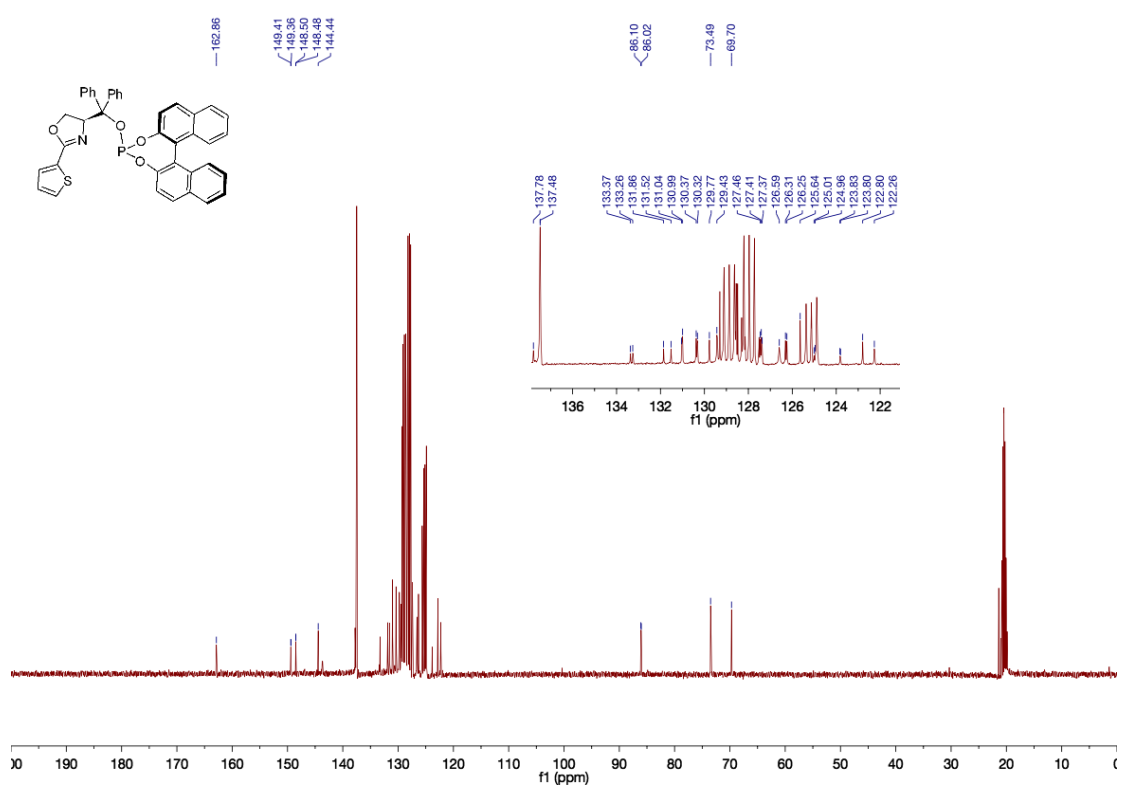

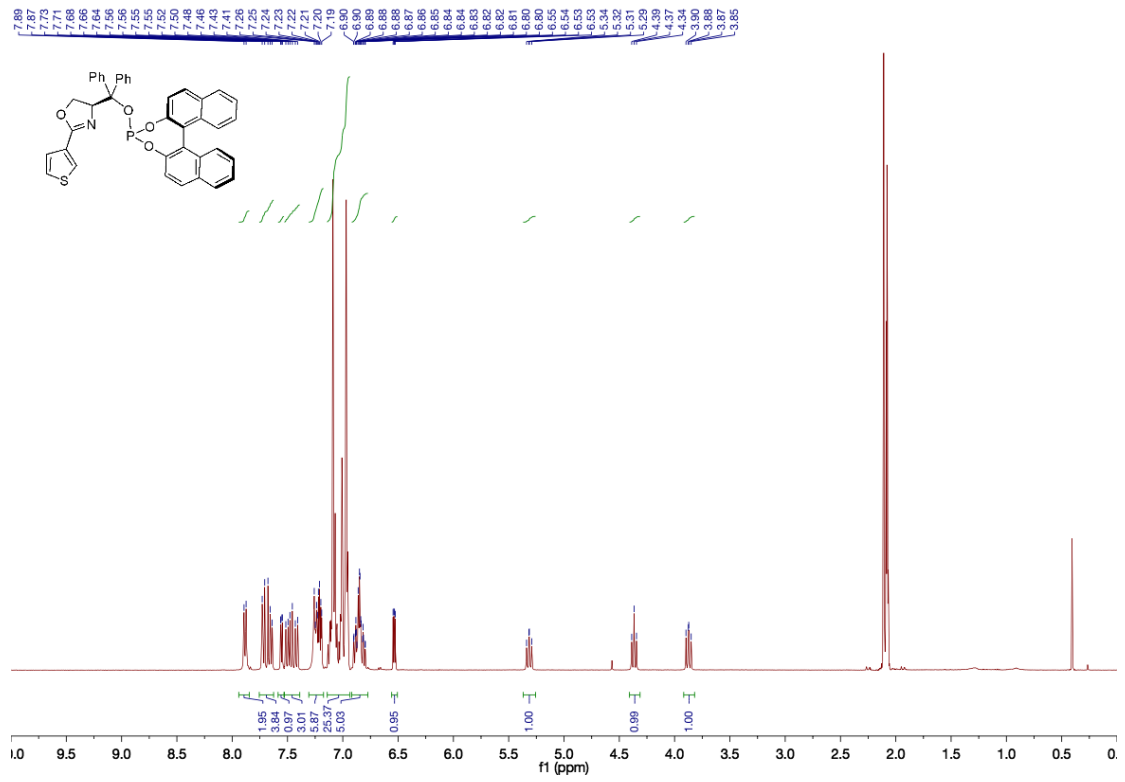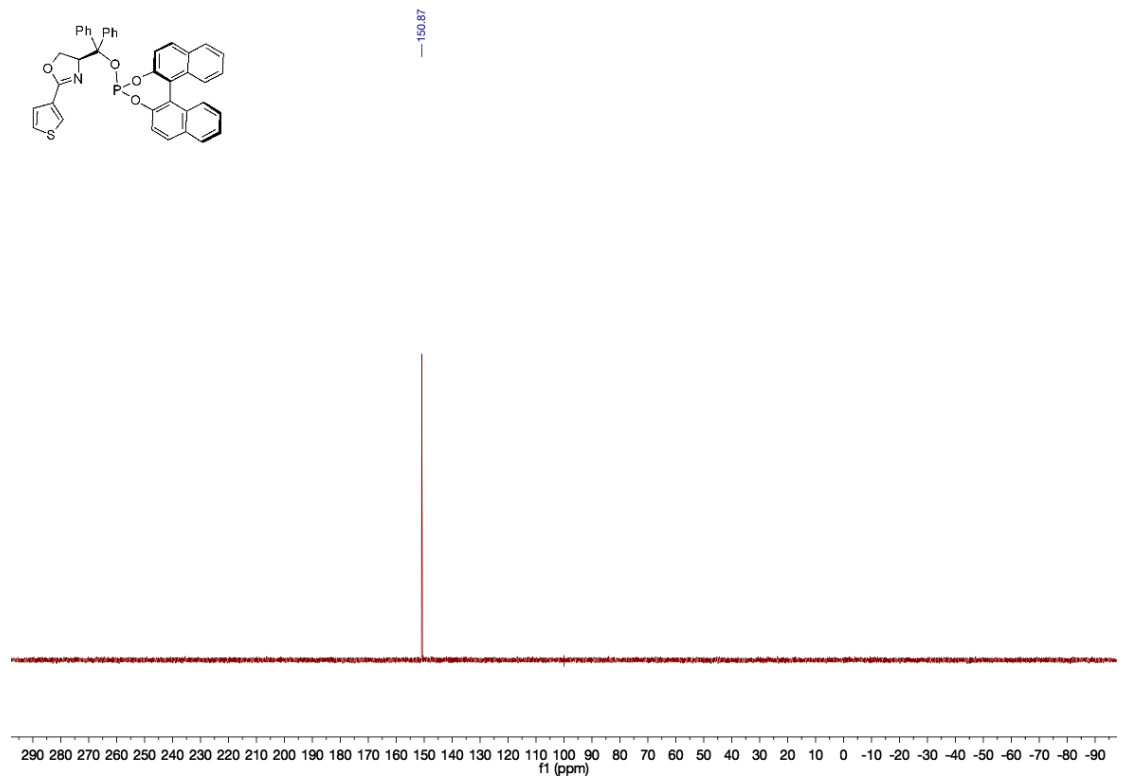

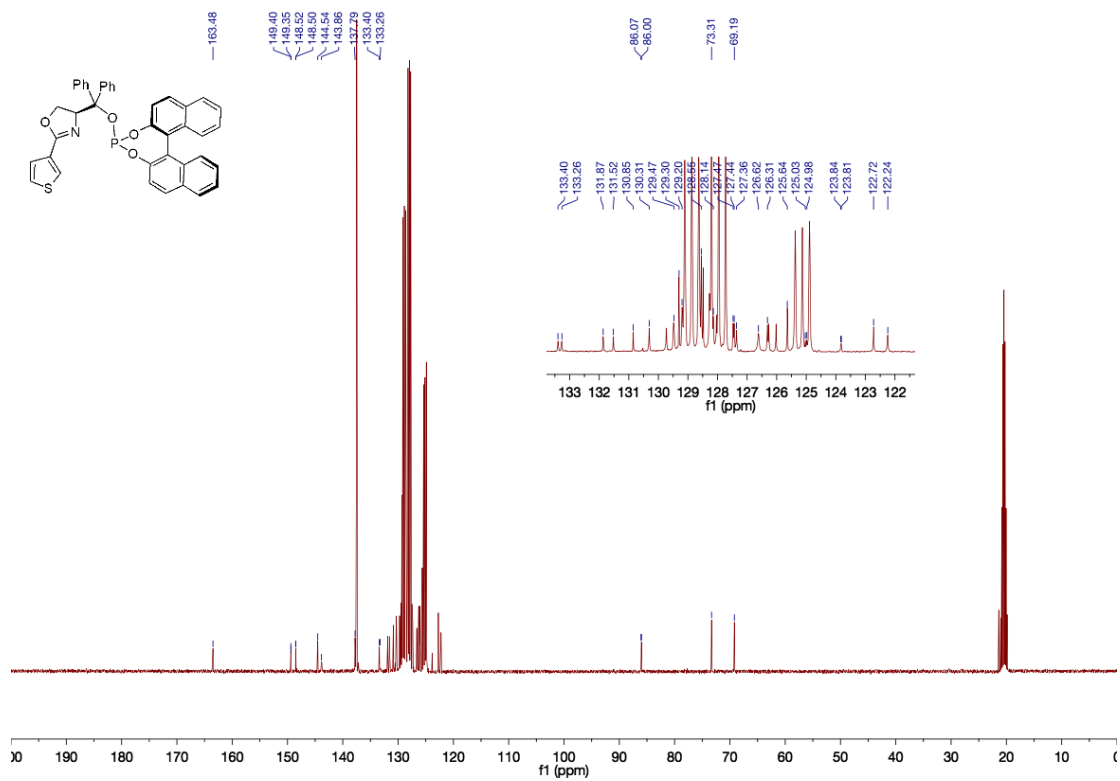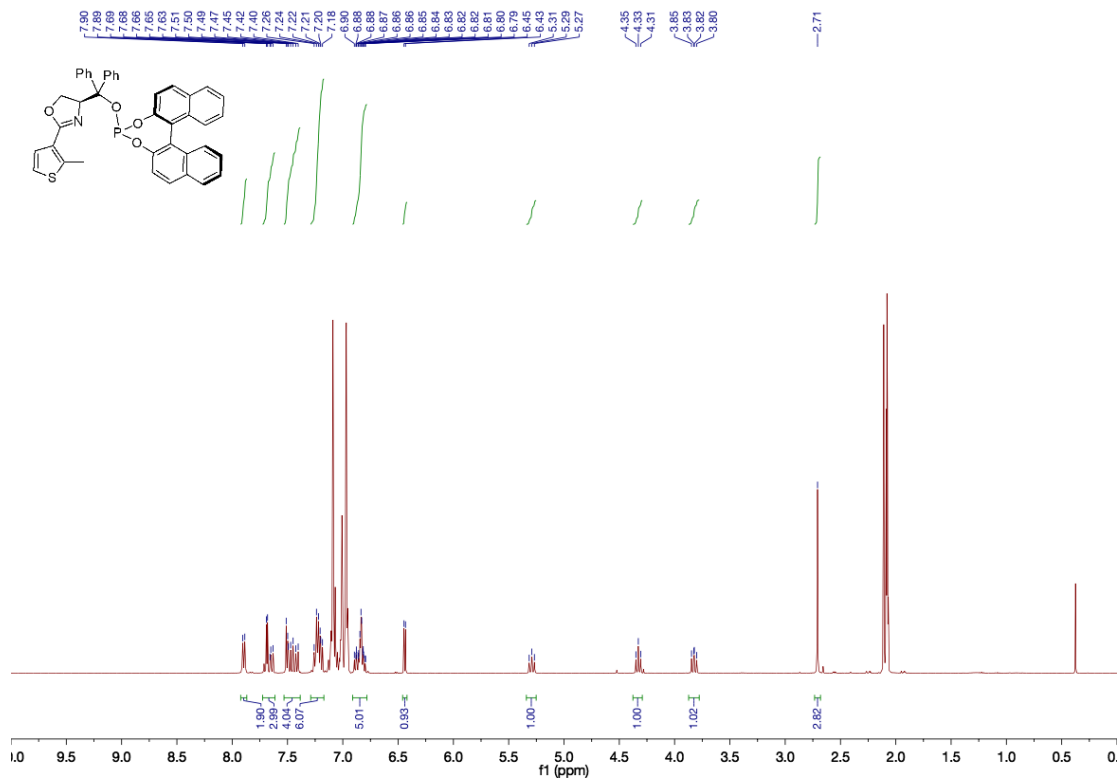

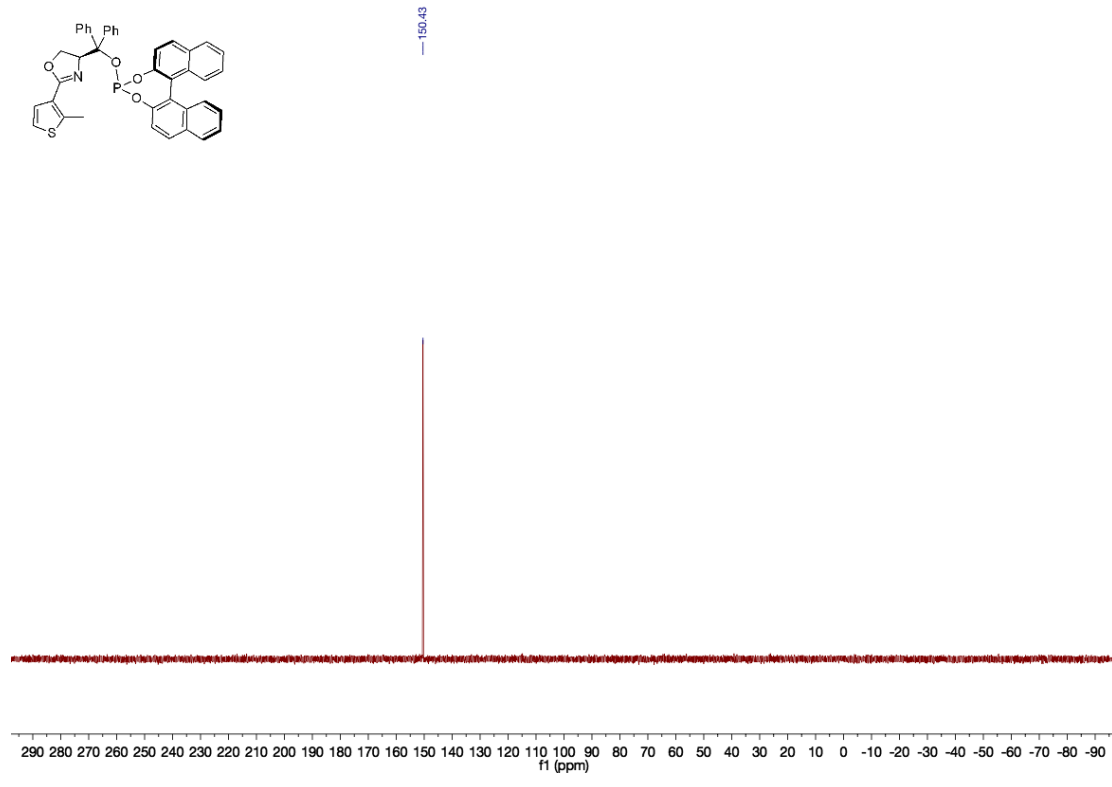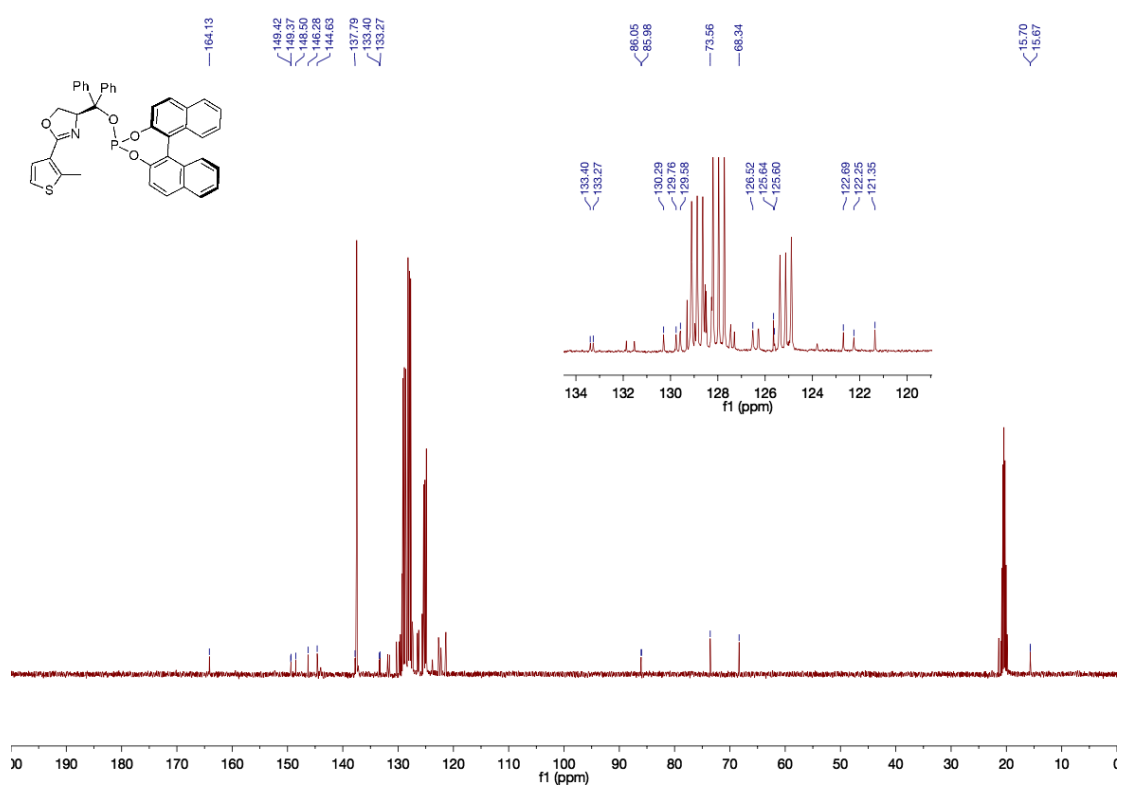

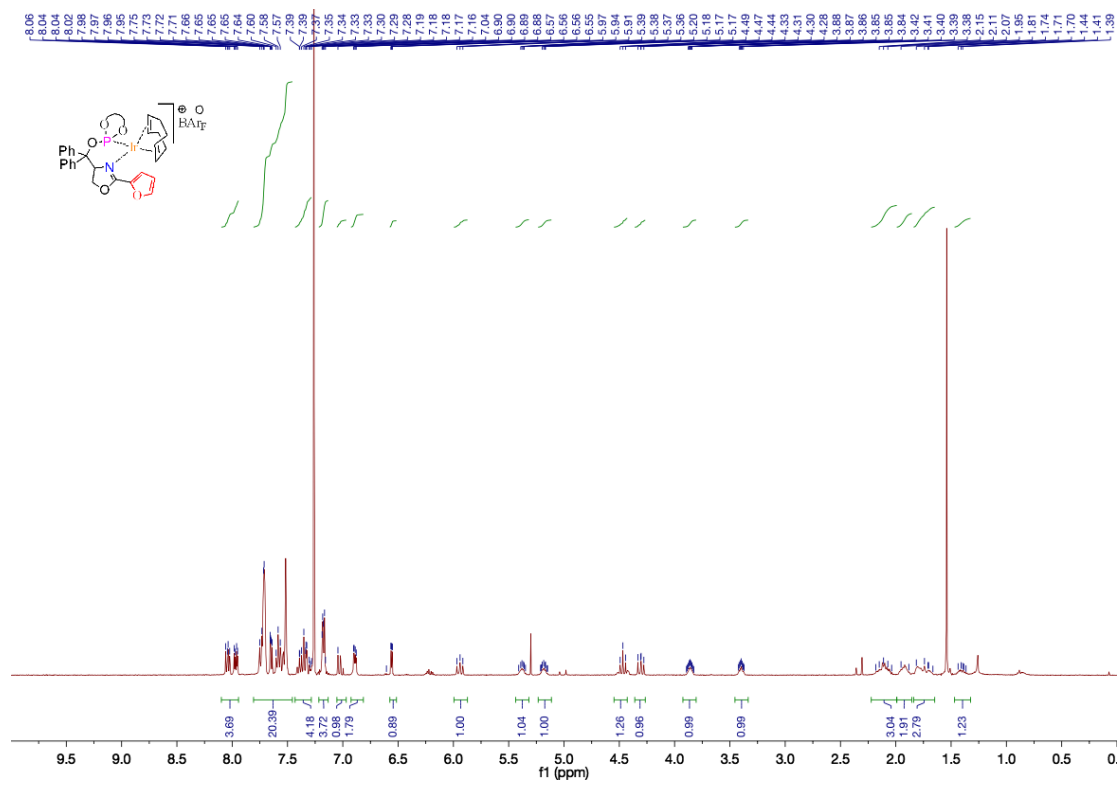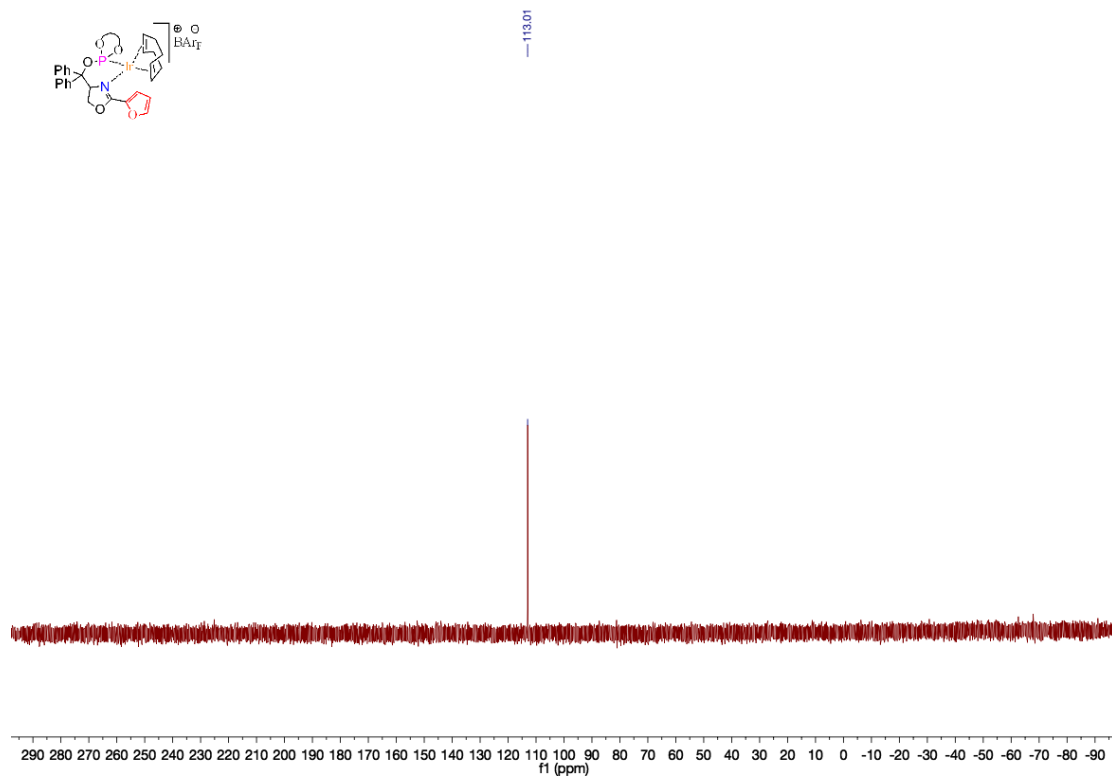



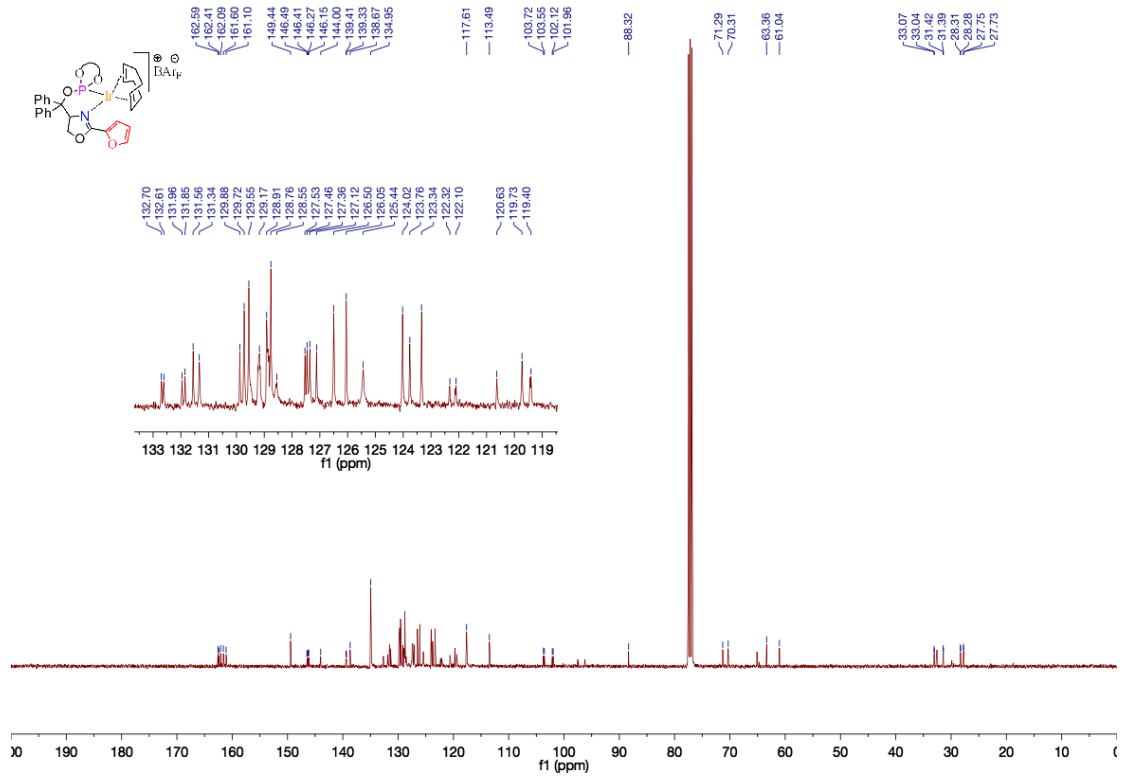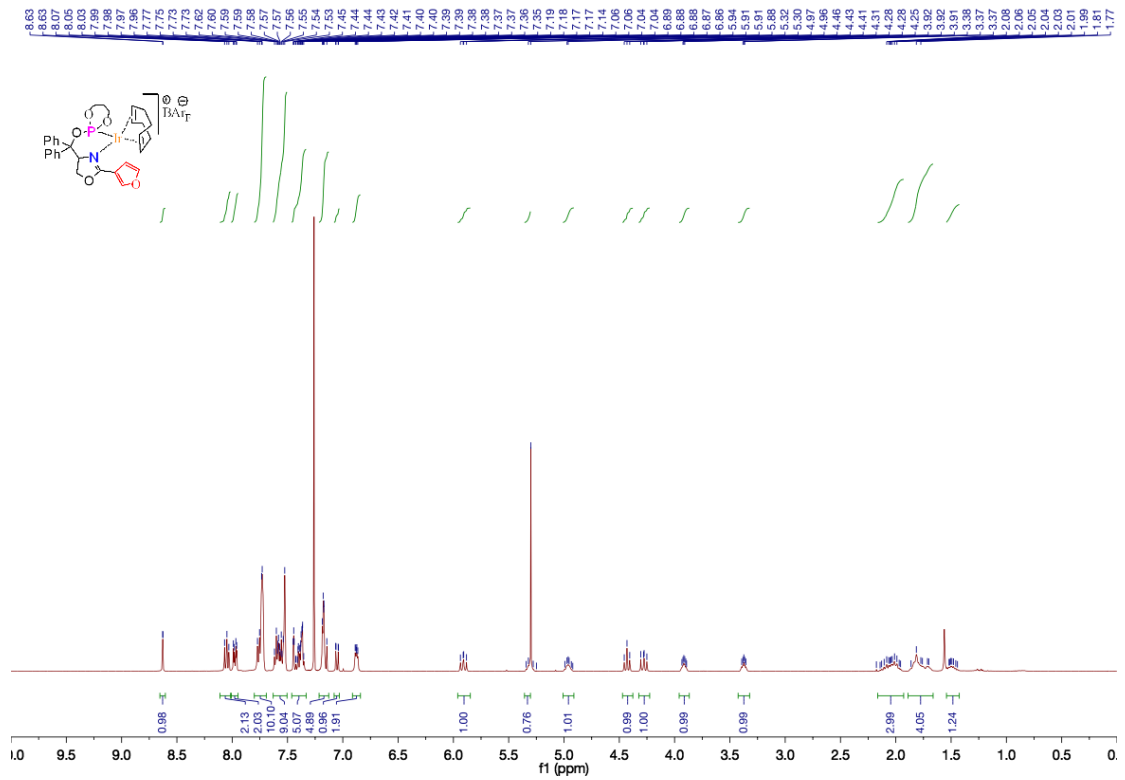

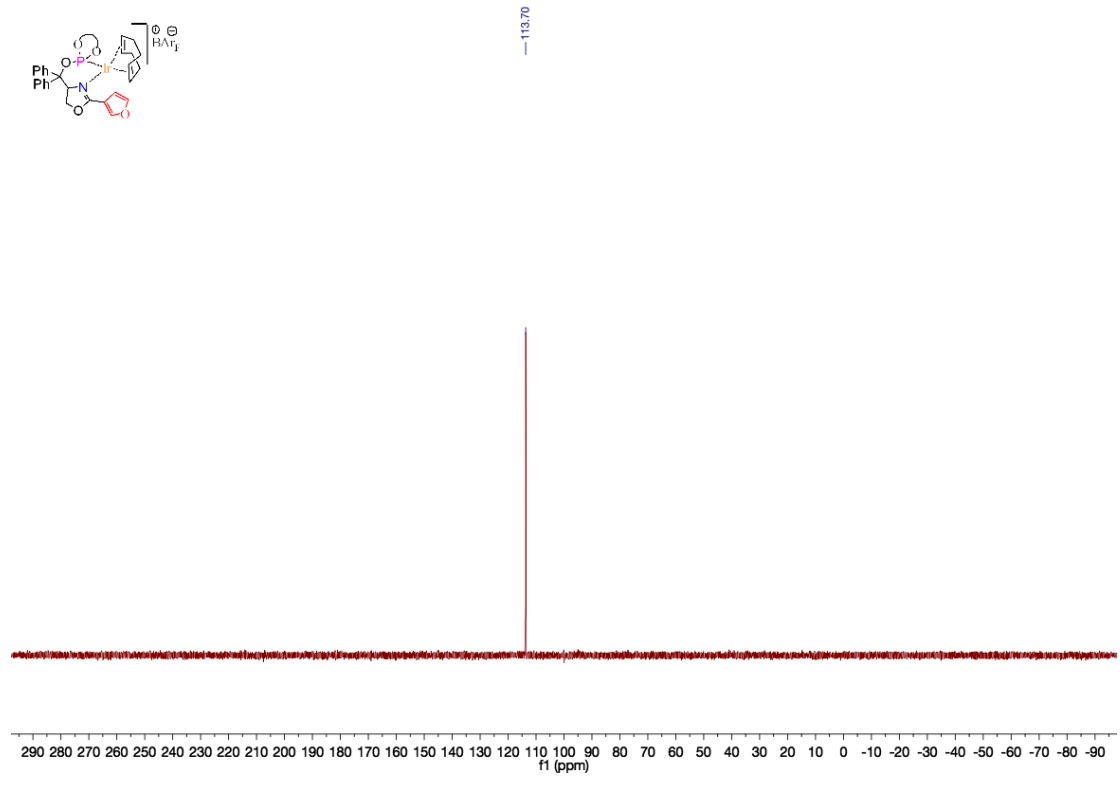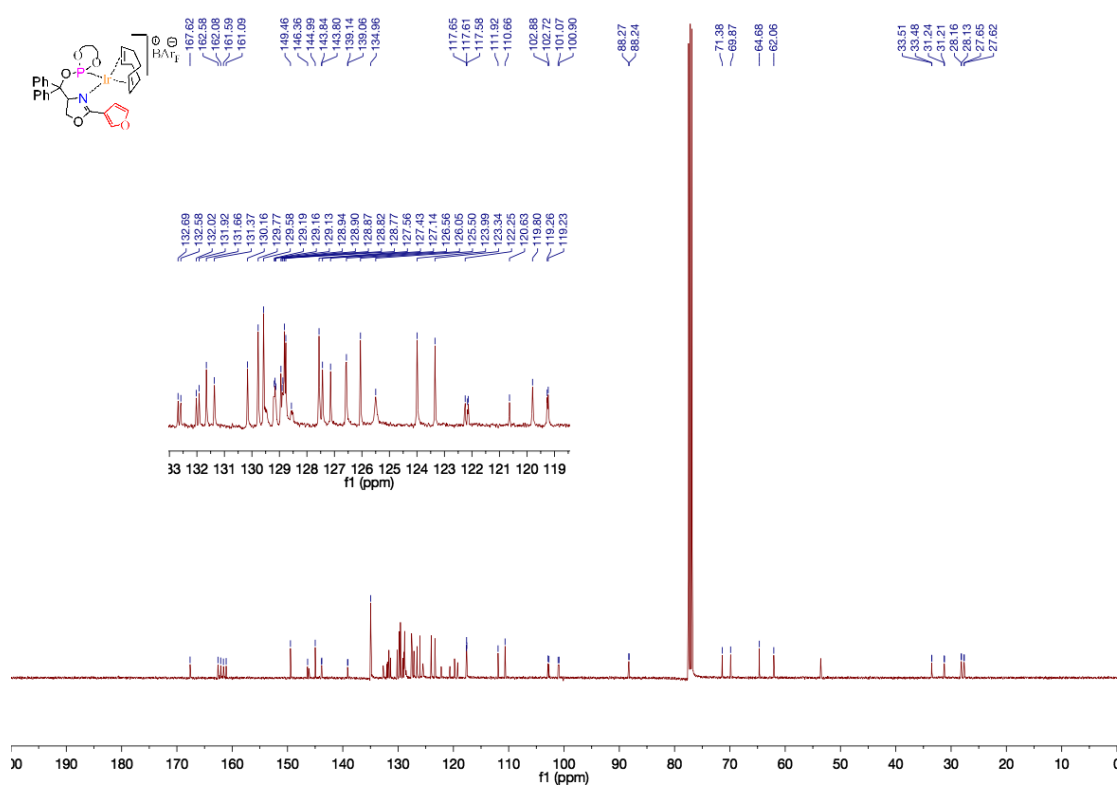

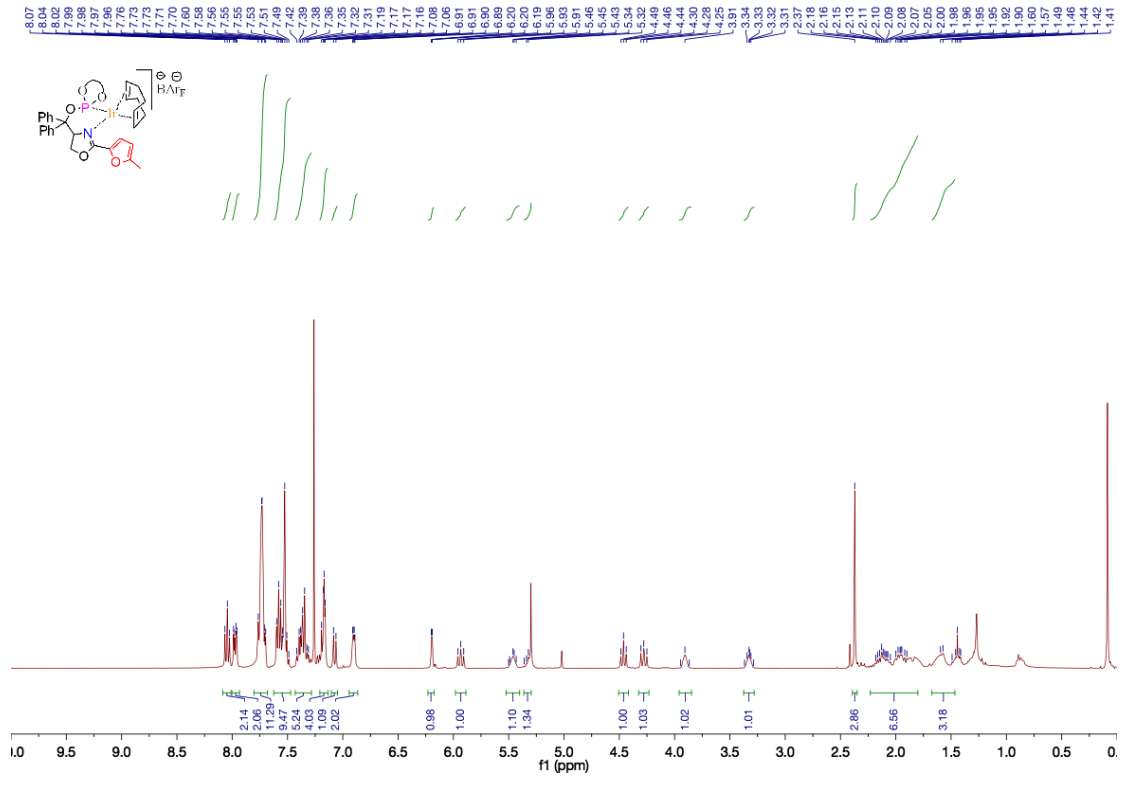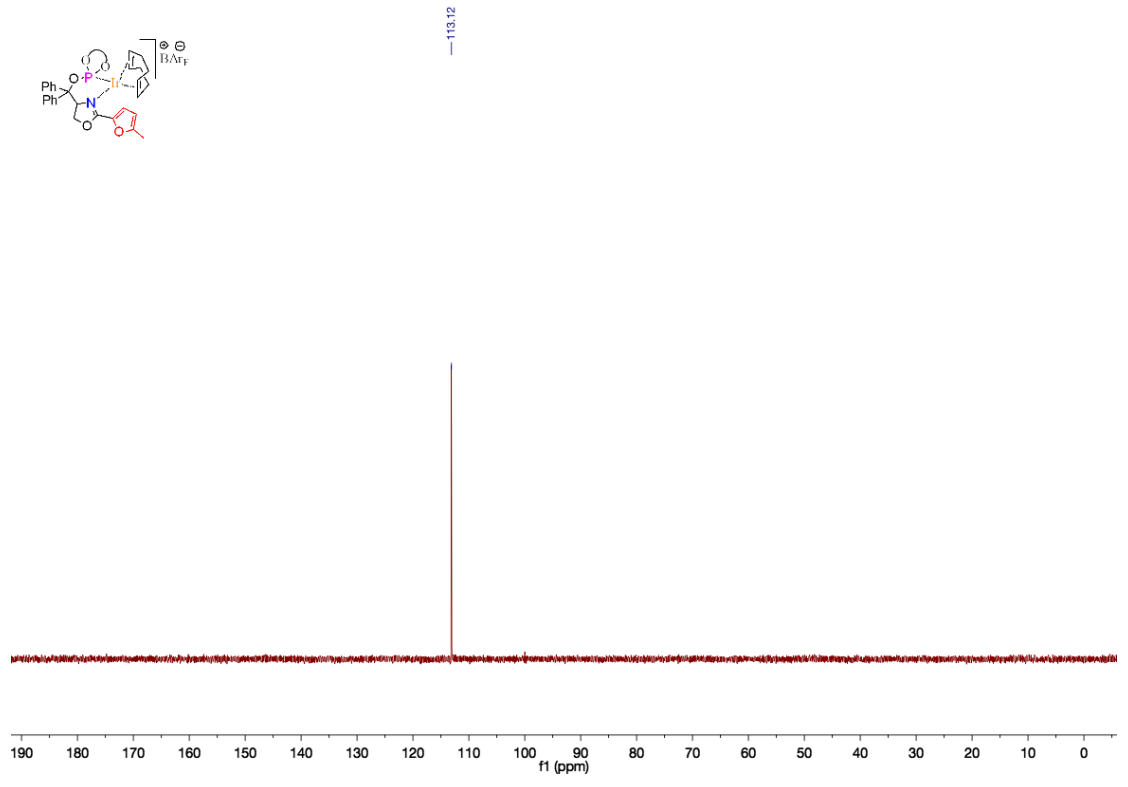

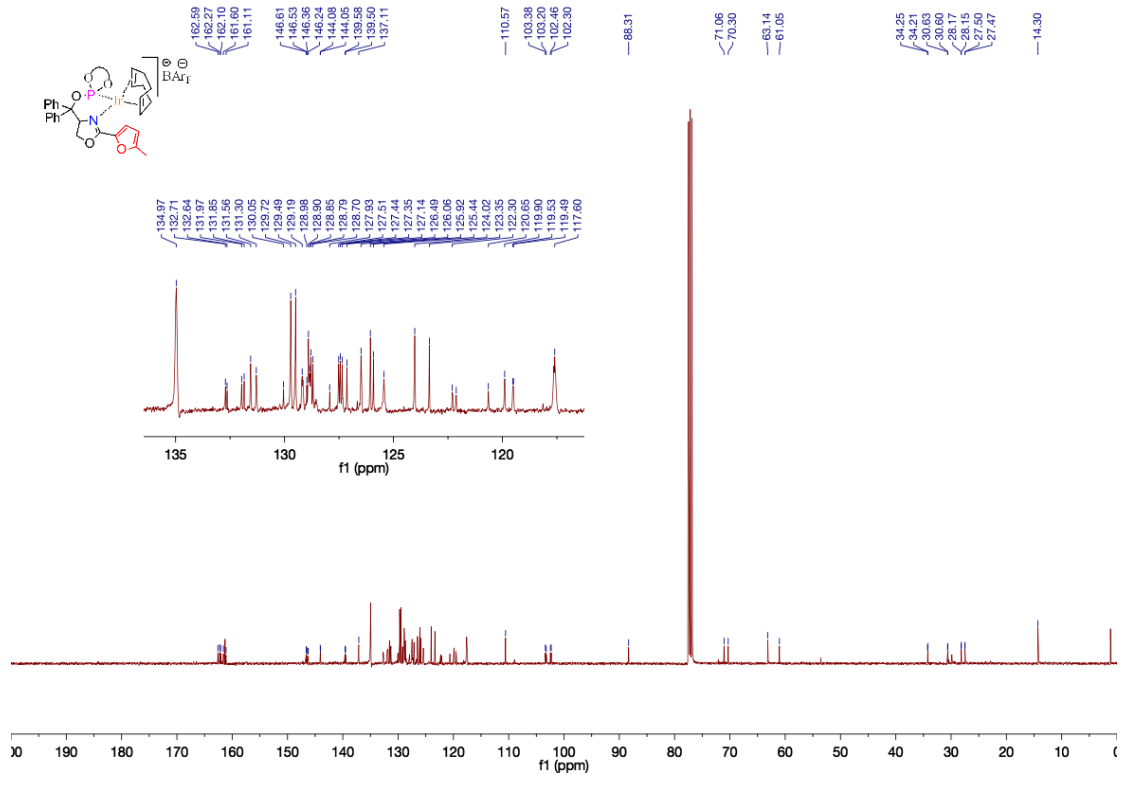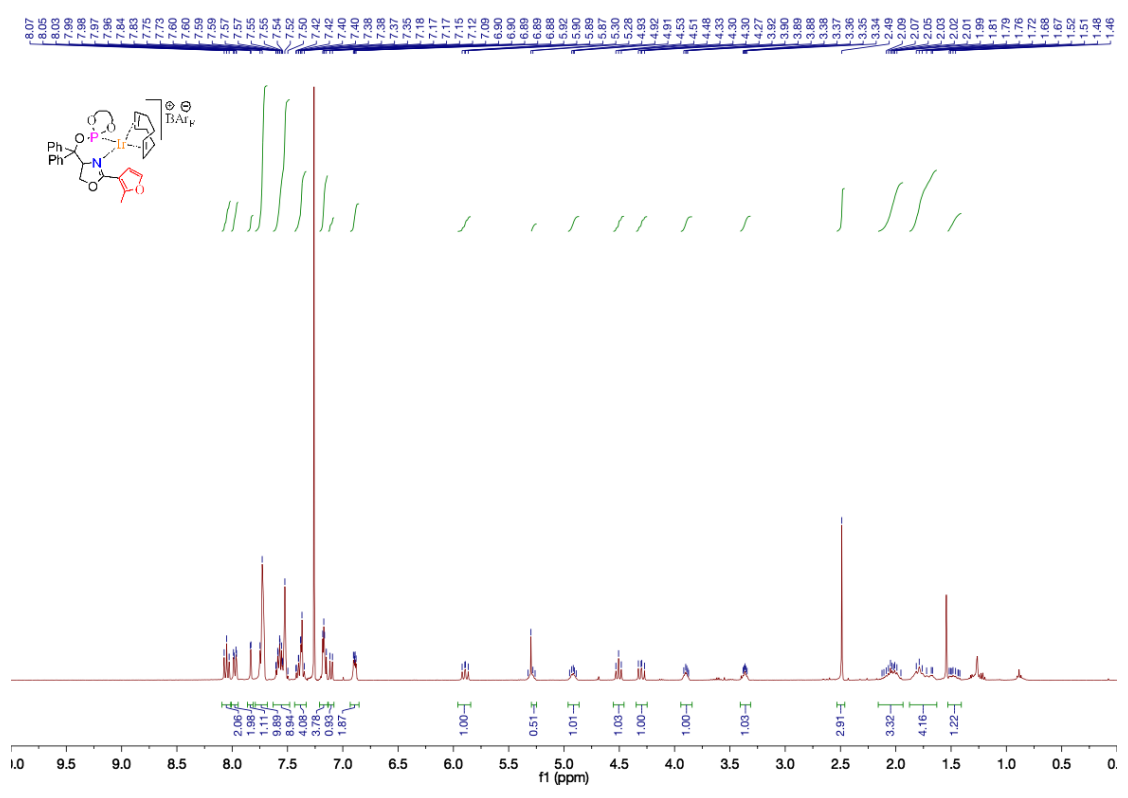

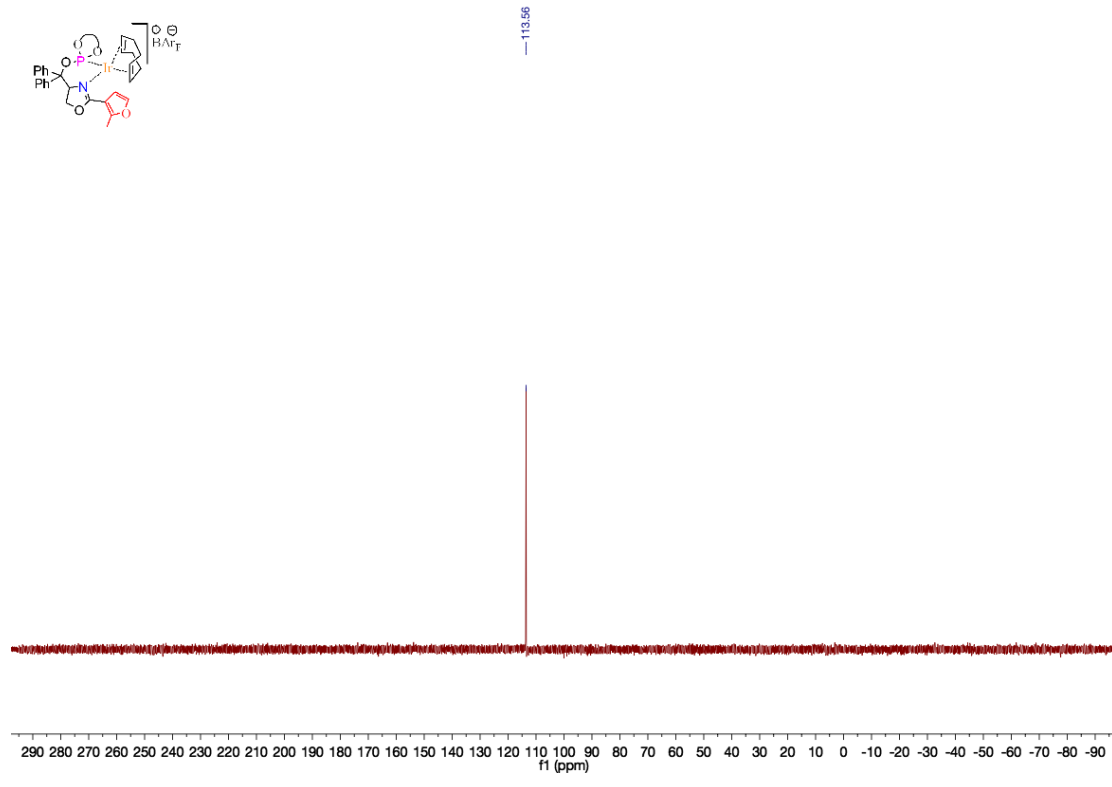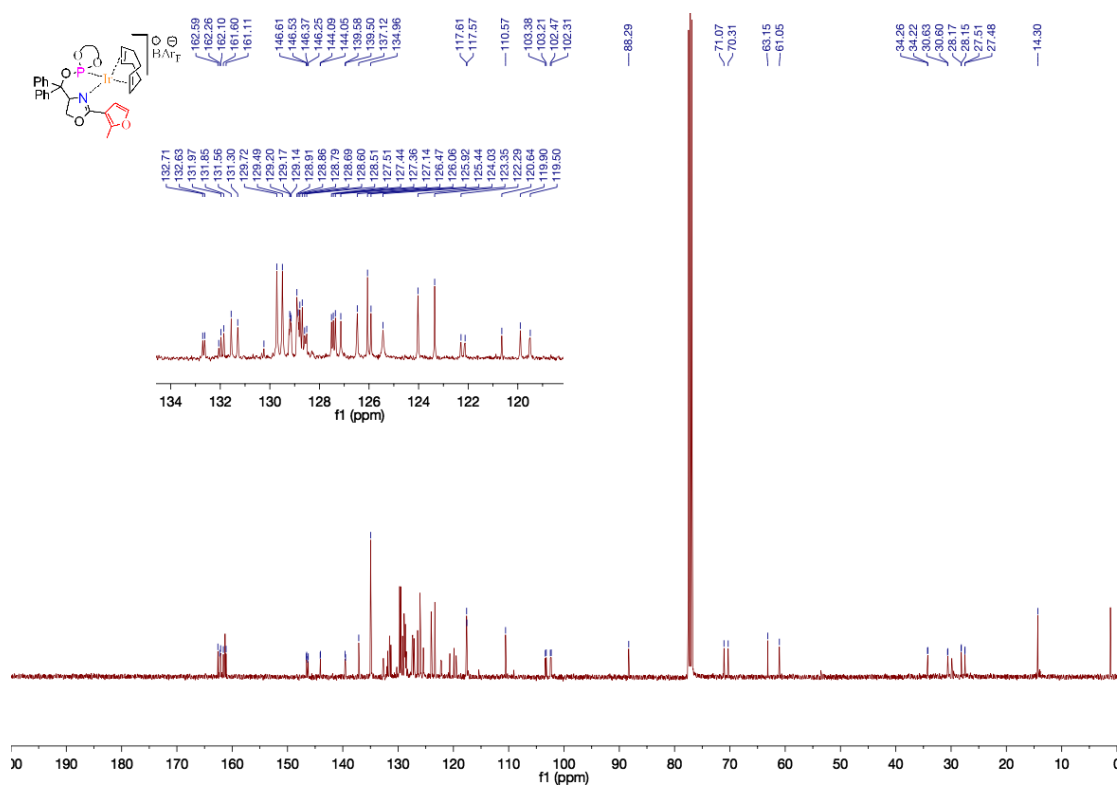

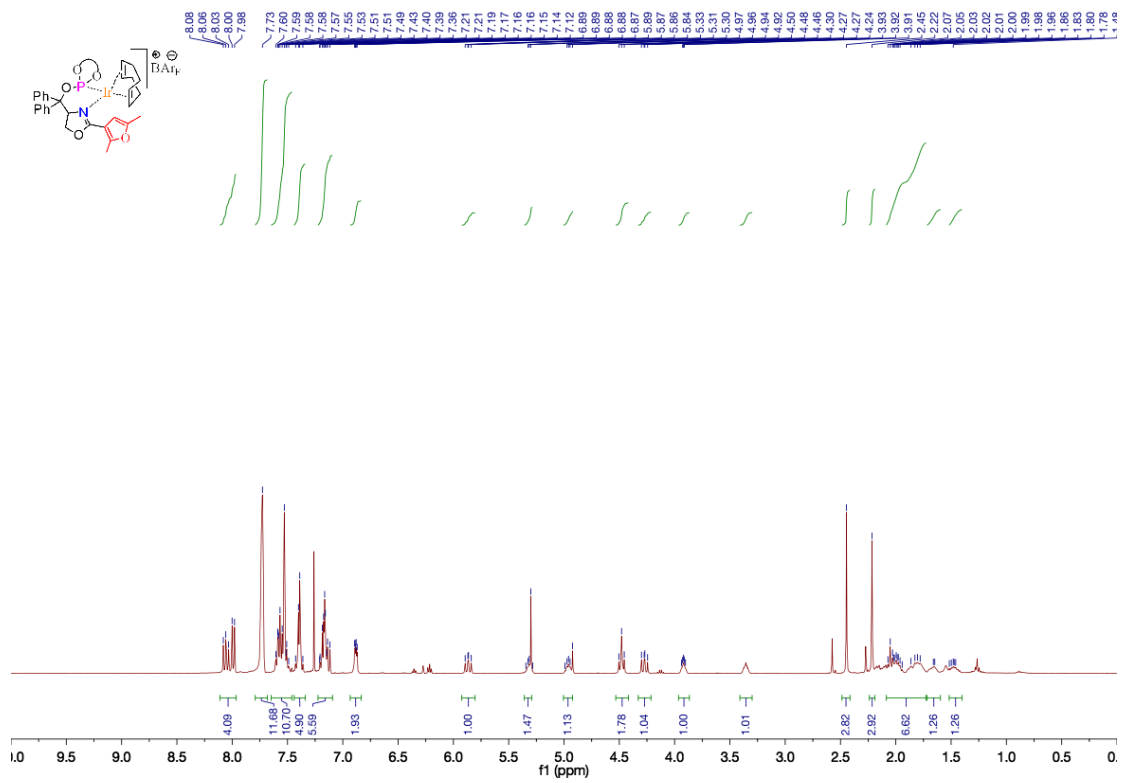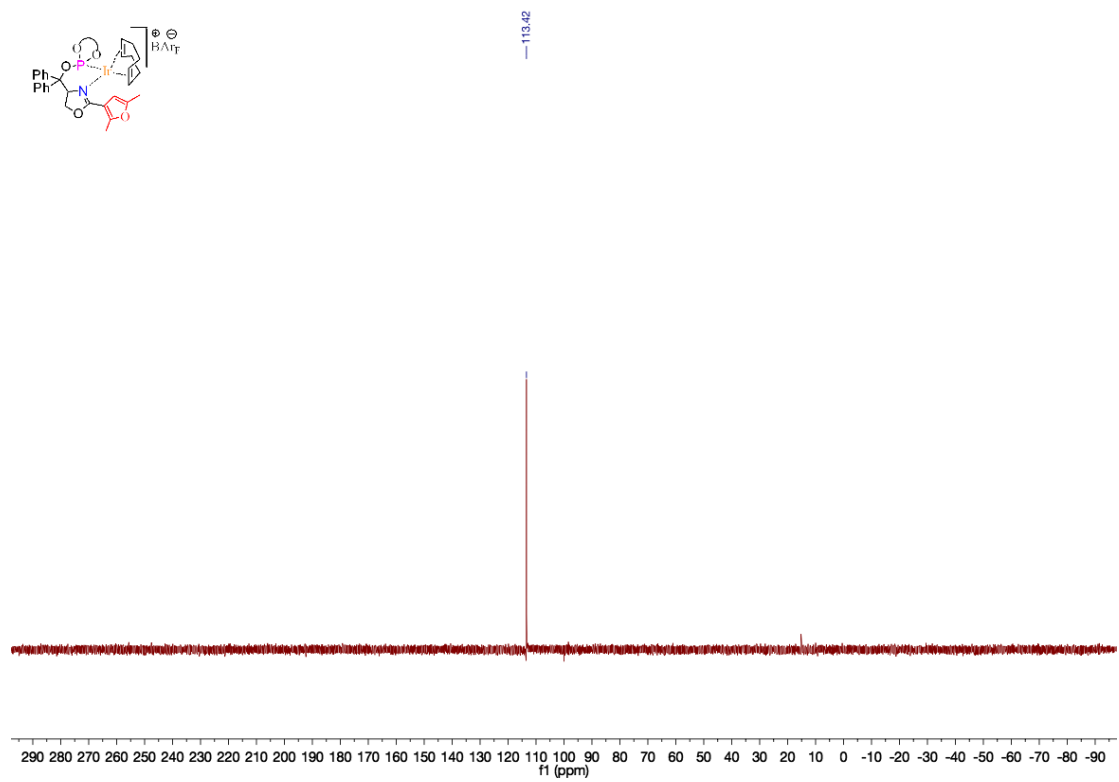

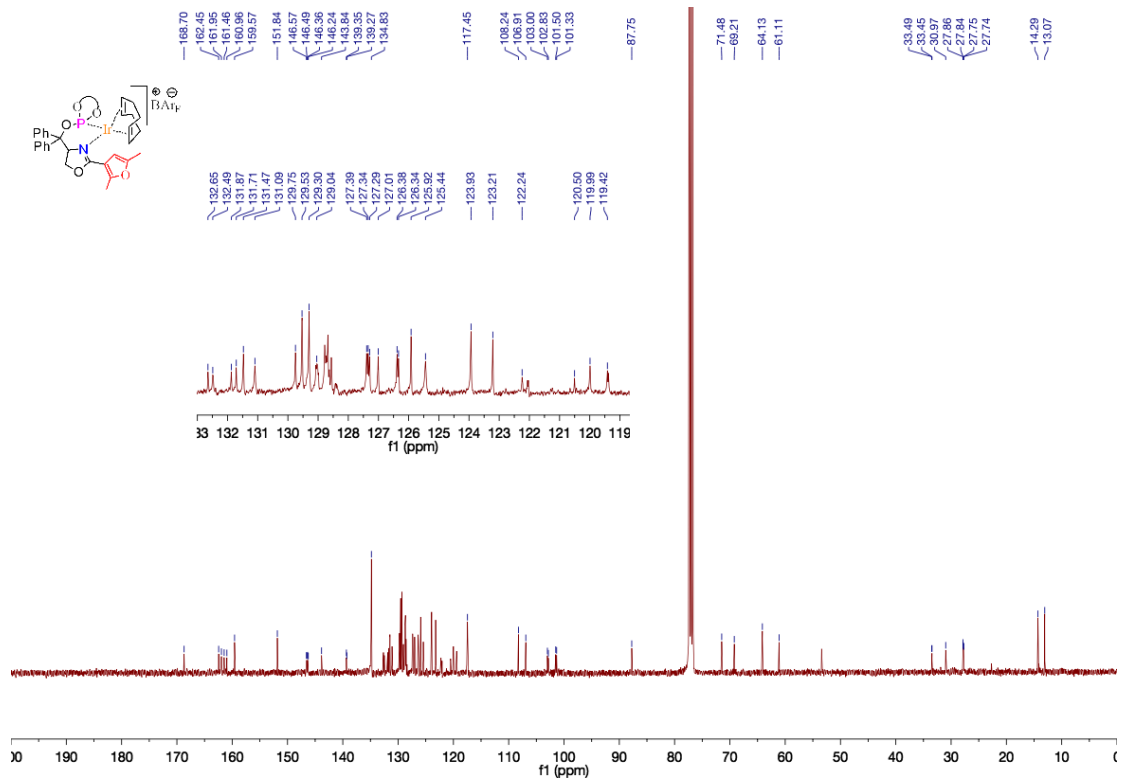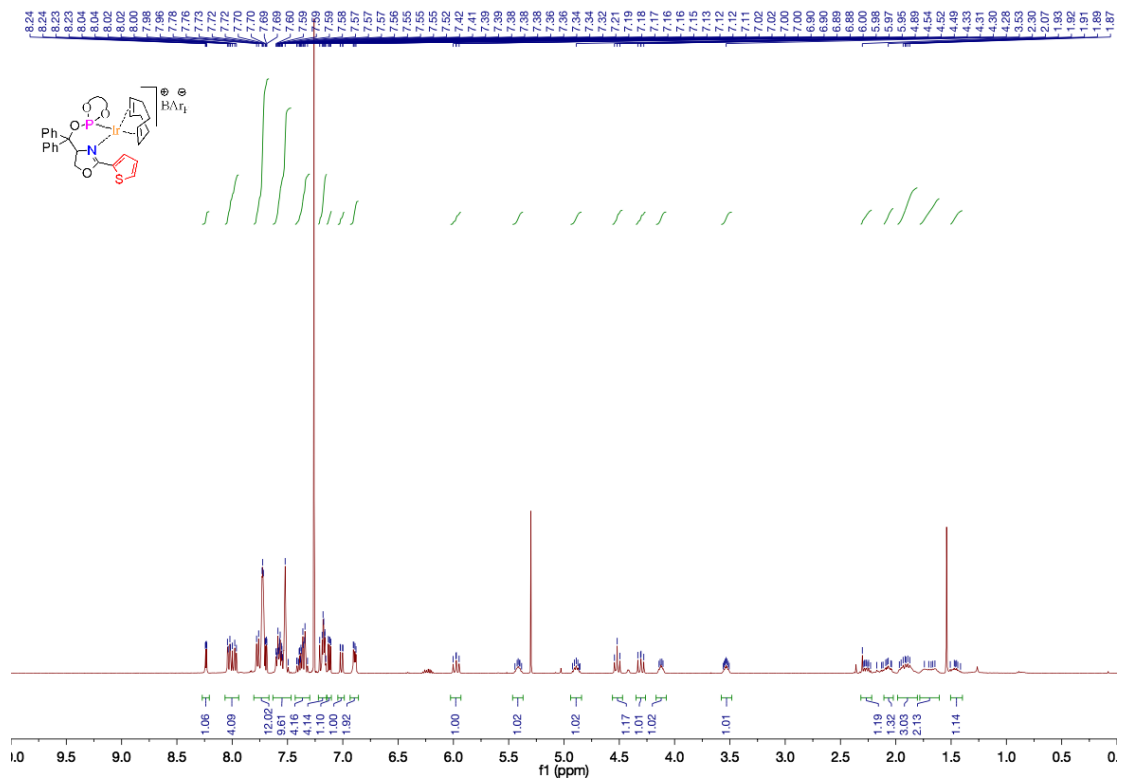

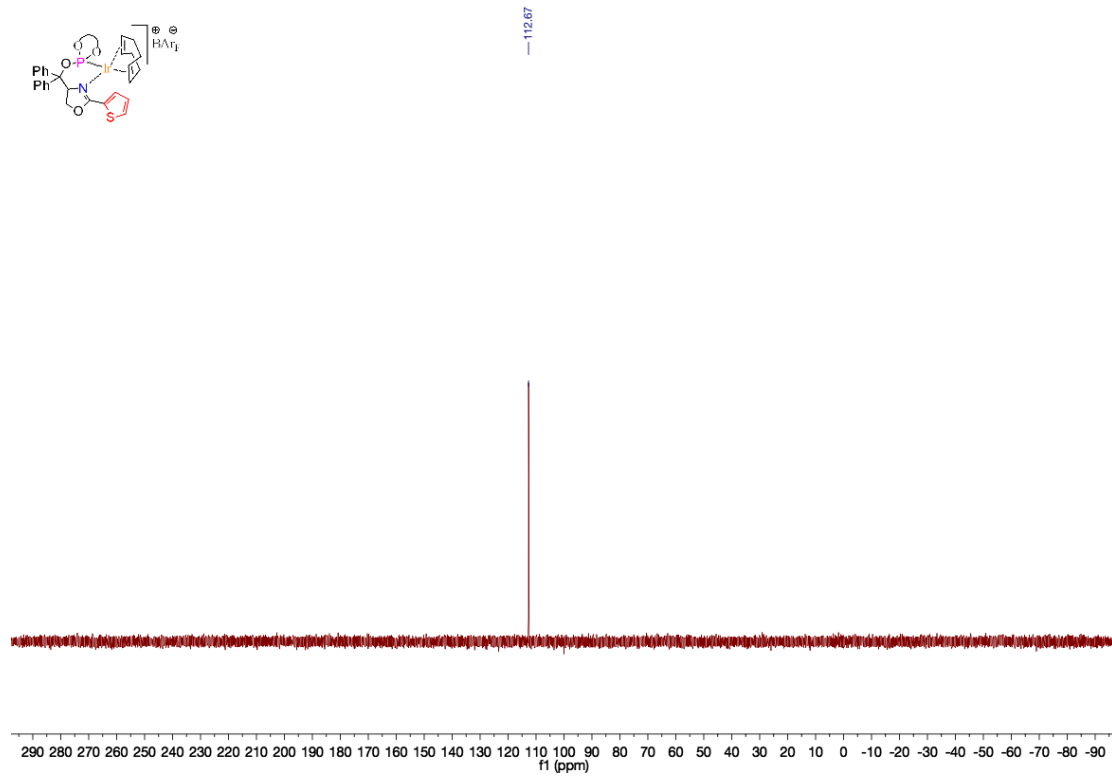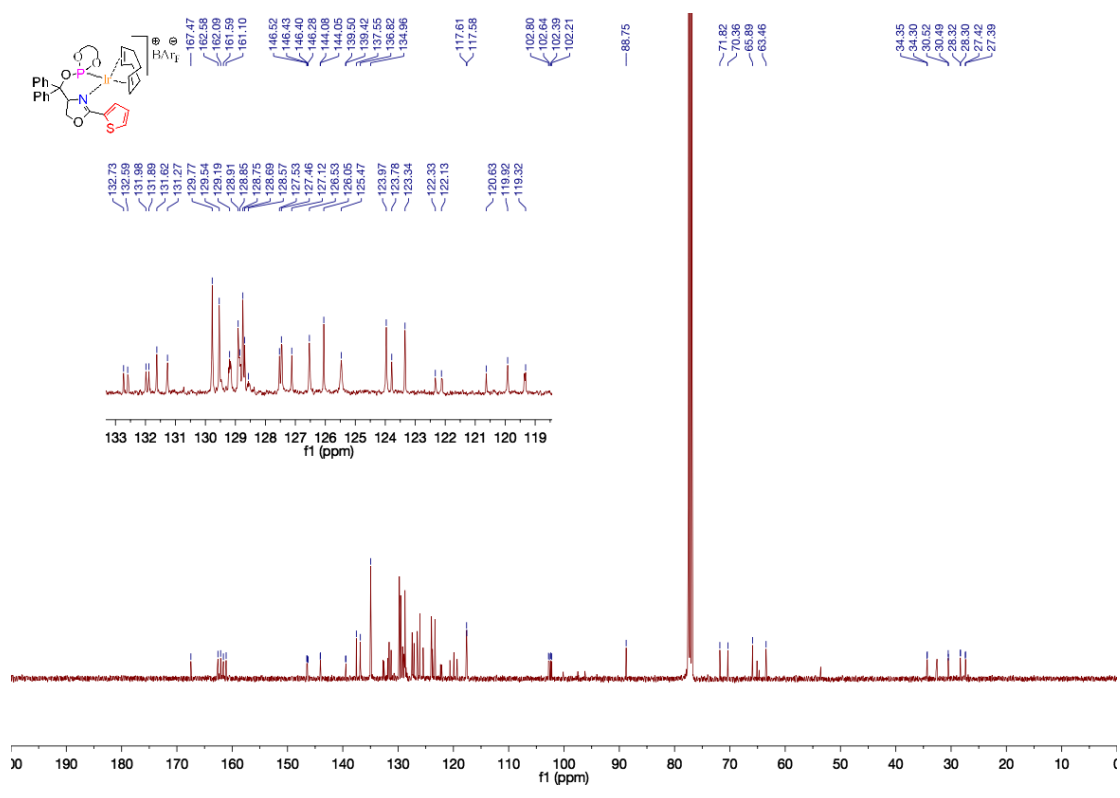



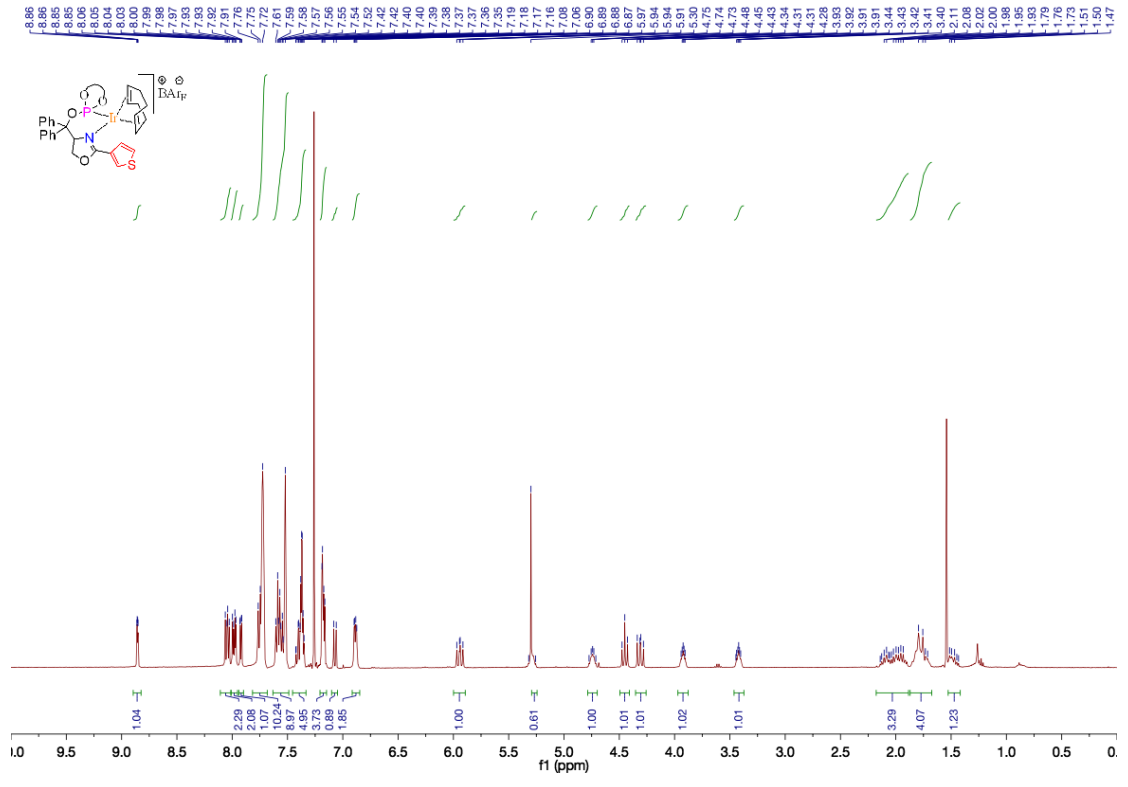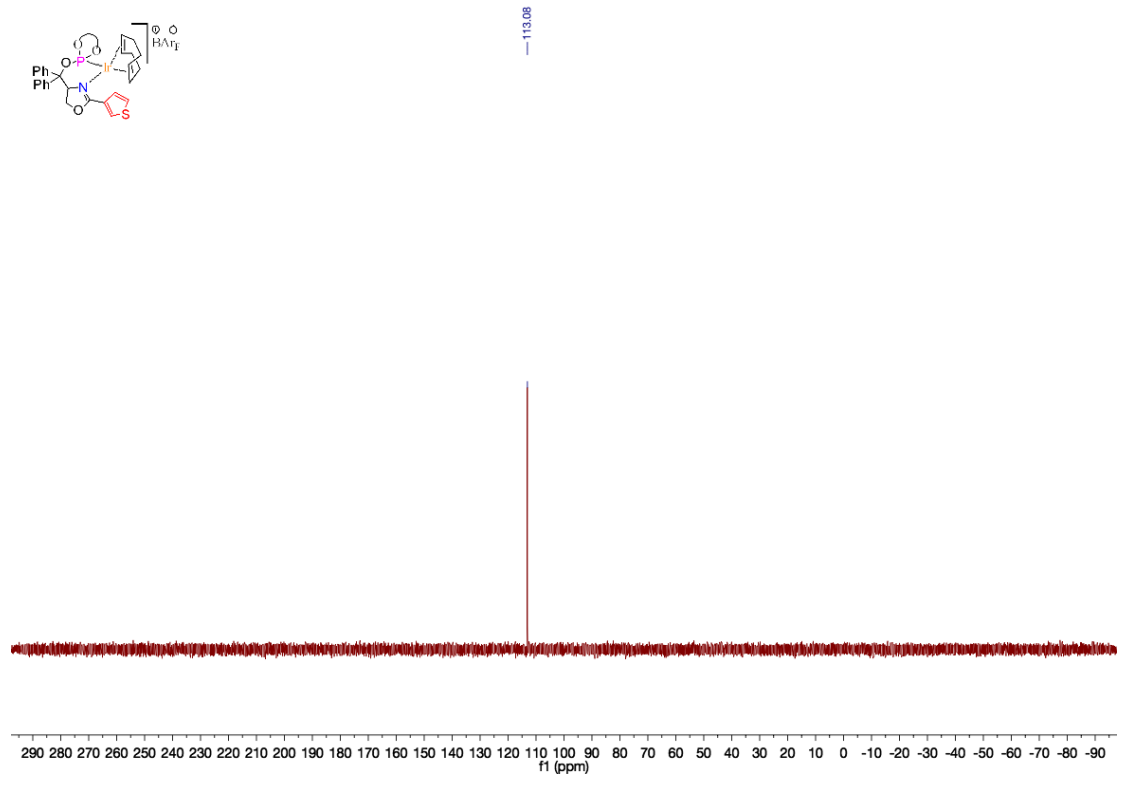

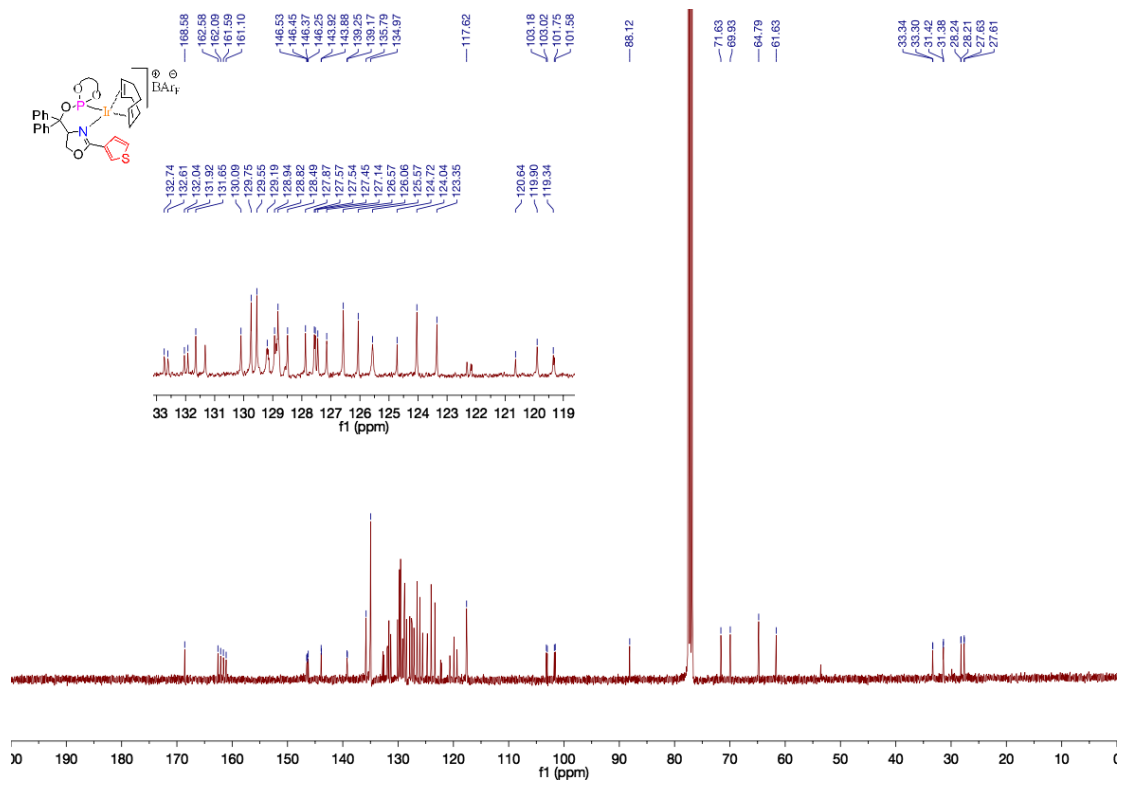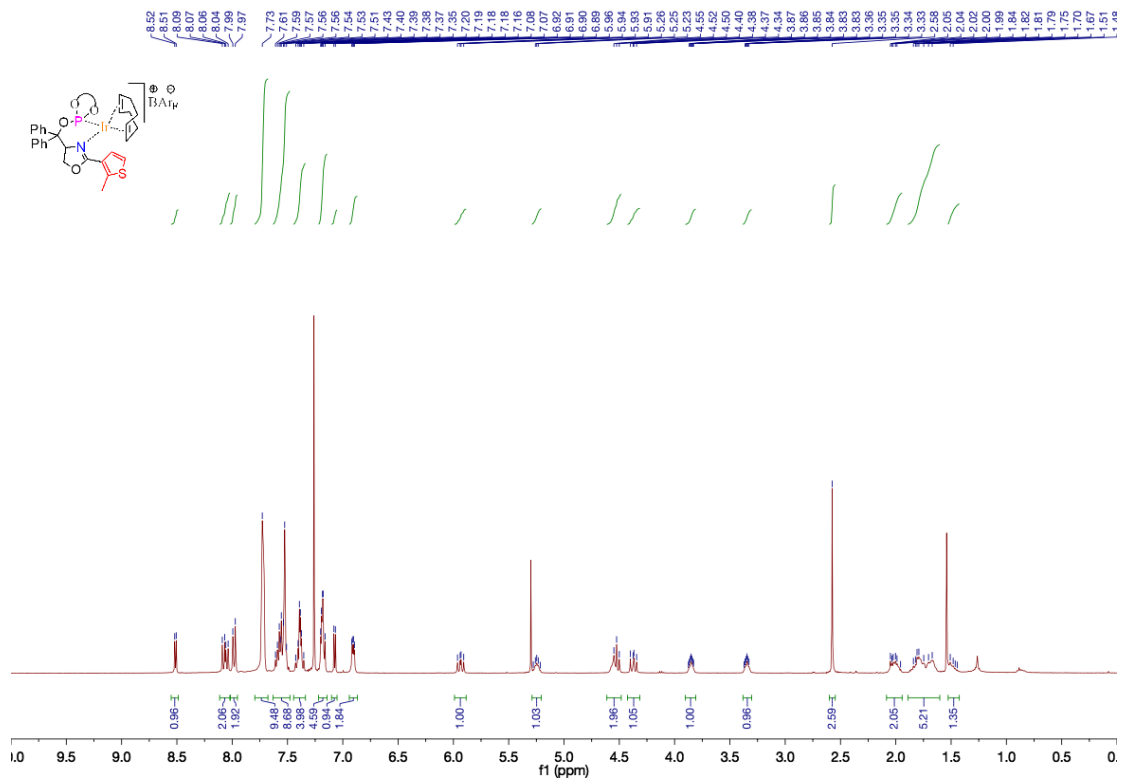

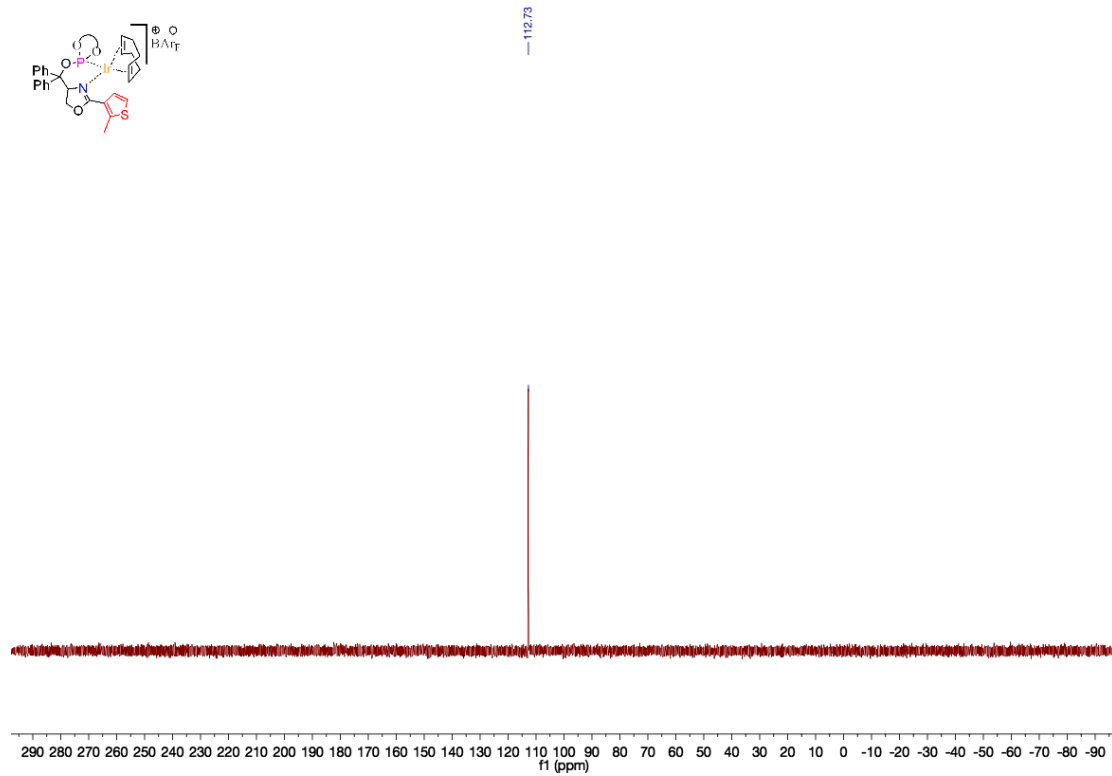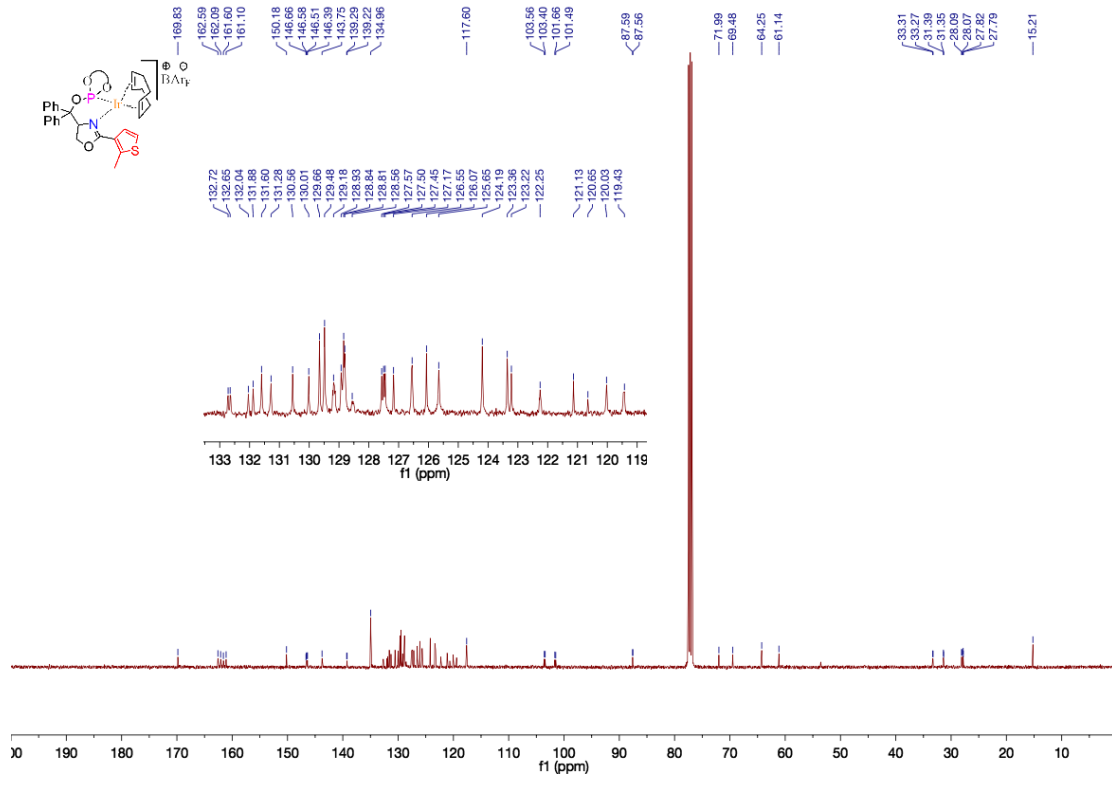

SK-180218-10-71.10.fid

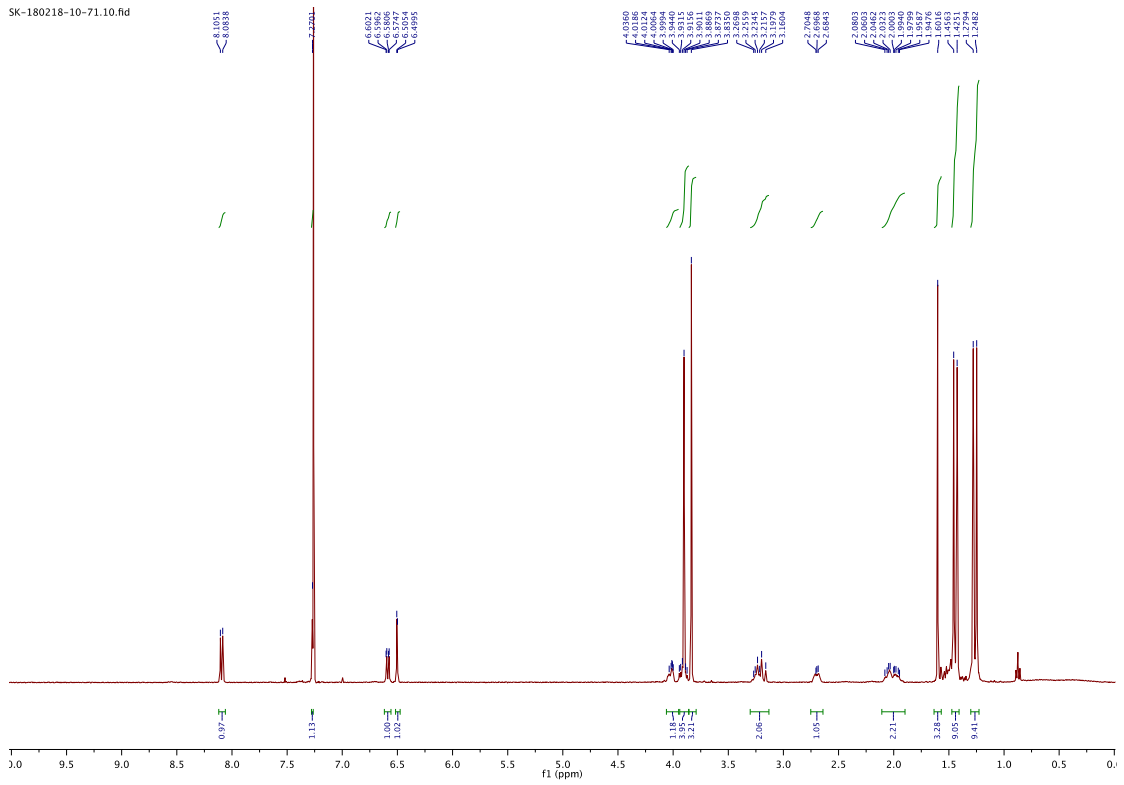

SK-180218-10-71.21.fid

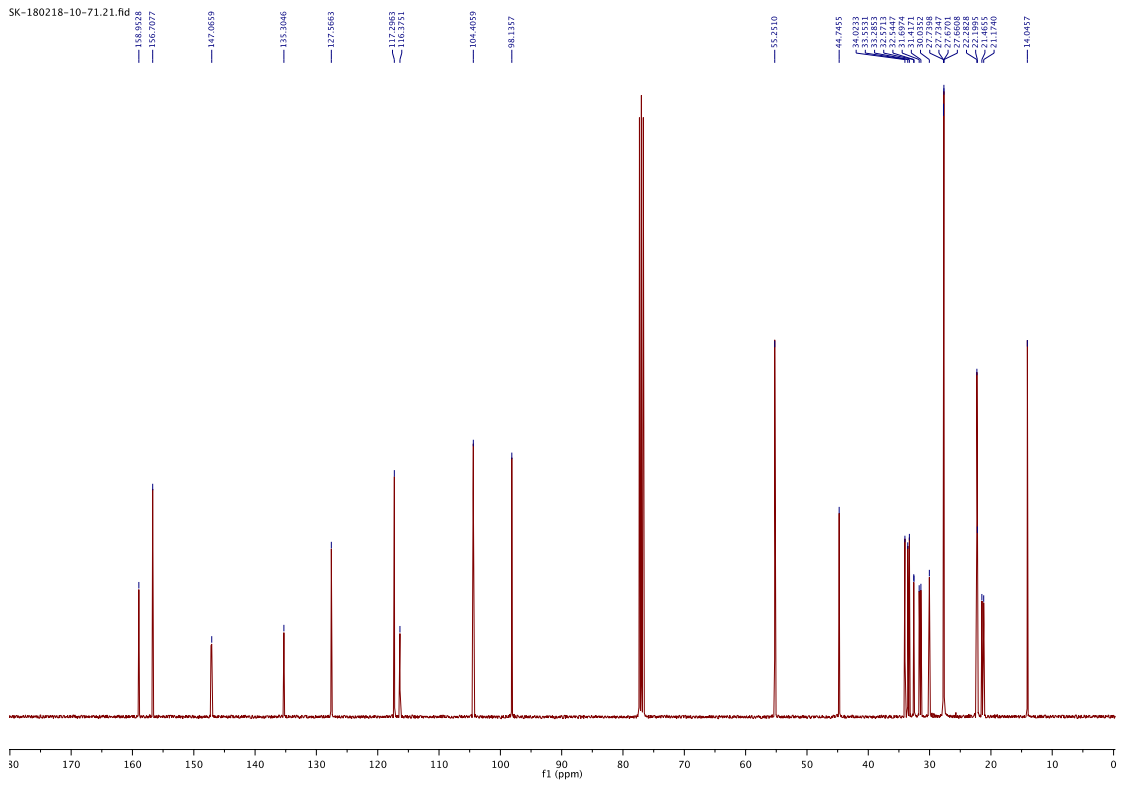

SK-180124-9-291.10.fid

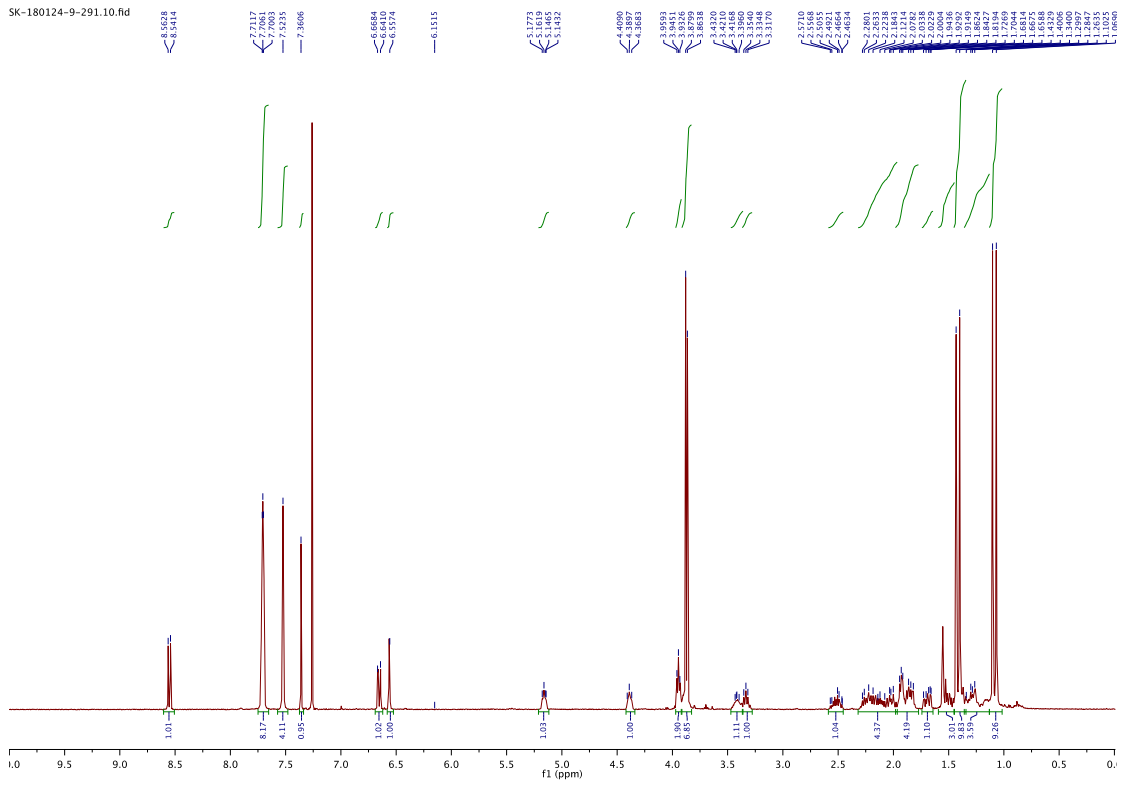

SK-180124-9-291.11.fid

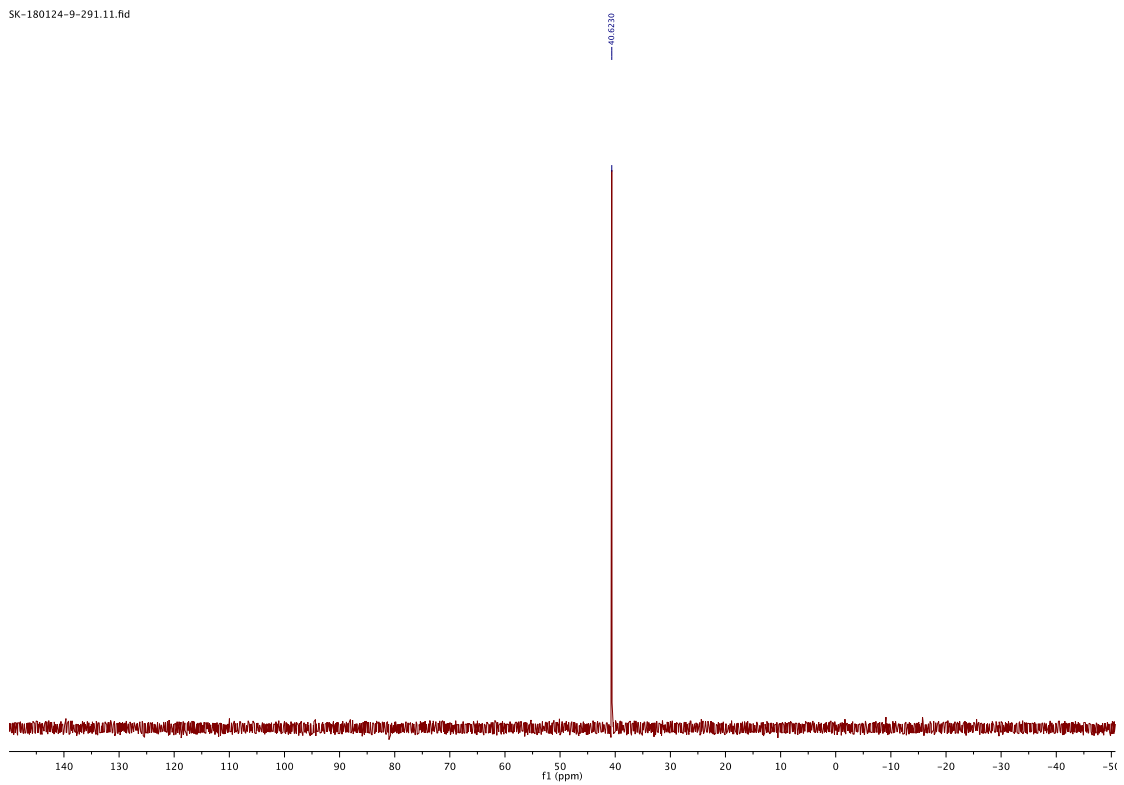



## 6. $^1\text{H}$ and $^{13}\text{C}$ NMR spectroscopic data for the hydrogenated products

All the hydrogenated products in this study have been reported.

SK-170925-9-147column.10.fid

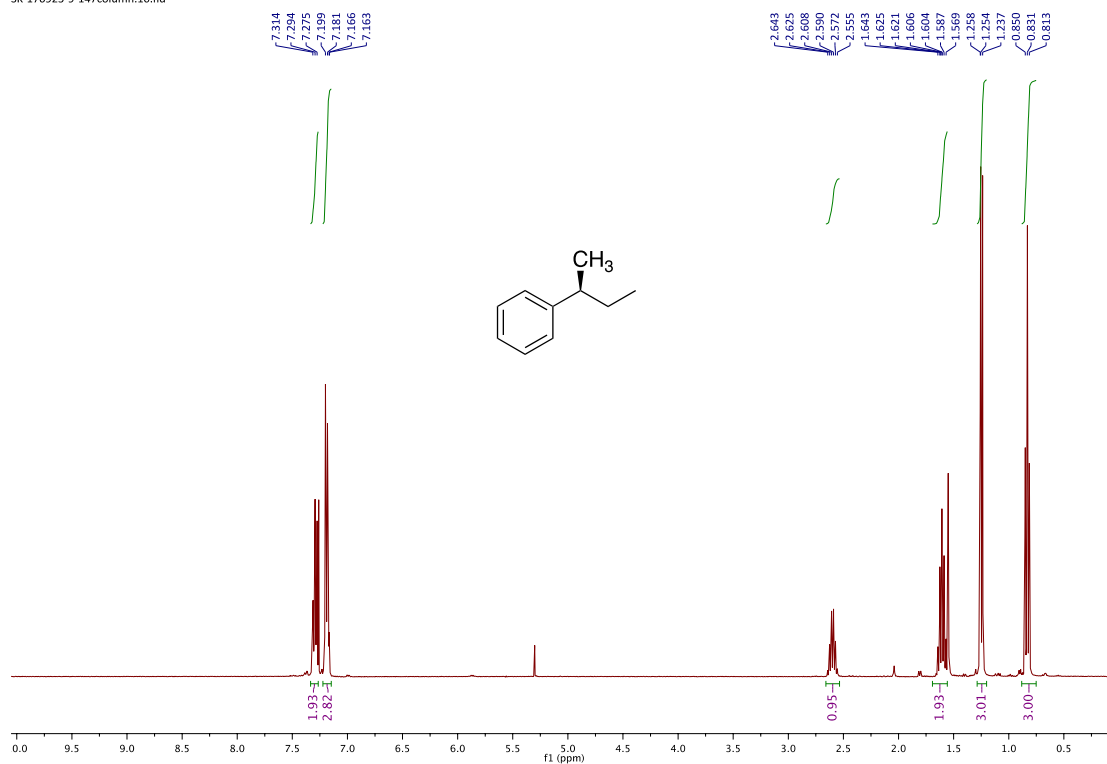

SK-170928-9-166column.10.fid

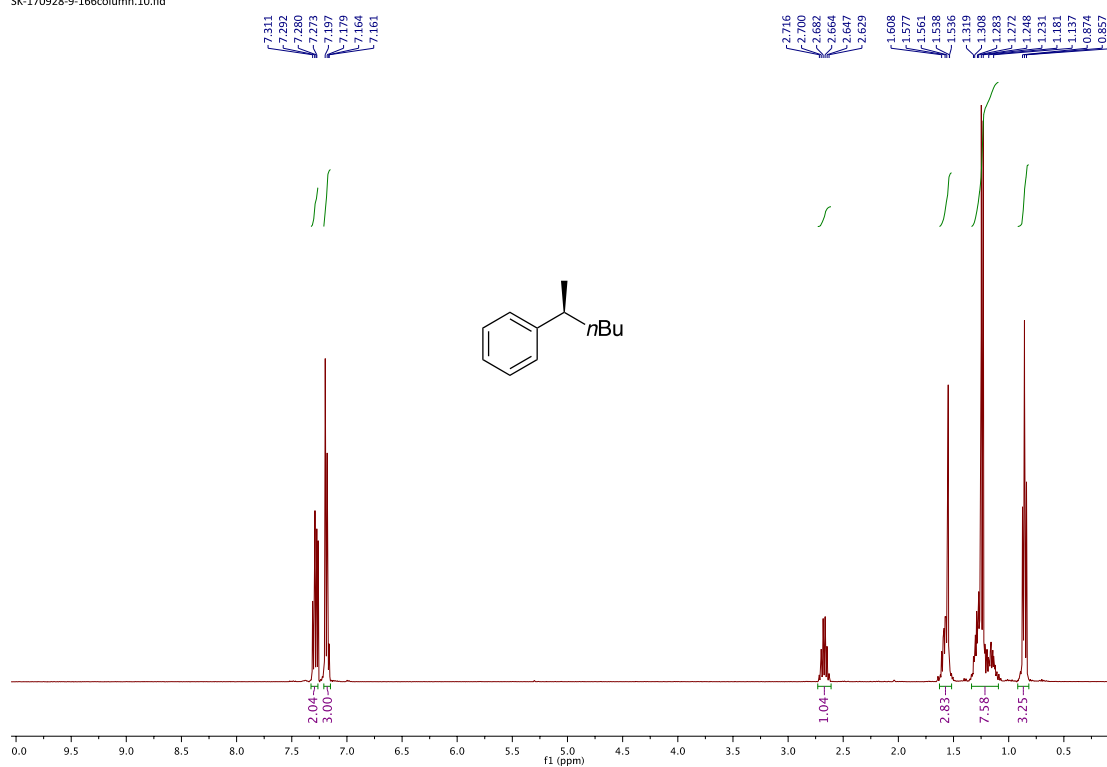

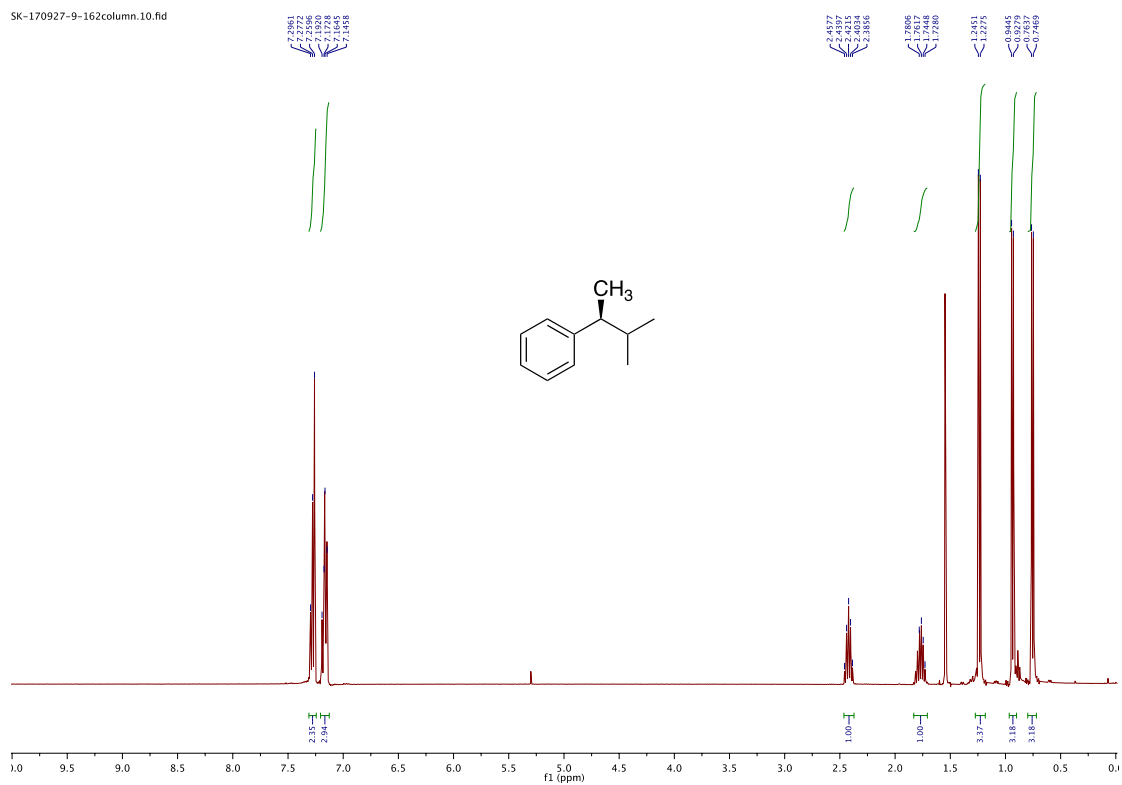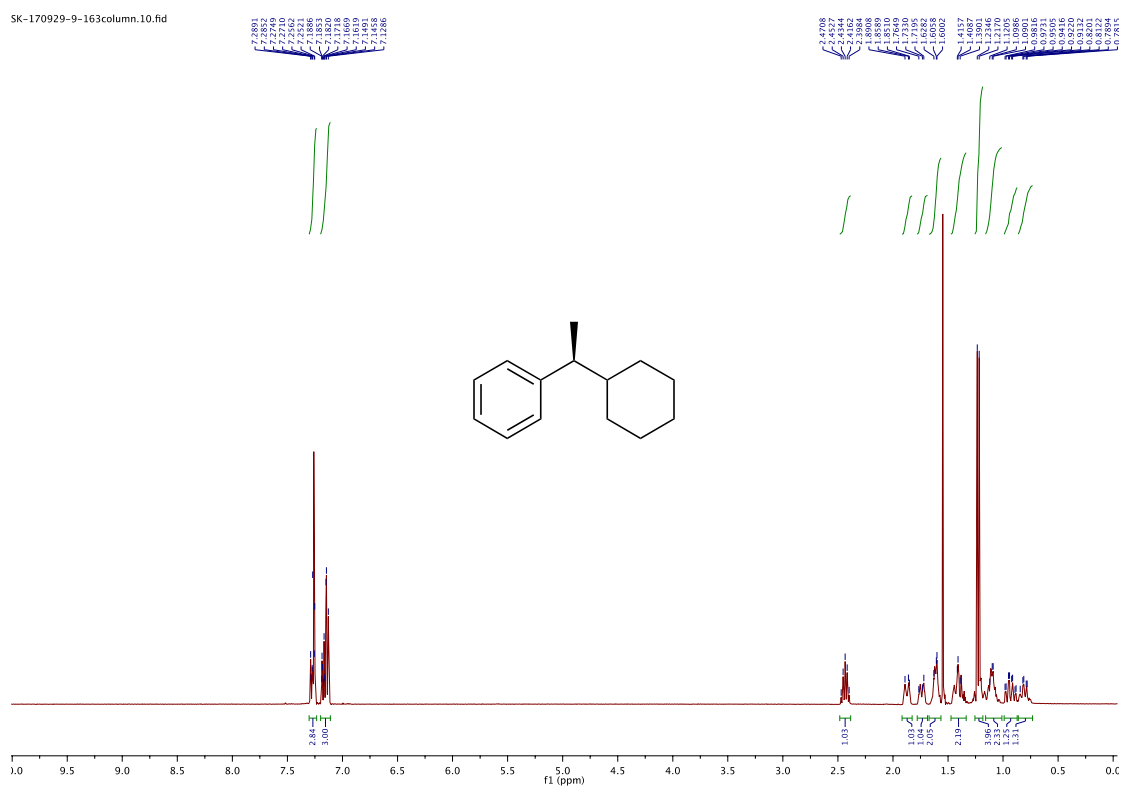



SK-170926-9-150column.10.fid

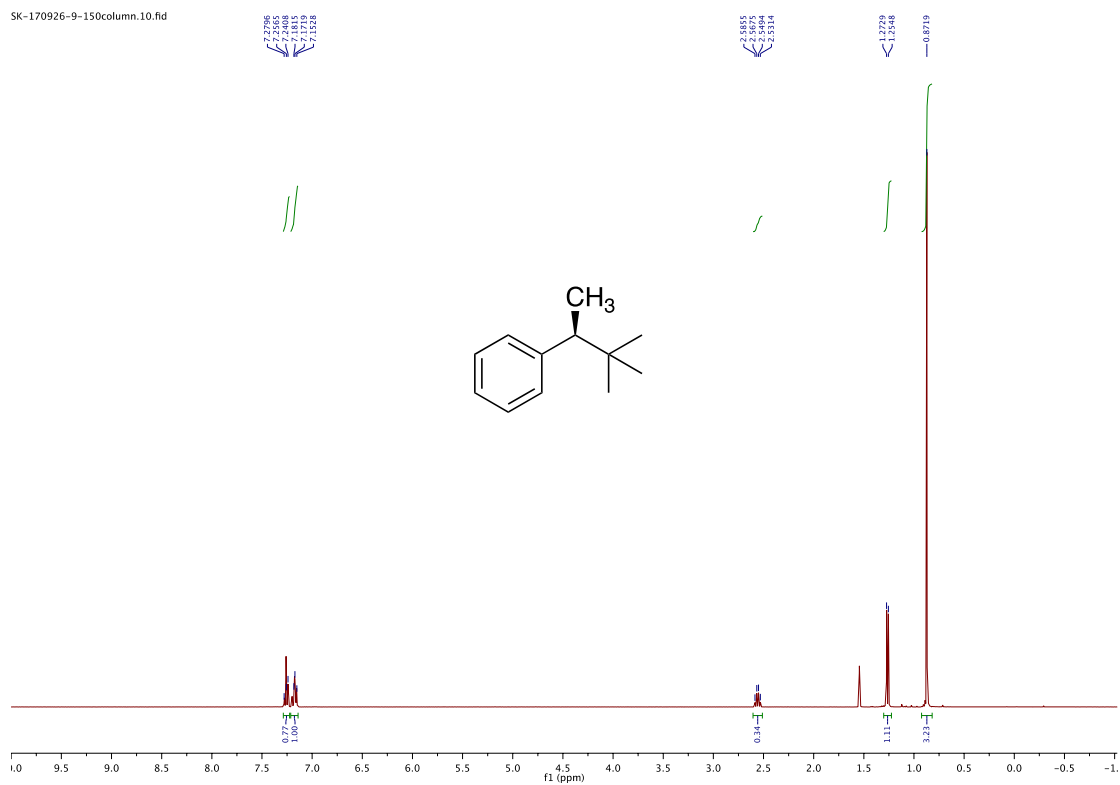

SK-171219-10-045column.10.fid

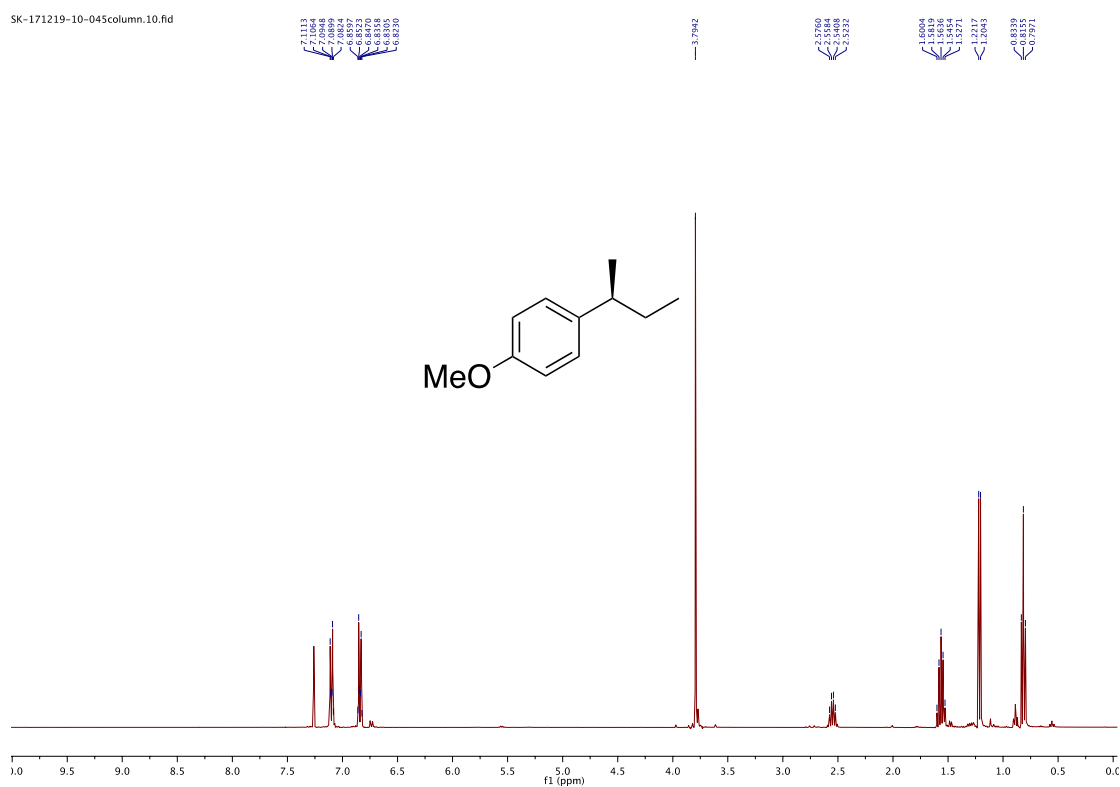

SK-171002-9-158column.10.fid

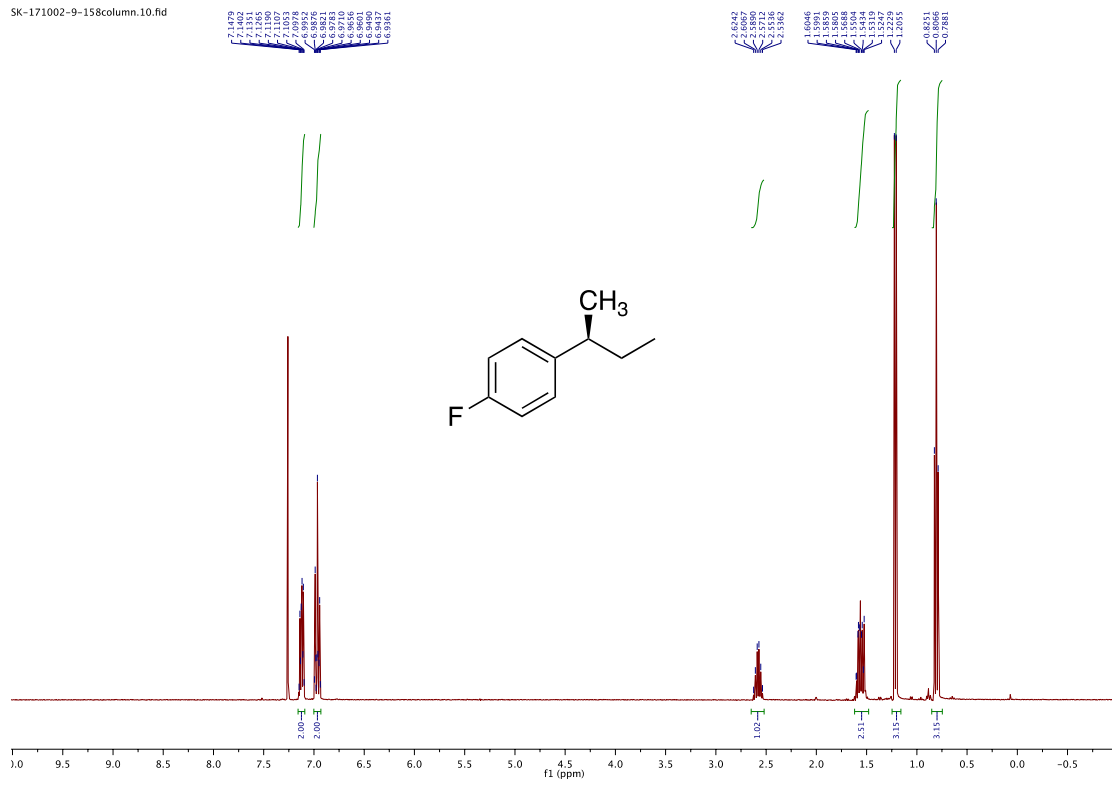

SK-170926-9-154column.10.fid

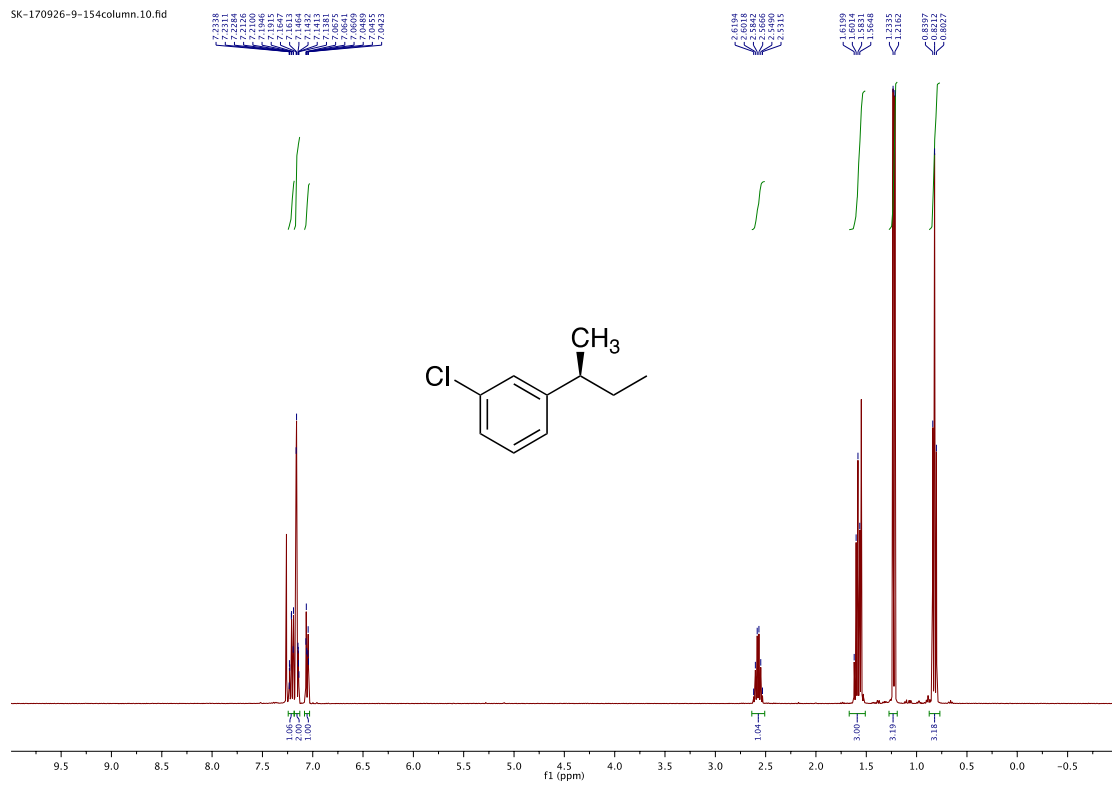



SK-171003-9-177column.10.fid

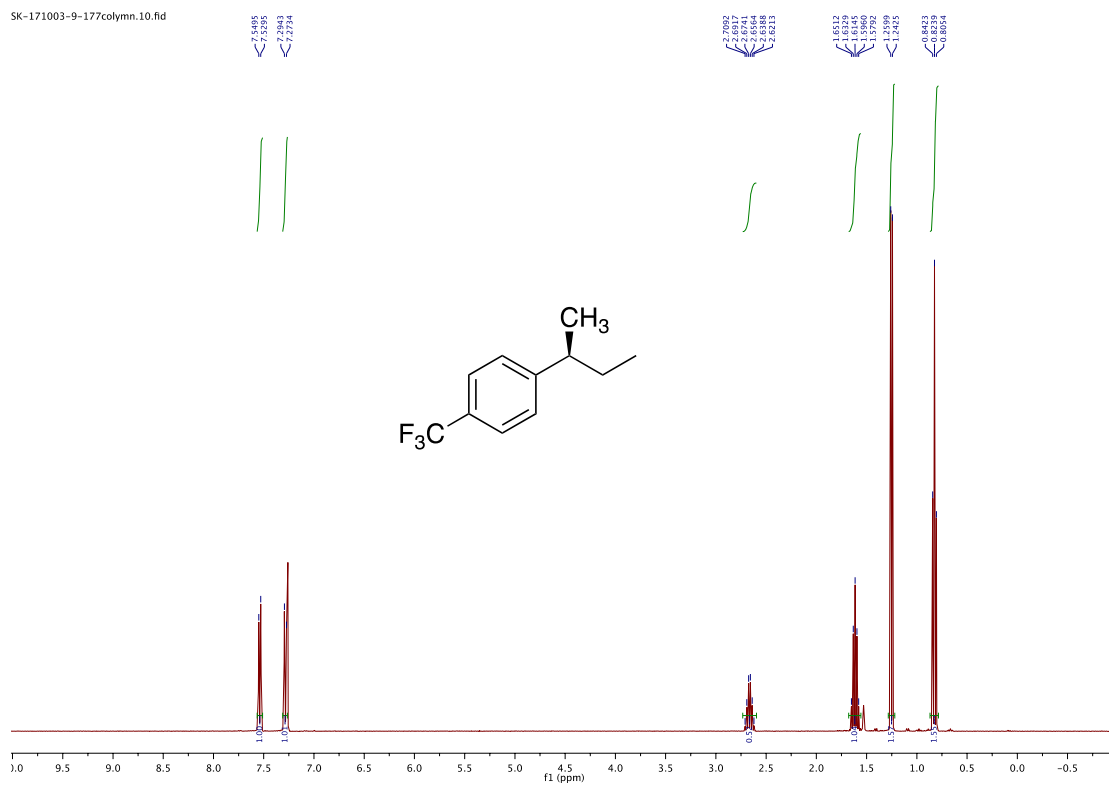

SK-170930-9-175column.10.fid

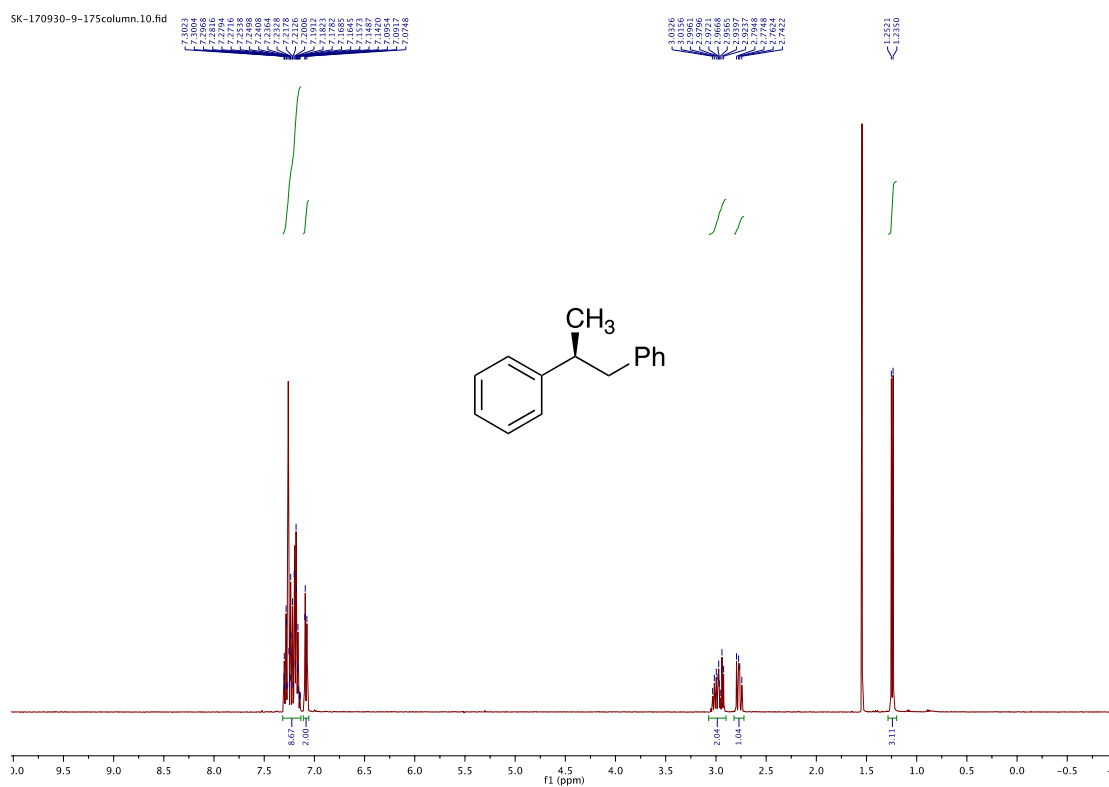

SK-180406-10-197column.10.fid

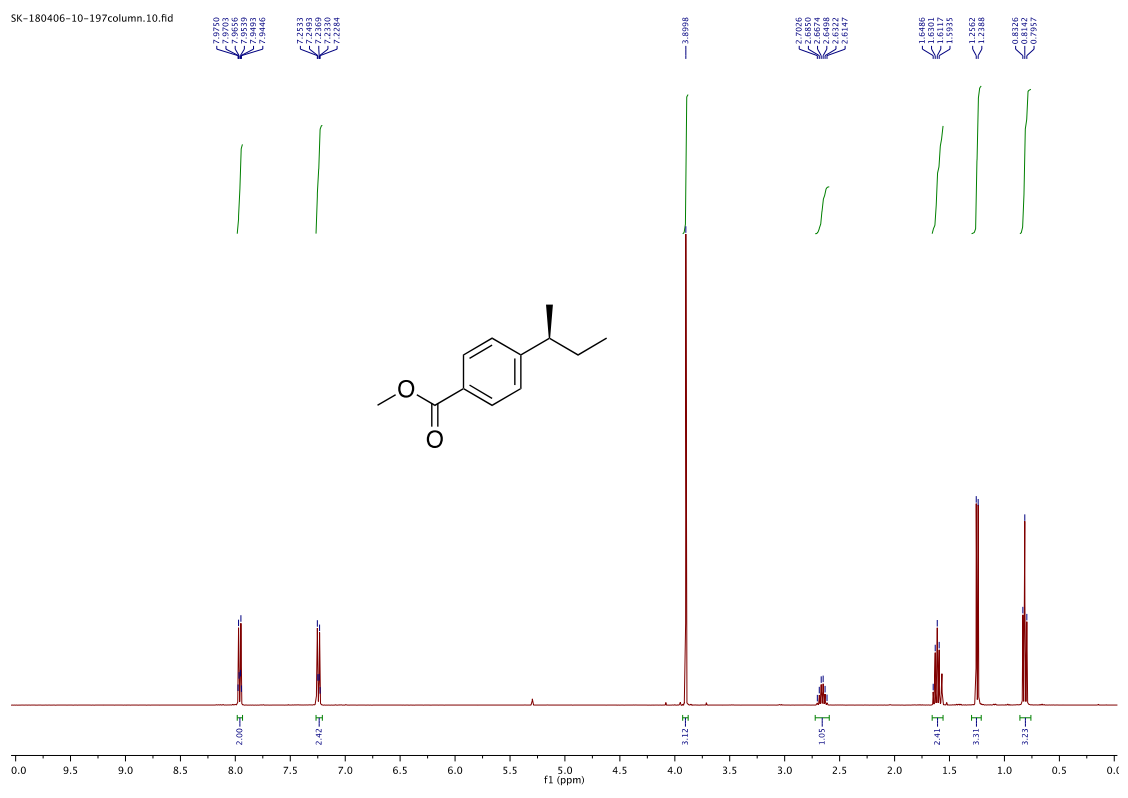

SK-180418-10-220A column.10.fid

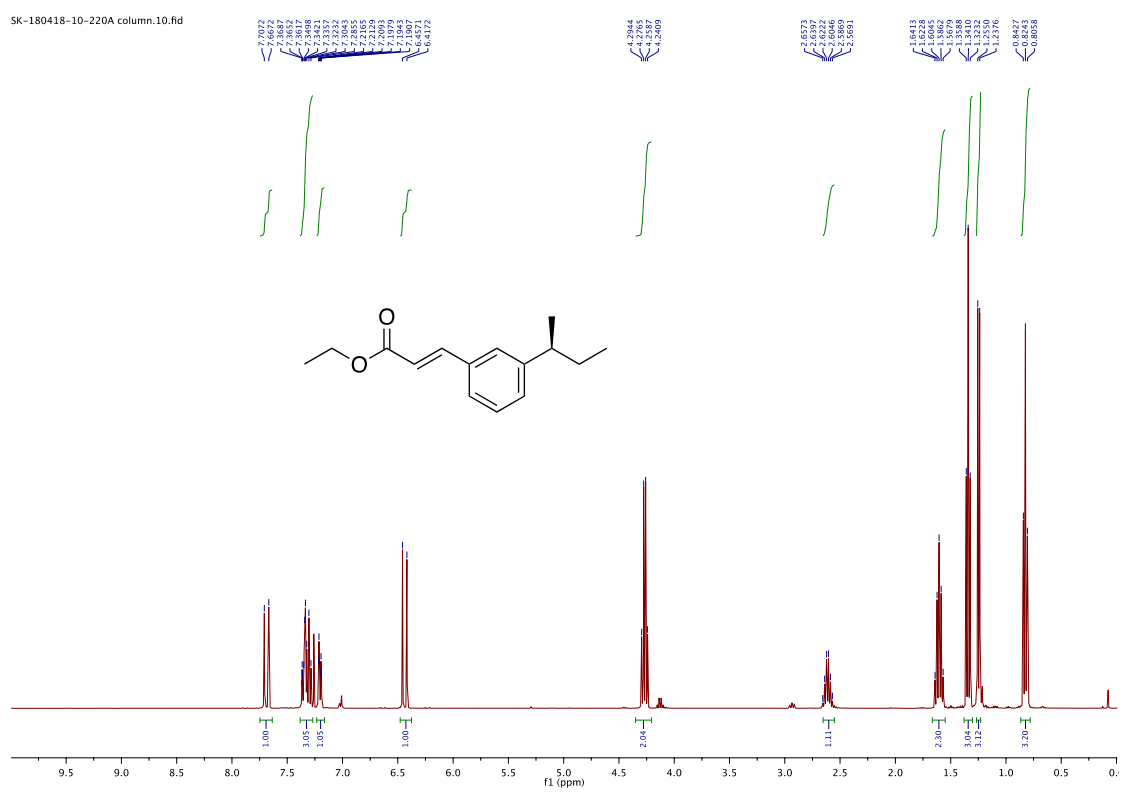

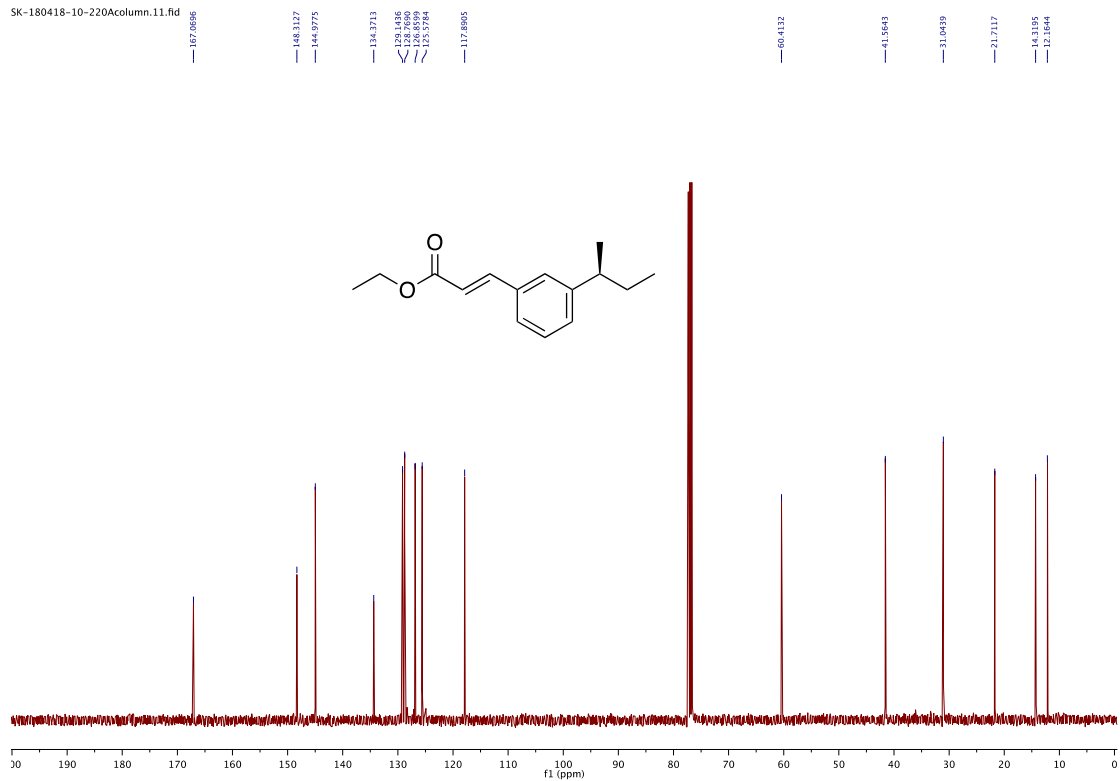

# 7. <sup>1</sup>H and <sup>13</sup>C NMR spectroscopic data of (S)-(+)-curmurene

hvu-18091302-151p

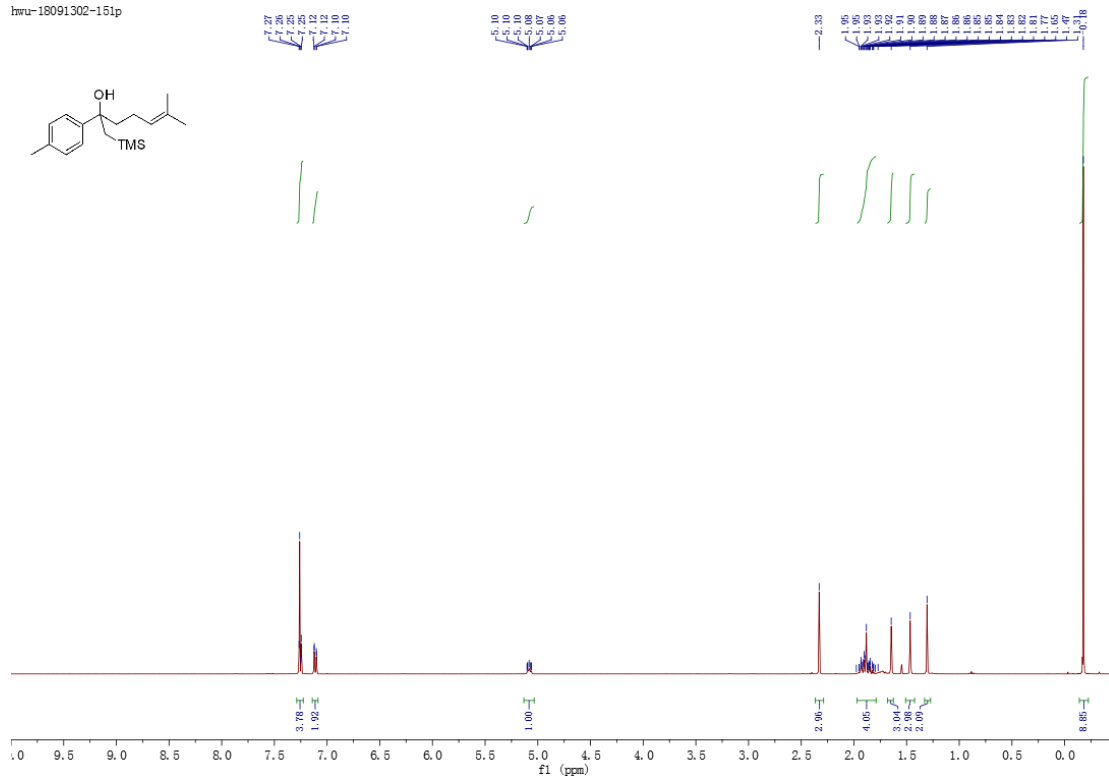

hvu-18091302-151p

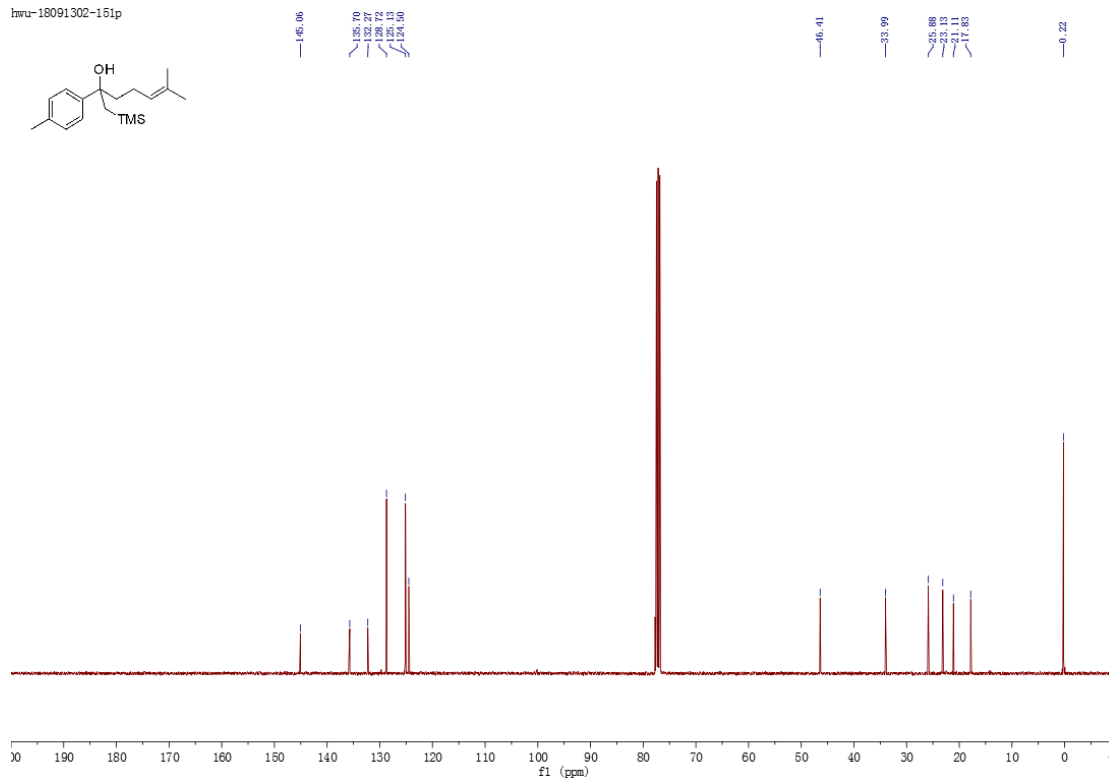

hwu-181004-202-16exp

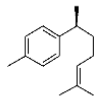

(+) curmuene

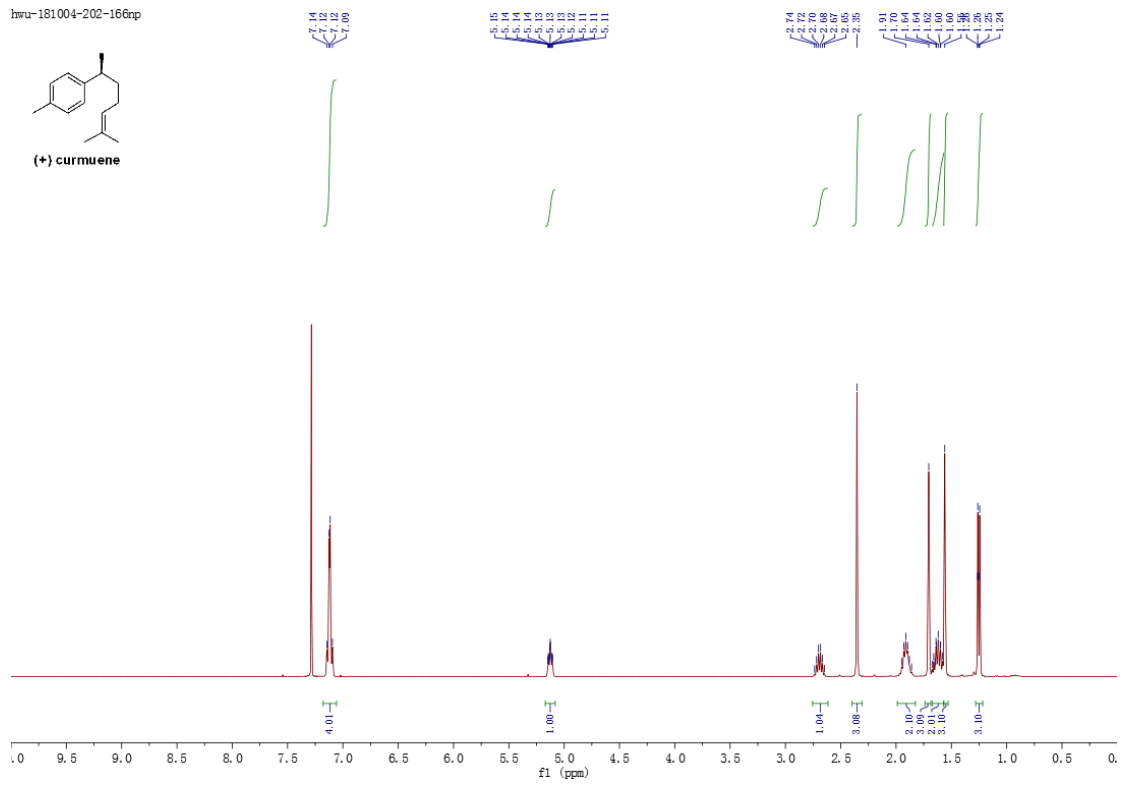

hwu-18091302-151p

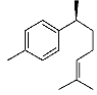

(+) curmuene

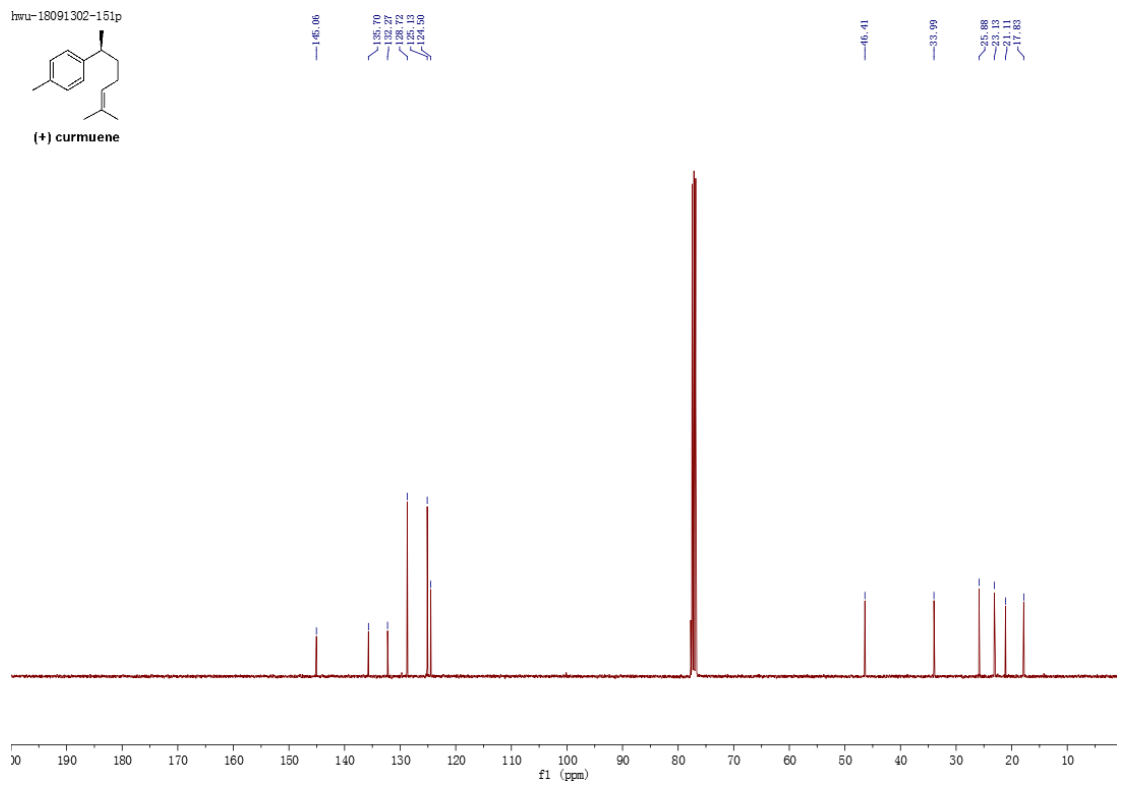



## 8. GC and SFC Chromatograms

Print Date: 28 Dec 2017 18:43:10

### Chromatogram Plots

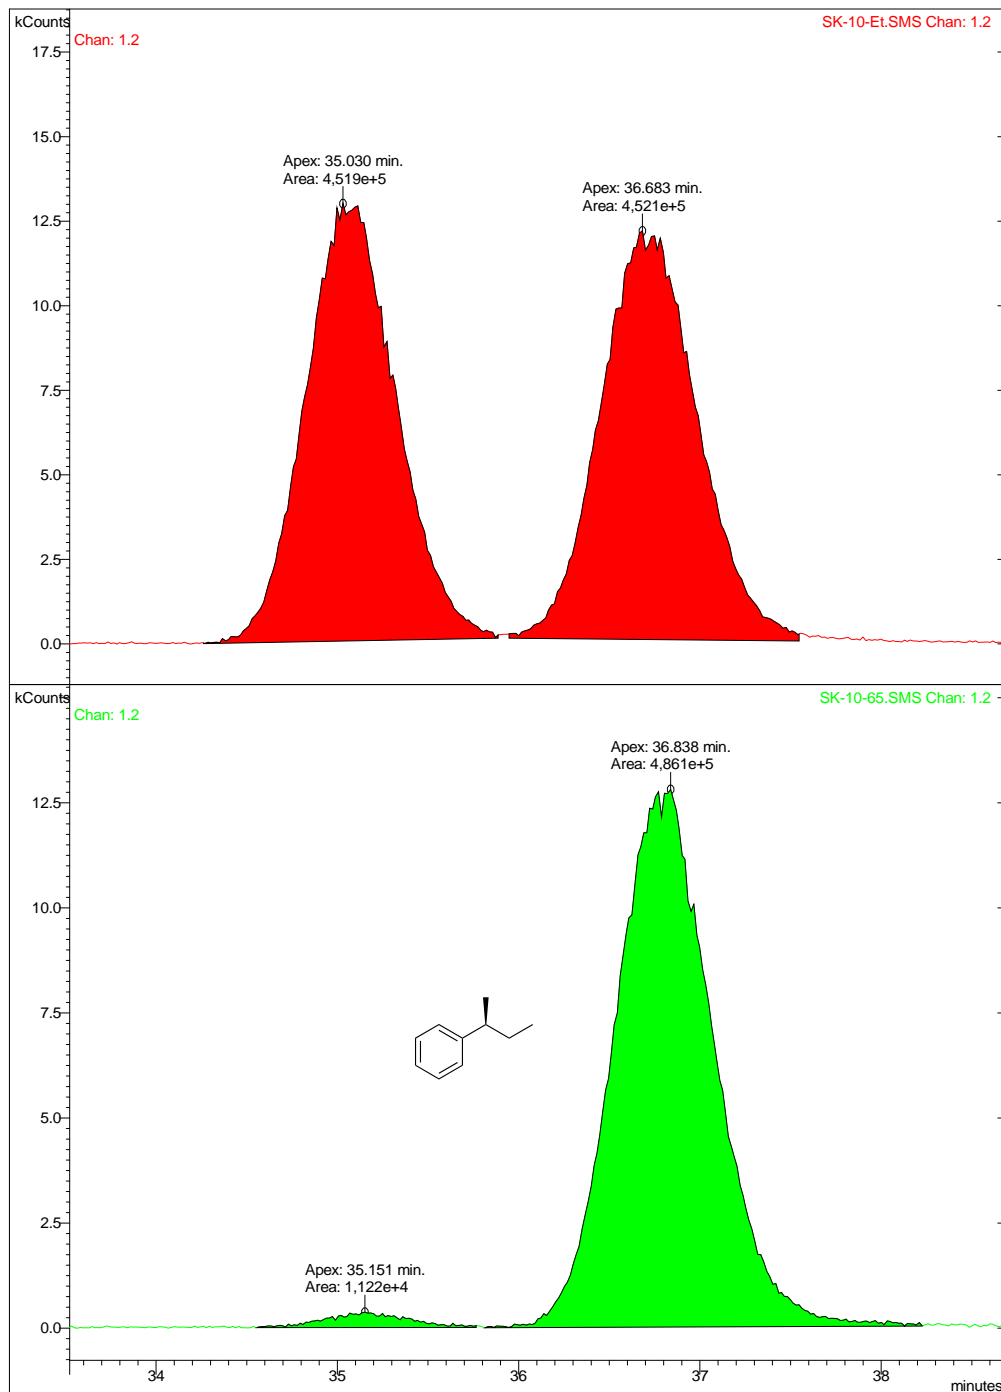

### Chromatogram Plots

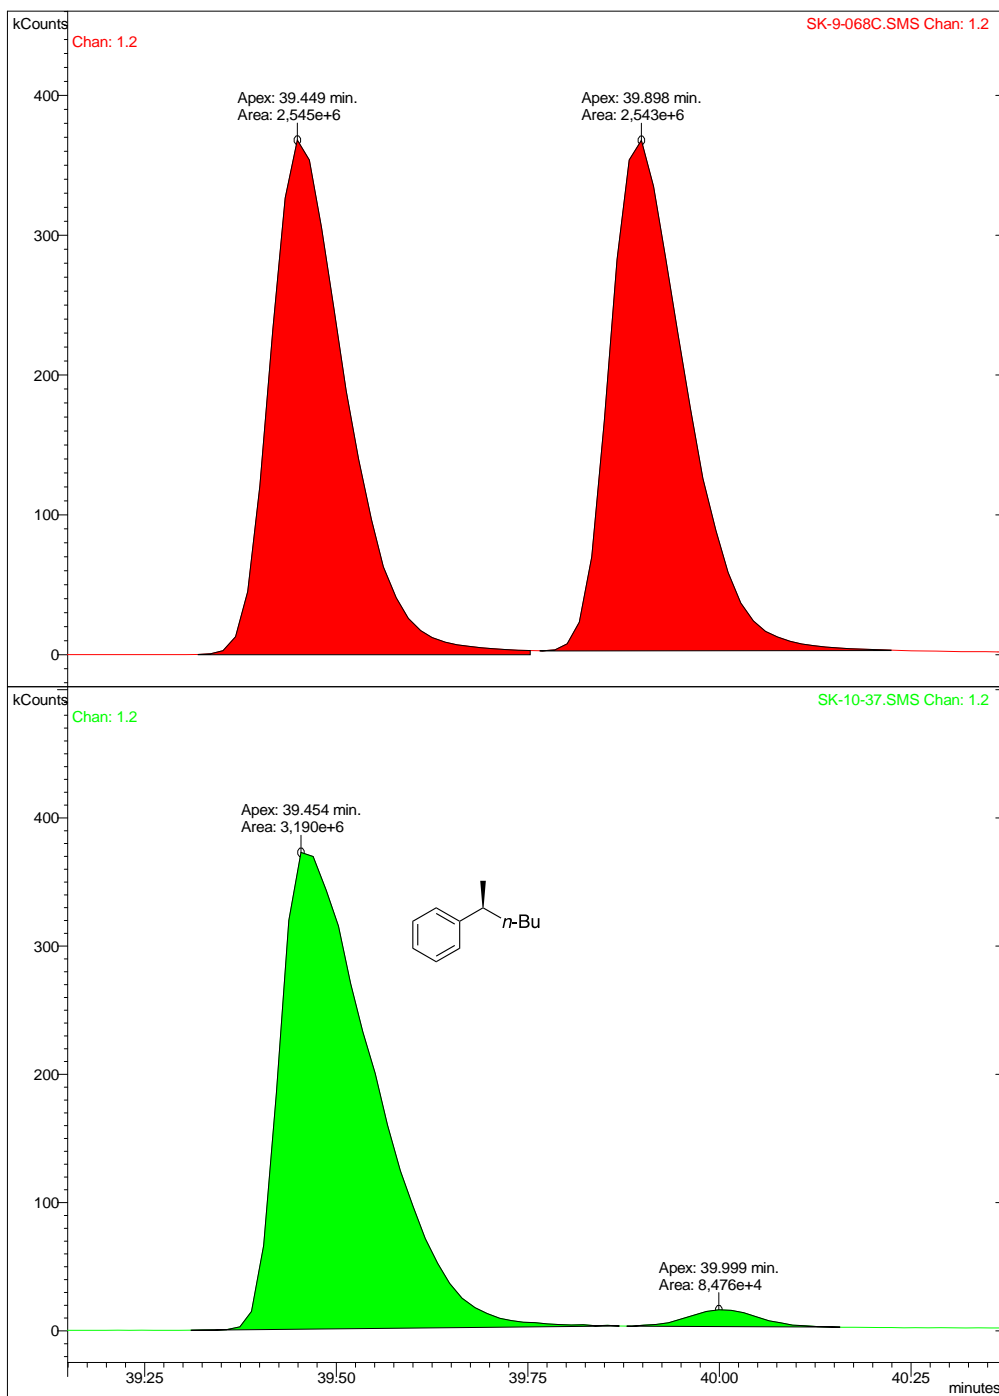

## Chromatogram Plots

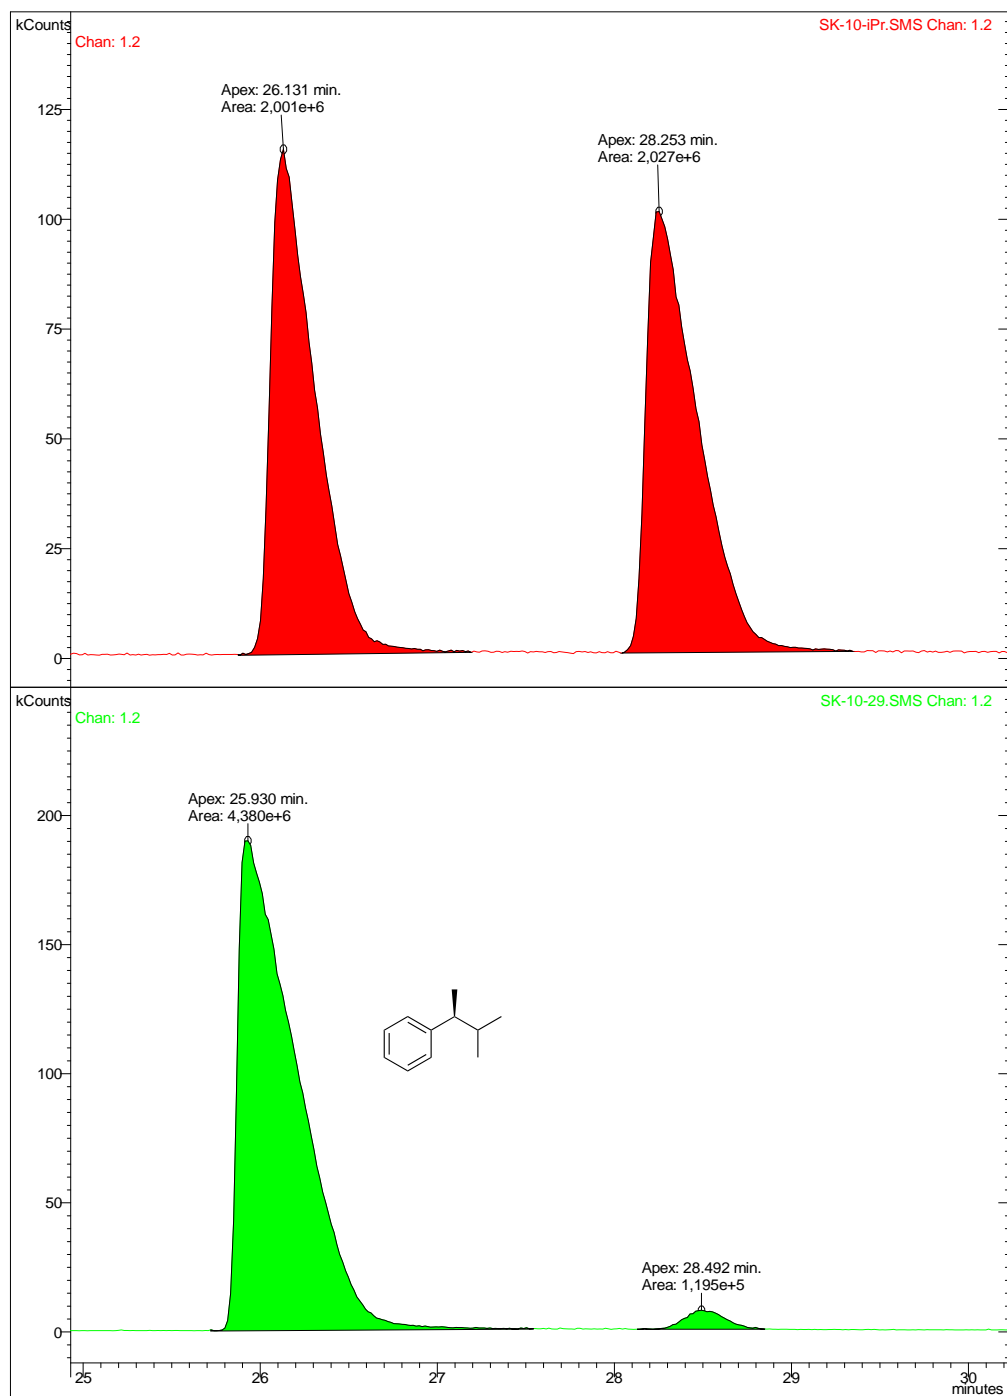

### Chromatogram Plots

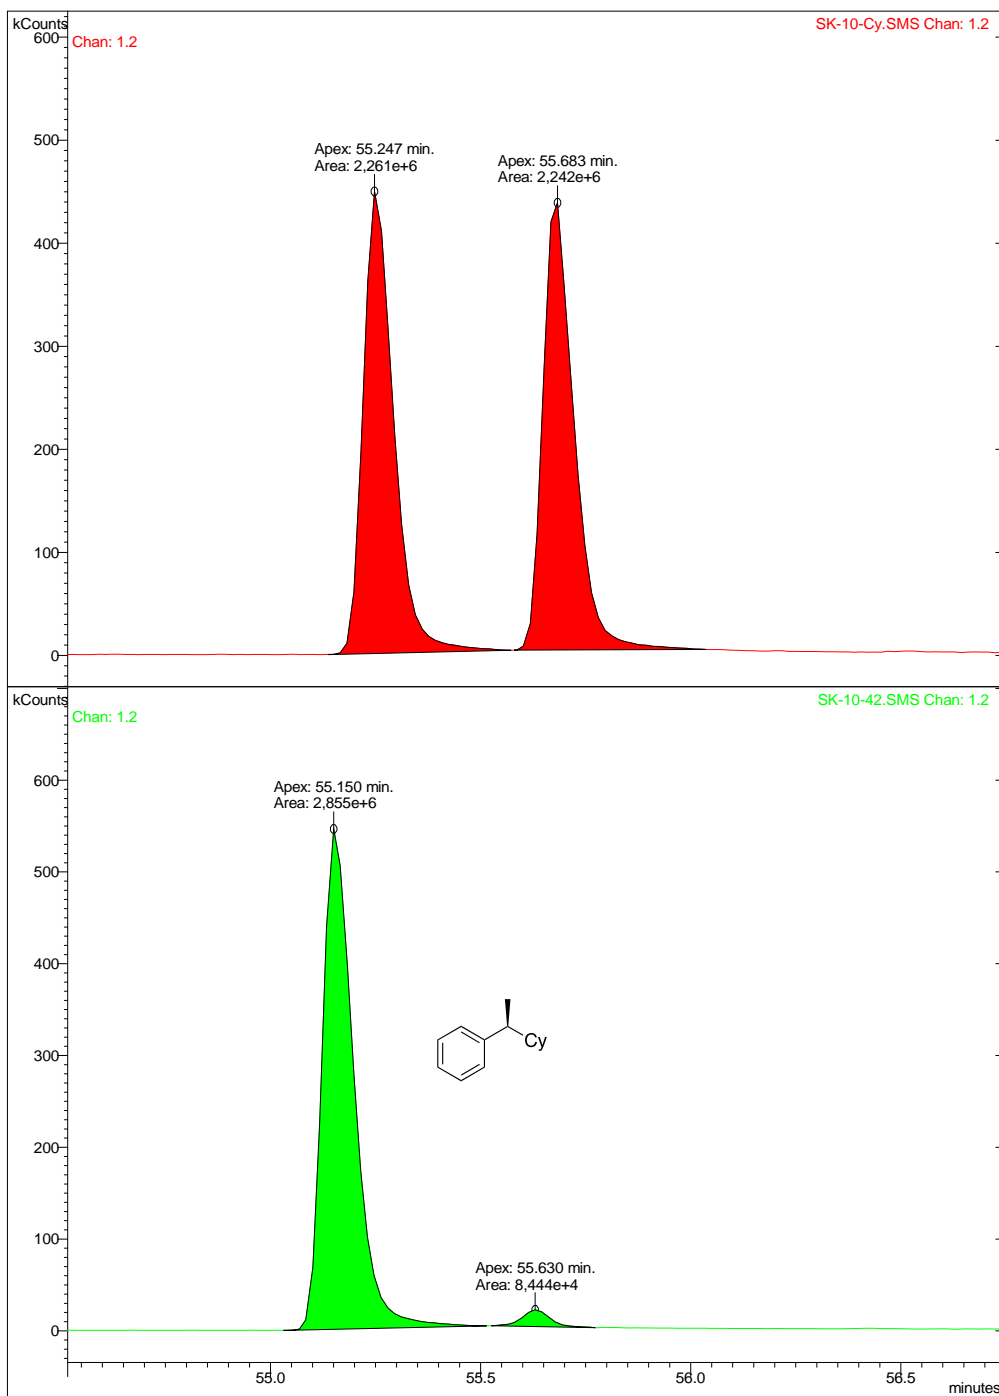

### Chromatogram Plots

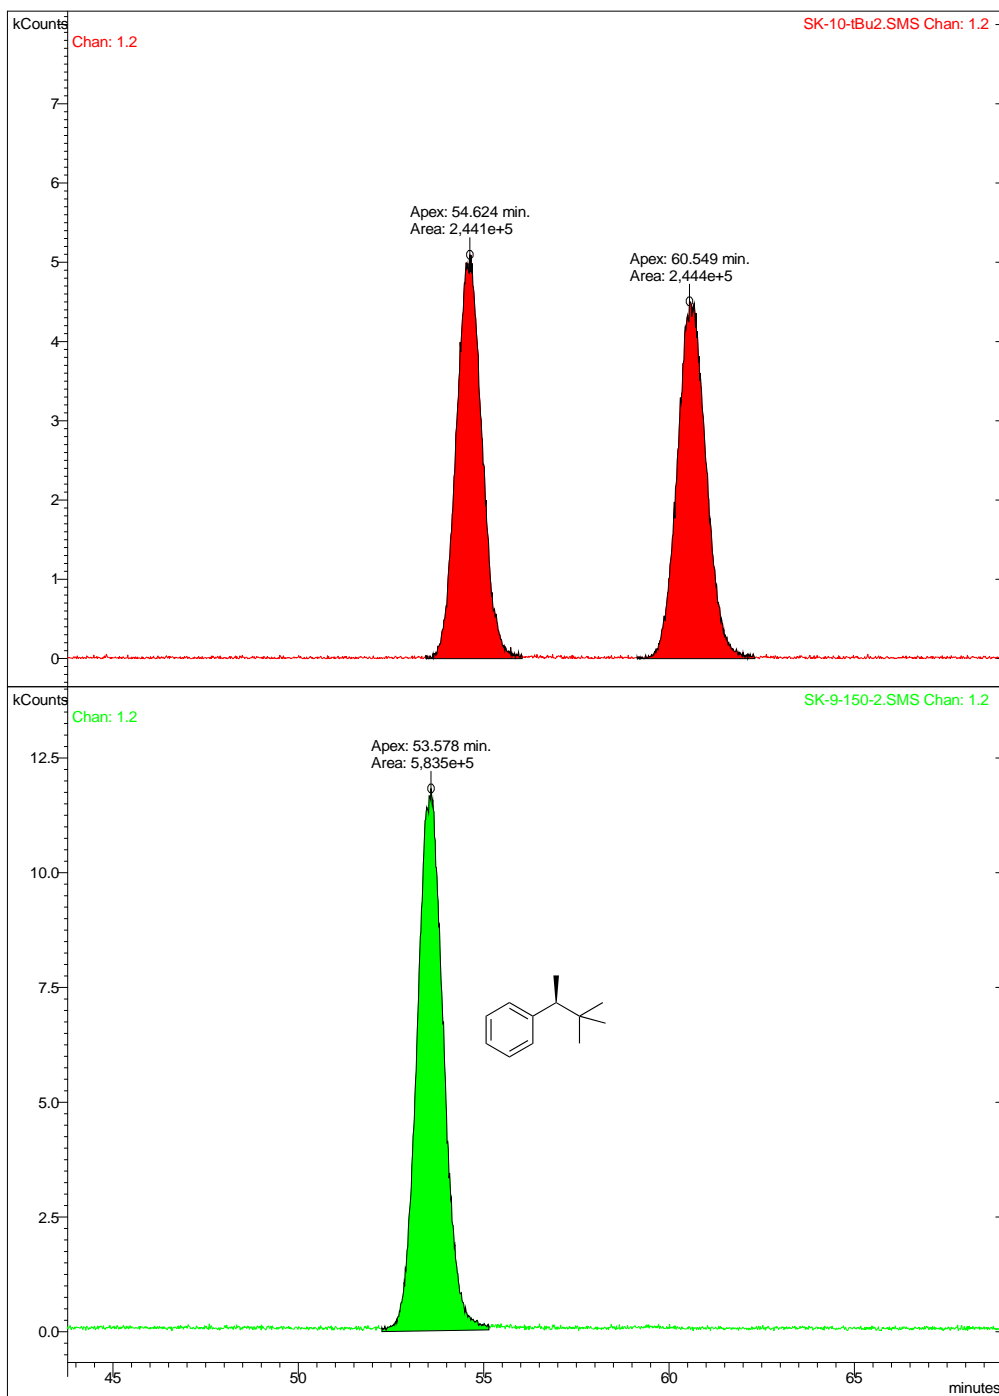

### Chromatogram Plots

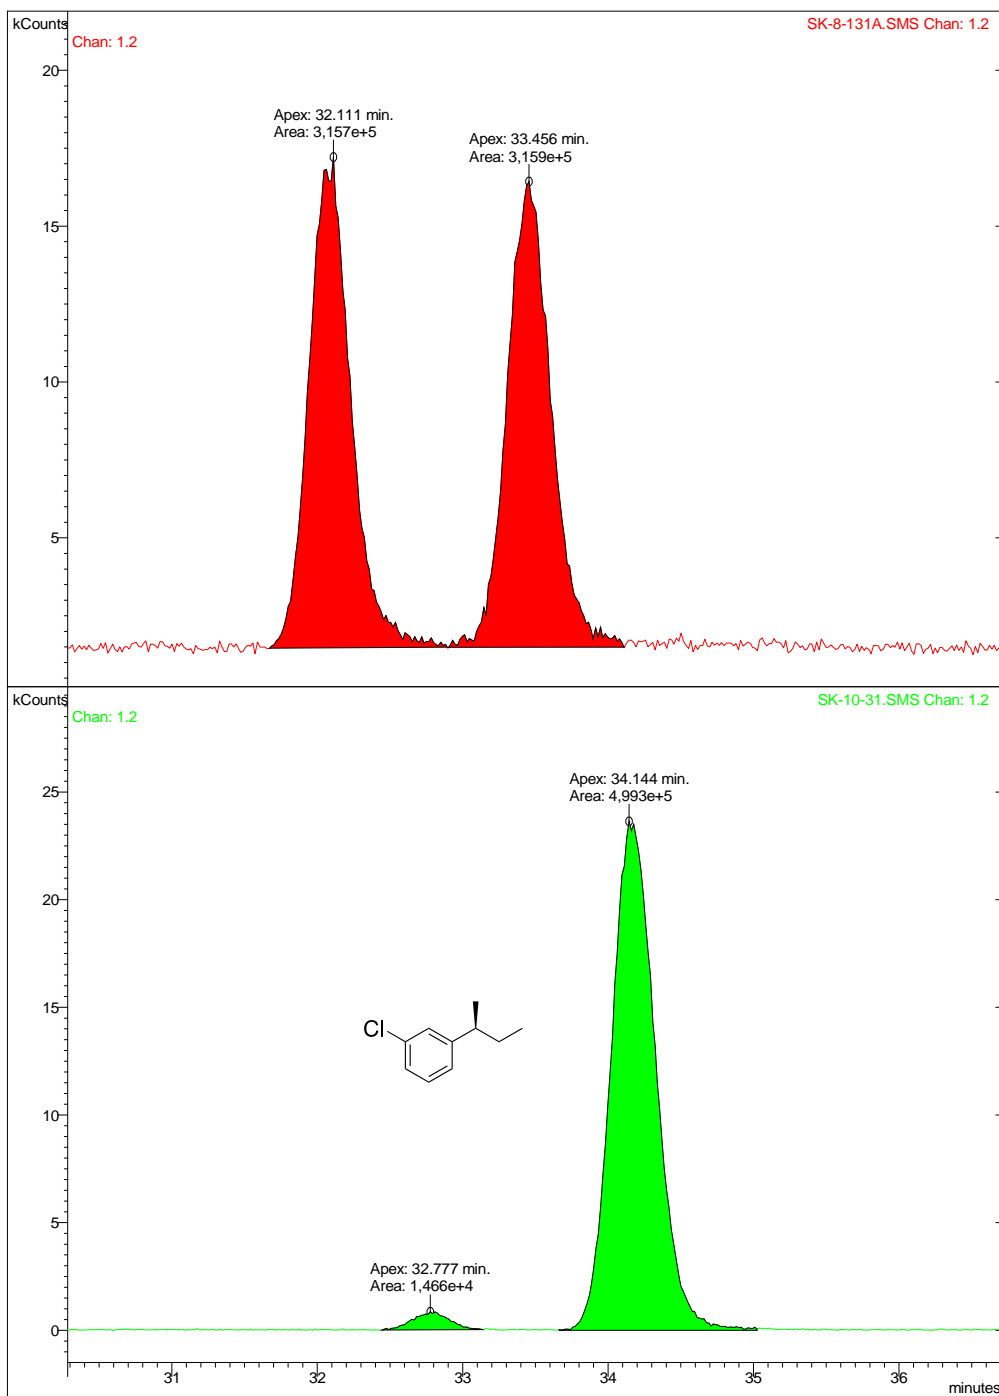

### Chromatogram Plots

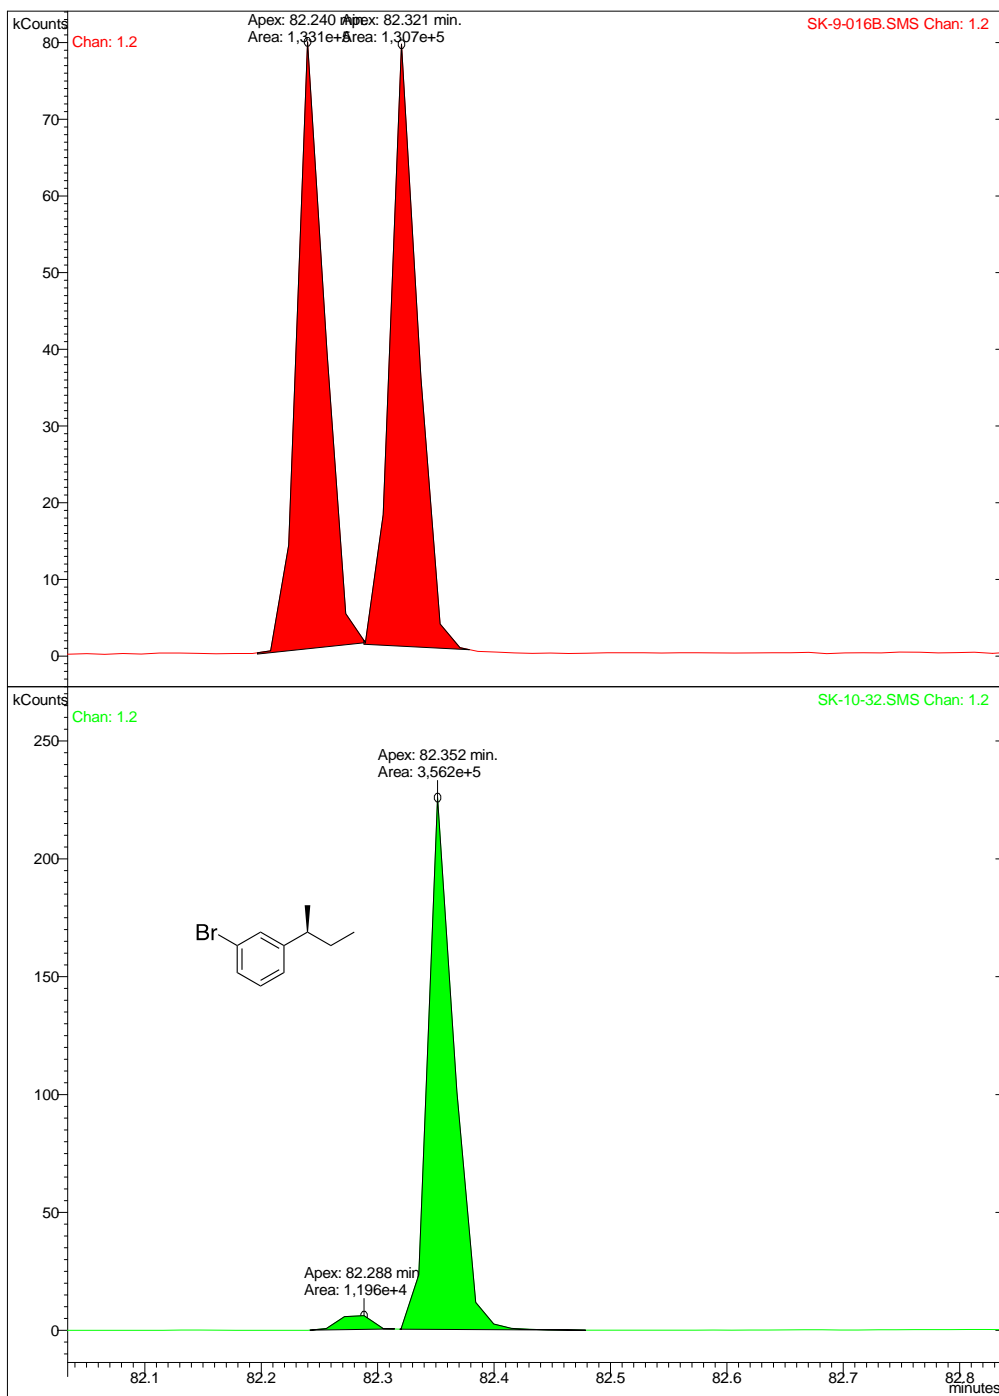

### Chromatogram Plots

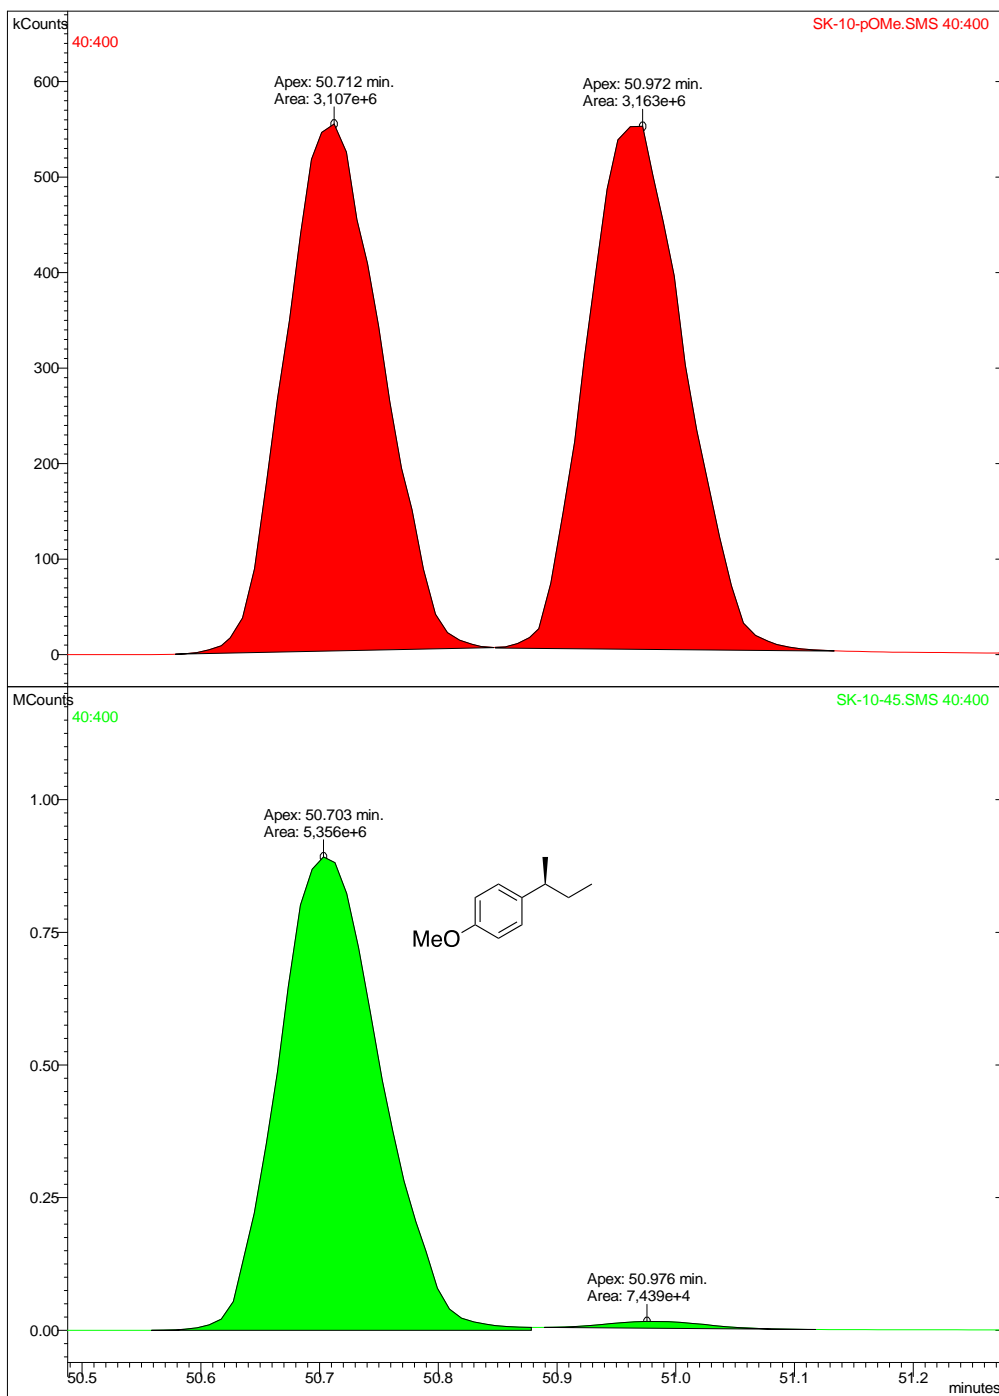



### Chromatogram Plots

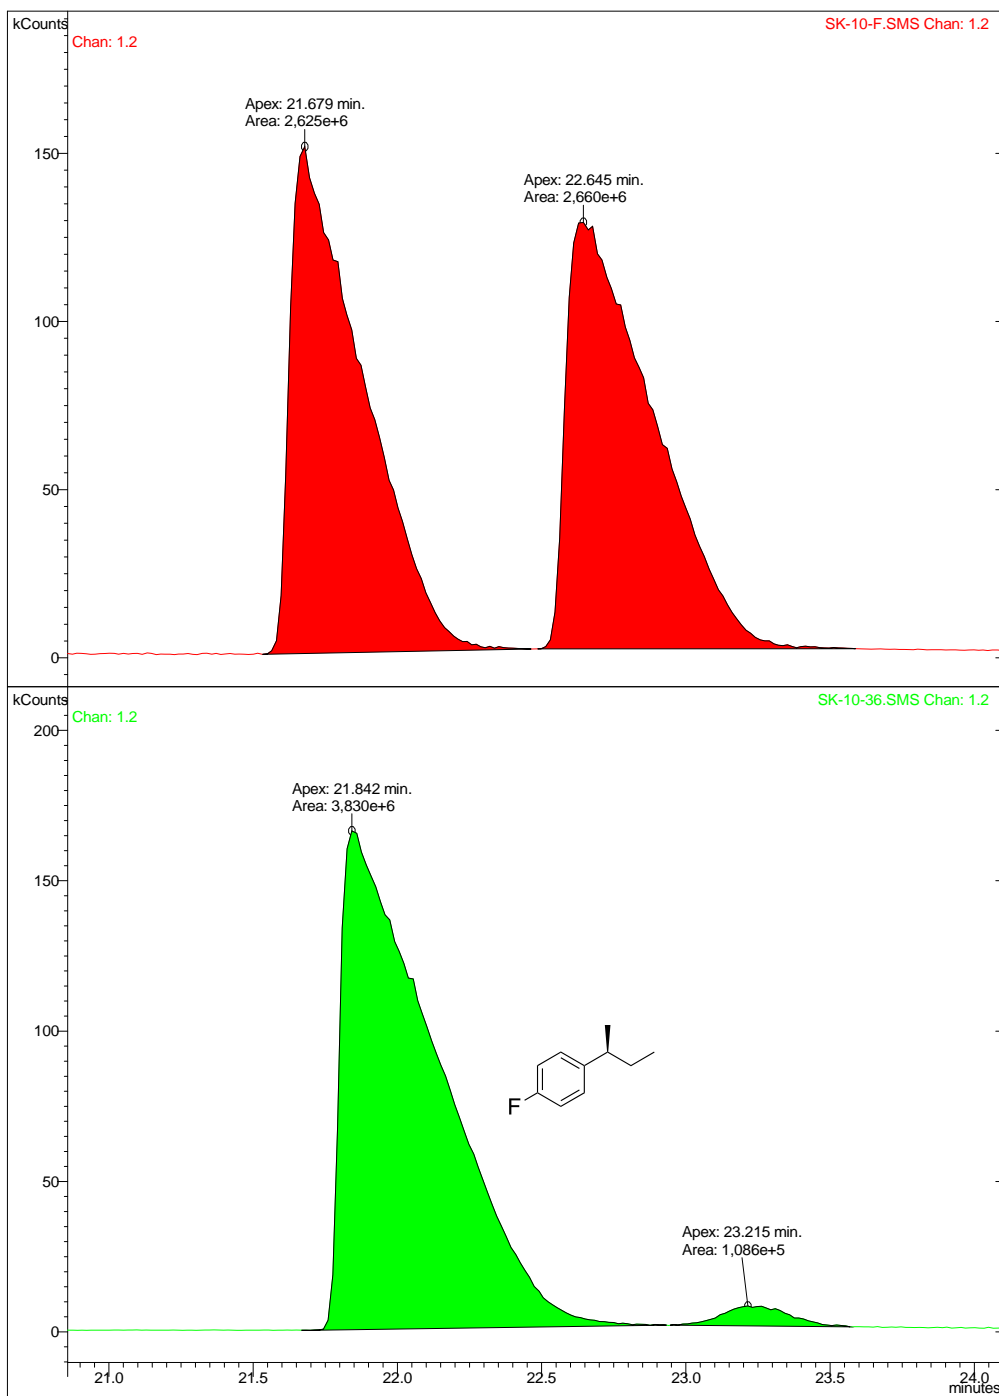

### Chromatogram Plots

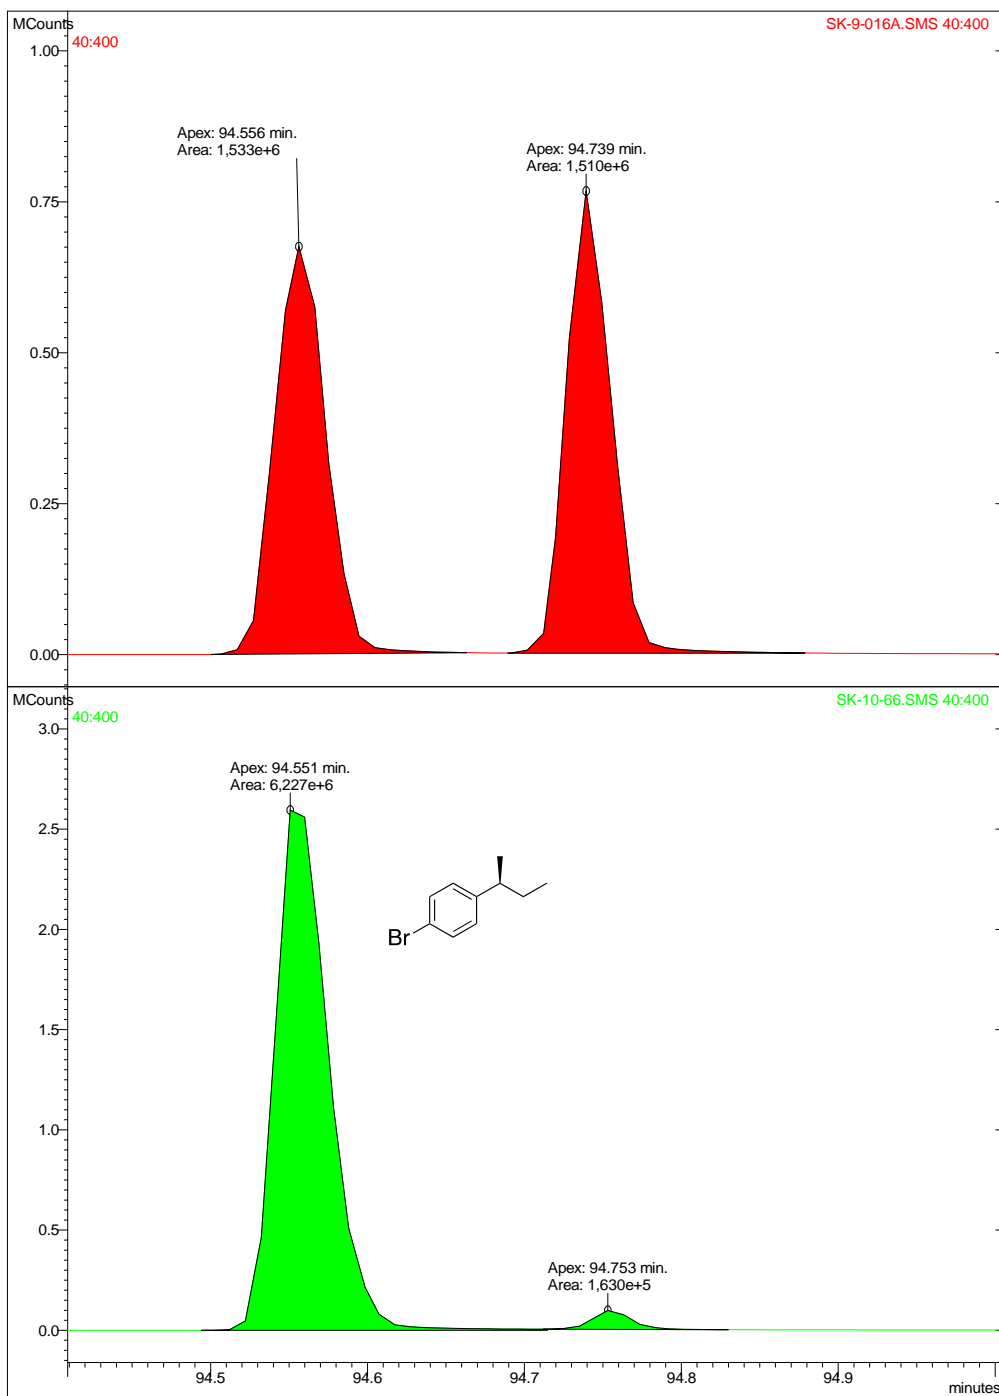

### Chromatogram Plots

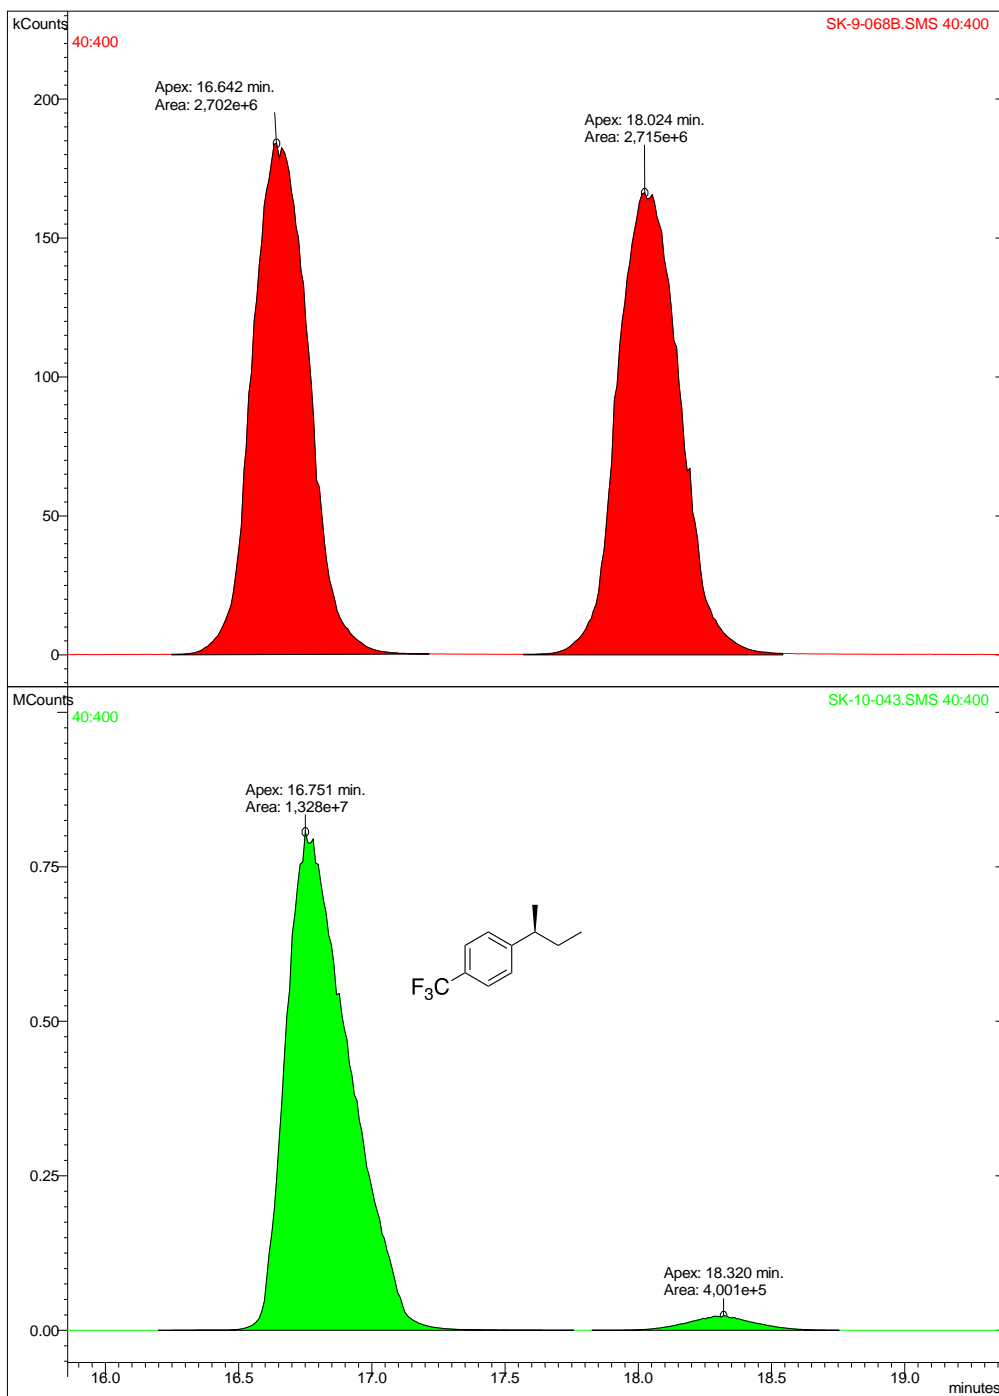

# Chromatogram Plots

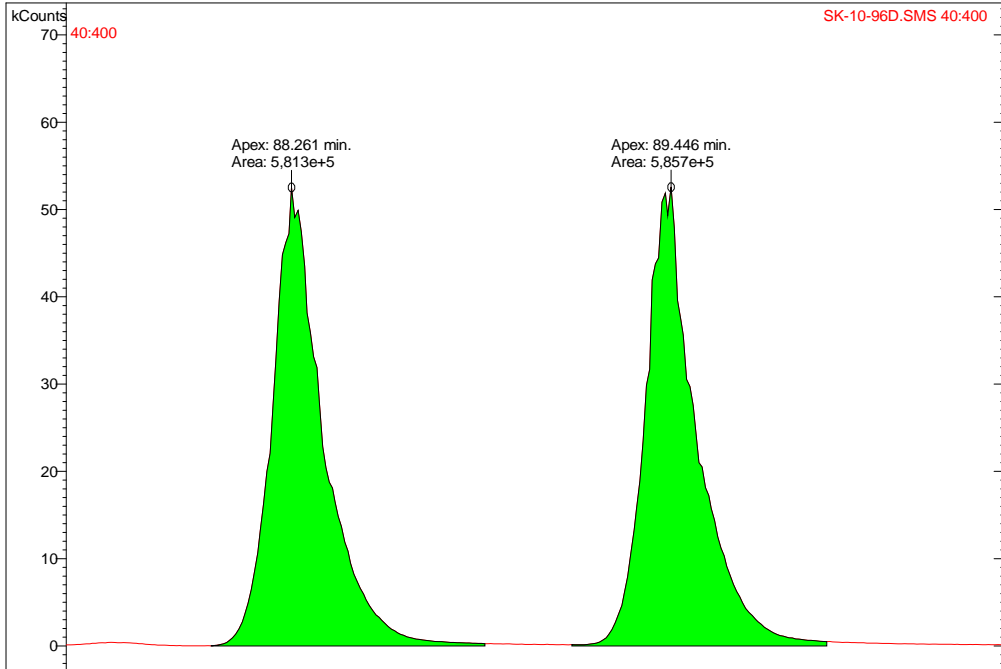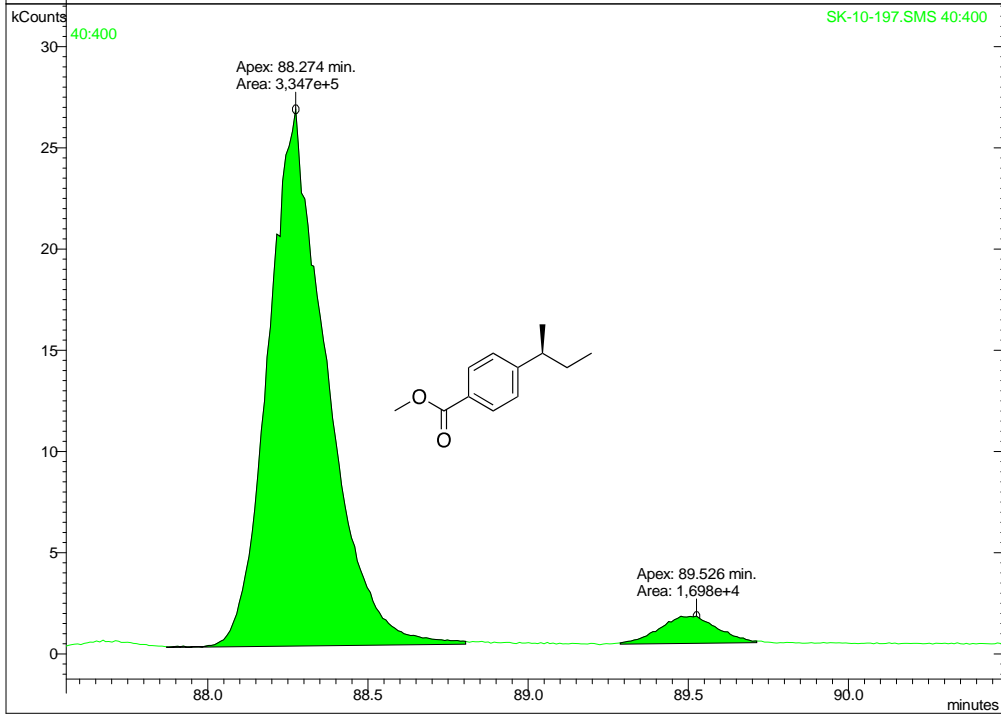

# SFC chromatogram

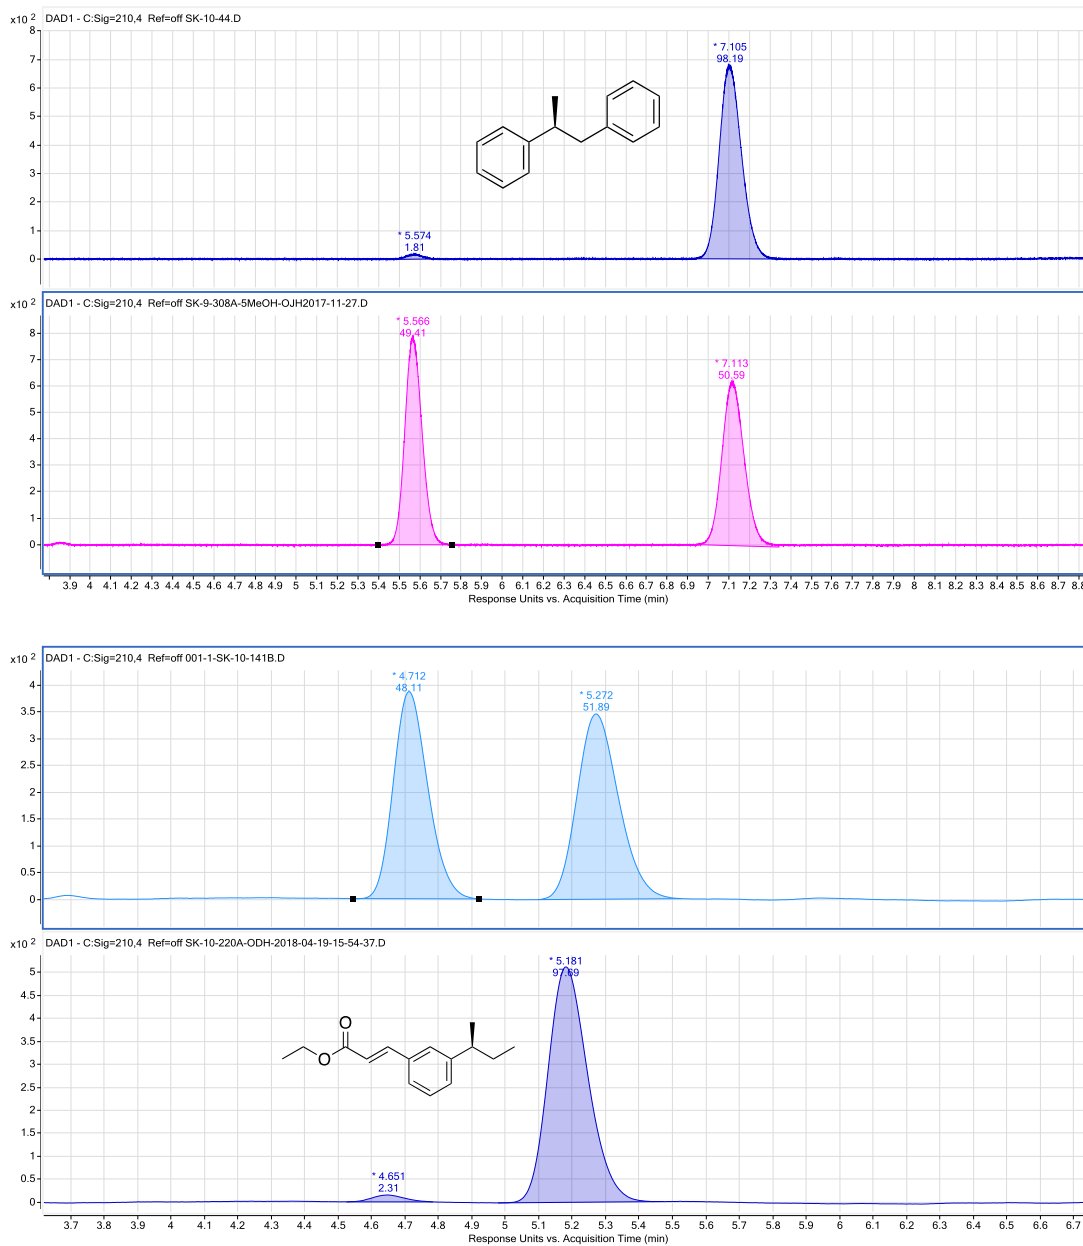

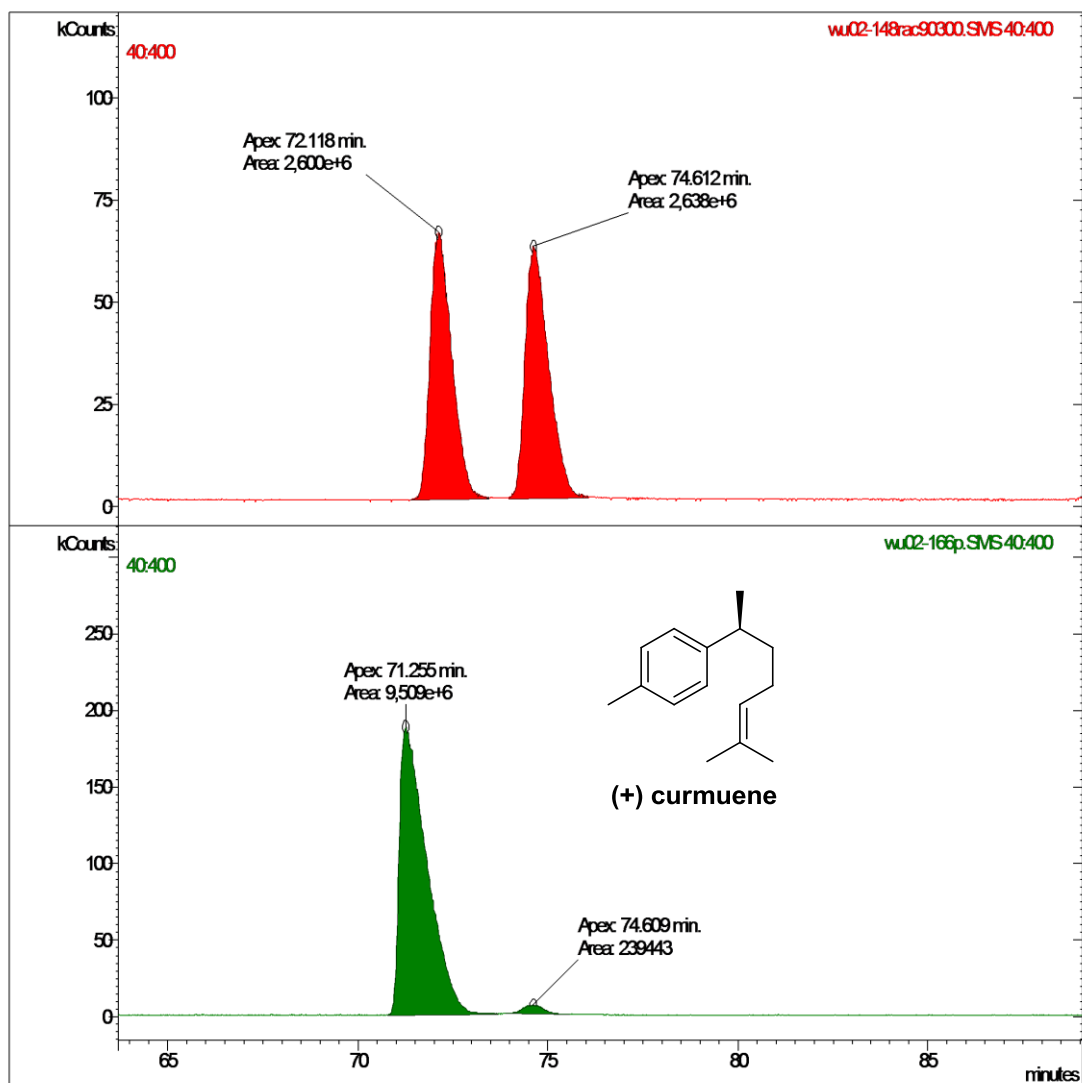

## 9. NMR spectra and chromatograms for the competition study

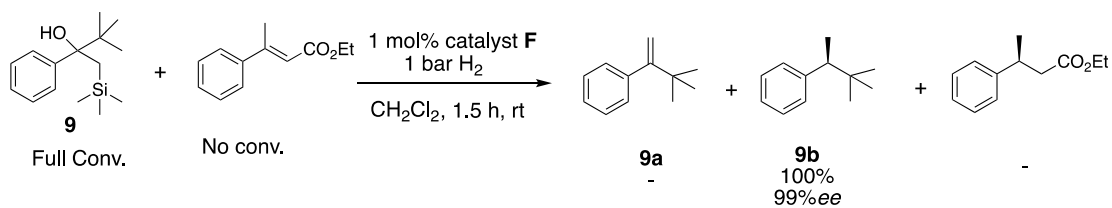

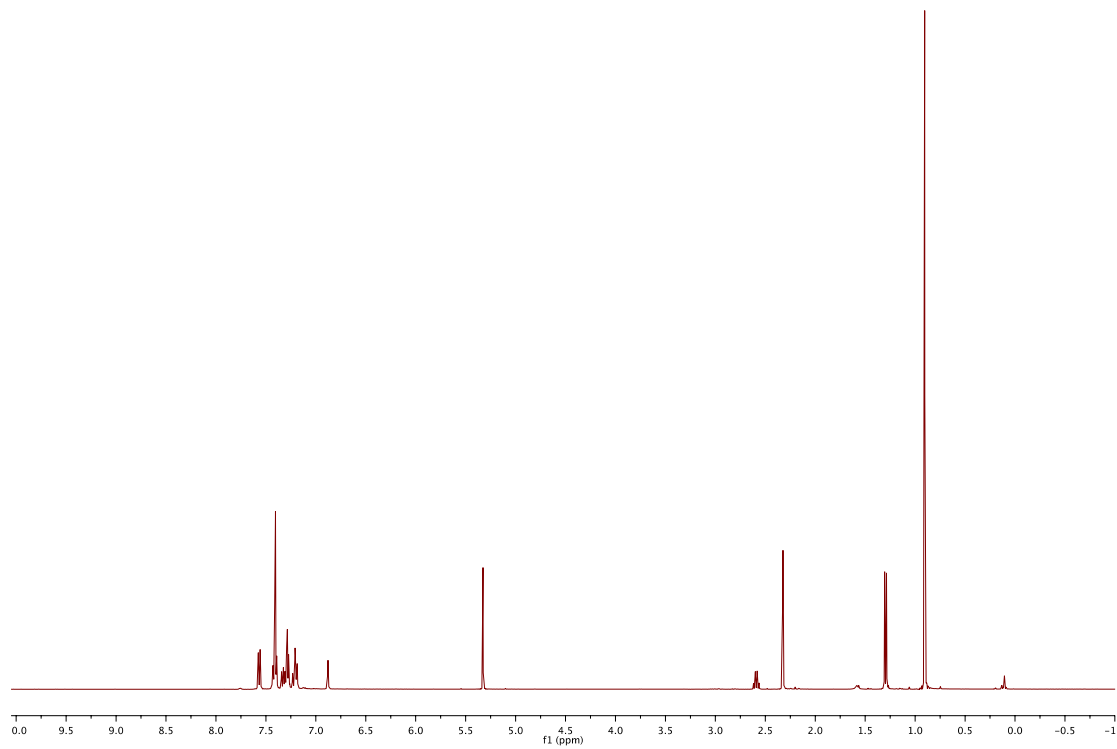

### Chromatogram Plots

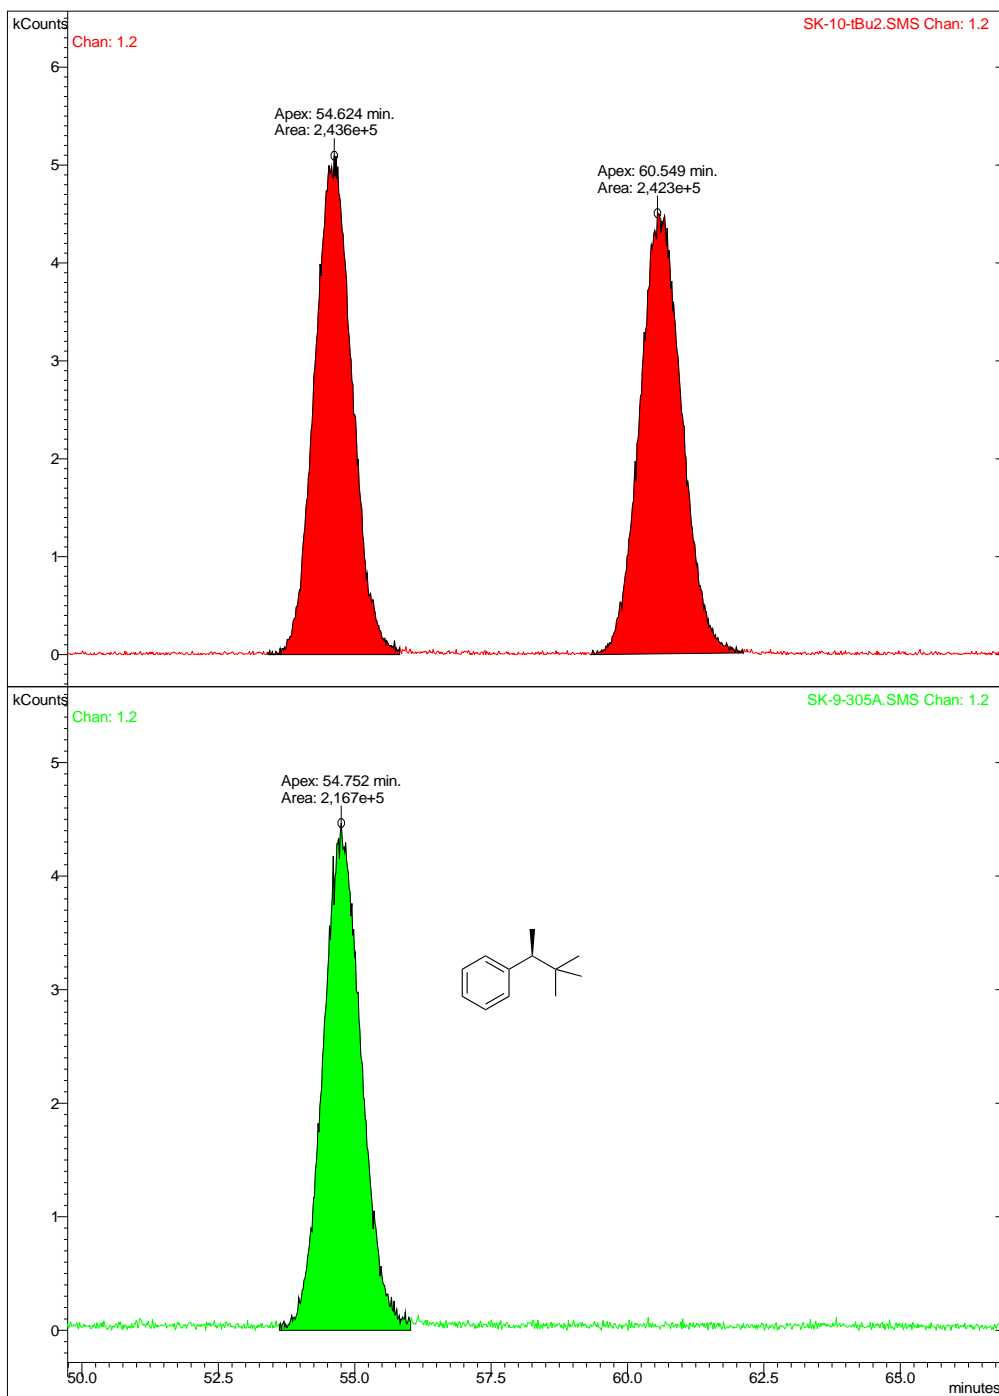



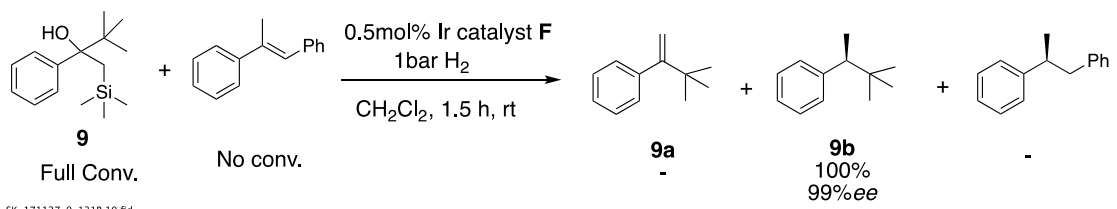

SK-171127-9-1318.10.fid

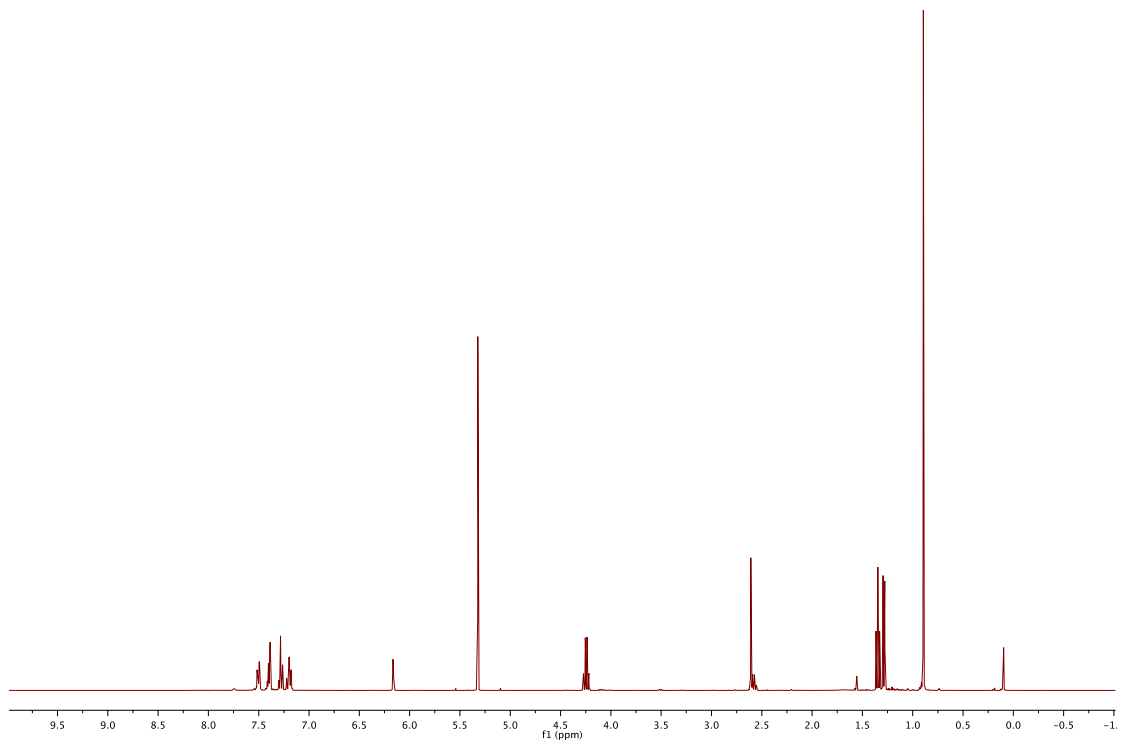

### Chromatogram Plots

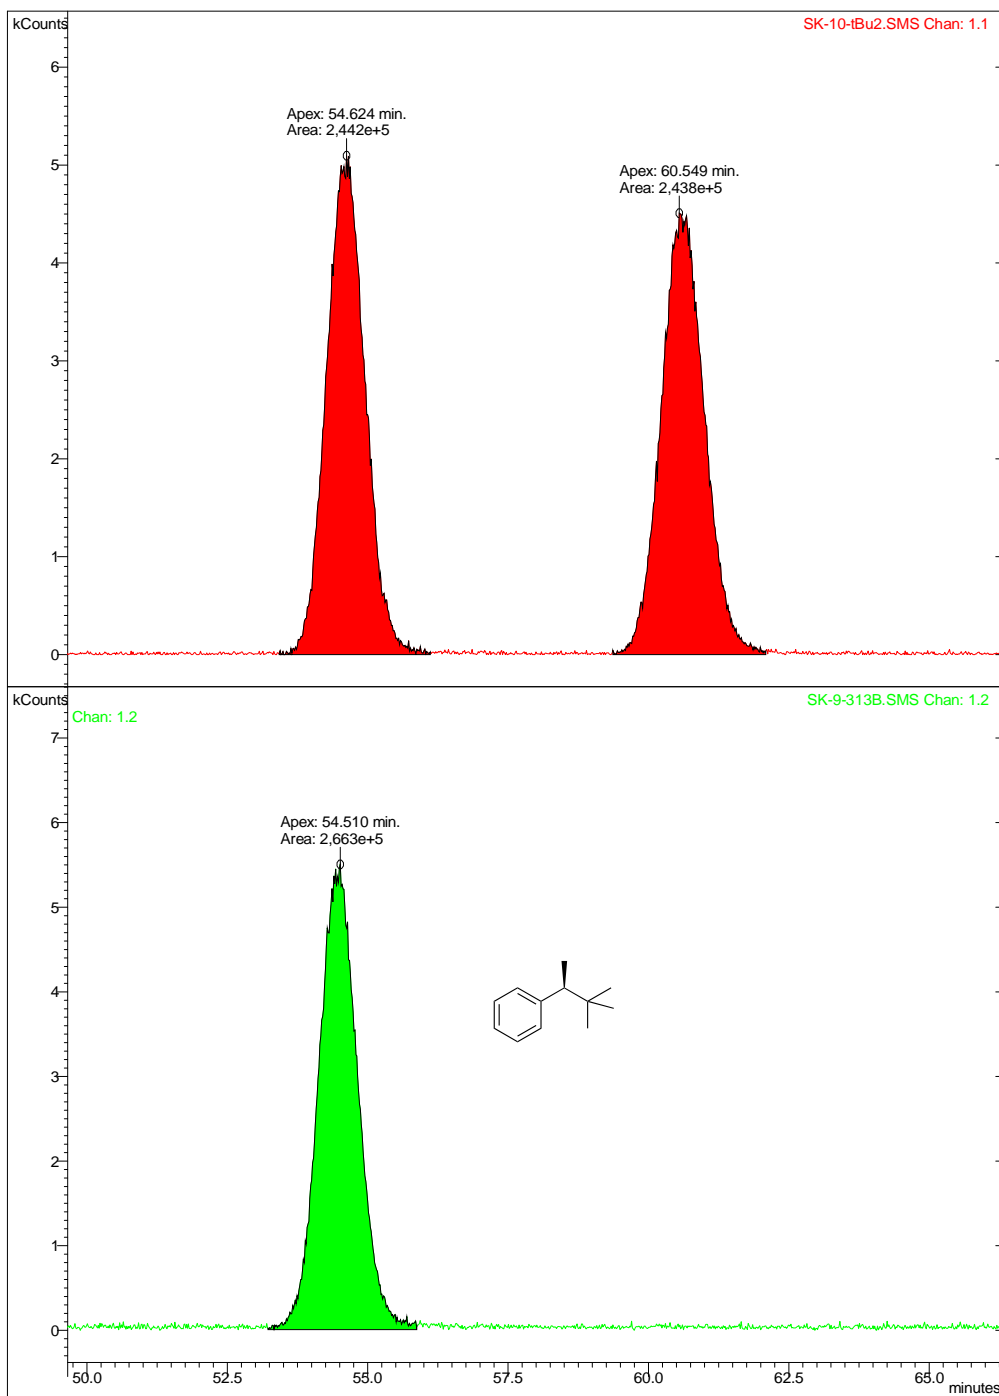

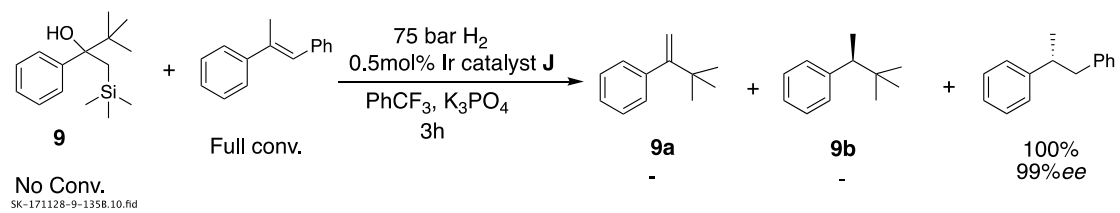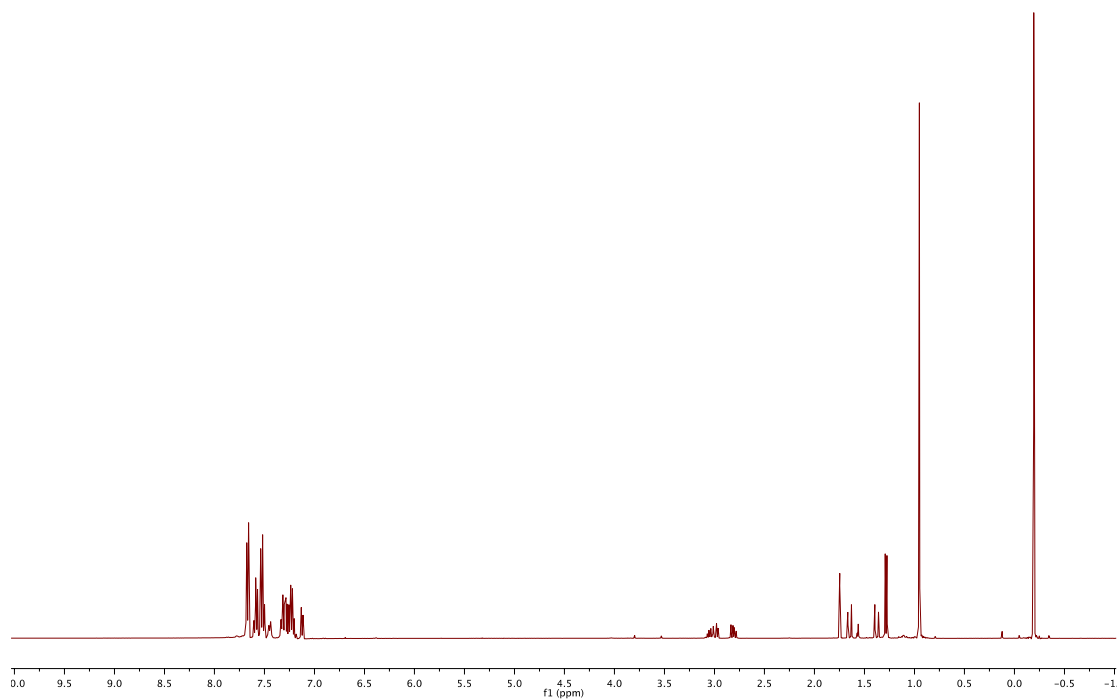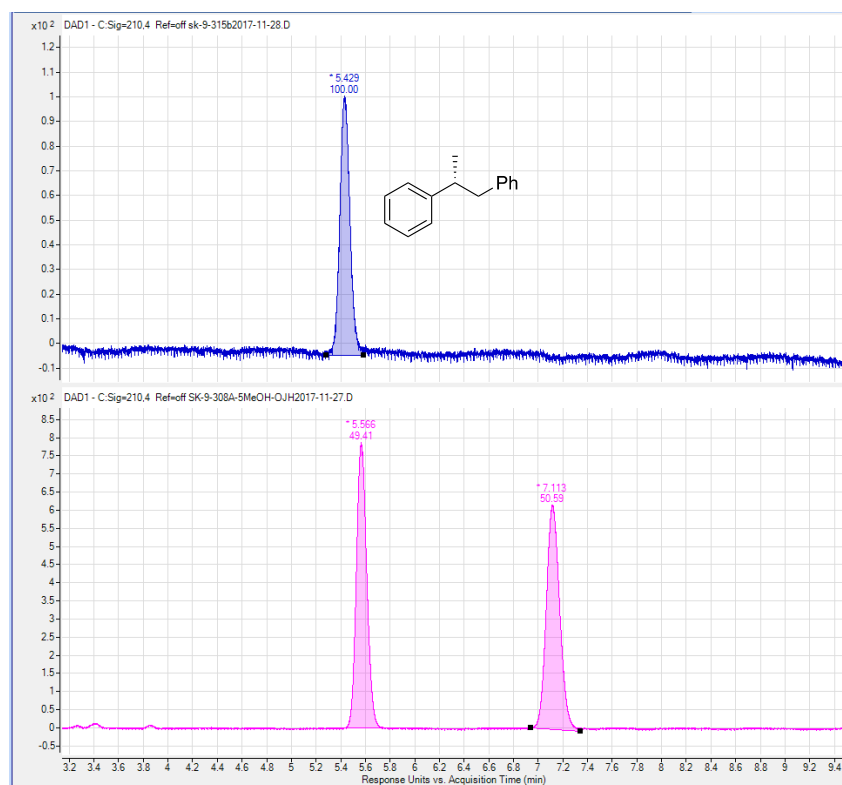

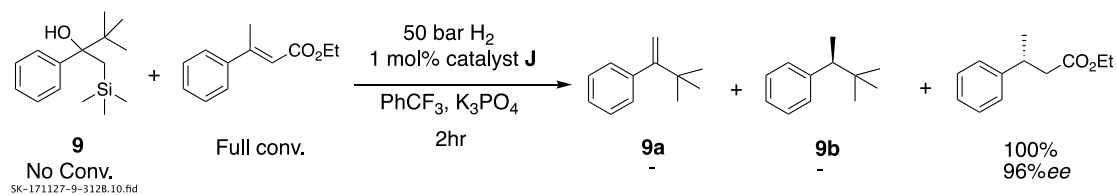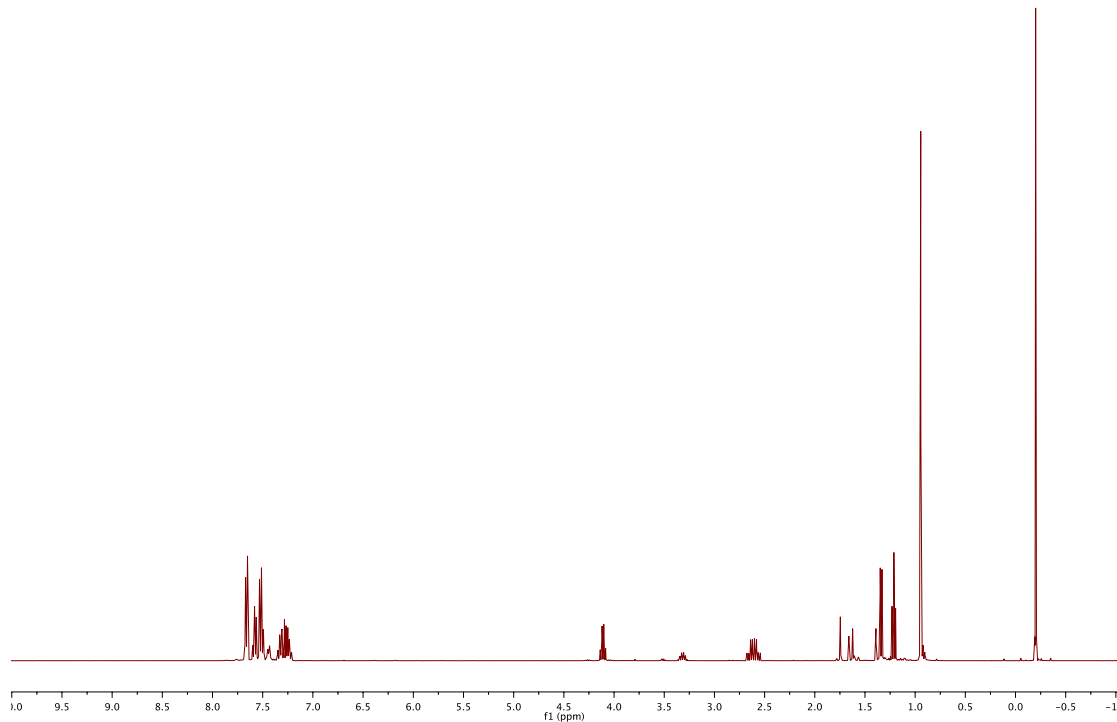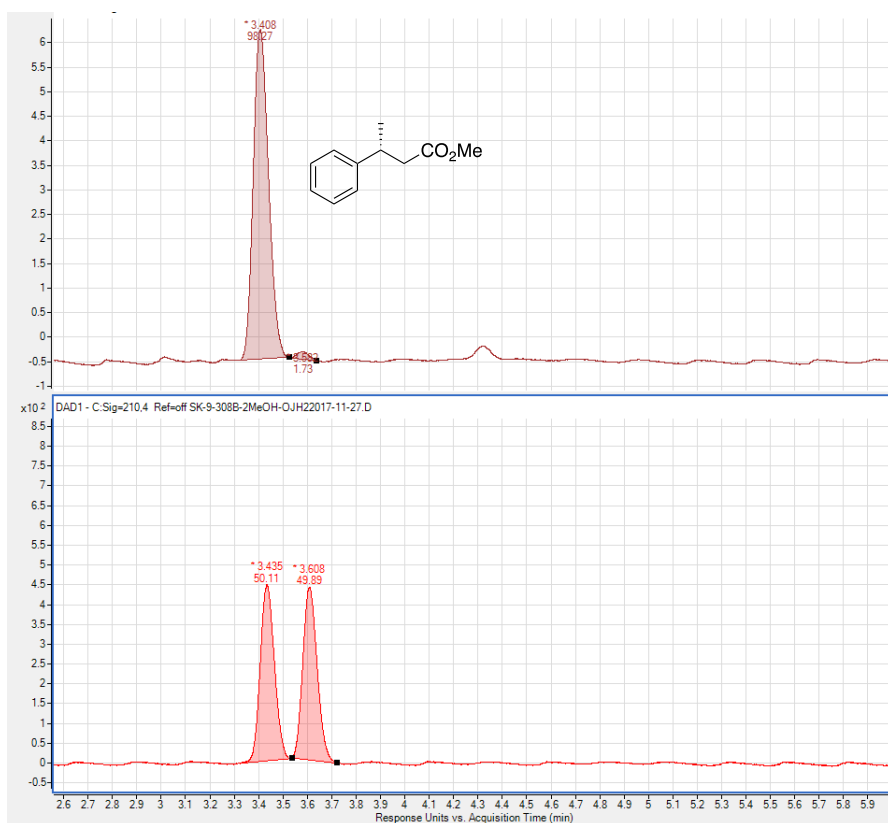

## 10. Additional experiments for mechanistic study.

Separated experiments for Peterson elimination (Step 1)

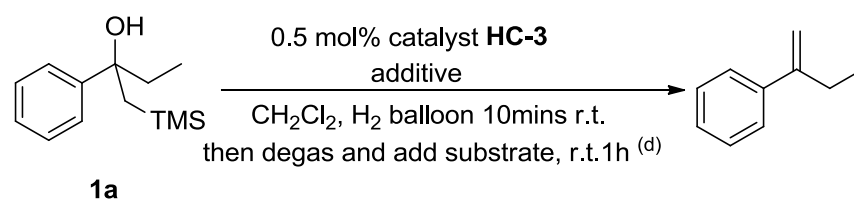

| Entry | additive         | conversion |
|-------|------------------|------------|
| 1     | none             | >99%       |
| 2     | DTBMP ( 10 mol%) | no conv.   |
| 3     | TEMPO ( 10 mol%) | 17%        |

Note: a) reaction carried out in 0.05 mmol scale, conversion determined by  $^1\text{NMR}$ .

b) DTBMP = 2,6-di-tert-butyl-4-methylpyridine.

c) TEMPO = (2,2,6,6-tetramethylpiperidin-1-yl)oxyl.

d) Experimental procedure: A 5 ml vial was charged with Ir complex and sealed with rubber septum. It was then purged by three successive vacuum/nitrogen sequences and then filled with  $\text{H}_2$  (connected with a hydrogen balloon).  $\text{CH}_2\text{Cl}_2$  (0.5ml) was added, then stirred for 10 mins, during which time the orange solution became yellow. Then the hydrogen balloon was removed and the solution was degassed through three freeze-pump-thaw cycles, a solution of the substrate in 0.5 ml  $\text{CH}_2\text{Cl}_2$  was added, the reaction was stirred under nitrogen for 1h.

Results discussion:

1. When the  $\beta$ -hydroxy silane was added to the catalyst, activated by hydrogen gas, in  $\text{CH}_2\text{Cl}_2$ , full conversion to the terminal olefin was obtained, with no hydrogenated product being observed.

2. When the experiment was carried out with a bulky non-coordinating base DTBMP (10 mol%) as an additive, no trace of the terminal olefin was detected. This result further supports the assumption that the free proton is responsible for Peterson elimination.

3. When the experiment was carried out with an Ir-H trap TEMPO (10 mol%) as an additive, 17% conversion to the terminal olefin is still obtained. Although not conclusive, this result further supports the assumption that Ir-H is not directly responsible for the Peterson elimination.

## NMR results:

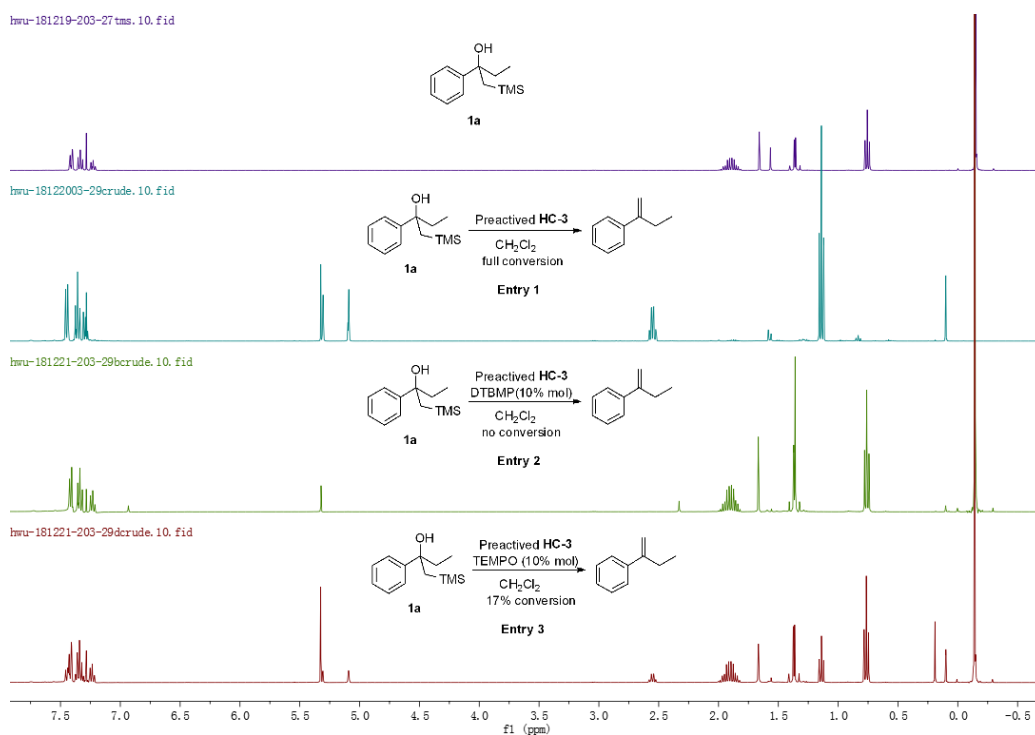

## Separated experiments for asymmetric hydrogenation of terminal olefins (Step 2)

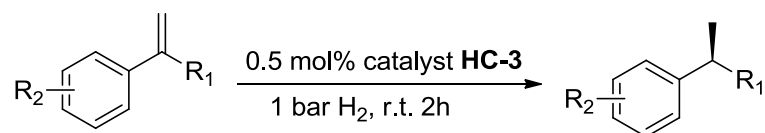

| Entry | substrate                                       | conversion | $ee^a$ | $ee^b$ |
|-------|-------------------------------------------------|------------|--------|--------|
| 1     | $\text{R}_1=\text{Et}, \text{R}_2=\text{H}$     | >99%       | 94%    | 94%    |
| 2     | $\text{R}_1=\text{Et}, \text{R}_2=4\text{-OMe}$ | >99%       | 98%    | 97%    |
| 3     | $\text{R}_1=t\text{-Bu}, \text{R}_2=\text{H}$   | >99%       | 99%    | 99%    |

Note: a) terminal olefin was used as the substrate.  
 b)  $\beta$ -hydro silane was used as the substrate.

## 11. References

---

- 1 TMSCH<sub>2</sub>MgCl was prepared by following the procedure reported in: Yoshida, S.; Nakamura, Y.; Uchida, K.; Hazama, Y.; Hosoya, T. *Org. Lett.* 2016, **18**, 6212.
- 2 Johnson, C. R. and Tait, B. D. *J. Org. Chem.* 1987, **52**, 281.
- 3 Mazuela, J.; Pàmies, O.; Diéguez, M. *Chem. Cat. Chem* 2013, **5**, 2410.
- 4 Biosca, M.; Paptchikhine, A.; Pàmies, O.; Andersson, P. G.; Diéguez, M. *Chem.-Eur. J.* **2015**, *21*, 3455.
- 5 Forman, G. S.; Ohkuma, T.; Hems, W. P.; Noyori, R. *Tetrahedron Lett.* 2000, **41**, 9471.
- 6 T. Nishimura, Y. Yasuhara, T. Sawano and T. Hayashi, *J. Am. Chem. Soc.*, 2010, **132**, 7872.
